# Supplementary material for: Water oxidation electrocatalysis using ruthenium coordination oligomers adsorbed on multiwalled carbon nanotubes
Source: Springer Nature journal article supplement (doi:10.1038/s41557-020-0548-7), 2020-09-28
Supplement: 41557_2020_548_MOESM4_ESM.cif [file 41557_2020_548_MOESM4_ESM.cif]

 
data_mo_AH95dimer_0m
 

# start Validation Reply Form
_vrf_PLAT084_mo_AH95dimer_0m
;
PROBLEM: High wR2 Value (i.e. > 0.25) ...................       0.36 Report
RESPONSE: From this sample the amount available was extremely
 low. The crystals obtained after several crystallization
 attempts were small plates of bad quality and formed of more
 of one crystal. Multicomponent integration was not working
 properly so that finally only one crystal was integrated
 from the measured data. Refinement of the structure was done
 considering the structure as a twin with a monoclinic cell
 with beta approximately 90� (matrix -1 0 0 0 1 0 0 0 1). The
 wR2 Value could not be improved and the data to parameter
 ratio remained low due especially to the high disorder
 present in the structure. Despite the low quality of the data
 collected, it was considered that the quality was sufficient
 to confirm the structure and check the metal-metal distance
 in the dimer.
;
_vrf_PLAT088_mo_AH95dimer_0m
;
PROBLEM: Poor Data / Parameter Ratio ....................       6.40 Note  
RESPONSE: From this sample the amount available was extremely
 low. The crystals obtained after several crystallization
 attempts were small plates of bad quality and formed of more
 of one crystal. Multicomponent integration was not working
 properly so that finally only one crystal was integrated
 from the measured data. Refinement of the structure was done
 considering the structure as a twin with a monoclinic cell
 with beta approximately 90� (matrix -1 0 0 0 1 0 0 0 1). The
 wR2 Value could not be improved and the data to parameter
 ratio remained low due especially to the high disorder
 present in the structure. Despite the low quality of the data
 collected, it was considered that the quality was sufficient
 to confirm the structure and check the metal-metal distance
 in the dimer.
;
# end Validation Reply Form


_audit_creation_method            'SHELXL-2018/3'
_shelx_SHELXL_version_number      '2018/3'
_chemical_name_systematic         ?
_chemical_name_common             ?
_chemical_melting_point           ?
_chemical_formula_moiety          ?
_chemical_formula_sum
 'C66.33 H55.77 N13.17 O13.14 Ru2' 
_chemical_formula_weight          1449.61

loop_
 _atom_type_symbol
 _atom_type_description
 _atom_type_scat_dispersion_real
 _atom_type_scat_dispersion_imag
 _atom_type_scat_source
 'C'  'C'   0.0033   0.0016
 'International Tables Vol C Tables 4.2.6.8 and 6.1.1.4'
 'H'  'H'   0.0000   0.0000
 'International Tables Vol C Tables 4.2.6.8 and 6.1.1.4'
 'N'  'N'   0.0061   0.0033
 'International Tables Vol C Tables 4.2.6.8 and 6.1.1.4'
 'O'  'O'   0.0106   0.0060
 'International Tables Vol C Tables 4.2.6.8 and 6.1.1.4'
 'Ru'  'Ru'  -1.2594   0.8363
 'International Tables Vol C Tables 4.2.6.8 and 6.1.1.4'
 
_space_group_crystal_system       monoclinic
_space_group_IT_number            15
_space_group_name_H-M_alt         'C 2/c'
_space_group_name_Hall            '-C 2yc'
 
_shelx_space_group_comment
;
The symmetry employed for this shelxl refinement is uniquely defined
by the following loop, which should always be used as a source of
symmetry information in preference to the above space-group names.
They are only intended as comments.
;
 
loop_
 _space_group_symop_operation_xyz
 'x, y, z'
 '-x, y, -z+1/2'
 'x+1/2, y+1/2, z'
 '-x+1/2, y+1/2, -z+1/2'
 '-x, -y, -z'
 'x, -y, z-1/2'
 '-x+1/2, -y+1/2, -z'
 'x+1/2, -y+1/2, z-1/2'
 
_cell_length_a                    52.283(6)
_cell_length_b                    9.2918(10)
_cell_length_c                    26.104(3)
_cell_angle_alpha                 90
_cell_angle_beta                  90.700(4)
_cell_angle_gamma                 90
_cell_volume                      12681(3)
_cell_formula_units_Z             8
_cell_measurement_temperature     100(2)
_cell_measurement_reflns_used      5806
_cell_measurement_theta_min        2.22
_cell_measurement_theta_max       23.92
 
_exptl_crystal_description       'block'
_exptl_crystal_colour            'brown'
_exptl_crystal_density_meas       ?
_exptl_crystal_density_method     ?
_exptl_crystal_density_diffrn     1.519          
_exptl_crystal_F_000              5912
_exptl_transmission_factor_min    ?
_exptl_transmission_factor_max    ?
_exptl_crystal_size_max           0.200
_exptl_crystal_size_mid           0.100
_exptl_crystal_size_min           0.010
_exptl_absorpt_coefficient_mu     0.553
_shelx_estimated_absorpt_T_min    0.897
_shelx_estimated_absorpt_T_max    0.994
_exptl_absorpt_correction_type    multi-scan
_exptl_absorpt_correction_T_min    0.4206
_exptl_absorpt_correction_T_max    0.7452
_exptl_absorpt_process_details    SADABS-2014/4
_exptl_absorpt_special_details    ?
_diffrn_ambient_temperature       100(2)
_diffrn_radiation_wavelength      0.71073
_diffrn_radiation_type            MoK\a
_diffrn_source                    'Microfocus source E025 IuS' 
_diffrn_source_type               'Bruker APEX DUO'
_diffrn_source_power              50
_diffrn_source_current            0.6
_diffrn_source_size               '0.2 mm x 0.2 mm fine focus'
_diffrn_radiation_monochromator   'Quazar MX Multilayer Optics'
_diffrn_detector_type             '4K CCD area detector APEX II'
_diffrn_measurement_device_type   'APEX DUO Kappa 4-axis goniometer' 
_diffrn_measurement_method
;
 Fullsphere data collection, phi and omega scans
;
_diffrn_detector_area_resol_mean  512 
_diffrn_reflns_number             37270
_diffrn_reflns_av_unetI/netI      0.1035
_diffrn_reflns_av_R_equivalents   0.0810
_diffrn_reflns_limit_h_min        -62
_diffrn_reflns_limit_h_max        60
_diffrn_reflns_limit_k_min        -10
_diffrn_reflns_limit_k_max        8
_diffrn_reflns_limit_l_min        -31
_diffrn_reflns_limit_l_max        31
_diffrn_reflns_theta_min          1.096
_diffrn_reflns_theta_max          25.384
_diffrn_reflns_theta_full         25.242
_diffrn_measured_fraction_theta_max   0.972
_diffrn_measured_fraction_theta_full  0.982
_diffrn_reflns_Laue_measured_fraction_max    0.972
_diffrn_reflns_Laue_measured_fraction_full   0.982
_diffrn_reflns_point_group_measured_fraction_max   0.972
_diffrn_reflns_point_group_measured_fraction_full  0.982
_reflns_number_total              11339
_reflns_number_gt                 6497
_reflns_threshold_expression      'I > 2\s(I)'
_reflns_Friedel_coverage          0.000
_reflns_Friedel_fraction_max      .
_reflns_Friedel_fraction_full     .
 
_reflns_special_details
;
 Reflections were merged by SHELXL according to the crystal
 class for the calculation of statistics and refinement.
 
 _reflns_Friedel_fraction is defined as the number of unique
 Friedel pairs measured divided by the number that would be
 possible theoretically, ignoring centric projections and
 systematic absences. Completness statistics refer to single and
 composite reflections containing twin component 1 only.
;
 
_computing_data_collection        'Bruker APEX3 v2015.9-0' 
_computing_cell_refinement        'Bruker APEX3 v2015.9-0' 
_computing_data_reduction         'Bruker SAINT V8.35A' 
_computing_structure_solution     'SHELXT V2014/4 (Sheldrick 2014)' 
_computing_structure_refinement   'SHELXL-2014/7 (Sheldrick, 2014)' 
_computing_molecular_graphics
;
 SHELXle: C.B. Huebschle, G.M. Sheldrick & B. Dittrich
 J.Appl.Cryst. (2011) 44, 1281-1284.
; 
_computing_publication_material   'XCIF, SHELXL-2014/7 (Sheldrick, 2014)' 

_refine_special_details
;
 Refined as a 2-component inversion twin.
;
_refine_ls_structure_factor_coef  Fsqd
_refine_ls_matrix_type            full
_refine_ls_weighting_scheme       calc
_refine_ls_weighting_details
'w=1/[\s^2^(Fo^2^)+(0.1000P)^2^] where P=(Fo^2^+2Fc^2^)/3'
_atom_sites_solution_primary      ?
_atom_sites_solution_secondary    ?
_atom_sites_solution_hydrogens    mixed
_refine_ls_hydrogen_treatment     mixed
_refine_ls_extinction_method      none
_refine_ls_extinction_coef        .
_refine_ls_number_reflns          11339
_refine_ls_number_parameters      1757
_refine_ls_number_restraints      4609
_refine_ls_R_factor_all           0.2116
_refine_ls_R_factor_gt            0.1437
_refine_ls_wR_factor_ref          0.3595
_refine_ls_wR_factor_gt           0.3241
_refine_ls_goodness_of_fit_ref    1.928
_refine_ls_restrained_S_all       1.650
_refine_ls_shift/su_max           0.000
_refine_ls_shift/su_mean          0.000
 
loop_
 _atom_site_label
 _atom_site_type_symbol
 _atom_site_fract_x
 _atom_site_fract_y
 _atom_site_fract_z
 _atom_site_U_iso_or_equiv
 _atom_site_adp_type
 _atom_site_occupancy
 _atom_site_site_symmetry_order  
 _atom_site_calc_flag
 _atom_site_refinement_flags_posn
 _atom_site_refinement_flags_adp
 _atom_site_refinement_flags_occupancy
 _atom_site_disorder_assembly
 _atom_site_disorder_group
Ru1 Ru 0.17372(16) -0.0414(8) 0.6214(2) 0.0343(13) Uani 0.521(7) 1 d D U P A 1
N1A N 0.1757(6) -0.081(4) 0.5449(8) 0.044(2) Uani 0.521(7) 1 d D U P A 1
C1A C 0.1814(7) 0.037(3) 0.5179(14) 0.048(3) Uani 0.521(7) 1 d D U P A 1
C2A C 0.1863(6) 0.013(4) 0.4667(13) 0.048(3) Uani 0.521(7) 1 d . U P A 1
H2A H 0.190337 0.091515 0.444756 0.058 Uiso 0.521(7) 1 calc R U P A 1
C3A C 0.1853(6) -0.119(4) 0.4487(14) 0.049(3) Uani 0.521(7) 1 d . U P A 1
H3A H 0.186971 -0.136556 0.413045 0.059 Uiso 0.521(7) 1 calc R U P A 1
C4A C 0.1816(6) -0.239(4) 0.4834(14) 0.046(3) Uani 0.521(7) 1 d . U P A 1
H4A H 0.180833 -0.334246 0.470636 0.055 Uiso 0.521(7) 1 calc R U P A 1
C5A C 0.1795(6) -0.215(4) 0.5305(15) 0.045(2) Uani 0.521(7) 1 d . U P A 1
N2A N 0.1709(5) -0.253(3) 0.6206(12) 0.041(2) Uani 0.521(7) 1 d . U P A 1
C6A C 0.1708(6) -0.325(4) 0.5752(16) 0.043(2) Uani 0.521(7) 1 d . U P A 1
C7A C 0.1665(6) -0.464(3) 0.5629(13) 0.045(3) Uani 0.521(7) 1 d . U P A 1
H7A H 0.166610 -0.505243 0.529625 0.054 Uiso 0.521(7) 1 calc R U P A 1
C8A C 0.1613(6) -0.541(4) 0.6142(13) 0.047(3) Uani 0.521(7) 1 d . U P A 1
H8A H 0.157300 -0.639936 0.611216 0.056 Uiso 0.521(7) 1 calc R U P A 1
C9A C 0.1615(6) -0.497(4) 0.6558(15) 0.044(3) Uani 0.521(7) 1 d . U P A 1
H9A H 0.158527 -0.556347 0.684727 0.053 Uiso 0.521(7) 1 calc R U P A 1
C10A C 0.1670(6) -0.336(4) 0.6605(14) 0.043(2) Uani 0.521(7) 1 d . U P A 1
N3A N 0.1728(5) -0.085(3) 0.6939(9) 0.046(2) Uani 0.521(7) 1 d D U P A 1
C11A C 0.1707(7) -0.250(4) 0.7076(15) 0.046(2) Uani 0.521(7) 1 d . U P A 1
C12A C 0.1714(6) -0.298(4) 0.7552(13) 0.049(3) Uani 0.521(7) 1 d . U P A 1
H12A H 0.167325 -0.396613 0.760804 0.059 Uiso 0.521(7) 1 calc R U P A 1
C13A C 0.1773(8) -0.219(5) 0.7955(15) 0.051(3) Uani 0.521(7) 1 d . U P A 1
H13A H 0.180736 -0.263825 0.827529 0.061 Uiso 0.521(7) 1 calc R U P A 1
C14A C 0.1784(6) -0.078(4) 0.7914(14) 0.052(3) Uani 0.521(7) 1 d . U P A 1
H14A H 0.180271 -0.020447 0.821234 0.063 Uiso 0.521(7) 1 calc R U P A 1
C15A C 0.1769(7) -0.012(3) 0.7415(15) 0.053(2) Uani 0.521(7) 1 d D U P A 1
C16A C 0.1819(7) 0.176(3) 0.5509(9) 0.052(3) Uani 0.521(7) 1 d D U P A 1
O3A O 0.1765(5) 0.175(3) 0.5997(8) 0.052(3) Uani 0.521(7) 1 d D U P A 1
O4A O 0.1856(5) 0.282(3) 0.5250(9) 0.065(4) Uani 0.521(7) 1 d D U P A 1
C17A C 0.1795(5) 0.151(3) 0.7363(13) 0.059(3) Uani 0.521(7) 1 d D U P A 1
O1A O 0.2015(4) 0.201(3) 0.7315(9) 0.056(4) Uani 0.521(7) 1 d D U P A 1
O2A O 0.1616(5) 0.225(3) 0.7157(12) 0.085(5) Uani 0.521(7) 1 d D U P A 1
Ru1' Ru 0.17636(19) -0.0351(10) 0.6372(3) 0.0367(14) Uani 0.479(7) 1 d D U P A 2
N1A' N 0.1768(7) -0.070(4) 0.5640(9) 0.043(2) Uani 0.479(7) 1 d D U P A 2
C1A' C 0.1777(8) -0.010(3) 0.5216(18) 0.047(2) Uani 0.479(7) 1 d D U P A 2
C2A' C 0.1773(7) -0.068(4) 0.4731(15) 0.048(3) Uani 0.479(7) 1 d . U P A 2
H2A' H 0.177603 -0.002319 0.445079 0.057 Uiso 0.479(7) 1 calc R U P A 2
C3A' C 0.1765(7) -0.212(4) 0.4621(15) 0.047(3) Uani 0.479(7) 1 d . U P A 2
H3A' H 0.175761 -0.246493 0.427941 0.056 Uiso 0.479(7) 1 calc R U P A 2
C4A' C 0.1770(6) -0.318(4) 0.5104(13) 0.045(3) Uani 0.479(7) 1 d . U P A 2
H4A' H 0.178313 -0.419381 0.506834 0.054 Uiso 0.479(7) 1 calc R U P A 2
C5A' C 0.1755(7) -0.255(5) 0.5548(16) 0.043(2) Uani 0.479(7) 1 d . U P A 2
N2A' N 0.1738(5) -0.251(3) 0.6491(13) 0.042(2) Uani 0.479(7) 1 d . U P A 2
C6A' C 0.1721(6) -0.323(4) 0.6052(17) 0.042(2) Uani 0.479(7) 1 d . U P A 2
C7A' C 0.1709(6) -0.482(4) 0.6051(14) 0.044(3) Uani 0.479(7) 1 d . U P A 2
H7A' H 0.169407 -0.541415 0.575575 0.053 Uiso 0.479(7) 1 calc R U P A 2
C8A' C 0.1723(7) -0.533(4) 0.6572(14) 0.045(3) Uani 0.479(7) 1 d . U P A 2
H8A' H 0.174347 -0.632706 0.663553 0.054 Uiso 0.479(7) 1 calc R U P A 2
C9' C 0.1707(6) -0.446(4) 0.6951(14) 0.045(3) Uani 0.479(7) 1 d . U P A 2
H9' H 0.168817 -0.485498 0.728457 0.054 Uiso 0.479(7) 1 calc R U P A 2
C10' C 0.1717(7) -0.298(4) 0.6899(17) 0.044(2) Uani 0.479(7) 1 d . U P A 2
N3A' N 0.1793(6) -0.058(4) 0.7152(9) 0.049(2) Uani 0.479(7) 1 d D U P A 2
C11' C 0.1767(7) -0.191(4) 0.7325(15) 0.048(2) Uani 0.479(7) 1 d . U P A 2
C12' C 0.1814(8) -0.219(6) 0.7813(16) 0.051(3) Uani 0.479(7) 1 d . U P A 2
H12' H 0.180442 -0.316291 0.792505 0.061 Uiso 0.479(7) 1 calc R U P A 2
C13' C 0.1882(7) -0.106(4) 0.8198(16) 0.053(3) Uani 0.479(7) 1 d . U P A 2
H13' H 0.190353 -0.122415 0.855499 0.063 Uiso 0.479(7) 1 calc R U P A 2
C14' C 0.1907(7) 0.025(4) 0.7967(14) 0.053(3) Uani 0.479(7) 1 d . U P A 2
H14' H 0.195758 0.103871 0.817493 0.064 Uiso 0.479(7) 1 calc R U P A 2
C15' C 0.1866(7) 0.050(4) 0.7468(14) 0.054(3) Uani 0.479(7) 1 d D U P A 2
C16' C 0.1772(8) 0.153(3) 0.5332(10) 0.052(3) Uani 0.479(7) 1 d D U P A 2
O1K' O 0.1747(6) 0.175(3) 0.5810(9) 0.055(3) Uani 0.479(7) 1 d D U P A 2
O2K' O 0.1806(6) 0.241(3) 0.5003(10) 0.066(5) Uani 0.479(7) 1 d D U P A 2
C17' C 0.1767(5) 0.167(3) 0.7108(10) 0.060(3) Uani 0.479(7) 1 d D U P A 2
O3K' O 0.1795(5) 0.199(3) 0.6661(9) 0.060(3) Uani 0.479(7) 1 d D U P A 2
O4K' O 0.1612(5) 0.215(3) 0.7434(10) 0.073(5) Uani 0.479(7) 1 d D U P A 2
Ru2 Ru 0.39131(9) 0.0411(6) 0.6350(2) 0.0298(11) Uani 0.450(7) 1 d D U P B 1
N1B N 0.3902(6) 0.091(3) 0.5654(12) 0.034(4) Uani 0.450(7) 1 d D U P B 1
C1B C 0.3912(8) 0.017(3) 0.5116(12) 0.044(4) Uani 0.450(7) 1 d D U P B 1
C2B C 0.3928(7) 0.066(4) 0.4619(12) 0.044(5) Uani 0.450(7) 1 d D U P B 1
H2B H 0.392345 0.005091 0.417952 0.053 Uiso 0.450(7) 1 d R U P B 1
C3B C 0.3917(7) 0.216(5) 0.4493(17) 0.047(5) Uani 0.450(7) 1 d . U P B 1
H3B H 0.392876 0.252941 0.415476 0.057 Uiso 0.450(7) 1 calc R U P B 1
C4B C 0.3882(6) 0.310(4) 0.4980(13) 0.041(5) Uani 0.450(7) 1 d . U P B 1
H4B H 0.385413 0.410537 0.495551 0.049 Uiso 0.450(7) 1 calc R U P B 1
C5B C 0.3893(6) 0.236(3) 0.5489(14) 0.036(4) Uani 0.450(7) 1 d D U P B 1
N2B N 0.3869(5) 0.254(3) 0.6418(13) 0.033(4) Uani 0.450(7) 1 d . U P B 1
C6B C 0.3850(6) 0.324(4) 0.6000(17) 0.034(4) Uani 0.450(7) 1 d . U P B 1
C7B C 0.3817(6) 0.469(4) 0.5977(16) 0.030(4) Uani 0.450(7) 1 d . U P B 1
H7B H 0.381097 0.519680 0.566003 0.036 Uiso 0.450(7) 1 calc R U P B 1
C8B C 0.3791(7) 0.540(4) 0.6441(14) 0.029(5) Uani 0.450(7) 1 d . U P B 1
H8B H 0.376023 0.640042 0.646519 0.034 Uiso 0.450(7) 1 calc R U P B 1
C9B C 0.3813(5) 0.455(3) 0.6853(13) 0.030(5) Uani 0.450(7) 1 d . U P B 1
H9B H 0.379971 0.501356 0.717578 0.036 Uiso 0.450(7) 1 calc R U P B 1
C10B C 0.3854(6) 0.308(4) 0.6869(15) 0.027(4) Uani 0.450(7) 1 d . U P B 1
N3B N 0.3919(6) 0.080(4) 0.7072(14) 0.036(4) Uani 0.450(7) 1 d . U P B 1
C11B C 0.3891(6) 0.201(4) 0.7238(15) 0.034(4) Uani 0.450(7) 1 d . U P B 1
C12B C 0.3896(8) 0.229(5) 0.7702(16) 0.040(5) Uani 0.450(7) 1 d . U P B 1
H12B H 0.384627 0.322171 0.781448 0.048 Uiso 0.450(7) 1 calc R U P B 1
C13B C 0.3988(6) 0.105(4) 0.8138(16) 0.044(5) Uani 0.450(7) 1 d . U P B 1
H13B H 0.402757 0.122154 0.848895 0.053 Uiso 0.450(7) 1 calc R U P B 1
C14B C 0.3996(6) -0.038(4) 0.7865(14) 0.043(5) Uani 0.450(7) 1 d . U P B 1
H14B H 0.401613 -0.122750 0.806281 0.051 Uiso 0.450(7) 1 calc R U P B 1
C15B C 0.3979(7) -0.048(4) 0.7396(14) 0.042(4) Uani 0.450(7) 1 d D U P B 1
C16B C 0.4013(9) -0.187(4) 0.7077(17) 0.044(5) Uani 0.450(7) 1 d D U P B 1
O1B O 0.3986(4) -0.190(2) 0.6615(10) 0.046(4) Uani 0.450(7) 1 d . U P B 1
O2B O 0.4088(5) -0.290(3) 0.7358(11) 0.068(6) Uani 0.450(7) 1 d . U P B 1
C17B C 0.3956(5) -0.142(3) 0.5177(19) 0.055(5) Uani 0.450(7) 1 d D U P B 1
O3B O 0.4168(5) -0.202(3) 0.5276(12) 0.079(7) Uani 0.450(7) 1 d D U P B 1
O4B O 0.3753(5) -0.208(3) 0.5141(12) 0.069(6) Uani 0.450(7) 1 d D U P B 1
Ru2' Ru 0.38853(7) 0.0478(4) 0.6094(2) 0.0298(9) Uani 0.550(7) 1 d D U P B 2
N1B' N 0.3876(5) 0.087(3) 0.5394(10) 0.039(4) Uani 0.550(7) 1 d . U P B 2
C1B' C 0.3878(6) -0.040(3) 0.5007(12) 0.044(4) Uani 0.550(7) 1 d D U P B 2
C2B' C 0.3846(6) -0.024(4) 0.4496(13) 0.050(5) Uani 0.550(7) 1 d . U P B 2
H2B' H 0.383761 -0.106442 0.427953 0.060 Uiso 0.550(7) 1 calc R U P B 2
C3B' C 0.3826(5) 0.118(3) 0.4283(13) 0.049(5) Uani 0.550(7) 1 d . U P B 2
H3B' H 0.380735 0.134027 0.392491 0.059 Uiso 0.550(7) 1 calc R U P B 2
C4B' C 0.3835(5) 0.234(4) 0.4652(12) 0.039(5) Uani 0.550(7) 1 d . U P B 2
H4B' H 0.383586 0.330009 0.452885 0.047 Uiso 0.550(7) 1 calc R U P B 2
C5B' C 0.3842(5) 0.211(3) 0.5171(13) 0.038(4) Uani 0.550(7) 1 d . U P B 2
N2B' N 0.3844(4) 0.249(3) 0.6113(11) 0.035(3) Uani 0.550(7) 1 d . U P B 2
C6B' C 0.3834(5) 0.315(3) 0.5651(13) 0.036(4) Uani 0.550(7) 1 d . U P B 2
C7B' C 0.3787(5) 0.459(3) 0.5570(11) 0.034(4) Uani 0.550(7) 1 d . U P B 2
H7B' H 0.376699 0.500693 0.523990 0.040 Uiso 0.550(7) 1 calc R U P B 2
C8B' C 0.3775(5) 0.531(3) 0.5986(12) 0.034(4) Uani 0.550(7) 1 d . U P B 2
H8B' H 0.373202 0.630514 0.595833 0.041 Uiso 0.550(7) 1 calc R U P B 2
C9B' C 0.3813(6) 0.483(3) 0.6421(13) 0.032(4) Uani 0.550(7) 1 d . U P B 2
H9B' H 0.382239 0.548242 0.670015 0.039 Uiso 0.550(7) 1 calc R U P B 2
C10" C 0.3844(5) 0.332(3) 0.6527(13) 0.031(3) Uani 0.550(7) 1 d . U P B 2
N3B" N 0.3898(4) 0.089(2) 0.6821(10) 0.035(3) Uani 0.550(7) 1 d D U P B 2
C11" C 0.3895(6) 0.236(3) 0.6948(14) 0.039(4) Uani 0.550(7) 1 d D U P B 2
C12" C 0.3916(5) 0.308(3) 0.7418(11) 0.039(4) Uani 0.550(7) 1 d . U P B 2
H12" H 0.390015 0.409728 0.743230 0.047 Uiso 0.550(7) 1 calc R U P B 2
C13" C 0.3963(6) 0.226(4) 0.7886(13) 0.041(5) Uani 0.550(7) 1 d . U P B 2
H13" H 0.397719 0.265596 0.822128 0.050 Uiso 0.550(7) 1 calc R U P B 2
C14" C 0.3985(5) 0.074(3) 0.7757(13) 0.042(4) Uani 0.550(7) 1 d . U P B 2
H14" H 0.401718 0.007075 0.802605 0.050 Uiso 0.550(7) 1 calc R U P B 2
C15" C 0.3962(6) 0.022(3) 0.7262(10) 0.038(4) Uani 0.550(7) 1 d D U P B 2
C16" C 0.3984(7) -0.143(3) 0.7219(15) 0.049(4) Uani 0.550(7) 1 d D U P B 2
O1B' O 0.3786(4) -0.214(2) 0.7242(8) 0.056(5) Uani 0.550(7) 1 d . U P B 2
O2B' O 0.4220(5) -0.185(2) 0.7189(9) 0.069(5) Uani 0.550(7) 1 d . U P B 2
C17" C 0.3906(7) -0.181(3) 0.5301(15) 0.049(5) Uani 0.550(7) 1 d D U P B 2
O3B' O 0.3911(4) -0.171(2) 0.5821(8) 0.049(4) Uani 0.550(7) 1 d . U P B 2
O4B' O 0.3943(4) -0.287(2) 0.5034(9) 0.057(5) Uani 0.550(7) 1 d . U P B 2
C1C C 0.3342(3) 0.0832(18) 0.5893(7) 0.048(4) Uani 1 1 d . U . . .
H1C H 0.341574 0.141275 0.563412 0.057 Uiso 1 1 calc R U . . .
C2C C 0.3070(3) 0.0738(17) 0.5898(6) 0.044(4) Uani 1 1 d . U . . .
H2C H 0.296729 0.126370 0.566081 0.053 Uiso 1 1 calc R U . . .
C3C C 0.2966(2) -0.0116(18) 0.6249(8) 0.040(3) Uani 1 1 d . U . . .
C4C C 0.3129(3) -0.0840(18) 0.6561(7) 0.045(4) Uani 1 1 d . U . . .
H4C H 0.305722 -0.146055 0.681042 0.054 Uiso 1 1 calc R U . . .
C5C C 0.3392(3) -0.0742(18) 0.6542(7) 0.048(4) Uani 1 1 d . U . . .
H5C H 0.349552 -0.132771 0.675864 0.057 Uiso 1 1 calc R U . . .
N1C N 0.3502(2) 0.0185(14) 0.6215(7) 0.045(3) Uani 1 1 d . U . . .
C6C C 0.2687(3) -0.0252(17) 0.6290(8) 0.048(3) Uani 1 1 d . U . . .
C7C C 0.2532(3) 0.0950(19) 0.6201(8) 0.059(4) Uani 1 1 d . U . . .
H7C H 0.260950 0.184007 0.611457 0.071 Uiso 1 1 calc DR U . . .
C8C C 0.2278(3) 0.0887(17) 0.6233(8) 0.056(4) Uani 1 1 d . U . . .
H8C H 0.217986 0.174685 0.621224 0.067 Uiso 1 1 calc R U . . .
N2C N 0.2158(2) -0.0397(12) 0.6295(7) 0.050(3) Uani 1 1 d . U . . .
C9C C 0.2293(3) -0.1568(17) 0.6345(7) 0.054(4) Uani 1 1 d . U . . .
H9C H 0.220838 -0.246640 0.638318 0.065 Uiso 1 1 calc R U . . .
C10C C 0.2554(3) -0.1522(16) 0.6344(7) 0.052(4) Uani 1 1 d . U . . .
H10C H 0.264737 -0.239509 0.638061 0.063 Uiso 1 1 calc R U . . .
N1D N 0.4306(2) 0.058(3) 0.6359(13) 0.061(4) Uani 0.456(11) 1 d DG U P B 1
C1D C 0.4440(4) 0.186(2) 0.6311(12) 0.065(4) Uani 0.456(11) 1 d G U P B 1
H1D H 0.435180 0.275548 0.632843 0.077 Uiso 0.456(11) 1 calc R U P B 1
C2D C 0.4703(4) 0.184(3) 0.6238(13) 0.069(3) Uani 0.456(11) 1 d G U P B 1
H2D H 0.479436 0.272079 0.620585 0.083 Uiso 0.456(11) 1 calc R U P B 1
C3D C 0.4832(2) 0.054(3) 0.6213(13) 0.075(3) Uani 0.456(11) 1 d DG U P B 1
C4D C 0.4698(4) -0.075(3) 0.6261(16) 0.069(4) Uani 0.456(11) 1 d G U P B 1
H4D H 0.478379 -0.164626 0.623657 0.082 Uiso 0.456(11) 1 calc R U P B 1
C5D C 0.4443(10) -0.069(6) 0.6343(17) 0.063(4) Uani 0.456(11) 1 d G U P B 1
H5D H 0.435398 -0.156828 0.639168 0.076 Uiso 0.456(11) 1 calc R U P B 1
C6D C 0.5117(3) 0.017(4) 0.6326(15) 0.087(3) Uani 0.456(11) 1 d DG U P B 1
C7D C 0.5249(6) -0.012(4) 0.5879(11) 0.094(4) Uani 0.456(11) 1 d G U P B 1
H7D H 0.515752 -0.031880 0.557029 0.113 Uiso 0.456(11) 1 calc R U P B 1
C8D C 0.5515(6) -0.013(4) 0.5884(11) 0.099(4) Uani 0.456(11) 1 d G U P B 1
H8D H 0.560511 -0.033165 0.557877 0.119 Uiso 0.456(11) 1 calc R U P B 1
N2D N 0.5649(3) 0.015(4) 0.6337(15) 0.100(4) Uani 0.456(11) 1 d G U P B 1
C9D C 0.5517(6) 0.044(4) 0.6784(11) 0.099(4) Uani 0.456(11) 1 d G U P B 1
H9D H 0.560808 0.063681 0.709269 0.119 Uiso 0.456(11) 1 calc R U P B 1
C10D C 0.5251(6) 0.045(4) 0.6779(12) 0.096(4) Uani 0.456(11) 1 d G U P B 1
H10D H 0.516049 0.064967 0.708422 0.115 Uiso 0.456(11) 1 calc R U P B 1
N1D' N 0.4278(2) 0.060(3) 0.6082(11) 0.059(3) Uani 0.544(11) 1 d D U P B 2
C1D' C 0.4421(6) 0.172(4) 0.5979(14) 0.064(4) Uani 0.544(11) 1 d . U P B 2
H1D' H 0.432569 0.258437 0.593886 0.077 Uiso 0.544(11) 1 calc R U P B 2
C2D' C 0.4674(6) 0.191(4) 0.5919(14) 0.067(3) Uani 0.544(11) 1 d . U P B 2
H2D' H 0.475297 0.281673 0.586747 0.081 Uiso 0.544(11) 1 calc R U P B 2
C3D' C 0.4801(7) 0.068(5) 0.5938(16) 0.074(3) Uani 0.544(11) 1 d . U P B 2
C4D' C 0.4698(7) -0.073(4) 0.6010(14) 0.067(3) Uani 0.544(11) 1 d . U P B 2
H4D' H 0.479395 -0.159694 0.599092 0.081 Uiso 0.544(11) 1 calc R U P B 2
C5D' C 0.4428(8) -0.065(5) 0.6114(14) 0.062(4) Uani 0.544(11) 1 d . U P B 2
H5D' H 0.434489 -0.151620 0.621254 0.075 Uiso 0.544(11) 1 calc R U P B 2
C6D' C 0.5107(4) 0.115(3) 0.6017(11) 0.087(3) Uani 0.544(11) 1 d G U P B 2
C7D' C 0.5252(5) 0.130(3) 0.6463(9) 0.094(4) Uani 0.544(11) 1 d G U P B 2
H7D' H 0.516968 0.140267 0.678379 0.113 Uiso 0.544(11) 1 calc R U P B 2
C8D' C 0.5518(5) 0.130(3) 0.6441(9) 0.099(4) Uani 0.544(11) 1 d G U P B 2
H8D' H 0.561663 0.140611 0.674656 0.119 Uiso 0.544(11) 1 calc R U P B 2
N2D' N 0.5638(4) 0.115(3) 0.5973(11) 0.103(4) Uani 0.544(11) 1 d G U P B 2
C9D' C 0.5493(5) 0.100(3) 0.5526(9) 0.099(4) Uani 0.544(11) 1 d G U P B 2
H9D' H 0.557538 0.089826 0.520571 0.119 Uiso 0.544(11) 1 calc R U P B 2
C10I C 0.5228(5) 0.100(3) 0.5548(9) 0.096(4) Uani 0.544(11) 1 d G U P B 2
H10I H 0.512843 0.089482 0.524294 0.115 Uiso 0.544(11) 1 calc R U P B 2
N1E N 0.1364(5) -0.010(3) 0.6349(9) 0.033(3) Uani 0.558(10) 1 d . U P A 2
C1E C 0.1246(5) 0.086(3) 0.6714(11) 0.036(3) Uani 0.558(10) 1 d . U P A 2
H1E H 0.135634 0.136195 0.694350 0.043 Uiso 0.558(10) 1 calc R U P A 2
C2E C 0.1002(5) 0.108(3) 0.6752(12) 0.039(3) Uani 0.558(10) 1 d . U P A 2
H2E H 0.093408 0.168669 0.700931 0.047 Uiso 0.558(10) 1 calc R U P A 2
C3E C 0.0811(6) 0.023(3) 0.6322(16) 0.045(3) Uani 0.558(10) 1 d . U P A 2
C4E C 0.0942(6) -0.066(3) 0.6061(12) 0.039(3) Uani 0.558(10) 1 d . U P A 2
H4E H 0.085181 -0.130670 0.584299 0.046 Uiso 0.558(10) 1 calc R U P A 2
C5E C 0.1204(6) -0.073(3) 0.6073(12) 0.036(3) Uani 0.558(10) 1 d . U P A 2
H5E H 0.127547 -0.137851 0.583083 0.044 Uiso 0.558(10) 1 calc R U P A 2
C6E C 0.0547(3) 0.049(3) 0.6534(9) 0.055(3) Uani 0.558(10) 1 d G U P A 2
C7E C 0.0383(4) 0.044(3) 0.6110(7) 0.056(3) Uani 0.558(10) 1 d G U P A 2
H7E H 0.045088 0.033647 0.577641 0.068 Uiso 0.558(10) 1 calc R U P A 2
C8E C 0.0120(3) 0.054(3) 0.6176(7) 0.061(3) Uani 0.558(10) 1 d G U P A 2
H8E H 0.000847 0.050871 0.588695 0.073 Uiso 0.558(10) 1 calc R U P A 2
N2E N 0.0021(3) 0.069(3) 0.6665(8) 0.067(3) Uani 0.558(10) 1 d G U P A 2
C9E C 0.0185(4) 0.074(2) 0.7088(6) 0.066(4) Uani 0.558(10) 1 d G U P A 2
H9E H 0.011743 0.084597 0.742212 0.079 Uiso 0.558(10) 1 calc R U P A 2
C10E C 0.0448(4) 0.064(2) 0.7022(7) 0.062(4) Uani 0.558(10) 1 d G U P A 2
H10E H 0.055985 0.067373 0.731159 0.075 Uiso 0.558(10) 1 calc R U P A 2
N1E' N 0.1331(7) -0.022(4) 0.6166(13) 0.034(3) Uani 0.442(10) 1 d . U P A 1
C1E' C 0.1207(7) 0.060(4) 0.6493(14) 0.036(3) Uani 0.442(10) 1 d . U P A 1
H1E' H 0.130172 0.110742 0.674793 0.043 Uiso 0.442(10) 1 calc R U P A 1
C2E' C 0.0933(7) 0.076(4) 0.6479(16) 0.039(3) Uani 0.442(10) 1 d . U P A 1
H2E' H 0.083250 0.130357 0.671075 0.047 Uiso 0.442(10) 1 calc R U P A 1
C3E' C 0.0837(8) -0.007(5) 0.6041(18) 0.044(3) Uani 0.442(10) 1 d . U P A 1
C4E' C 0.0943(7) -0.075(4) 0.5760(16) 0.040(3) Uani 0.442(10) 1 d . U P A 1
H4E' H 0.085544 -0.122426 0.548683 0.048 Uiso 0.442(10) 1 calc R U P A 1
C5E' C 0.1200(7) -0.089(4) 0.5820(15) 0.037(3) Uani 0.442(10) 1 d . U P A 1
H5E' H 0.128826 -0.152129 0.559507 0.044 Uiso 0.442(10) 1 calc R U P A 1
C6E' C 0.0552(7) 0.034(4) 0.6137(16) 0.053(3) Uani 0.442(10) 1 d . U P A 1
C7E' C 0.0436(8) 0.071(4) 0.5592(16) 0.057(4) Uani 0.442(10) 1 d . U P A 1
H7E' H 0.055034 0.070057 0.531245 0.069 Uiso 0.442(10) 1 calc R U P A 1
C8E' C 0.0156(7) 0.107(5) 0.5471(14) 0.061(4) Uani 0.442(10) 1 d D U P A 1
H8E' H 0.009707 0.141658 0.514837 0.073 Uiso 0.442(10) 1 calc R U P A 1
N2E' N 0.0002(6) 0.084(4) 0.5873(12) 0.062(4) Uani 0.442(10) 1 d D U P A 1
C9E' C 0.0098(8) 0.055(5) 0.6362(18) 0.060(3) Uani 0.442(10) 1 d . U P A 1
H9E' H -0.001374 0.053334 0.664624 0.072 Uiso 0.442(10) 1 calc R U P A 1
C10O C 0.0350(7) 0.028(5) 0.6433(16) 0.059(3) Uani 0.442(10) 1 d . U P A 1
H10O H 0.039048 -0.000455 0.677347 0.071 Uiso 0.442(10) 1 calc R U P A 1
N1T N 0.4401(8) 0.554(5) 0.6337(19) 0.061(6) Uani 0.331(19) 1 d D U P C 1
C1T C 0.4425(10) 0.565(7) 0.5915(19) 0.060(5) Uani 0.331(19) 1 d D U P C 1
C2T C 0.4372(12) 0.571(8) 0.5368(19) 0.064(7) Uani 0.331(19) 1 d D U P C 1
H2TA H 0.453151 0.588842 0.518464 0.097 Uiso 0.331(19) 1 calc R U P C 1
H2TB H 0.429686 0.480191 0.525263 0.097 Uiso 0.331(19) 1 calc R U P C 1
H2TC H 0.425159 0.650058 0.529653 0.097 Uiso 0.331(19) 1 calc R U P C 1
O5W O 0.4445(4) 0.554(2) 0.6724(9) 0.063(5) Uani 0.669(19) 1 d D U P C 2
H5WA H 0.441(5) 0.631(11) 0.688(7) 0.095 Uiso 0.669(19) 1 d D U P C 2
H5WB H 0.442(6) 0.487(14) 0.694(6) 0.095 Uiso 0.669(19) 1 d D U P C 2
O6W O 0.4409(4) 0.557(2) 0.5644(8) 0.058(4) Uani 0.669(19) 1 d D U P C 2
H6WA H 0.447(5) 0.639(10) 0.558(9) 0.087 Uiso 0.669(19) 1 d D U P C 2
H6WB H 0.447(5) 0.503(18) 0.541(7) 0.087 Uiso 0.669(19) 1 d D U P C 2
O5W' O 0.4463(16) 0.632(11) 0.647(4) 0.061(5) Uani 0.15 1 d . U P D 3
H5WC H 0.429962 0.629943 0.648278 0.092 Uiso 0.15 1 d R U P D 3
H5WD H 0.449878 0.721230 0.643097 0.092 Uiso 0.15 1 d R U P D 3
O5W" O 0.459(2) 0.629(13) 0.632(5) 0.061(5) Uani 0.1 1 d . U P E 4
H5WE H 0.447707 0.695318 0.626640 0.091 Uiso 0.1 1 d R U P E 4
H5WF H 0.472627 0.672239 0.639834 0.091 Uiso 0.1 1 d R U P E 4
O6W' O 0.486(2) 0.559(11) 0.627(5) 0.060(6) Uani 0.1 1 d . U P F 5
H6WC H 0.501970 0.522309 0.625901 0.091 Uiso 0.1 1 d R U P F 5
H6WD H 0.485826 0.626822 0.648618 0.091 Uiso 0.1 1 d R U P F 5
O7W O 0.467(2) 0.457(12) 0.632(5) 0.061(5) Uani 0.1 1 d . U P G 6
H7WA H 0.478352 0.395411 0.621473 0.091 Uiso 0.1 1 d R U P G 6
H7WB H 0.476853 0.535433 0.641555 0.091 Uiso 0.1 1 d R U P G 6
O7W' O 0.520(3) 0.694(17) 0.680(6) 0.09(5) Uani 0.1 1 d . U P H 8
H7WC H 0.513384 0.654287 0.705880 0.141 Uiso 0.1 1 d R U P H 8
H7WD H 0.525732 0.774897 0.691343 0.141 Uiso 0.1 1 d R U P H 8
N1U N 0.2575(11) -0.166(6) 0.257(2) 0.068(10) Uani 0.25 1 d D U P I 2
C1U C 0.2601(15) -0.054(6) 0.271(3) 0.068(9) Uani 0.25 1 d D U P I 2
C2U C 0.2668(16) 0.077(7) 0.299(3) 0.066(9) Uani 0.25 1 d D U P I 2
H2UA H 0.283932 0.116744 0.293311 0.099 Uiso 0.25 1 d R U P I 2
H2UB H 0.263725 0.068602 0.335559 0.099 Uiso 0.25 1 d R U P I 2
H2UC H 0.253979 0.140501 0.283140 0.099 Uiso 0.25 1 d R U P I 2
N1V N 0.2790(11) 0.014(8) 0.340(2) 0.069(10) Uani 0.25 1 d D U P J 3
C1V C 0.2659(13) 0.032(8) 0.306(3) 0.069(9) Uani 0.25 1 d D U P J 3
C2V C 0.2433(12) 0.009(9) 0.274(3) 0.067(9) Uani 0.25 1 d D U P J 3
H2VA H 0.243957 0.073793 0.244411 0.100 Uiso 0.25 1 calc R U P J 3
H2VB H 0.242790 -0.090721 0.262376 0.100 Uiso 0.25 1 calc R U P J 3
H2VC H 0.227897 0.030268 0.293856 0.100 Uiso 0.25 1 calc R U P J 3
N1W N 0.2377(13) 0.376(7) 0.515(2) 0.106(9) Uani 0.3333 1 d D U P K 2
C1W C 0.2482(15) 0.428(8) 0.548(2) 0.104(8) Uani 0.3333 1 d D U P K 2
C2W C 0.2595(15) 0.468(8) 0.597(2) 0.100(9) Uani 0.3333 1 d D U P K 2
H2WX H 0.266684 0.565369 0.594607 0.150 Uiso 0.3333 1 calc R U P K 2
H2WY H 0.273096 0.400040 0.606179 0.150 Uiso 0.3333 1 calc DR U P K 2
H2WZ H 0.246301 0.466573 0.623353 0.150 Uiso 0.3333 1 calc R U P K 2
O1W O 0.269132 0.469531 0.606577 0.099(9) Uani 0.25 1 d . U P L 1
H1WA H 0.274890 0.464923 0.637871 0.149 Uiso 0.25 1 d R U P L 1
H1WB H 0.276689 0.401980 0.589448 0.149 Uiso 0.25 1 d R U P L 1
O2W O 0.2397(13) 0.554(7) 0.521(3) 0.107(9) Uani 0.25 1 d D U P M 1
H2WA H 0.239(9) 0.60(4) 0.493(9) 0.160 Uiso 0.25 1 d D U P N 1
H2WB H 0.254(4) 0.51(4) 0.519(18) 0.160 Uiso 0.25 1 d D U P O 1
O1W' O 0.2683(12) 0.468(7) 0.625(3) 0.097(9) Uani 0.25 1 d . U P P 3
H1WC H 0.256027 0.438535 0.643236 0.146 Uiso 0.25 1 d R U P P 3
H1WD H 0.278171 0.513016 0.645799 0.146 Uiso 0.25 1 d R U P P 3
O2W' O 0.2277(14) 0.477(8) 0.573(3) 0.105(9) Uani 0.25 1 d D U P Q 3
H2WC H 0.222(8) 0.49(5) 0.603(8) 0.157 Uiso 0.25 1 d D U P R 3
H2WD H 0.238(7) 0.55(3) 0.567(16) 0.157 Uiso 0.25 1 d D U P S 3
O3W O 0.2278(18) 0.422(11) 0.543(4) 0.106(9) Uani 0.2 1 d D U P T 4
H3WA H 0.219(7) 0.46(4) 0.519(12) 0.158 Uiso 0.2 1 d D U P U 4
H3WB H 0.234(8) 0.34(3) 0.532(16) 0.158 Uiso 0.2 1 d D U P V 4
O4W O 0.3033(8) 0.209(5) 0.2690(18) 0.051(12) Uani 0.25 1 d . U P W 3
H4WA H 0.286519 0.256652 0.245976 0.077 Uiso 0.25 1 d R U P W 3
H4WB H 0.298783 0.266502 0.311640 0.077 Uiso 0.25 1 d R U P W 3
O8W O 0.5295(14) 0.019(7) 0.762(3) 0.099(17) Uani 0.25 1 d . U P X 3
H8WA H 0.542473 0.073295 0.739184 0.149 Uiso 0.25 1 d R U P X 3
H8WB H 0.515898 0.039115 0.738963 0.149 Uiso 0.25 1 d R U P X 3
O8W' O 0.526(2) -0.042(12) 0.749(5) 0.099(17) Uani 0.15 1 d . U P Y 4
H8WC H 0.518797 -0.112730 0.734135 0.148 Uiso 0.15 1 d R U P Y 4
H8WD H 0.516384 0.028705 0.744659 0.148 Uiso 0.15 1 d R U P Y 4
O8W" O 0.518(3) -0.066(16) 0.805(6) 0.099(18) Uani 0.1 1 d D U P Z 5
H8WE H 0.526(7) 0.01(3) 0.80(2) 0.148 Uiso 0.1 1 d D U P A 5
H8WF H 0.508(7) -0.09(5) 0.781(12) 0.148 Uiso 0.1 1 d D U P B 5
O9W O 0.4731(12) 0.326(7) 0.744(3) 0.107(18) Uani 0.25 1 d . U P C 3
H9WA H 0.483113 0.407843 0.750189 0.160 Uiso 0.25 1 d R U P C 3
H9WB H 0.471767 0.284898 0.783108 0.160 Uiso 0.25 1 d R U P C 3
O9W' O 0.4555(17) 0.229(10) 0.733(3) 0.111(18) Uani 0.2 1 d D U P D 4
H9WC H 0.447(8) 0.23(6) 0.705(9) 0.167 Uiso 0.2 1 d D U P E 4
H9WD H 0.451(12) 0.15(3) 0.749(12) 0.167 Uiso 0.2 1 d D U P F 4
O10W O 0.469(2) 0.822(13) 0.497(4) 0.12(2) Uani 0.15 1 d . U P G 3
H10X H 0.485289 0.820059 0.503189 0.184 Uiso 0.15 1 d R U P G 3
H10Y H 0.462993 0.757554 0.516358 0.184 Uiso 0.15 1 d R U P G 3
O10' O 0.4863(12) 0.792(9) 0.452(3) 0.12(2) Uani 0.25 1 d D U P H 4
H10Z H 0.494(7) 0.72(3) 0.439(14) 0.183 Uiso 0.25 1 d D U P I 4
H10T H 0.497(6) 0.83(4) 0.473(13) 0.183 Uiso 0.25 1 d D U P J 4
O11W O 0.0289(12) 0.195(8) 0.498(3) 0.106(17) Uani 0.25 1 d . U P K 3
H11X H 0.022599 0.227017 0.469963 0.159 Uiso 0.25 1 d R U P K 3
H11Y H 0.037546 0.264230 0.510366 0.159 Uiso 0.25 1 d R U P K 3
O11' O 0.0195(15) 0.078(9) 0.486(3) 0.105(17) Uani 0.2 1 d . U P L 4
H11U H 0.003337 0.139230 0.473336 0.158 Uiso 0.2 1 d R U P L 4
H11T H 0.029551 0.145081 0.468324 0.158 Uiso 0.2 1 d R U P L 4
 
loop_
 _atom_site_aniso_label
 _atom_site_aniso_U_11
 _atom_site_aniso_U_22
 _atom_site_aniso_U_33
 _atom_site_aniso_U_23
 _atom_site_aniso_U_13
 _atom_site_aniso_U_12
Ru1 0.031(2) 0.0116(16) 0.060(3) -0.002(2) 0.004(2) 0.0044(14)
N1A 0.042(4) 0.044(3) 0.047(4) -0.002(3) 0.001(3) 0.002(3)
C1A 0.048(4) 0.048(4) 0.048(4) -0.001(3) 0.002(3) 0.001(3)
C2A 0.049(5) 0.047(4) 0.048(4) -0.001(4) 0.003(4) 0.000(4)
C3A 0.050(5) 0.048(4) 0.049(4) -0.001(3) 0.003(4) 0.000(4)
C4A 0.046(4) 0.046(4) 0.047(4) -0.002(3) 0.002(3) 0.001(3)
C5A 0.045(4) 0.044(3) 0.045(3) -0.001(3) 0.000(3) 0.001(3)
N2A 0.040(4) 0.036(3) 0.046(3) -0.001(3) 0.002(3) 0.001(3)
C6A 0.043(4) 0.042(3) 0.045(4) -0.002(3) 0.000(3) 0.001(3)
C7A 0.046(5) 0.044(4) 0.046(4) -0.002(4) 0.000(4) 0.002(4)
C8A 0.047(5) 0.045(4) 0.048(4) 0.000(4) 0.001(4) -0.002(4)
C9A 0.044(4) 0.044(4) 0.045(4) 0.002(3) 0.002(4) 0.000(4)
C10A 0.044(4) 0.042(3) 0.045(3) 0.001(3) 0.002(3) 0.000(3)
N3A 0.044(3) 0.043(3) 0.052(3) -0.003(3) 0.000(3) 0.004(3)
C11A 0.045(4) 0.045(3) 0.047(3) 0.001(3) 0.000(3) 0.001(3)
C12A 0.049(4) 0.049(4) 0.049(4) 0.001(3) 0.001(4) 0.000(4)
C13A 0.051(4) 0.051(4) 0.050(4) 0.000(3) 0.001(4) 0.001(4)
C14A 0.052(4) 0.052(4) 0.052(4) -0.001(3) 0.001(3) 0.000(3)
C15A 0.053(4) 0.052(3) 0.054(3) -0.001(3) 0.000(3) 0.000(3)
C16A 0.055(4) 0.049(4) 0.053(4) 0.000(3) 0.001(4) -0.001(4)
O3A 0.056(4) 0.046(4) 0.054(4) -0.001(3) -0.003(4) 0.001(4)
O4A 0.077(8) 0.062(6) 0.057(7) -0.003(6) 0.003(7) -0.006(7)
C17A 0.062(4) 0.056(4) 0.059(4) -0.002(3) -0.001(4) 0.001(4)
O1A 0.064(6) 0.046(7) 0.060(8) -0.002(7) 0.022(6) 0.001(6)
O2A 0.089(7) 0.077(7) 0.088(8) 0.004(7) -0.012(7) 0.015(6)
Ru1' 0.034(2) 0.022(2) 0.055(3) 0.000(2) -0.001(2) 0.0049(16)
N1A' 0.038(4) 0.041(3) 0.050(3) 0.003(3) 0.000(3) 0.003(3)
C1A' 0.046(4) 0.047(3) 0.048(3) -0.001(3) 0.001(3) 0.001(3)
C2A' 0.047(4) 0.047(4) 0.048(4) 0.000(3) 0.003(3) 0.001(3)
C3A' 0.047(4) 0.046(4) 0.046(4) -0.001(3) 0.002(4) 0.001(4)
C4A' 0.046(4) 0.045(4) 0.045(4) -0.001(3) 0.001(4) 0.001(4)
C5A' 0.041(4) 0.042(3) 0.045(3) -0.001(3) 0.001(3) 0.001(3)
N2A' 0.041(4) 0.041(3) 0.045(3) 0.000(3) 0.001(3) 0.001(3)
C6A' 0.042(4) 0.040(3) 0.044(3) -0.001(3) 0.001(3) 0.000(3)
C7A' 0.045(4) 0.043(4) 0.045(4) 0.000(3) 0.002(3) 0.000(3)
C8A' 0.045(4) 0.044(4) 0.045(4) 0.001(3) 0.002(4) 0.000(4)
C9' 0.045(4) 0.044(4) 0.047(4) 0.001(3) 0.002(4) 0.001(4)
C10' 0.044(4) 0.043(3) 0.046(3) 0.002(3) 0.001(3) 0.001(3)
N3A' 0.048(4) 0.048(3) 0.050(3) -0.002(3) 0.000(3) 0.003(3)
C11' 0.048(4) 0.047(3) 0.049(3) 0.000(3) 0.001(3) 0.002(3)
C12' 0.051(4) 0.050(4) 0.050(4) 0.000(3) 0.000(4) 0.001(4)
C13' 0.052(5) 0.053(5) 0.053(4) -0.001(3) 0.000(4) 0.000(4)
C14' 0.054(5) 0.052(4) 0.053(4) -0.002(4) 0.002(4) 0.000(4)
C15' 0.055(4) 0.052(4) 0.054(4) -0.002(3) 0.000(3) 0.000(3)
C16' 0.055(4) 0.049(4) 0.051(4) 0.001(3) -0.001(4) 0.001(4)
O1K' 0.059(5) 0.049(4) 0.056(4) 0.000(3) 0.000(4) 0.001(4)
O2K' 0.072(8) 0.062(7) 0.064(7) 0.003(6) -0.010(7) -0.007(7)
C17' 0.063(4) 0.058(4) 0.060(4) -0.002(3) -0.001(4) 0.002(4)
O3K' 0.066(5) 0.052(4) 0.061(4) -0.001(3) 0.002(4) 0.001(4)
O4K' 0.080(8) 0.075(8) 0.064(8) 0.001(8) 0.003(7) 0.012(6)
Ru2 0.0331(17) 0.0173(16) 0.039(3) 0.002(2) 0.003(2) 0.0002(13)
N1B 0.032(6) 0.038(6) 0.033(6) -0.005(5) -0.007(6) 0.001(6)
C1B 0.043(7) 0.043(6) 0.045(6) -0.002(6) 0.004(6) -0.003(6)
C2B 0.043(7) 0.044(7) 0.046(7) -0.002(6) 0.004(7) -0.004(7)
C3B 0.049(8) 0.043(7) 0.051(8) -0.001(7) 0.003(7) -0.005(7)
C4B 0.038(7) 0.040(7) 0.045(7) 0.003(6) 0.007(7) -0.001(7)
C5B 0.031(7) 0.037(6) 0.041(6) -0.003(6) 0.004(6) -0.004(6)
N2B 0.032(6) 0.031(6) 0.037(6) 0.001(5) 0.006(6) -0.003(6)
C6B 0.034(6) 0.030(6) 0.037(6) 0.002(6) 0.002(6) 0.000(6)
C7B 0.035(7) 0.026(7) 0.029(7) 0.002(6) 0.005(6) -0.001(6)
C8B 0.032(7) 0.026(7) 0.027(7) -0.002(6) 0.003(6) -0.002(7)
C9B 0.034(7) 0.028(7) 0.028(7) -0.005(6) 0.012(7) 0.000(7)
C10B 0.025(7) 0.024(6) 0.033(6) 0.000(6) 0.008(6) -0.006(6)
N3B 0.033(6) 0.036(6) 0.038(6) 0.000(6) 0.003(6) 0.002(6)
C11B 0.032(6) 0.034(6) 0.035(6) 0.006(5) 0.003(6) -0.005(6)
C12B 0.043(7) 0.039(7) 0.039(7) 0.004(6) -0.002(7) -0.005(7)
C13B 0.048(8) 0.043(8) 0.042(8) 0.004(7) 0.003(7) 0.000(7)
C14B 0.047(8) 0.038(7) 0.044(7) 0.004(6) 0.003(7) 0.002(7)
C15B 0.044(7) 0.037(7) 0.043(7) 0.006(6) 0.000(6) 0.000(6)
C16B 0.049(8) 0.035(8) 0.049(8) 0.005(7) 0.005(8) 0.002(7)
O1B 0.052(8) 0.032(7) 0.055(8) -0.003(6) 0.010(7) 0.001(7)
O2B 0.069(12) 0.051(11) 0.082(12) 0.006(10) 0.001(11) 0.017(10)
C17B 0.053(8) 0.050(7) 0.060(8) 0.000(7) 0.004(7) 0.002(7)
O3B 0.068(10) 0.059(12) 0.110(14) 0.007(12) 0.005(11) 0.022(10)
O4B 0.074(11) 0.050(11) 0.082(13) 0.000(11) -0.011(11) -0.015(10)
Ru2' 0.0321(13) 0.0163(14) 0.041(2) 0.000(2) -0.0013(17) -0.0047(11)
N1B' 0.038(6) 0.034(6) 0.046(6) 0.003(5) 0.011(6) 0.003(6)
C1B' 0.044(7) 0.041(7) 0.047(6) -0.004(6) 0.007(6) 0.003(6)
C2B' 0.052(8) 0.046(7) 0.052(7) 0.000(7) 0.007(7) 0.001(7)
C3B' 0.054(8) 0.043(8) 0.050(8) -0.001(6) 0.003(7) -0.005(7)
C4B' 0.039(7) 0.035(7) 0.044(7) 0.002(6) 0.012(7) -0.007(7)
C5B' 0.035(6) 0.036(6) 0.043(6) 0.004(5) 0.005(6) -0.003(6)
N2B' 0.034(6) 0.028(6) 0.041(6) 0.000(5) 0.000(6) -0.003(6)
C6B' 0.034(6) 0.032(6) 0.043(6) 0.000(6) 0.001(6) -0.005(6)
C7B' 0.038(7) 0.030(7) 0.033(7) 0.005(6) -0.001(7) -0.004(7)
C8B' 0.036(7) 0.036(7) 0.030(7) 0.001(6) 0.004(6) -0.002(7)
C9B' 0.037(7) 0.031(7) 0.030(7) 0.000(6) 0.000(6) 0.000(6)
C10" 0.032(6) 0.026(6) 0.036(6) -0.004(5) 0.006(6) -0.001(6)
N3B" 0.028(6) 0.044(6) 0.033(6) 0.009(5) 0.003(6) 0.002(5)
C11" 0.034(6) 0.043(6) 0.042(6) 0.002(6) 0.003(6) -0.003(6)
C12" 0.037(7) 0.036(7) 0.044(7) 0.007(6) 0.000(7) -0.003(6)
C13" 0.042(8) 0.038(7) 0.045(7) 0.005(6) 0.000(7) -0.005(7)
C14" 0.043(6) 0.041(6) 0.042(6) 0.005(6) 0.001(6) -0.002(6)
C15" 0.038(6) 0.037(6) 0.038(6) -0.002(6) 0.005(6) -0.003(6)
C16" 0.053(7) 0.042(7) 0.051(8) 0.002(6) 0.003(7) 0.000(6)
O1B' 0.068(9) 0.030(9) 0.069(11) 0.004(9) 0.003(9) -0.007(8)
O2B' 0.076(9) 0.046(10) 0.086(12) 0.001(10) 0.013(10) 0.014(9)
C17" 0.046(8) 0.045(7) 0.057(7) -0.001(6) 0.006(7) 0.000(7)
O3B' 0.049(7) 0.033(6) 0.064(7) 0.006(6) 0.002(7) 0.005(6)
O4B' 0.058(10) 0.039(9) 0.075(11) -0.016(9) 0.002(9) -0.005(8)
C1C 0.051(6) 0.027(6) 0.065(7) -0.008(6) 0.016(6) -0.008(5)
C2C 0.047(6) 0.036(7) 0.050(7) -0.002(6) 0.013(6) 0.010(5)
C3C 0.039(5) 0.028(6) 0.054(7) -0.008(6) 0.008(6) -0.002(5)
C4C 0.044(6) 0.032(6) 0.060(7) 0.000(6) 0.006(6) 0.003(5)
C5C 0.042(6) 0.036(7) 0.065(7) -0.010(6) 0.010(6) 0.005(5)
N1C 0.043(5) 0.028(6) 0.063(7) -0.019(6) 0.011(5) -0.005(5)
C6C 0.045(5) 0.035(7) 0.065(7) -0.012(6) 0.017(6) -0.004(5)
C7C 0.051(6) 0.043(7) 0.083(8) 0.006(7) -0.008(7) -0.004(5)
C8C 0.049(6) 0.033(6) 0.085(8) 0.007(7) 0.006(7) 0.007(5)
N2C 0.046(5) 0.033(6) 0.071(7) 0.002(6) 0.015(6) -0.003(4)
C9C 0.042(6) 0.038(6) 0.083(8) 0.009(7) 0.010(6) 0.004(5)
C10C 0.042(6) 0.030(6) 0.086(8) 0.003(7) 0.010(6) 0.000(5)
N1D 0.061(4) 0.059(5) 0.063(5) 0.000(4) 0.000(4) 0.000(3)
C1D 0.064(4) 0.063(5) 0.066(5) 0.000(4) 0.002(4) -0.002(3)
C2D 0.067(4) 0.068(4) 0.071(5) 0.000(4) 0.002(4) -0.003(3)
C3D 0.074(4) 0.073(4) 0.077(4) 0.001(3) 0.002(3) -0.002(3)
C4D 0.068(4) 0.068(4) 0.070(5) 0.000(4) 0.002(4) 0.001(3)
C5D 0.064(4) 0.062(5) 0.064(5) -0.001(4) 0.000(4) 0.001(3)
C6D 0.084(4) 0.088(5) 0.090(5) -0.001(4) 0.001(3) 0.000(3)
C7D 0.092(5) 0.095(5) 0.095(5) 0.000(4) 0.004(3) 0.001(4)
C8D 0.098(5) 0.101(5) 0.100(5) 0.000(4) 0.003(4) 0.001(4)
N2D 0.099(5) 0.101(6) 0.101(5) -0.001(4) 0.001(4) 0.000(4)
C9D 0.097(5) 0.100(6) 0.099(5) 0.001(4) -0.001(4) -0.001(4)
C10D 0.094(5) 0.098(5) 0.096(5) 0.001(4) -0.003(4) 0.000(4)
N1D' 0.060(4) 0.057(5) 0.061(5) 0.000(4) 0.003(4) -0.001(3)
C1D' 0.064(4) 0.063(5) 0.066(5) 0.000(4) 0.002(4) -0.002(3)
C2D' 0.066(4) 0.067(4) 0.069(5) 0.000(4) 0.003(4) -0.004(3)
C3D' 0.073(4) 0.073(4) 0.077(4) -0.001(3) 0.003(3) -0.001(3)
C4D' 0.066(4) 0.067(4) 0.069(5) 0.000(4) 0.000(4) 0.002(3)
C5D' 0.062(4) 0.060(4) 0.064(5) 0.000(4) 0.002(4) 0.002(3)
C6D' 0.084(4) 0.087(5) 0.090(5) 0.001(4) 0.002(3) -0.001(3)
C7D' 0.092(5) 0.095(5) 0.095(5) 0.001(4) -0.002(3) -0.001(4)
C8D' 0.097(5) 0.100(5) 0.100(5) 0.001(4) 0.000(3) -0.001(4)
N2D' 0.101(5) 0.103(6) 0.104(5) 0.000(4) 0.002(4) -0.001(4)
C9D' 0.098(5) 0.100(6) 0.100(5) 0.001(4) 0.003(4) -0.001(4)
C10I 0.094(5) 0.097(6) 0.096(5) 0.001(4) 0.006(4) -0.001(4)
N1E 0.035(4) 0.030(4) 0.034(4) 0.001(4) 0.001(3) 0.005(3)
C1E 0.038(4) 0.033(4) 0.036(4) 0.002(3) 0.002(4) 0.003(4)
C2E 0.041(4) 0.037(4) 0.039(5) 0.001(4) 0.002(4) 0.003(4)
C3E 0.046(4) 0.044(4) 0.046(4) 0.000(3) 0.000(3) 0.000(3)
C4E 0.040(4) 0.037(4) 0.038(4) 0.001(3) -0.001(3) -0.002(3)
C5E 0.039(4) 0.034(4) 0.036(4) 0.002(3) 0.000(3) 0.000(3)
C6E 0.053(4) 0.056(5) 0.055(4) -0.001(4) 0.001(3) 0.001(4)
C7E 0.055(4) 0.056(4) 0.059(4) -0.001(4) -0.001(3) 0.001(4)
C8E 0.059(4) 0.061(4) 0.062(4) 0.000(4) 0.001(3) 0.001(4)
N2E 0.066(4) 0.068(5) 0.067(5) -0.003(4) 0.004(3) -0.001(4)
C9E 0.065(5) 0.067(5) 0.067(5) 0.000(4) 0.003(4) 0.001(4)
C10E 0.062(5) 0.064(5) 0.062(5) -0.002(4) 0.005(4) 0.002(4)
N1E' 0.035(4) 0.031(4) 0.035(4) 0.000(4) 0.000(3) 0.004(3)
C1E' 0.037(4) 0.034(4) 0.037(4) 0.000(3) 0.001(3) 0.002(3)
C2E' 0.040(4) 0.038(4) 0.040(4) 0.000(3) 0.001(3) 0.002(3)
C3E' 0.045(4) 0.043(4) 0.042(4) -0.001(4) -0.001(3) -0.002(3)
C4E' 0.041(4) 0.038(4) 0.041(4) 0.001(4) -0.001(4) -0.002(4)
C5E' 0.039(4) 0.033(4) 0.038(4) 0.001(4) -0.001(4) -0.001(4)
C6E' 0.052(4) 0.054(4) 0.054(4) -0.001(4) 0.000(3) 0.001(3)
C7E' 0.057(5) 0.057(5) 0.058(5) -0.001(4) -0.002(4) 0.003(4)
C8E' 0.059(5) 0.062(5) 0.061(5) -0.001(4) -0.001(4) 0.001(4)
N2E' 0.059(5) 0.063(5) 0.063(5) -0.001(4) 0.000(4) 0.000(4)
C9E' 0.058(4) 0.061(4) 0.061(4) 0.000(4) 0.003(3) 0.000(4)
C10O 0.058(4) 0.060(4) 0.061(4) 0.000(3) 0.003(3) 0.001(3)
N1T 0.057(8) 0.062(8) 0.063(7) 0.002(7) 0.005(7) 0.003(7)
C1T 0.058(6) 0.062(6) 0.062(6) -0.001(4) 0.002(4) 0.002(4)
C2T 0.065(11) 0.064(11) 0.065(8) -0.002(9) 0.000(9) 0.001(9)
O5W 0.054(6) 0.067(7) 0.068(7) -0.004(6) 0.001(5) 0.004(5)
O6W 0.053(6) 0.061(7) 0.059(8) 0.000(7) 0.009(6) 0.005(6)
O5W' 0.057(7) 0.063(7) 0.063(7) -0.002(6) 0.001(6) 0.002(6)
O5W" 0.058(6) 0.062(7) 0.063(7) -0.001(5) 0.001(5) 0.002(5)
O6W' 0.060(9) 0.061(9) 0.060(9) -0.001(7) 0.000(7) 0.002(7)
O7W 0.059(7) 0.062(7) 0.062(7) -0.001(6) 0.001(6) 0.003(5)
O7W' 0.09(5) 0.09(5) 0.09(5) -0.001(11) 0.003(11) -0.001(11)
N1U 0.067(12) 0.070(11) 0.068(12) -0.001(8) 0.000(9) 0.004(9)
C1U 0.069(10) 0.068(10) 0.068(10) 0.000(5) 0.001(5) -0.001(5)
C2U 0.064(11) 0.067(11) 0.066(11) 0.001(7) 0.006(8) -0.002(8)
N1V 0.064(12) 0.070(13) 0.073(12) 0.002(9) 0.006(7) -0.001(9)
C1V 0.069(10) 0.069(10) 0.068(10) 0.000(5) 0.003(4) -0.001(5)
C2V 0.067(11) 0.066(12) 0.068(11) 0.001(8) 0.004(7) 0.000(8)
N1W 0.105(11) 0.108(12) 0.106(11) -0.002(7) 0.001(7) 0.000(8)
C1W 0.104(9) 0.104(9) 0.105(9) 0.000(4) 0.001(4) 0.000(4)
C2W 0.101(11) 0.098(11) 0.102(11) 0.001(8) 0.004(7) 0.000(8)
O1W 0.100(10) 0.097(10) 0.100(11) -0.001(7) 0.001(7) 0.000(7)
O2W 0.106(10) 0.107(10) 0.108(10) -0.001(6) 0.000(6) 0.000(6)
O1W' 0.098(11) 0.094(11) 0.100(12) 0.000(8) 0.002(8) 0.000(8)
O2W' 0.103(10) 0.105(10) 0.105(10) -0.001(6) 0.000(6) 0.000(6)
O3W 0.105(10) 0.106(10) 0.106(10) -0.001(6) 0.002(6) 0.000(6)
O4W 0.050(14) 0.052(15) 0.051(15) 0.003(10) 0.012(10) 0.001(10)
O8W 0.098(18) 0.098(19) 0.100(18) 0.000(8) 0.003(8) 0.001(8)
O8W' 0.098(18) 0.099(19) 0.099(19) 0.000(8) 0.002(8) 0.001(8)
O8W" 0.098(18) 0.098(19) 0.099(19) 0.000(8) 0.002(8) 0.001(8)
O9W 0.106(19) 0.106(19) 0.108(19) 0.004(9) 0.001(9) 0.006(9)
O9W' 0.111(19) 0.11(2) 0.112(19) 0.001(9) 0.000(9) 0.004(9)
O10W 0.12(2) 0.12(2) 0.12(2) 0.001(9) 0.006(9) 0.002(9)
O10' 0.12(2) 0.12(2) 0.12(2) 0.002(9) 0.006(9) 0.003(9)
O11W 0.105(18) 0.108(19) 0.106(19) -0.001(9) 0.006(9) 0.000(9)
O11' 0.103(19) 0.108(19) 0.105(19) -0.001(9) 0.004(9) 0.002(9)
 
_geom_special_details
;
 All esds (except the esd in the dihedral angle between two l.s. planes)
 are estimated using the full covariance matrix.  The cell esds are taken
 into account individually in the estimation of esds in distances, angles
 and torsion angles; correlations between esds in cell parameters are only
 used when they are defined by crystal symmetry.  An approximate (isotropic)
 treatment of cell esds is used for estimating esds involving l.s. planes.
;
 
loop_
 _geom_bond_atom_site_label_1
 _geom_bond_atom_site_label_2
 _geom_bond_distance
 _geom_bond_site_symmetry_2
 _geom_bond_publ_flag
Ru1 N3A 1.94(2) . ?
Ru1 N2A 1.97(3) . ?
Ru1 N1A 2.03(2) . ?
Ru1 O3A 2.09(3) . ?
Ru1 N1E' 2.13(4) . ?
Ru1 N2C 2.208(15) . ?
N1A C5A 1.32(4) . ?
N1A C1A 1.35(5) . ?
C1A C2A 1.38(5) . ?
C1A C16A 1.55(2) . ?
C2A C3A 1.32(5) . ?
C3A C4A 1.44(5) . ?
C4A C5A 1.25(5) . ?
C5A C6A 1.62(5) . ?
N2A C10A 1.32(4) . ?
N2A C6A 1.36(4) . ?
C6A C7A 1.35(4) . ?
C7A C8A 1.55(5) . ?
C8A C9A 1.16(4) . ?
C9A C10A 1.52(5) . ?
C10A C11A 1.48(5) . ?
N3A C15A 1.43(5) . ?
N3A C11A 1.58(5) . ?
C11A C12A 1.32(5) . ?
C12A C13A 1.32(6) . ?
C13A C14A 1.31(6) . ?
C14A C15A 1.44(5) . ?
C15A C17A 1.53(2) . ?
C16A O4A 1.211(18) . ?
C16A O3A 1.307(19) . ?
C17A O1A 1.251(18) . ?
C17A O2A 1.270(19) . ?
Ru1' N1A' 1.94(2) . ?
Ru1' N2A' 2.03(3) . ?
Ru1' N3A' 2.05(2) . ?
Ru1' N2C 2.075(15) . ?
Ru1' N1E 2.10(3) . ?
Ru1' O3K' 2.31(3) . ?
Ru1' O1K' 2.44(3) . ?
N1A' C1A' 1.24(5) . ?
N1A' C5A' 1.74(5) . ?
C1A' C2A' 1.37(5) . ?
C1A' C16' 1.54(2) . ?
C2A' C3A' 1.37(5) . ?
C3A' C4A' 1.60(5) . ?
C4A' C5A' 1.30(5) . ?
C5A' C6A' 1.47(5) . ?
N2A' C10' 1.16(5) . ?
N2A' C6A' 1.33(5) . ?
C6A' C7A' 1.48(5) . ?
C7A' C8A' 1.44(5) . ?
C8A' C9' 1.28(5) . ?
C9' C10' 1.38(5) . ?
C10' C11' 1.51(5) . ?
N3A' C11' 1.32(5) . ?
N3A' C15' 1.35(5) . ?
C11' C12' 1.32(5) . ?
C12' C13' 1.50(6) . ?
C13' C14' 1.36(5) . ?
C14' C15' 1.34(5) . ?
C15' C17' 1.52(2) . ?
C16' O2K' 1.207(18) . ?
C16' O1K' 1.274(19) . ?
C17' O3K' 1.215(18) . ?
C17' O4K' 1.265(19) . ?
Ru2 N1B 1.88(3) . ?
Ru2 N3B 1.92(3) . ?
Ru2 N2B 2.00(3) . ?
Ru2 N1D 2.061(9) . ?
Ru2 N1C 2.184(12) . ?
Ru2 O1B 2.29(2) . ?
N1B C5B 1.42(2) . ?
N1B C1B 1.56(4) . ?
C1B C2B 1.38(2) . ?
C1B C17B 1.50(2) . ?
C2B C3B 1.43(6) . ?
C3B C4B 1.56(6) . ?
C4B C5B 1.49(5) . ?
C5B C6B 1.58(5) . ?
N2B C6B 1.27(5) . ?
N2B C10B 1.28(5) . ?
C6B C7B 1.37(5) . ?
C7B C8B 1.38(5) . ?
C8B C9B 1.34(5) . ?
C9B C10B 1.38(5) . ?
C10B C11B 1.39(5) . ?
N3B C11B 1.22(4) . ?
N3B C15B 1.49(5) . ?
C11B C12B 1.24(5) . ?
C12B C13B 1.68(6) . ?
C13B C14B 1.51(5) . ?
C14B C15B 1.23(5) . ?
C15B C16B 1.55(2) . ?
C16B O1B 1.21(4) . ?
C16B O2B 1.26(5) . ?
C17B O4B 1.23(3) . ?
C17B O3B 1.26(3) . ?
Ru2' N1B' 1.86(3) . ?
Ru2' N2B' 1.88(3) . ?
Ru2' N3B" 1.94(3) . ?
Ru2' N1C 2.051(11) . ?
Ru2' N1D' 2.059(10) . ?
Ru2' O3B' 2.16(2) . ?
N1B' C5B' 1.30(4) . ?
N1B' C1B' 1.55(4) . ?
C1B' C2B' 1.35(4) . ?
C1B' C17" 1.52(2) . ?
C2B' C3B' 1.43(4) . ?
C3B' C4B' 1.45(5) . ?
C4B' C5B' 1.37(4) . ?
C5B' C6B' 1.58(5) . ?
N2B' C10" 1.33(4) . ?
N2B' C6B' 1.35(4) . ?
C6B' C7B' 1.37(4) . ?
C7B' C8B' 1.28(4) . ?
C8B' C9B' 1.24(5) . ?
C9B' C10" 1.43(4) . ?
C10" C11" 1.44(5) . ?
N3B" C15" 1.345(19) . ?
N3B" C11" 1.41(2) . ?
C11" C12" 1.40(4) . ?
C12" C13" 1.46(4) . ?
C13" C14" 1.46(5) . ?
C14" C15" 1.38(4) . ?
C15" C16" 1.55(2) . ?
C16" O1B' 1.23(4) . ?
C16" O2B' 1.29(4) . ?
C17" O4B' 1.23(4) . ?
C17" O3B' 1.36(4) . ?
C1C N1C 1.32(2) . ?
C1C C2C 1.43(2) . ?
C2C C3C 1.33(2) . ?
C3C C4C 1.35(2) . ?
C3C C6C 1.466(18) . ?
C4C C5C 1.38(2) . ?
C5C N1C 1.35(2) . ?
C6C C10C 1.378(19) . ?
C6C C7C 1.40(2) . ?
C7C C8C 1.33(2) . ?
C8C N2C 1.358(19) . ?
N2C C9C 1.302(18) . ?
C9C C10C 1.368(19) . ?
N1D C1D 1.3900 . ?
N1D C5D 1.38(6) . ?
C1D C2D 1.3900 . ?
C2D C3D 1.3900 . ?
C3D C4D 1.3900 . ?
C3D C6D 1.554(17) . ?
C4D C5D 1.35(5) . ?
C6D C7D 1.3900 . ?
C6D C10D 1.3900 . ?
C7D C8D 1.3900 . ?
C8D N2D 1.3900 . ?
N2D C9D 1.3900 . ?
C9D C10D 1.3900 . ?
N1D' C1D' 1.31(4) . ?
N1D' C5D' 1.40(5) . ?
C1D' C2D' 1.35(4) . ?
C2D' C3D' 1.32(5) . ?
C3D' C4D' 1.43(5) . ?
C3D' C6D' 1.67(4) . ?
C4D' C5D' 1.44(5) . ?
C6D' C7D' 1.3900 . ?
C6D' C10I 1.3900 . ?
C7D' C8D' 1.3900 . ?
C8D' N2D' 1.3900 . ?
N2D' C9D' 1.3900 . ?
C9D' C10I 1.3900 . ?
N1E C5E 1.24(4) . ?
N1E C1E 1.45(4) . ?
C1E C2E 1.30(4) . ?
C2E C3E 1.69(5) . ?
C3E C4E 1.28(4) . ?
C3E C6E 1.51(3) . ?
C4E C5E 1.37(4) . ?
C6E C7E 1.3900 . ?
C6E C10E 1.3900 . ?
C7E C8E 1.3900 . ?
C8E N2E 1.3900 . ?
N2E C9E 1.3900 . ?
C9E C10E 1.3900 . ?
N1E' C5E' 1.29(5) . ?
N1E' C1E' 1.32(5) . ?
C1E' C2E' 1.44(5) . ?
C2E' C3E' 1.46(6) . ?
C3E' C4E' 1.12(5) . ?
C3E' C6E' 1.56(5) . ?
C4E' C5E' 1.36(5) . ?
C6E' C10O 1.32(5) . ?
C6E' C7E' 1.58(6) . ?
C7E' C8E' 1.53(5) . ?
C8E' N2E' 1.344(15) . ?
N2E' C9E' 1.39(5) . ?
C9E' C10O 1.35(6) . ?
N1T C1T 1.112(10) . ?
C1T C2T 1.455(10) . ?
N1U C1U 1.112(10) . ?
C1U C2U 1.454(10) . ?
N1V C1V 1.114(11) . ?
C1V C2V 1.458(11) . ?
N1W C1W 1.113(10) . ?
C1W C2W 1.453(10) . ?
 
loop_
 _geom_angle_atom_site_label_1
 _geom_angle_atom_site_label_2
 _geom_angle_atom_site_label_3
 _geom_angle
 _geom_angle_site_symmetry_1
 _geom_angle_site_symmetry_3
 _geom_angle_publ_flag
N3A Ru1 N2A 78.5(13) . . ?
N3A Ru1 N1A 157.4(14) . . ?
N2A Ru1 N1A 79.2(14) . . ?
N3A Ru1 O3A 117.9(11) . . ?
N2A Ru1 O3A 163.7(11) . . ?
N1A Ru1 O3A 84.5(12) . . ?
N3A Ru1 N1E' 92.3(12) . . ?
N2A Ru1 N1E' 90.7(13) . . ?
N1A Ru1 N1E' 91.1(13) . . ?
O3A Ru1 N1E' 88.6(13) . . ?
N3A Ru1 N2C 86.7(9) . . ?
N2A Ru1 N2C 94.7(8) . . ?
N1A Ru1 N2C 92.0(11) . . ?
O3A Ru1 N2C 86.9(9) . . ?
N1E' Ru1 N2C 174.3(11) . . ?
C5A N1A C1A 126(3) . . ?
C5A N1A Ru1 118(3) . . ?
C1A N1A Ru1 112(2) . . ?
N1A C1A C2A 115(3) . . ?
N1A C1A C16A 113(3) . . ?
C2A C1A C16A 132(3) . . ?
C3A C2A C1A 119(3) . . ?
C2A C3A C4A 120(3) . . ?
C5A C4A C3A 120(4) . . ?
C4A C5A N1A 117(4) . . ?
C4A C5A C6A 129(3) . . ?
N1A C5A C6A 110(3) . . ?
C10A N2A C6A 113(4) . . ?
C10A N2A Ru1 126(3) . . ?
C6A N2A Ru1 120(2) . . ?
C7A C6A N2A 133(4) . . ?
C7A C6A C5A 119(3) . . ?
N2A C6A C5A 108(3) . . ?
C6A C7A C8A 105(3) . . ?
C9A C8A C7A 131(4) . . ?
C8A C9A C10A 115(4) . . ?
N2A C10A C11A 108(3) . . ?
N2A C10A C9A 123(3) . . ?
C11A C10A C9A 128(3) . . ?
C15A N3A C11A 106(2) . . ?
C15A N3A Ru1 138(2) . . ?
C11A N3A Ru1 115(2) . . ?
C12A C11A C10A 127(4) . . ?
C12A C11A N3A 123(3) . . ?
C10A C11A N3A 110(3) . . ?
C13A C12A C11A 124(4) . . ?
C14A C13A C12A 120(4) . . ?
C13A C14A C15A 120(4) . . ?
N3A C15A C14A 126(3) . . ?
N3A C15A C17A 114(3) . . ?
C14A C15A C17A 120(3) . . ?
O4A C16A O3A 126(2) . . ?
O4A C16A C1A 111(2) . . ?
O3A C16A C1A 122(2) . . ?
C16A O3A Ru1 106.8(18) . . ?
O1A C17A O2A 116(2) . . ?
O1A C17A C15A 117(3) . . ?
O2A C17A C15A 120(3) . . ?
N1A' Ru1' N2A' 89.2(14) . . ?
N1A' Ru1' N3A' 163.5(15) . . ?
N2A' Ru1' N3A' 75.5(13) . . ?
N1A' Ru1' N2C 82.9(12) . . ?
N2A' Ru1' N2C 93.6(9) . . ?
N3A' Ru1' N2C 91.9(10) . . ?
N1A' Ru1' N1E 90.8(12) . . ?
N2A' Ru1' N1E 92.5(12) . . ?
N3A' Ru1' N1E 95.8(12) . . ?
N2C Ru1' N1E 171.2(9) . . ?
N1A' Ru1' O3K' 118.6(12) . . ?
N2A' Ru1' O3K' 152.2(11) . . ?
N3A' Ru1' O3K' 76.8(11) . . ?
N2C Ru1' O3K' 89.2(8) . . ?
N1E Ru1' O3K' 88.4(10) . . ?
N1A' Ru1' O1K' 62.8(12) . . ?
N2A' Ru1' O1K' 151.3(11) . . ?
N3A' Ru1' O1K' 133.0(12) . . ?
N2C Ru1' O1K' 89.2(9) . . ?
N1E Ru1' O1K' 82.4(11) . . ?
O3K' Ru1' O1K' 56.3(9) . . ?
C1A' N1A' C5A' 109(3) . . ?
C1A' N1A' Ru1' 144(3) . . ?
C5A' N1A' Ru1' 108(2) . . ?
N1A' C1A' C2A' 130(3) . . ?
N1A' C1A' C16' 105(3) . . ?
C2A' C1A' C16' 124(4) . . ?
C3A' C2A' C1A' 125(4) . . ?
C2A' C3A' C4A' 116(3) . . ?
C5A' C4A' C3A' 115(4) . . ?
C4A' C5A' C6A' 128(5) . . ?
C4A' C5A' N1A' 124(4) . . ?
C6A' C5A' N1A' 108(3) . . ?
C10' N2A' C6A' 126(4) . . ?
C10' N2A' Ru1' 122(3) . . ?
C6A' N2A' Ru1' 112(3) . . ?
N2A' C6A' C5A' 123(4) . . ?
N2A' C6A' C7A' 121(3) . . ?
C5A' C6A' C7A' 116(4) . . ?
C8A' C7A' C6A' 109(3) . . ?
C9' C8A' C7A' 122(3) . . ?
C8A' C9' C10' 123(4) . . ?
N2A' C10' C9' 118(4) . . ?
N2A' C10' C11' 114(4) . . ?
C9' C10' C11' 126(4) . . ?
C11' N3A' C15' 121(3) . . ?
C11' N3A' Ru1' 115(3) . . ?
C15' N3A' Ru1' 123(2) . . ?
C12' C11' N3A' 120(4) . . ?
C12' C11' C10' 127(4) . . ?
N3A' C11' C10' 112(3) . . ?
C11' C12' C13' 123(5) . . ?
C14' C13' C12' 111(4) . . ?
C15' C14' C13' 125(4) . . ?
C14' C15' N3A' 120(3) . . ?
C14' C15' C17' 141(3) . . ?
N3A' C15' C17' 94(2) . . ?
O2K' C16' O1K' 127(3) . . ?
O2K' C16' C1A' 122(3) . . ?
O1K' C16' C1A' 111(3) . . ?
C16' O1K' Ru1' 117(2) . . ?
O3K' C17' O4K' 130(3) . . ?
O3K' C17' C15' 136(3) . . ?
O4K' C17' C15' 93(3) . . ?
C17' O3K' Ru1' 94.0(17) . . ?
N1B Ru2 N3B 155.0(14) . . ?
N1B Ru2 N2B 80.8(13) . . ?
N3B Ru2 N2B 74.2(14) . . ?
N1B Ru2 N1D 90.7(13) . . ?
N3B Ru2 N1D 88.4(13) . . ?
N2B Ru2 N1D 92.3(12) . . ?
N1B Ru2 N1C 81.3(10) . . ?
N3B Ru2 N1C 100.3(11) . . ?
N2B Ru2 N1C 89.8(9) . . ?
N1D Ru2 N1C 171.3(10) . . ?
N1B Ru2 O1B 121.9(11) . . ?
N3B Ru2 O1B 83.0(12) . . ?
N2B Ru2 O1B 157.1(12) . . ?
N1D Ru2 O1B 84.5(10) . . ?
N1C Ru2 O1B 96.8(7) . . ?
C5B N1B C1B 98(2) . . ?
C5B N1B Ru2 122(2) . . ?
C1B N1B Ru2 139.7(18) . . ?
C2B C1B C17B 114(3) . . ?
C2B C1B N1B 135(3) . . ?
C17B C1B N1B 110(3) . . ?
C1B C2B C3B 122(3) . . ?
C2B C3B C4B 111(3) . . ?
C5B C4B C3B 118(3) . . ?
N1B C5B C4B 135(3) . . ?
N1B C5B C6B 104(3) . . ?
C4B C5B C6B 121(3) . . ?
C6B N2B C10B 125(4) . . ?
C6B N2B Ru2 116(3) . . ?
C10B N2B Ru2 118(3) . . ?
N2B C6B C7B 124(4) . . ?
N2B C6B C5B 117(4) . . ?
C7B C6B C5B 119(4) . . ?
C6B C7B C8B 116(4) . . ?
C9B C8B C7B 115(3) . . ?
C8B C9B C10B 128(3) . . ?
N2B C10B C9B 112(4) . . ?
N2B C10B C11B 110(3) . . ?
C9B C10B C11B 138(4) . . ?
C11B N3B C15B 124(4) . . ?
C11B N3B Ru2 121(3) . . ?
C15B N3B Ru2 114(2) . . ?
N3B C11B C12B 123(4) . . ?
N3B C11B C10B 115(4) . . ?
C12B C11B C10B 122(4) . . ?
C11B C12B C13B 121(4) . . ?
C14B C13B C12B 107(3) . . ?
C15B C14B C13B 123(4) . . ?
C14B C15B N3B 121(4) . . ?
C14B C15B C16B 126(4) . . ?
N3B C15B C16B 113(3) . . ?
O1B C16B O2B 126(3) . . ?
O1B C16B C15B 123(4) . . ?
O2B C16B C15B 111(4) . . ?
C16B O1B Ru2 107(2) . . ?
O4B C17B O3B 123(3) . . ?
O4B C17B C1B 111(3) . . ?
O3B C17B C1B 126(3) . . ?
N1B' Ru2' N2B' 80.2(12) . . ?
N1B' Ru2' N3B" 157.3(11) . . ?
N2B' Ru2' N3B" 77.4(11) . . ?
N1B' Ru2' N1C 99.5(9) . . ?
N2B' Ru2' N1C 90.9(8) . . ?
N3B" Ru2' N1C 84.1(8) . . ?
N1B' Ru2' N1D' 89.3(11) . . ?
N2B' Ru2' N1D' 93.6(11) . . ?
N3B" Ru2' N1D' 89.0(11) . . ?
N1C Ru2' N1D' 170.8(10) . . ?
N1B' Ru2' O3B' 82.0(10) . . ?
N2B' Ru2' O3B' 162.0(11) . . ?
N3B" Ru2' O3B' 120.5(9) . . ?
N1C Ru2' O3B' 89.4(6) . . ?
N1D' Ru2' O3B' 88.8(10) . . ?
C5B' N1B' C1B' 113(2) . . ?
C5B' N1B' Ru2' 128(2) . . ?
C1B' N1B' Ru2' 119.2(18) . . ?
C2B' C1B' C17" 127(3) . . ?
C2B' C1B' N1B' 124(3) . . ?
C17" C1B' N1B' 109(3) . . ?
C1B' C2B' C3B' 119(3) . . ?
C2B' C3B' C4B' 115(3) . . ?
C5B' C4B' C3B' 123(3) . . ?
N1B' C5B' C4B' 125(3) . . ?
N1B' C5B' C6B' 101(3) . . ?
C4B' C5B' C6B' 134(3) . . ?
C10" N2B' C6B' 117(3) . . ?
C10" N2B' Ru2' 127(3) . . ?
C6B' N2B' Ru2' 116(2) . . ?
N2B' C6B' C7B' 126(3) . . ?
N2B' C6B' C5B' 115(3) . . ?
C7B' C6B' C5B' 119(3) . . ?
C8B' C7B' C6B' 113(3) . . ?
C9B' C8B' C7B' 125(3) . . ?
C8B' C9B' C10" 123(3) . . ?
N2B' C10" C9B' 114(3) . . ?
N2B' C10" C11" 105(3) . . ?
C9B' C10" C11" 141(3) . . ?
C15" N3B" C11" 104(3) . . ?
C15" N3B" Ru2' 139(2) . . ?
C11" N3B" Ru2' 115(2) . . ?
C12" C11" N3B" 132(3) . . ?
C12" C11" C10" 113(3) . . ?
N3B" C11" C10" 115(3) . . ?
C11" C12" C13" 120(3) . . ?
C12" C13" C14" 109(3) . . ?
C15" C14" C13" 123(3) . . ?
N3B" C15" C14" 131(3) . . ?
N3B" C15" C16" 114(2) . . ?
C14" C15" C16" 114(3) . . ?
O1B' C16" O2B' 130(3) . . ?
O1B' C16" C15" 118(3) . . ?
O2B' C16" C15" 112(3) . . ?
O4B' C17" O3B' 128(3) . . ?
O4B' C17" C1B' 115(3) . . ?
O3B' C17" C1B' 116(3) . . ?
C17" O3B' Ru2' 113.1(17) . . ?
N1C C1C C2C 126.1(16) . . ?
C3C C2C C1C 117.4(16) . . ?
C2C C3C C4C 116.7(13) . . ?
C2C C3C C6C 121.1(17) . . ?
C4C C3C C6C 122.2(17) . . ?
C3C C4C C5C 124.6(17) . . ?
N1C C5C C4C 119.9(17) . . ?
C1C N1C C5C 115.0(12) . . ?
C1C N1C Ru2' 116.9(12) . . ?
C5C N1C Ru2' 127.5(12) . . ?
C1C N1C Ru2 132.2(12) . . ?
C5C N1C Ru2 112.8(12) . . ?
C10C C6C C7C 114.1(14) . . ?
C10C C6C C3C 125.7(13) . . ?
C7C C6C C3C 119.7(13) . . ?
C8C C7C C6C 122.1(16) . . ?
C7C C8C N2C 120.5(15) . . ?
C9C N2C C8C 119.8(13) . . ?
C9C N2C Ru1' 123.0(10) . . ?
C8C N2C Ru1' 117.0(10) . . ?
C9C N2C Ru1 122.8(10) . . ?
C8C N2C Ru1 117.1(10) . . ?
N2C C9C C10C 120.9(14) . . ?
C9C C10C C6C 122.1(14) . . ?
C1D N1D C5D 118(2) . . ?
C1D N1D Ru2 124.5(15) . . ?
C5D N1D Ru2 117(3) . . ?
N1D C1D C2D 120.0 . . ?
C3D C2D C1D 120.0 . . ?
C2D C3D C4D 120.0 . . ?
C2D C3D C6D 130(2) . . ?
C4D C3D C6D 106(2) . . ?
C3D C4D C5D 119(3) . . ?
C4D C5D N1D 123(4) . . ?
C7D C6D C10D 120.0 . . ?
C7D C6D C3D 112(3) . . ?
C10D C6D C3D 126(3) . . ?
C6D C7D C8D 120.0 . . ?
C7D C8D N2D 120.0 . . ?
C9D N2D C8D 120.0 . . ?
N2D C9D C10D 120.0 . . ?
C9D C10D C6D 120.0 . . ?
C1D' N1D' C5D' 111(3) . . ?
C1D' N1D' Ru2' 128(2) . . ?
C5D' N1D' Ru2' 121(2) . . ?
N1D' C1D' C2D' 133(3) . . ?
C3D' C2D' C1D' 112(4) . . ?
C2D' C3D' C4D' 128(4) . . ?
C2D' C3D' C6D' 105(3) . . ?
C4D' C3D' C6D' 126(3) . . ?
C3D' C4D' C5D' 110(4) . . ?
N1D' C5D' C4D' 125(4) . . ?
C7D' C6D' C10I 120.0 . . ?
C7D' C6D' C3D' 130(2) . . ?
C10I C6D' C3D' 108(2) . . ?
C6D' C7D' C8D' 120.0 . . ?
N2D' C8D' C7D' 120.0 . . ?
C9D' N2D' C8D' 120.0 . . ?
C10I C9D' N2D' 120.0 . . ?
C9D' C10I C6D' 120.0 . . ?
C5E N1E C1E 113(3) . . ?
C5E N1E Ru1' 129(2) . . ?
C1E N1E Ru1' 118.5(18) . . ?
C2E C1E N1E 125(3) . . ?
C1E C2E C3E 117(3) . . ?
C4E C3E C6E 143(3) . . ?
C4E C3E C2E 110(3) . . ?
C6E C3E C2E 103(3) . . ?
C3E C4E C5E 124(3) . . ?
N1E C5E C4E 131(3) . . ?
C7E C6E C10E 120.0 . . ?
C7E C6E C3E 105(2) . . ?
C10E C6E C3E 135(2) . . ?
C8E C7E C6E 120.0 . . ?
C7E C8E N2E 120.0 . . ?
C8E N2E C9E 120.0 . . ?
N2E C9E C10E 120.0 . . ?
C9E C10E C6E 120.0 . . ?
C5E' N1E' C1E' 118(4) . . ?
C5E' N1E' Ru1 121(3) . . ?
C1E' N1E' Ru1 121(3) . . ?
N1E' C1E' C2E' 123(4) . . ?
C1E' C2E' C3E' 107(3) . . ?
C4E' C3E' C2E' 130(4) . . ?
C4E' C3E' C6E' 137(4) . . ?
C2E' C3E' C6E' 94(4) . . ?
C3E' C4E' C5E' 119(4) . . ?
N1E' C5E' C4E' 123(4) . . ?
C10O C6E' C3E' 149(4) . . ?
C10O C6E' C7E' 104(4) . . ?
C3E' C6E' C7E' 105(3) . . ?
C8E' C7E' C6E' 126(3) . . ?
N2E' C8E' C7E' 112(4) . . ?
C8E' N2E' C9E' 122(4) . . ?
C10O C9E' N2E' 120(4) . . ?
C6E' C10O C9E' 134(4) . . ?
N1T C1T C2T 162(5) . . ?
N1U C1U C2U 167(7) . . ?
N1V C1V C2V 157(5) . . ?
N1W C1W C2W 167(7) . . ?
 
loop_
 _geom_torsion_atom_site_label_1
 _geom_torsion_atom_site_label_2
 _geom_torsion_atom_site_label_3
 _geom_torsion_atom_site_label_4
 _geom_torsion
 _geom_torsion_site_symmetry_1
 _geom_torsion_site_symmetry_2
 _geom_torsion_site_symmetry_3
 _geom_torsion_site_symmetry_4
 _geom_torsion_publ_flag
C5A N1A C1A C2A 15(5) . . . . ?
Ru1 N1A C1A C2A 172(3) . . . . ?
C5A N1A C1A C16A -163(3) . . . . ?
Ru1 N1A C1A C16A -7(4) . . . . ?
N1A C1A C2A C3A 0(5) . . . . ?
C16A C1A C2A C3A 177(4) . . . . ?
C1A C2A C3A C4A -6(5) . . . . ?
C2A C3A C4A C5A 0(5) . . . . ?
C3A C4A C5A N1A 13(5) . . . . ?
C3A C4A C5A C6A 169(3) . . . . ?
C1A N1A C5A C4A -22(5) . . . . ?
Ru1 N1A C5A C4A -178(3) . . . . ?
C1A N1A C5A C6A 178(3) . . . . ?
Ru1 N1A C5A C6A 23(4) . . . . ?
C10A N2A C6A C7A 3(5) . . . . ?
Ru1 N2A C6A C7A -172(3) . . . . ?
C10A N2A C6A C5A -173(2) . . . . ?
Ru1 N2A C6A C5A 13(3) . . . . ?
C4A C5A C6A C7A 4(5) . . . . ?
N1A C5A C6A C7A 162(3) . . . . ?
C4A C5A C6A N2A -179(3) . . . . ?
N1A C5A C6A N2A -22(4) . . . . ?
N2A C6A C7A C8A -1(5) . . . . ?
C5A C6A C7A C8A 174(2) . . . . ?
C6A C7A C8A C9A -2(5) . . . . ?
C7A C8A C9A C10A 2(6) . . . . ?
C6A N2A C10A C11A 173(3) . . . . ?
Ru1 N2A C10A C11A -12(3) . . . . ?
C6A N2A C10A C9A -3(4) . . . . ?
Ru1 N2A C10A C9A 172(2) . . . . ?
C8A C9A C10A N2A 1(5) . . . . ?
C8A C9A C10A C11A -175(3) . . . . ?
N2A C10A C11A C12A -171(3) . . . . ?
C9A C10A C11A C12A 4(5) . . . . ?
N2A C10A C11A N3A 10(3) . . . . ?
C9A C10A C11A N3A -174(3) . . . . ?
C15A N3A C11A C12A 3(4) . . . . ?
Ru1 N3A C11A C12A 176(3) . . . . ?
C15A N3A C11A C10A -179(3) . . . . ?
Ru1 N3A C11A C10A -6(3) . . . . ?
C10A C11A C12A C13A 173(3) . . . . ?
N3A C11A C12A C13A -9(5) . . . . ?
C11A C12A C13A C14A 12(6) . . . . ?
C12A C13A C14A C15A -9(6) . . . . ?
C11A N3A C15A C14A 0(4) . . . . ?
Ru1 N3A C15A C14A -171(3) . . . . ?
C11A N3A C15A C17A -180(3) . . . . ?
Ru1 N3A C15A C17A 10(5) . . . . ?
C13A C14A C15A N3A 3(6) . . . . ?
C13A C14A C15A C17A -177(3) . . . . ?
N1A C1A C16A O4A -176(3) . . . . ?
C2A C1A C16A O4A 6(6) . . . . ?
N1A C1A C16A O3A -2(5) . . . . ?
C2A C1A C16A O3A -180(4) . . . . ?
O4A C16A O3A Ru1 -178(3) . . . . ?
C1A C16A O3A Ru1 9(4) . . . . ?
N3A C15A C17A O1A -92(4) . . . . ?
C14A C15A C17A O1A 88(4) . . . . ?
N3A C15A C17A O2A 58(5) . . . . ?
C14A C15A C17A O2A -122(4) . . . . ?
C5A' N1A' C1A' C2A' 1(6) . . . . ?
Ru1' N1A' C1A' C2A' -179(4) . . . . ?
C5A' N1A' C1A' C16' 177(3) . . . . ?
Ru1' N1A' C1A' C16' -3(6) . . . . ?
N1A' C1A' C2A' C3A' -2(7) . . . . ?
C16' C1A' C2A' C3A' -177(4) . . . . ?
C1A' C2A' C3A' C4A' -2(6) . . . . ?
C2A' C3A' C4A' C5A' 7(5) . . . . ?
C3A' C4A' C5A' C6A' 171(3) . . . . ?
C3A' C4A' C5A' N1A' -8(5) . . . . ?
C1A' N1A' C5A' C4A' 4(5) . . . . ?
Ru1' N1A' C5A' C4A' -176(3) . . . . ?
C1A' N1A' C5A' C6A' -175(3) . . . . ?
Ru1' N1A' C5A' C6A' 5(3) . . . . ?
C10' N2A' C6A' C5A' -178(4) . . . . ?
Ru1' N2A' C6A' C5A' 8(4) . . . . ?
C10' N2A' C6A' C7A' -9(6) . . . . ?
Ru1' N2A' C6A' C7A' 178(2) . . . . ?
C4A' C5A' C6A' N2A' 172(4) . . . . ?
N1A' C5A' C6A' N2A' -9(4) . . . . ?
C4A' C5A' C6A' C7A' 2(5) . . . . ?
N1A' C5A' C6A' C7A' -179(3) . . . . ?
N2A' C6A' C7A' C8A' -1(5) . . . . ?
C5A' C6A' C7A' C8A' 169(3) . . . . ?
C6A' C7A' C8A' C9' 10(5) . . . . ?
C7A' C8A' C9' C10' -11(6) . . . . ?
C6A' N2A' C10' C9' 9(6) . . . . ?
Ru1' N2A' C10' C9' -178(2) . . . . ?
C6A' N2A' C10' C11' 175(3) . . . . ?
Ru1' N2A' C10' C11' -12(4) . . . . ?
C8A' C9' C10' N2A' 1(6) . . . . ?
C8A' C9' C10' C11' -164(4) . . . . ?
C15' N3A' C11' C12' 0(6) . . . . ?
Ru1' N3A' C11' C12' 172(3) . . . . ?
C15' N3A' C11' C10' -172(3) . . . . ?
Ru1' N3A' C11' C10' -1(4) . . . . ?
N2A' C10' C11' C12' -164(4) . . . . ?
C9' C10' C11' C12' 2(6) . . . . ?
N2A' C10' C11' N3A' 8(5) . . . . ?
C9' C10' C11' N3A' 173(3) . . . . ?
N3A' C11' C12' C13' 4(6) . . . . ?
C10' C11' C12' C13' 175(3) . . . . ?
C11' C12' C13' C14' -5(5) . . . . ?
C12' C13' C14' C15' 3(5) . . . . ?
C13' C14' C15' N3A' 0(6) . . . . ?
C13' C14' C15' C17' 146(4) . . . . ?
C11' N3A' C15' C14' -2(6) . . . . ?
Ru1' N3A' C15' C14' -173(3) . . . . ?
C11' N3A' C15' C17' -161(3) . . . . ?
Ru1' N3A' C15' C17' 28(3) . . . . ?
N1A' C1A' C16' O2K' 172(4) . . . . ?
C2A' C1A' C16' O2K' -12(6) . . . . ?
N1A' C1A' C16' O1K' -4(5) . . . . ?
C2A' C1A' C16' O1K' 172(4) . . . . ?
O2K' C16' O1K' Ru1' -169(4) . . . . ?
C1A' C16' O1K' Ru1' 7(4) . . . . ?
C14' C15' C17' O3K' 156(5) . . . . ?
N3A' C15' C17' O3K' -54(4) . . . . ?
C14' C15' C17' O4K' -31(5) . . . . ?
N3A' C15' C17' O4K' 119(3) . . . . ?
O4K' C17' O3K' Ru1' -128(3) . . . . ?
C15' C17' O3K' Ru1' 43(3) . . . . ?
N3B Ru2 N1B C5B 1(5) . . . . ?
N2B Ru2 N1B C5B 5(3) . . . . ?
N1D Ru2 N1B C5B -87(3) . . . . ?
N1C Ru2 N1B C5B 96(3) . . . . ?
O1B Ru2 N1B C5B -171(2) . . . . ?
N3B Ru2 N1B C1B 177(3) . . . . ?
N2B Ru2 N1B C1B -179(4) . . . . ?
N1D Ru2 N1B C1B 89(4) . . . . ?
N1C Ru2 N1B C1B -87(4) . . . . ?
O1B Ru2 N1B C1B 5(4) . . . . ?
C5B N1B C1B C2B 5(5) . . . . ?
Ru2 N1B C1B C2B -172(3) . . . . ?
C5B N1B C1B C17B 173(3) . . . . ?
Ru2 N1B C1B C17B -4(5) . . . . ?
C17B C1B C2B C3B -174(3) . . . . ?
N1B C1B C2B C3B -6(7) . . . . ?
C1B C2B C3B C4B -1(5) . . . . ?
C2B C3B C4B C5B 6(5) . . . . ?
C1B N1B C5B C4B 3(5) . . . . ?
Ru2 N1B C5B C4B -180(3) . . . . ?
C1B N1B C5B C6B 174(3) . . . . ?
Ru2 N1B C5B C6B -9(3) . . . . ?
C3B C4B C5B N1B -9(6) . . . . ?
C3B C4B C5B C6B -178(3) . . . . ?
C10B N2B C6B C7B 2(5) . . . . ?
Ru2 N2B C6B C7B 179(3) . . . . ?
C10B N2B C6B C5B 176(3) . . . . ?
Ru2 N2B C6B C5B -6(4) . . . . ?
N1B C5B C6B N2B 9(4) . . . . ?
C4B C5B C6B N2B -178(3) . . . . ?
N1B C5B C6B C7B -176(3) . . . . ?
C4B C5B C6B C7B -4(5) . . . . ?
N2B C6B C7B C8B -3(5) . . . . ?
C5B C6B C7B C8B -177(3) . . . . ?
C6B C7B C8B C9B 3(5) . . . . ?
C7B C8B C9B C10B -1(5) . . . . ?
C6B N2B C10B C9B 0(4) . . . . ?
Ru2 N2B C10B C9B -177(2) . . . . ?
C6B N2B C10B C11B -178(3) . . . . ?
Ru2 N2B C10B C11B 4(3) . . . . ?
C8B C9B C10B N2B 0(5) . . . . ?
C8B C9B C10B C11B 177(4) . . . . ?
C15B N3B C11B C12B -4(6) . . . . ?
Ru2 N3B C11B C12B -179(3) . . . . ?
C15B N3B C11B C10B 176(3) . . . . ?
Ru2 N3B C11B C10B 0(4) . . . . ?
N2B C10B C11B N3B -3(4) . . . . ?
C9B C10B C11B N3B 179(100) . . . . ?
N2B C10B C11B C12B 177(3) . . . . ?
C9B C10B C11B C12B -1(6) . . . . ?
N3B C11B C12B C13B 10(6) . . . . ?
C10B C11B C12B C13B -170(3) . . . . ?
C11B C12B C13B C14B -13(5) . . . . ?
C12B C13B C14B C15B 11(4) . . . . ?
C13B C14B C15B N3B -7(5) . . . . ?
C13B C14B C15B C16B 173(3) . . . . ?
C11B N3B C15B C14B 2(6) . . . . ?
Ru2 N3B C15B C14B 178(3) . . . . ?
C11B N3B C15B C16B -178(3) . . . . ?
Ru2 N3B C15B C16B -2(4) . . . . ?
C14B C15B C16B O1B 178(4) . . . . ?
N3B C15B C16B O1B -2(5) . . . . ?
C14B C15B C16B O2B -6(6) . . . . ?
N3B C15B C16B O2B 174(3) . . . . ?
O2B C16B O1B Ru2 -170(4) . . . . ?
C15B C16B O1B Ru2 5(5) . . . . ?
C2B C1B C17B O4B -91(5) . . . . ?
N1B C1B C17B O4B 99(4) . . . . ?
C2B C1B C17B O3B 92(6) . . . . ?
N1B C1B C17B O3B -78(5) . . . . ?
N2B' Ru2' N1B' C5B' -2(3) . . . . ?
N3B" Ru2' N1B' C5B' -10(5) . . . . ?
N1C Ru2' N1B' C5B' 87(3) . . . . ?
N1D' Ru2' N1B' C5B' -96(3) . . . . ?
O3B' Ru2' N1B' C5B' 175(3) . . . . ?
N2B' Ru2' N1B' C1B' -175(2) . . . . ?
N3B" Ru2' N1B' C1B' 177(2) . . . . ?
N1C Ru2' N1B' C1B' -85(2) . . . . ?
N1D' Ru2' N1B' C1B' 92(2) . . . . ?
O3B' Ru2' N1B' C1B' 2.7(19) . . . . ?
C5B' N1B' C1B' C2B' 0(4) . . . . ?
Ru2' N1B' C1B' C2B' 173(2) . . . . ?
C5B' N1B' C1B' C17" -177(3) . . . . ?
Ru2' N1B' C1B' C17" -4(3) . . . . ?
C17" C1B' C2B' C3B' -179(3) . . . . ?
N1B' C1B' C2B' C3B' 4(4) . . . . ?
C1B' C2B' C3B' C4B' -2(4) . . . . ?
C2B' C3B' C4B' C5B' -5(4) . . . . ?
C1B' N1B' C5B' C4B' -7(4) . . . . ?
Ru2' N1B' C5B' C4B' -179(2) . . . . ?
C1B' N1B' C5B' C6B' 177(2) . . . . ?
Ru2' N1B' C5B' C6B' 4(3) . . . . ?
C3B' C4B' C5B' N1B' 10(4) . . . . ?
C3B' C4B' C5B' C6B' -175(3) . . . . ?
N1B' Ru2' N2B' C10" -175(2) . . . . ?
N3B" Ru2' N2B' C10" 2(2) . . . . ?
N1C Ru2' N2B' C10" 85(2) . . . . ?
N1D' Ru2' N2B' C10" -87(2) . . . . ?
O3B' Ru2' N2B' C10" 176(2) . . . . ?
N1B' Ru2' N2B' C6B' -1.1(19) . . . . ?
N3B" Ru2' N2B' C6B' 176(2) . . . . ?
N1C Ru2' N2B' C6B' -100.5(19) . . . . ?
N1D' Ru2' N2B' C6B' 88(2) . . . . ?
O3B' Ru2' N2B' C6B' -10(4) . . . . ?
C10" N2B' C6B' C7B' -10(4) . . . . ?
Ru2' N2B' C6B' C7B' 175(2) . . . . ?
C10" N2B' C6B' C5B' 178(2) . . . . ?
Ru2' N2B' C6B' C5B' 4(3) . . . . ?
N1B' C5B' C6B' N2B' -5(3) . . . . ?
C4B' C5B' C6B' N2B' 179(3) . . . . ?
N1B' C5B' C6B' C7B' -177(2) . . . . ?
C4B' C5B' C6B' C7B' 7(4) . . . . ?
N2B' C6B' C7B' C8B' 6(4) . . . . ?
C5B' C6B' C7B' C8B' 177(2) . . . . ?
C6B' C7B' C8B' C9B' 4(4) . . . . ?
C7B' C8B' C9B' C10" -9(5) . . . . ?
C6B' N2B' C10" C9B' 5(3) . . . . ?
Ru2' N2B' C10" C9B' 179(2) . . . . ?
C6B' N2B' C10" C11" -171(2) . . . . ?
Ru2' N2B' C10" C11" 3(3) . . . . ?
C8B' C9B' C10" N2B' 4(4) . . . . ?
C8B' C9B' C10" C11" 178(3) . . . . ?
C15" N3B" C11" C12" -8(4) . . . . ?
Ru2' N3B" C11" C12" -176(3) . . . . ?
C15" N3B" C11" C10" 177(2) . . . . ?
Ru2' N3B" C11" C10" 9(3) . . . . ?
N2B' C10" C11" C12" 177(2) . . . . ?
C9B' C10" C11" C12" 2(5) . . . . ?
N2B' C10" C11" N3B" -7(3) . . . . ?
C9B' C10" C11" N3B" 178(3) . . . . ?
N3B" C11" C12" C13" 4(5) . . . . ?
C10" C11" C12" C13" 179(2) . . . . ?
C11" C12" C13" C14" 1(4) . . . . ?
C12" C13" C14" C15" 0(4) . . . . ?
C11" N3B" C15" C14" 9(4) . . . . ?
Ru2' N3B" C15" C14" 172(2) . . . . ?
C11" N3B" C15" C16" -179(3) . . . . ?
Ru2' N3B" C15" C16" -16(4) . . . . ?
C13" C14" C15" N3B" -6(5) . . . . ?
C13" C14" C15" C16" -178(3) . . . . ?
N3B" C15" C16" O1B' -83(4) . . . . ?
C14" C15" C16" O1B' 91(4) . . . . ?
N3B" C15" C16" O2B' 101(3) . . . . ?
C14" C15" C16" O2B' -86(4) . . . . ?
C2B' C1B' C17" O4B' 12(5) . . . . ?
N1B' C1B' C17" O4B' -171(3) . . . . ?
C2B' C1B' C17" O3B' -174(3) . . . . ?
N1B' C1B' C17" O3B' 3(4) . . . . ?
O4B' C17" O3B' Ru2' 172(3) . . . . ?
C1B' C17" O3B' Ru2' -1(3) . . . . ?
N1C C1C C2C C3C -2(3) . . . . ?
C1C C2C C3C C4C -1(3) . . . . ?
C1C C2C C3C C6C 178.5(15) . . . . ?
C2C C3C C4C C5C 1(3) . . . . ?
C6C C3C C4C C5C -179.4(16) . . . . ?
C3C C4C C5C N1C 4(3) . . . . ?
C2C C1C N1C C5C 7(3) . . . . ?
C2C C1C N1C Ru2' 178.1(13) . . . . ?
C2C C1C N1C Ru2 -169.7(12) . . . . ?
C4C C5C N1C C1C -7(2) . . . . ?
C4C C5C N1C Ru2' -177.5(12) . . . . ?
C4C C5C N1C Ru2 170.0(12) . . . . ?
C2C C3C C6C C10C 135(2) . . . . ?
C4C C3C C6C C10C -45(3) . . . . ?
C2C C3C C6C C7C -36(3) . . . . ?
C4C C3C C6C C7C 144(2) . . . . ?
C10C C6C C7C C8C 8(3) . . . . ?
C3C C6C C7C C8C 180(2) . . . . ?
C6C C7C C8C N2C -8(3) . . . . ?
C7C C8C N2C C9C 3(3) . . . . ?
C7C C8C N2C Ru1' 177.4(15) . . . . ?
C7C C8C N2C Ru1 -170.0(15) . . . . ?
C8C N2C C9C C10C 1(3) . . . . ?
Ru1' N2C C9C C10C -173.2(14) . . . . ?
Ru1 N2C C9C C10C 173.5(14) . . . . ?
N2C C9C C10C C6C 0(3) . . . . ?
C7C C6C C10C C9C -4(3) . . . . ?
C3C C6C C10C C9C -176(2) . . . . ?
C5D N1D C1D C2D 1(3) . . . . ?
Ru2 N1D C1D C2D -170(2) . . . . ?
N1D C1D C2D C3D 0.0 . . . . ?
C1D C2D C3D C4D 0.0 . . . . ?
C1D C2D C3D C6D -156(3) . . . . ?
C2D C3D C4D C5D -1(3) . . . . ?
C6D C3D C4D C5D 159(4) . . . . ?
C3D C4D C5D N1D 3(6) . . . . ?
C1D N1D C5D C4D -3(6) . . . . ?
Ru2 N1D C5D C4D 169(3) . . . . ?
C2D C3D C6D C7D -108(3) . . . . ?
C4D C3D C6D C7D 94(2) . . . . ?
C2D C3D C6D C10D 55(4) . . . . ?
C4D C3D C6D C10D -103(3) . . . . ?
C10D C6D C7D C8D 0.0 . . . . ?
C3D C6D C7D C8D 164(3) . . . . ?
C6D C7D C8D N2D 0.0 . . . . ?
C7D C8D N2D C9D 0.0 . . . . ?
C8D N2D C9D C10D 0.0 . . . . ?
N2D C9D C10D C6D 0.0 . . . . ?
C7D C6D C10D C9D 0.0 . . . . ?
C3D C6D C10D C9D -162(3) . . . . ?
C5D' N1D' C1D' C2D' -3(6) . . . . ?
Ru2' N1D' C1D' C2D' -174(3) . . . . ?
N1D' C1D' C2D' C3D' 5(6) . . . . ?
C1D' C2D' C3D' C4D' 1(6) . . . . ?
C1D' C2D' C3D' C6D' -165(3) . . . . ?
C2D' C3D' C4D' C5D' -6(6) . . . . ?
C6D' C3D' C4D' C5D' 157(3) . . . . ?
C1D' N1D' C5D' C4D' -5(5) . . . . ?
Ru2' N1D' C5D' C4D' 167(3) . . . . ?
C3D' C4D' C5D' N1D' 8(5) . . . . ?
C2D' C3D' C6D' C7D' 94(4) . . . . ?
C4D' C3D' C6D' C7D' -72(5) . . . . ?
C2D' C3D' C6D' C10I -103(3) . . . . ?
C4D' C3D' C6D' C10I 91(4) . . . . ?
C10I C6D' C7D' C8D' 0.0 . . . . ?
C3D' C6D' C7D' C8D' 162(3) . . . . ?
C6D' C7D' C8D' N2D' 0.0 . . . . ?
C7D' C8D' N2D' C9D' 0.0 . . . . ?
C8D' N2D' C9D' C10I 0.0 . . . . ?
N2D' C9D' C10I C6D' 0.0 . . . . ?
C7D' C6D' C10I C9D' 0.0 . . . . ?
C3D' C6D' C10I C9D' -166(3) . . . . ?
C5E N1E C1E C2E -1(4) . . . . ?
Ru1' N1E C1E C2E -178(2) . . . . ?
N1E C1E C2E C3E -3(4) . . . . ?
C1E C2E C3E C4E 8(4) . . . . ?
C1E C2E C3E C6E 170(3) . . . . ?
C6E C3E C4E C5E -159(4) . . . . ?
C2E C3E C4E C5E -10(4) . . . . ?
C1E N1E C5E C4E 0(5) . . . . ?
Ru1' N1E C5E C4E 177(2) . . . . ?
C3E C4E C5E N1E 6(6) . . . . ?
C4E C3E C6E C7E -56(6) . . . . ?
C2E C3E C6E C7E 153.2(17) . . . . ?
C4E C3E C6E C10E 118(6) . . . . ?
C2E C3E C6E C10E -32(3) . . . . ?
C10E C6E C7E C8E 0.0 . . . . ?
C3E C6E C7E C8E 176(2) . . . . ?
C6E C7E C8E N2E 0.0 . . . . ?
C7E C8E N2E C9E 0.0 . . . . ?
C8E N2E C9E C10E 0.0 . . . . ?
N2E C9E C10E C6E 0.0 . . . . ?
C7E C6E C10E C9E 0.0 . . . . ?
C3E C6E C10E C9E -174(3) . . . . ?
C5E' N1E' C1E' C2E' 0(6) . . . . ?
Ru1 N1E' C1E' C2E' -179(3) . . . . ?
N1E' C1E' C2E' C3E' -2(5) . . . . ?
C1E' C2E' C3E' C4E' 2(7) . . . . ?
C1E' C2E' C3E' C6E' -179(3) . . . . ?
C2E' C3E' C4E' C5E' 1(8) . . . . ?
C6E' C3E' C4E' C5E' -177(4) . . . . ?
C1E' N1E' C5E' C4E' 3(6) . . . . ?
Ru1 N1E' C5E' C4E' -177(3) . . . . ?
C3E' C4E' C5E' N1E' -4(7) . . . . ?
C4E' C3E' C6E' C10O 115(9) . . . . ?
C2E' C3E' C6E' C10O -64(8) . . . . ?
C4E' C3E' C6E' C7E' -45(7) . . . . ?
C2E' C3E' C6E' C7E' 136(3) . . . . ?
C10O C6E' C7E' C8E' 6(5) . . . . ?
C3E' C6E' C7E' C8E' 175(4) . . . . ?
C6E' C7E' C8E' N2E' -9(6) . . . . ?
C7E' C8E' N2E' C9E' 10(6) . . . . ?
C8E' N2E' C9E' C10O -9(7) . . . . ?
C3E' C6E' C10O C9E' -164(6) . . . . ?
C7E' C6E' C10O C9E' -5(7) . . . . ?
N2E' C9E' C10O C6E' 7(8) . . . . ?
 
_refine_diff_density_max    2.700
_refine_diff_density_min   -1.094
_refine_diff_density_rms    0.219

_shelx_res_file
;
TITL mo_AH95dimer_0m in C2/c
    mo_AH95dimer_0m.res
    created by SHELXL-2018/3 at 13:37:21 on 22-Jul-2019
CELL 0.71073  52.28310   9.29180  26.10440  90.0000  90.7004  90.0000
ZERR    8.00   0.00640   0.00100   0.00330   0.0000   0.0042   0.0000
LATT 7
SYMM -X, Y, 0.5-Z
SFAC C  H  N  O  Ru
UNIT 530.644 446.145 105.322 105.09 16
LIST 4
L.S. 90
ACTA
BOND
FMAP 2
PLAN 20
SIZE 0.010 0.100 0.200
CONF
OMIT 2 0 0
OMIT -12 2 5
OMIT 2 2 13
OMIT 1 1 11
OMIT 1 1 15
OMIT -3 1 6
TEMP -173.170
TWIN -1 0 0 0 1 0 0 0 1
REM DAMP 50
WGHT    0.100000
BASF   0.33071
FVAR       0.04242   0.52109   0.44994   0.44233   0.45645   0.33124
MOLE 1
PART 0
PART 1 21.00000
SIMU 0.01 RU1 > O4K'
DELU 0.01 RU1 > O4K'
ISOR 0.005 RU1 > O4K'
DFIX 1.52 0.02 C1A  C16A
DFIX 1.52 0.02 C1A' C16'
DFIX 1.52 0.02 C15A C17A
DFIX 1.52 0.02 C15' C17'
DFIX 2.08 0.03 RU1 N1A
DFIX 2.08 0.03 RU1' N1A'
DFIX 2.08 0.03 RU1 N3A
DFIX 2.08 0.03 RU1' N3A'
RU1   5    0.173717   -0.041366    0.621404    21.00000    0.03129    0.01162 =
         0.06015   -0.00234    0.00365    0.00441
N1A   3    0.175657   -0.081294    0.544906    21.00000    0.04201    0.04387 =
         0.04688   -0.00220    0.00098    0.00233
C1A   1    0.181351    0.037486    0.517877    21.00000    0.04803    0.04841 =
         0.04844   -0.00057    0.00154    0.00120
C2A   1    0.186282    0.013497    0.466730    21.00000    0.04889    0.04715 =
         0.04847   -0.00105    0.00275   -0.00019
AFIX  43
H2A   2    0.190337    0.091515    0.444756    21.00000   -1.20000
AFIX   0
C3A   1    0.185288   -0.119457    0.448725    21.00000    0.04995    0.04834 =
         0.04863   -0.00054    0.00320   -0.00037
AFIX  43
H3A   2    0.186971   -0.136556    0.413045    21.00000   -1.20000
AFIX   0
C4A   1    0.181639   -0.238594    0.483407    21.00000    0.04599    0.04604 =
         0.04658   -0.00214    0.00161    0.00115
AFIX  43
H4A   2    0.180833   -0.334246    0.470636    21.00000   -1.20000
AFIX   0
C5A   1    0.179540   -0.215072    0.530489    21.00000    0.04452    0.04408 =
         0.04548   -0.00113    0.00015    0.00056
N2A   3    0.170946   -0.252619    0.620605    21.00000    0.03973    0.03627 =
         0.04620   -0.00067    0.00237    0.00108
C6A   1    0.170819   -0.324970    0.575225    21.00000    0.04296    0.04162 =
         0.04455   -0.00203   -0.00020    0.00146
C7A   1    0.166499   -0.463563    0.562853    21.00000    0.04600    0.04383 =
         0.04595   -0.00170    0.00016    0.00183
AFIX  43
H7A   2    0.166610   -0.505243    0.529625    21.00000   -1.20000
AFIX   0
C8A   1    0.161314   -0.540560    0.614240    21.00000    0.04716    0.04470 =
         0.04789   -0.00012    0.00109   -0.00157
AFIX  43
H8A   2    0.157300   -0.639936    0.611216    21.00000   -1.20000
AFIX   0
C9A   1    0.161527   -0.496803    0.655833    21.00000    0.04431    0.04400 =
         0.04511    0.00239    0.00182    0.00029
AFIX  43
H9A   2    0.158527   -0.556347    0.684727    21.00000   -1.20000
AFIX   0
C10A  1    0.166993   -0.336493    0.660487    21.00000    0.04374    0.04165 =
         0.04489    0.00149    0.00197   -0.00037
N3A   3    0.172850   -0.084827    0.693912    21.00000    0.04409    0.04271 =
         0.05245   -0.00339    0.00030    0.00427
C11A  1    0.170655   -0.249867    0.707564    21.00000    0.04492    0.04518 =
         0.04724    0.00114    0.00014    0.00119
C12A  1    0.171362   -0.298203    0.755245    21.00000    0.04921    0.04866 =
         0.04902    0.00124    0.00134    0.00030
AFIX  43
H12A  2    0.167325   -0.396613    0.760804    21.00000   -1.20000
AFIX   0
C13A  1    0.177283   -0.219053    0.795466    21.00000    0.05149    0.05060 =
         0.05038    0.00013    0.00109    0.00126
AFIX  43
H13A  2    0.180736   -0.263825    0.827529    21.00000   -1.20000
AFIX   0
C14A  1    0.178433   -0.078304    0.791410    21.00000    0.05244    0.05203 =
         0.05234   -0.00078    0.00057   -0.00009
AFIX  43
H14A  2    0.180271   -0.020447    0.821234    21.00000   -1.20000
AFIX   0
C15A  1    0.176893   -0.011796    0.741464    21.00000    0.05299    0.05227 =
         0.05421   -0.00063   -0.00001    0.00009
DFIX 1.23 0.02 C16A O3A
DFIX 1.23 0.02 C16A O4A
DFIX 1.23 0.02 C17A O1A
DFIX 1.23 0.02 C17A O2A
DFIX 2.22 0.03 O3A O4A
DFIX 2.22 0.03 O1A O2A
C16A  1    0.181863    0.175941    0.550912    21.00000    0.05469    0.04912 =
         0.05268   -0.00048    0.00080   -0.00111
O3A   4    0.176520    0.174744    0.599671    21.00000    0.05590    0.04603 =
         0.05441   -0.00074   -0.00274    0.00060
O4A   4    0.185570    0.281927    0.525026    21.00000    0.07730    0.06161 =
         0.05689   -0.00309    0.00254   -0.00606
C17A  1    0.179463    0.151389    0.736264    21.00000    0.06205    0.05650 =
         0.05913   -0.00156   -0.00116    0.00136
O1A   4    0.201532    0.201222    0.731481    21.00000    0.06377    0.04581 =
         0.05973   -0.00248    0.02188    0.00076
O2A   4    0.161594    0.224665    0.715716    21.00000    0.08909    0.07721 =
         0.08830    0.00358   -0.01232    0.01499
PART 2 -21.00000
RU1'  5    0.176358   -0.035090    0.637234   -21.00000    0.03365    0.02168 =
         0.05467   -0.00003   -0.00127    0.00490
N1A'  3    0.176801   -0.070209    0.563984   -21.00000    0.03836    0.04060 =
         0.05013    0.00322    0.00035    0.00284
C1A'  1    0.177673   -0.010360    0.521618   -21.00000    0.04615    0.04658 =
         0.04792   -0.00096    0.00099    0.00115
C2A'  1    0.177304   -0.067512    0.473099   -21.00000    0.04704    0.04743 =
         0.04828   -0.00029    0.00270    0.00107
AFIX  43
H2A'  2    0.177603   -0.002319    0.445079   -21.00000   -1.20000
AFIX   0
C3A'  1    0.176535   -0.211680    0.462142   -21.00000    0.04735    0.04592 =
         0.04649   -0.00052    0.00245    0.00098
AFIX  43
H3A'  2    0.175761   -0.246493    0.427941   -21.00000   -1.20000
AFIX   0
C4A'  1    0.177019   -0.317902    0.510397   -21.00000    0.04555    0.04468 =
         0.04484   -0.00082    0.00127    0.00108
AFIX  43
H4A'  2    0.178313   -0.419381    0.506834   -21.00000   -1.20000
AFIX   0
C5A'  1    0.175514   -0.255431    0.554834   -21.00000    0.04093    0.04198 =
         0.04480   -0.00123    0.00061    0.00105
N2A'  3    0.173753   -0.250888    0.649136   -21.00000    0.04113    0.04102 =
         0.04515    0.00000    0.00119    0.00115
C6A'  1    0.172067   -0.323397    0.605186   -21.00000    0.04208    0.04038 =
         0.04424   -0.00111    0.00134    0.00023
C7A'  1    0.170861   -0.482250    0.605147   -21.00000    0.04467    0.04304 =
         0.04528   -0.00041    0.00190   -0.00027
AFIX  43
H7A'  2    0.169407   -0.541415    0.575575   -21.00000   -1.20000
AFIX   0
C8A'  1    0.172250   -0.532699    0.657208   -21.00000    0.04498    0.04386 =
         0.04522    0.00119    0.00182    0.00035
AFIX  43
H8A'  2    0.174347   -0.632706    0.663553   -21.00000   -1.20000
AFIX   0
C9'   1    0.170732   -0.446284    0.695115   -21.00000    0.04539    0.04389 =
         0.04650    0.00122    0.00237    0.00080
AFIX  43
H9'   2    0.168817   -0.485498    0.728457   -21.00000   -1.20000
AFIX   0
C10'  1    0.171748   -0.298383    0.689864   -21.00000    0.04361    0.04290 =
         0.04621    0.00156    0.00119    0.00127
N3A'  3    0.179257   -0.058315    0.715226   -21.00000    0.04815    0.04832 =
         0.05029   -0.00174   -0.00028    0.00297
C11'  1    0.176694   -0.191139    0.732489   -21.00000    0.04828    0.04698 =
         0.04889   -0.00009    0.00087    0.00173
C12'  1    0.181396   -0.219194    0.781291   -21.00000    0.05090    0.05025 =
         0.05048    0.00045    0.00045    0.00098
AFIX  43
H12'  2    0.180442   -0.316291    0.792505   -21.00000   -1.20000
AFIX   0
C13'  1    0.188152   -0.105743    0.819812   -21.00000    0.05242    0.05280 =
         0.05322   -0.00083   -0.00036    0.00034
AFIX  43
H13'  2    0.190353   -0.122415    0.855499   -21.00000   -1.20000
AFIX   0
C14'  1    0.190710    0.024755    0.796654   -21.00000    0.05366    0.05247 =
         0.05273   -0.00246    0.00157    0.00025
AFIX  43
H14'  2    0.195758    0.103871    0.817493   -21.00000   -1.20000
AFIX   0
FLAT  C15' C17' O3K' O4K'
C15'  1    0.186643    0.049785    0.746762   -21.00000    0.05462    0.05195 =
         0.05446   -0.00225    0.00007    0.00019
DFIX 1.23 0.02 C16' O1K'
DFIX 1.23 0.02 C16' O2K'
DFIX 1.23 0.02 C17' O3K'
DFIX 1.23 0.02 C17' O4K'
DFIX 2.22 0.03 O1K' O2K'
DFIX 2.22 0.03 O3K' O4K'
C16'  1    0.177227    0.152506    0.533217   -21.00000    0.05468    0.04901 =
         0.05136    0.00133   -0.00142    0.00120
O1K'  4    0.174679    0.174641    0.581029   -21.00000    0.05893    0.04918 =
         0.05566    0.00002   -0.00026    0.00148
O2K'  4    0.180567    0.241361    0.500256   -21.00000    0.07226    0.06183 =
         0.06365    0.00300   -0.00960   -0.00658
C17'  1    0.176678    0.166827    0.710825   -21.00000    0.06341    0.05798 =
         0.05974   -0.00183   -0.00079    0.00236
O3K'  4    0.179456    0.199427    0.666146   -21.00000    0.06595    0.05240 =
         0.06057   -0.00069    0.00174    0.00078
O4K'  4    0.161176    0.215156    0.743420   -21.00000    0.07989    0.07472 =
         0.06427    0.00105    0.00330    0.01155
MOLE 2
PART 1  31.00000
SIMU 0.02 RU2 > O4B'
DELU 0.02 RU2 > O4B'
ISOR 0.01 RU2 > O4B'
DFIX 1.52 0.02 C1B C17B
DFIX 1.52 0.02 C1B' C17"
DFIX 1.52 0.02 C15" C16"
DFIX 1.52 0.02 C15B C16B
RU2   5    0.391311    0.041143    0.634975    31.00000    0.03310    0.01730 =
         0.03917    0.00229    0.00289    0.00020
N1B   3    0.390208    0.090813    0.565351    31.00000    0.03220    0.03758 =
         0.03338   -0.00478   -0.00667    0.00146
DFIX 1.39 0.02 C1B C2B
REM DFIX -2.27 0.02 C1B C17B
DFIX -2.27 0.02 C1B C5B
DFIX 1.25 0.03 C17B O4B
DFIX 1.25 0.03 C17B O3B
DFIX 1.39 C5B N1B
C1B   1    0.391167    0.017486    0.511600    31.00000    0.04273    0.04348 =
         0.04499   -0.00246    0.00388   -0.00301
C2B   1    0.392777    0.066124    0.461920    31.00000    0.04286    0.04370 =
         0.04612   -0.00192    0.00392   -0.00449
AFIX   3
H2B   2    0.392345    0.005091    0.417952    31.00000   -1.20000
AFIX   0
C3B   1    0.391656    0.215751    0.449257    31.00000    0.04860    0.04297 =
         0.05094   -0.00144    0.00298   -0.00531
AFIX  43
H3B   2    0.392876    0.252941    0.415476    31.00000   -1.20000
AFIX   0
C4B   1    0.388177    0.309713    0.498028    31.00000    0.03828    0.04037 =
         0.04496    0.00311    0.00748   -0.00140
AFIX  43
H4B   2    0.385413    0.410537    0.495551    31.00000   -1.20000
AFIX   0
C5B   1    0.389330    0.236050    0.548872    31.00000    0.03063    0.03699 =
         0.04129   -0.00288    0.00447   -0.00381
N2B   3    0.386949    0.253580    0.641755    31.00000    0.03240    0.03094 =
         0.03701    0.00089    0.00617   -0.00253
C6B   1    0.385032    0.323812    0.600017    31.00000    0.03445    0.02988 =
         0.03728    0.00243    0.00234    0.00002
C7B   1    0.381661    0.469405    0.597685    31.00000    0.03484    0.02566 =
         0.02903    0.00227    0.00490   -0.00095
AFIX  43
H7B   2    0.381097    0.519680    0.566003    31.00000   -1.20000
AFIX   0
C8B   1    0.379113    0.539532    0.644113    31.00000    0.03227    0.02643 =
         0.02707   -0.00244    0.00340   -0.00223
AFIX  43
H8B   2    0.376023    0.640042    0.646519    31.00000   -1.20000
AFIX   0
C9B   1    0.381343    0.454734    0.685340    31.00000    0.03435    0.02832 =
         0.02824   -0.00499    0.01195   -0.00029
AFIX  43
H9B   2    0.379971    0.501356    0.717578    31.00000   -1.20000
AFIX   0
C10B  1    0.385397    0.307643    0.686916    31.00000    0.02475    0.02401 =
         0.03259    0.00029    0.00776   -0.00617
N3B   3    0.391871    0.079734    0.707183    31.00000    0.03277    0.03628 =
         0.03821    0.00018    0.00337    0.00191
C11B  1    0.389105    0.201077    0.723764    31.00000    0.03180    0.03401 =
         0.03522    0.00573    0.00335   -0.00482
C12B  1    0.389573    0.229100    0.770220    31.00000    0.04346    0.03869 =
         0.03869    0.00391   -0.00200   -0.00530
AFIX  43
H12B  2    0.384627    0.322171    0.781448    31.00000   -1.20000
AFIX   0
C13B  1    0.398815    0.105203    0.813789    31.00000    0.04757    0.04300 =
         0.04210    0.00445    0.00293   -0.00018
AFIX  43
H13B  2    0.402757    0.122154    0.848895    31.00000   -1.20000
AFIX   0
C14B  1    0.399642   -0.037555    0.786504    31.00000    0.04652    0.03840 =
         0.04369    0.00415    0.00274    0.00214
AFIX  43
H14B  2    0.401613   -0.122750    0.806281    31.00000   -1.20000
AFIX   0
C15B  1    0.397865   -0.048153    0.739601    31.00000    0.04398    0.03713 =
         0.04339    0.00556    0.00037    0.00042
PART 1 31.00000
C16B  1    0.401344   -0.187251    0.707705    31.00000    0.04892    0.03517 =
         0.04874    0.00536    0.00497    0.00184
O1B   4    0.398595   -0.190010    0.661529    31.00000    0.05178    0.03168 =
         0.05461   -0.00290    0.00959    0.00066
O2B   4    0.408841   -0.290082    0.735754    31.00000    0.06949    0.05123 =
         0.08203    0.00641    0.00109    0.01696
C17B  1    0.395638   -0.141538    0.517717    31.00000    0.05307    0.05043 =
         0.06050    0.00002    0.00406    0.00185
O3B   4    0.416799   -0.201787    0.527590    31.00000    0.06827    0.05854 =
         0.10974    0.00685    0.00505    0.02198
O4B   4    0.375326   -0.207790    0.514061    31.00000    0.07396    0.04956 =
         0.08223    0.00048   -0.01067   -0.01537
PART 2 -31.000000
RU2'  5    0.388525    0.047843    0.609422   -31.00000    0.03212    0.01629 =
         0.04101    0.00027   -0.00127   -0.00466
N1B'  3    0.387646    0.087138    0.539398   -31.00000    0.03802    0.03385 =
         0.04584    0.00280    0.01135    0.00336
C1B'  1    0.387781   -0.040019    0.500736   -31.00000    0.04397    0.04075 =
         0.04737   -0.00390    0.00702    0.00317
C2B'  1    0.384618   -0.024314    0.449581   -31.00000    0.05170    0.04619 =
         0.05195   -0.00014    0.00659    0.00127
AFIX  43
H2B'  2    0.383761   -0.106442    0.427953   -31.00000   -1.20000
AFIX   0
C3B'  1    0.382568    0.117518    0.428262   -31.00000    0.05354    0.04338 =
         0.05031   -0.00107    0.00340   -0.00521
AFIX  43
H3B'  2    0.380735    0.134027    0.392491   -31.00000   -1.20000
AFIX   0
C4B'  1    0.383494    0.233808    0.465203   -31.00000    0.03898    0.03467 =
         0.04365    0.00186    0.01168   -0.00650
AFIX  43
H4B'  2    0.383586    0.330009    0.452885   -31.00000   -1.20000
AFIX   0
C5B'  1    0.384244    0.211483    0.517108   -31.00000    0.03470    0.03559 =
         0.04261    0.00380    0.00534   -0.00259
N2B'  3    0.384379    0.248983    0.611286   -31.00000    0.03410    0.02834 =
         0.04127   -0.00003    0.00016   -0.00251
C6B'  1    0.383402    0.315356    0.565090   -31.00000    0.03431    0.03167 =
         0.04299    0.00010    0.00096   -0.00452
C7B'  1    0.378747    0.459198    0.557047   -31.00000    0.03777    0.02959 =
         0.03310    0.00522   -0.00112   -0.00357
AFIX  43
H7B'  2    0.376699    0.500693    0.523990   -31.00000   -1.20000
AFIX   0
C8B'  1    0.377457    0.531395    0.598587   -31.00000    0.03585    0.03591 =
         0.03031    0.00114    0.00365   -0.00229
AFIX  43
H8B'  2    0.373202    0.630514    0.595833   -31.00000   -1.20000
AFIX   0
C9B'  1    0.381303    0.482616    0.642149   -31.00000    0.03694    0.03083 =
         0.02968    0.00017    0.00009    0.00001
AFIX  43
H9B'  2    0.382239    0.548242    0.670015   -31.00000   -1.20000
AFIX   0
C10"  1    0.384408    0.332459    0.652654   -31.00000    0.03157    0.02645 =
         0.03639   -0.00398    0.00555   -0.00067
DFIX 1.36 0.02 N3B" C11"
DFIX 1.34 0.02 N3B" C15"
N3B"  3    0.389785    0.088912    0.682103   -31.00000    0.02783    0.04381 =
         0.03301    0.00920    0.00347    0.00168
C11"  1    0.389502    0.236144    0.694789   -31.00000    0.03358    0.04318 =
         0.04156    0.00250    0.00312   -0.00262
C12"  1    0.391628    0.307970    0.741842   -31.00000    0.03724    0.03566 =
         0.04430    0.00659   -0.00021   -0.00339
AFIX  43
H12"  2    0.390015    0.409728    0.743230   -31.00000   -1.20000
AFIX   0
C13"  1    0.396319    0.226175    0.788633   -31.00000    0.04163    0.03757 =
         0.04468    0.00483   -0.00029   -0.00484
AFIX  43
H13"  2    0.397719    0.265596    0.822128   -31.00000   -1.20000
AFIX   0
C14"  1    0.398519    0.073878    0.775732   -31.00000    0.04285    0.04106 =
         0.04185    0.00517    0.00098   -0.00151
AFIX  43
H14"  2    0.401718    0.007075    0.802605   -31.00000   -1.20000
AFIX   0
C15"  1    0.396163    0.022299    0.726201   -31.00000    0.03771    0.03722 =
         0.03846   -0.00164    0.00492   -0.00285
C16"  1    0.398431   -0.143462    0.721911   -31.00000    0.05283    0.04232 =
         0.05066    0.00214    0.00326    0.00008
O1B'  4    0.378642   -0.214441    0.724250   -31.00000    0.06812    0.03041 =
         0.06863    0.00356    0.00300   -0.00710
O2B'  4    0.421988   -0.184818    0.718928   -31.00000    0.07611    0.04578 =
         0.08603    0.00057    0.01329    0.01421
C17"  1    0.390595   -0.180905    0.530123   -31.00000    0.04650    0.04493 =
         0.05651   -0.00088    0.00552    0.00043
O3B'  4    0.391076   -0.171101    0.582102   -31.00000    0.04934    0.03303 =
         0.06393    0.00638    0.00175    0.00540
O4B'  4    0.394267   -0.287471    0.503423   -31.00000    0.05792    0.03870 =
         0.07506   -0.01614    0.00167   -0.00491
PART 0
MOLE 3
SIMU 0.02 C1C > C5E
DELU 0.02 C1C > C5E
ISOR 0.01 C1C > C5E
PART 0
C1C   1    0.334228    0.083152    0.589307    11.00000    0.05143    0.02745 =
         0.06491   -0.00797    0.01570   -0.00758
AFIX  43
H1C   2    0.341574    0.141275    0.563412    11.00000   -1.20000
AFIX   0
C2C   1    0.307012    0.073833    0.589797    11.00000    0.04662    0.03618 =
         0.05010   -0.00198    0.01275    0.01012
AFIX  43
H2C   2    0.296729    0.126370    0.566081    11.00000   -1.20000
AFIX   0
C3C   1    0.296553   -0.011644    0.624905    11.00000    0.03903    0.02850 =
         0.05412   -0.00756    0.00801   -0.00179
C4C   1    0.312860   -0.084031    0.656065    11.00000    0.04389    0.03159 =
         0.06043   -0.00042    0.00559    0.00275
AFIX  43
H4C   2    0.305722   -0.146055    0.681042    11.00000   -1.20000
AFIX   0
C5C   1    0.339213   -0.074171    0.654151    11.00000    0.04159    0.03639 =
         0.06505   -0.01036    0.00978    0.00463
AFIX  43
H5C   2    0.349552   -0.132771    0.675864    11.00000   -1.20000
AFIX   0
N1C   3    0.350197    0.018493    0.621509    11.00000    0.04328    0.02769 =
         0.06331   -0.01881    0.01053   -0.00539
C6C   1    0.268720   -0.025161    0.629016    11.00000    0.04467    0.03460 =
         0.06453   -0.01208    0.01720   -0.00364

DFIX 2.11 0.01 H7C H2WY

C7C   1    0.253157    0.095034    0.620090    11.00000    0.05136    0.04311 =
         0.08271    0.00596   -0.00780   -0.00369
AFIX  43
H7C   2    0.260950    0.184007    0.611457    11.00000   -1.20000
AFIX   0
C8C   1    0.227782    0.088730    0.623304    11.00000    0.04914    0.03285 =
         0.08521    0.00667    0.00617    0.00668
AFIX  43
H8C   2    0.217986    0.174685    0.621224    11.00000   -1.20000
AFIX   0
N2C   3    0.215801   -0.039703    0.629537    11.00000    0.04633    0.03299 =
         0.07099    0.00179    0.01504   -0.00310
C9C   1    0.229279   -0.156801    0.634520    11.00000    0.04201    0.03753 =
         0.08289    0.00889    0.00963    0.00372
AFIX  43
H9C   2    0.220838   -0.246640    0.638318    11.00000   -1.20000
AFIX   0
C10C  1    0.255434   -0.152227    0.634363    11.00000    0.04196    0.02981 =
         0.08587    0.00322    0.01021    0.00010
AFIX  43
H10C  2    0.264737   -0.239509    0.638061    11.00000   -1.20000
AFIX  66
DFIX 2.05 0.01 RU2 N1D
DFIX 2.05 0.01 RU2' N1D'
DFIX 1.48 0.02 C3D C6D
SIMU 0.01 N1D > C10I
DELU 0.01 N1D > C10I
ISOR 0.005 N1D > C10I
PART 1 51.0000
N1D   3    0.430622    0.057857    0.635888    51.00000    0.06116    0.05892 =
         0.06293    0.00027    0.00039   -0.00031
C1D   1    0.444002    0.186332    0.631123    51.00000    0.06414    0.06335 =
         0.06612    0.00050    0.00159   -0.00237
AFIX  43
H1D   2    0.435180    0.275548    0.632843    51.00000   -1.20000
AFIX  65
C2D   1    0.470292    0.184271    0.623842    51.00000    0.06742    0.06840 =
         0.07095   -0.00027    0.00232   -0.00335
AFIX  43
H2D   2    0.479436    0.272079    0.620585    51.00000   -1.20000
AFIX  65
C3D   1    0.483201    0.053735    0.621326    51.00000    0.07382    0.07318 =
         0.07663    0.00052    0.00229   -0.00178
C4D   1    0.469820   -0.074742    0.626091    51.00000    0.06805    0.06812 =
         0.06967   -0.00048    0.00240    0.00099
AFIX  43
H4D   2    0.478379   -0.164626    0.623657    51.00000   -1.20000
AFIX  66
C5D   1    0.444328   -0.068950    0.634275    51.00000    0.06366    0.06165 =
         0.06425   -0.00072    0.00046    0.00122
AFIX  43
H5D   2    0.435398   -0.156828    0.639168    51.00000   -1.20000
AFIX  66
C6D   1    0.511692    0.016664    0.632645    51.00000    0.08438    0.08791 =
         0.08960   -0.00076    0.00086   -0.00031
C7D   1    0.524898   -0.012482    0.587932    51.00000    0.09174    0.09491 =
         0.09472    0.00032    0.00441    0.00062
AFIX  43
H7D   2    0.515752   -0.031880    0.557029    51.00000   -1.20000
AFIX  65
C8D   1    0.551485   -0.013245    0.588436    51.00000    0.09756    0.10070 =
         0.10007    0.00045    0.00260    0.00055
AFIX  43
H8D   2    0.560511   -0.033165    0.557877    51.00000   -1.20000
AFIX  65
N2D   3    0.564867    0.015137    0.633653    51.00000    0.09893    0.10061 =
         0.10073   -0.00085    0.00119    0.00039
C9D   1    0.551662    0.044283    0.678366    51.00000    0.09733    0.09999 =
         0.09894    0.00101   -0.00087   -0.00055
AFIX  43
H9D   2    0.560808    0.063681    0.709269    51.00000   -1.20000
AFIX  65
C10D  1    0.525074    0.045047    0.677862    51.00000    0.09447    0.09774 =
         0.09618    0.00130   -0.00267   -0.00049
AFIX  43
H10D  2    0.516049    0.064967    0.708422    51.00000   -1.20000
AFIX   0
PART 2 -51.00000
N1D'  3    0.427842    0.059613    0.608199   -51.00000    0.05967    0.05708 =
         0.06104   -0.00011    0.00344   -0.00094
C1D'  1    0.442119    0.172107    0.597904   -51.00000    0.06405    0.06299 =
         0.06617   -0.00008    0.00234   -0.00207
AFIX  43
H1D'  2    0.432569    0.258437    0.593886   -51.00000   -1.20000
AFIX   0
C2D'  1    0.467445    0.190678    0.591854   -51.00000    0.06635    0.06655 =
         0.06944    0.00029    0.00266   -0.00375
AFIX  43
H2D'  2    0.475297    0.281673    0.586747   -51.00000   -1.20000
AFIX   0
C3D'  1    0.480061    0.068252    0.593833   -51.00000    0.07311    0.07303 =
         0.07667   -0.00058    0.00294   -0.00079
C4D'  1    0.469798   -0.073076    0.600966   -51.00000    0.06646    0.06702 =
         0.06851    0.00027    0.00003    0.00202
AFIX  43
H4D'  2    0.479395   -0.159694    0.599092   -51.00000   -1.20000
AFIX   0
C5D'  1    0.442795   -0.065177    0.611407   -51.00000    0.06247    0.06037 =
         0.06415   -0.00010    0.00247    0.00174
AFIX  43
H5D'  2    0.434489   -0.151620    0.621254   -51.00000   -1.20000
AFIX  66
C6D'  1    0.510703    0.114843    0.601687   -51.00000    0.08401    0.08743 =
         0.09015    0.00054    0.00178   -0.00083
C7D'  1    0.525203    0.130028    0.646345   -51.00000    0.09228    0.09451 =
         0.09537    0.00077   -0.00166   -0.00089
AFIX  43
H7D'  2    0.516968    0.140267    0.678379   -51.00000   -1.20000
AFIX  65
C8D'  1    0.551753    0.130232    0.644133   -51.00000    0.09711    0.09991 =
         0.10045    0.00078   -0.00025   -0.00079
AFIX  43
H8D'  2    0.561663    0.140611    0.674656   -51.00000   -1.20000
AFIX  65
N2D'  3    0.563802    0.115251    0.597263   -51.00000    0.10094    0.10310 =
         0.10350   -0.00022    0.00190   -0.00112
C9D'  1    0.549303    0.100065    0.552605   -51.00000    0.09768    0.10018 =
         0.10033    0.00114    0.00330   -0.00086
AFIX  43
H9D'  2    0.557538    0.089826    0.520571   -51.00000   -1.20000
AFIX  65
C10I  1    0.522753    0.099861    0.554816   -51.00000    0.09435    0.09710 =
         0.09614    0.00086    0.00621   -0.00051
AFIX  43
H10I  2    0.512843    0.089482    0.524294   -51.00000   -1.20000
AFIX   0
PART 0
DFIX 2.05 0.01 RU1 N1E
DFIX 2.05 0.01 RU1' N1E'
SIMU 0.01 N1E > C10O
DELU 0.01 N1E > C10O
ISOR 0.005 N1E > C10O
part 2 -41.00000
N1E   3    0.136367   -0.010359    0.634920   -41.00000    0.03517    0.03036 =
         0.03443    0.00095    0.00051    0.00465
C1E   1    0.124631    0.085571    0.671406   -41.00000    0.03791    0.03336 =
         0.03644    0.00186    0.00159    0.00277
AFIX  43
H1E   2    0.135634    0.136195    0.694350   -41.00000   -1.20000
AFIX   0
C2E   1    0.100187    0.107799    0.675200   -41.00000    0.04082    0.03736 =
         0.03903    0.00136    0.00243    0.00271
AFIX  43
H2E   2    0.093408    0.168669    0.700931   -41.00000   -1.20000
AFIX   0
C3E   1    0.081058    0.023241    0.632176   -41.00000    0.04581    0.04419 =
         0.04646   -0.00017    0.00032   -0.00044
C4E   1    0.094165   -0.065604    0.606067   -41.00000    0.04043    0.03716 =
         0.03843    0.00065   -0.00150   -0.00200
AFIX  43
H4E   2    0.085181   -0.130670    0.584299   -41.00000   -1.20000
AFIX   0
C5E   1    0.120420   -0.073498    0.607320   -41.00000    0.03938    0.03372 =
         0.03569    0.00168    0.00001    0.00036
AFIX  43
H5E   2    0.127547   -0.137851    0.583083   -41.00000   -1.20000
AFIX  66
C6E   1    0.054696    0.048890    0.653360   -41.00000    0.05297    0.05560 =
         0.05500   -0.00101    0.00108    0.00124
C7E   1    0.038320    0.043989    0.611048   -41.00000    0.05492    0.05563 =
         0.05870   -0.00050   -0.00085    0.00141
AFIX  43
H7E   2    0.045088    0.033647    0.577641   -41.00000   -1.20000
AFIX  65
C8E   1    0.012039    0.054221    0.617614   -41.00000    0.05862    0.06133 =
         0.06213    0.00043    0.00068    0.00054
AFIX  43
H8E   2    0.000847    0.050871    0.588695   -41.00000   -1.20000
AFIX  65
N2E   3    0.002136    0.069353    0.666492   -41.00000    0.06645    0.06789 =
         0.06724   -0.00282    0.00377   -0.00081
C9E   1    0.018512    0.074254    0.708805   -41.00000    0.06455    0.06694 =
         0.06662   -0.00036    0.00292    0.00119
AFIX  43
H9E   2    0.011743    0.084597    0.742212   -41.00000   -1.20000
AFIX  65
C10E  1    0.044792    0.064023    0.702240   -41.00000    0.06207    0.06358 =
         0.06188   -0.00193    0.00473    0.00162
AFIX  43
H10E  2    0.055985    0.067373    0.731159   -41.00000   -1.20000
AFIX   0
part 1 41.000000
N1E'  3    0.133131   -0.021748    0.616603    41.00000    0.03493    0.03133 =
         0.03545    0.00049   -0.00023    0.00387
C1E'  1    0.120665    0.060181    0.649303    41.00000    0.03739    0.03404 =
         0.03683   -0.00041    0.00086    0.00183
AFIX  43
H1E'  2    0.130172    0.110742    0.674793    41.00000   -1.20000
AFIX   0
C2E'  1    0.093250    0.075991    0.647893    41.00000    0.03958    0.03765 =
         0.03964   -0.00009    0.00134    0.00196
AFIX  43
H2E'  2    0.083250    0.130357    0.671075    41.00000   -1.20000
AFIX   0
C3E'  1    0.083668   -0.007339    0.604075    41.00000    0.04514    0.04314 =
         0.04230   -0.00099   -0.00057   -0.00174
C4E'  1    0.094321   -0.075460    0.576026    41.00000    0.04110    0.03827 =
         0.04052    0.00066   -0.00136   -0.00179
AFIX  43
H4E'  2    0.085544   -0.122426    0.548683    41.00000   -1.20000
AFIX   0
C5E'  1    0.120025   -0.089376    0.581980    41.00000    0.03929    0.03334 =
         0.03811    0.00060   -0.00094   -0.00065
AFIX  43
H5E'  2    0.128826   -0.152129    0.559507    41.00000   -1.20000
AFIX   0
C6E'  1    0.055159    0.033826    0.613682    41.00000    0.05221    0.05378 =
         0.05375   -0.00103    0.00006    0.00126
C7E'  1    0.043571    0.070516    0.559203    41.00000    0.05686    0.05746 =
         0.05762   -0.00082   -0.00157    0.00251
AFIX  43
H7E'  2    0.055034    0.070057    0.531245    41.00000   -1.20000
AFIX   0
DFIX 1.34 0.02 C8E' N2E'
DFIX 1.34 0.02 C8E' N2E'
C8E'  1    0.015580    0.106822    0.547110    41.00000    0.05902    0.06172 =
         0.06105   -0.00075   -0.00098    0.00132
AFIX  43
H8E'  2    0.009707    0.141658    0.514837    41.00000   -1.20000
AFIX   0
N2E'  3    0.000238    0.083907    0.587257    41.00000    0.05936    0.06271 =
         0.06347   -0.00095   -0.00036   -0.00047
C9E'  1    0.009822    0.054714    0.636237    41.00000    0.05835    0.06146 =
         0.06091   -0.00011    0.00346   -0.00028
AFIX  43
H9E'  2   -0.001374    0.053334    0.664624    41.00000   -1.20000
AFIX   0
C10O  1    0.034963    0.028456    0.643312    41.00000    0.05760    0.06016 =
         0.06052   -0.00005    0.00255    0.00059
AFIX  43
H10O  2    0.039048   -0.000455    0.677347    41.00000   -1.20000
AFIX   0
SIMU 0.01 N1T > O11'
DELU 0.01 N1T > O11'
ISOR 0.005 N1T > O11'

PART 1 61.0000
DFIX 1.11 0.01 N1T C1T
DFIX 1.45 0.01 C1T C2T
DFIX 2.55 0.02 N1T C2T
N1T   3    0.440105    0.553682    0.633656    61.00000    0.05746    0.06202 =
         0.06298    0.00177    0.00529    0.00316
C1T   1    0.442489    0.564511    0.591543    61.00000    0.05804    0.06178 =
         0.06162   -0.00072    0.00165    0.00208
C2T   1    0.437189    0.571468    0.536761    61.00000    0.06513    0.06360 =
         0.06473   -0.00172   -0.00017    0.00111
AFIX  33
H2TA  2    0.453151    0.588842    0.518464    61.00000   -1.50000
H2TB  2    0.429686    0.480191    0.525263    61.00000   -1.50000
H2TC  2    0.425159    0.650058    0.529653    61.00000   -1.50000
AFIX   0
PART 2 -61.0000
DFIX 0.85 0.01 O5W H5WA
DFIX 0.85 0.01 O5W H5WB
DFIX 1.35 0.01 H5WA H5WB

O5W   4    0.444525    0.553846    0.672426   -61.00000    0.05433    0.06746 =
         0.06797   -0.00436    0.00055    0.00440
H5WA  2    0.440834    0.631314    0.688073   -61.00000   -1.50000
H5WB  2    0.441941    0.487161    0.694083   -61.00000   -1.50000
DFIX 0.85 0.01 O6W H6WA
DFIX 0.85 0.01 O6W H6WB
DFIX 1.35 0.01 H6WA H6WB

O6W   4    0.440866    0.556817    0.564390   -61.00000    0.05330    0.06142 =
         0.05865    0.00004    0.00897    0.00468
H6WA  2    0.447174    0.639438    0.558383   -61.00000   -1.50000
H6WB  2    0.446545    0.502818    0.540783   -61.00000   -1.50000
PART 3
REM DFIX 0.85 0.01 O5W' H5WC
REM DFIX 0.85 0.01 O5W' H5WD
REM DFIX 1.35 0.01 H5WC H5WD
O5W'  4    0.446296    0.632373    0.646561    10.15000    0.05730    0.06275 =
         0.06314   -0.00190    0.00118    0.00223

AFIX   3
H5WC  2    0.429962    0.629943    0.648278    10.15000   -1.50000
H5WD  2    0.449878    0.721230    0.643097    10.15000   -1.50000
AFIX   0
PART 4
REM DFIX 0.85 0.01 O5W" H5WE
REM DFIX 0.85 0.01 O5W" H5WF
REM DFIX 1.35 0.01 H5WE H5WF
O5W"  4    0.458546    0.628684    0.632155    10.10000    0.05826    0.06191 =
         0.06250   -0.00111    0.00127    0.00186
AFIX   3
H5WE  2    0.447707    0.695318    0.626640    10.10000   -1.50000
H5WF  2    0.472627    0.672239    0.639834    10.10000   -1.50000
AFIX   0
PART 5
REM DFIX 0.85 0.01 O6W' H6WC
REM DFIX 0.85 0.01 O6W' H6WD
REM DFIX 1.35 0.01 H6WC H6WD

O6W'  4    0.485992    0.559353    0.626769    10.10000    0.05989    0.06064 =
         0.06046   -0.00056    0.00038    0.00158
AFIX   3
H6WC  2    0.501970    0.522309    0.625901    10.10000   -1.50000
H6WD  2    0.485826    0.626822    0.648618    10.10000   -1.50000
AFIX   0
PART 6

REM DFIX 0.85 0.01 O7W H7WA
REM DFIX 0.85 0.01 O7W H7WB
REM DFIX 1.35 0.01 H7WA H7WB

O7W   4    0.467312    0.457096    0.631706    10.10000    0.05857    0.06200 =
         0.06177   -0.00084    0.00113    0.00269
AFIX   3
H7WA  2    0.478352    0.395411    0.621473    10.10000   -1.50000
H7WB  2    0.476853    0.535433    0.641555    10.10000   -1.50000
AFIX   0
PART 8
REM DFIX 0.85 0.01 O7W' H7WC
REM DFIX 0.85 0.01 O7W' H7WD
REM DFIX 1.35 0.01 H7WC H7WD
O7W'  4    0.520231    0.694437    0.680227    10.10000    0.09455    0.09437 =
         0.09263   -0.00052    0.00327   -0.00126
AFIX   3
H7WC  2    0.513384    0.654287    0.705880    10.10000   -1.50000
H7WD  2    0.525732    0.774897    0.691343    10.10000   -1.50000
AFIX   0
PART 0

part 0
PART 2
DFIX 1.11 0.01 N1U C1U
DFIX 1.45 0.01 C1U C2U
DFIX 2.55 0.02 N1U C2U
N1U   3    0.257509   -0.165509    0.256636    10.25000    0.06748    0.06950 =
         0.06760   -0.00072   -0.00025    0.00424
C1U   1    0.260112   -0.053571    0.270885    10.25000    0.06866    0.06820 =
         0.06814    0.00039    0.00137   -0.00061
C2U   1    0.266829    0.076799    0.298727    10.25000    0.06433    0.06652 =
         0.06632    0.00090    0.00615   -0.00164
AFIX   3
H2UA  2    0.283932    0.116744    0.293311    10.25000   -1.50000
H2UB  2    0.263725    0.068602    0.335559    10.25000   -1.50000
H2UC  2    0.253979    0.140501    0.283140    10.25000   -1.50000
AFIX   0
PART 3
DFIX 1.11 0.01 N1V C1V
DFIX 1.45 0.01 C1V C2V
DFIX 2.55 0.02 N1V C2V
N1V   3    0.278992    0.014017    0.339760    10.25000    0.06408    0.06978 =
         0.07257    0.00190    0.00619   -0.00092
C1V   1    0.265899    0.031722    0.306358    10.25000    0.06858    0.06909 =
         0.06833   -0.00029    0.00315   -0.00062
C2V   1    0.243282    0.009440    0.274107    10.25000    0.06700    0.06568 =
         0.06768    0.00057    0.00431   -0.00007
AFIX  33
H2VA  2    0.243957    0.073793    0.244411    10.25000   -1.50000
H2VB  2    0.242790   -0.090721    0.262376    10.25000   -1.50000
H2VC  2    0.227897    0.030268    0.293856    10.25000   -1.50000
AFIX   0
PART 0
REM EADP N1W C1W C2W
DFIX 1.11 0.01 N1W C1W
DFIX 1.45 0.01 C1W C2W
DFIX 2.56 0.02 N1W C2W
PART 2
REM AFIX 3
N1W   3    0.237688    0.376340    0.515463    10.33333    0.10550    0.10810 =
         0.10583   -0.00211    0.00150   -0.00002
C1W   1    0.248224    0.427805    0.547928    10.33333    0.10390    0.10405 =
         0.10456   -0.00044    0.00096    0.00023
C2W   1    0.259494    0.468238    0.597012    10.33333    0.10124    0.09766 =
         0.10184    0.00069    0.00361   -0.00026
REM AFIX 0
AFIX 137
H2WX  2    0.266684    0.565369    0.594607    10.33333   -1.50000
H2WY  2    0.273096    0.400040    0.606179    10.33333   -1.50000
H2WZ  2    0.246301    0.466573    0.623353    10.33333   -1.50000
AFIX   0
PART 0
PART 1

REM DFIX 0.85 0.01 O1W H1WA
REM DFIX 0.85 0.01 O1W H1WB
REM DFIX 1.35 0.01 H1WA H1WB
O1W   4   10.269132   10.469531   10.606577    10.25000    0.09988    0.09668 =
         0.10047   -0.00065    0.00097   -0.00005
AFIX   3
H1WA  2    0.274890    0.464923    0.637871    10.25000   -1.50000
H1WB  2    0.276689    0.401980    0.589448    10.25000   -1.50000
AFIX   0
DFIX 0.85 0.01 O2W H2WA
DFIX 0.85 0.01 O2W H2WB
DFIX 1.35 0.01 H2WA H2WB

O2W   4    0.239749    0.553815    0.520770    10.25000    0.10596    0.10716 =
         0.10770   -0.00100    0.00024   -0.00018
H2WA  2    0.238820    0.599366    0.492543    10.25000   -1.50000
H2WB  2    0.253681    0.506768    0.519384    10.25000   -1.50000
PART 3
REM DFIX 0.85 0.01 O1W' H1WC
REM DFIX 0.85 0.01 O1W' H1WD
REM DFIX 1.35 0.01 H1WC H1WD
O1W'  4    0.268320    0.468480    0.625064    10.25000    0.09803    0.09381 =
         0.09986    0.00048    0.00196   -0.00036

AFIX   3
H1WC  2    0.256027    0.438535    0.643236    10.25000   -1.50000
H1WD  2    0.278171    0.513016    0.645799    10.25000   -1.50000
AFIX   0
DFIX 0.85 0.01 O2W' H2WC
DFIX 0.85 0.01 O2W' H2WD
DFIX 1.35 0.01 H2WC H2WD

O2W'  4    0.227665    0.476511    0.573203    10.25000    0.10346    0.10526 =
         0.10487   -0.00054    0.00034    0.00019
H2WC  2    0.222056    0.491272    0.603166    10.25000   -1.50000
H2WD  2    0.237560    0.546942    0.567234    10.25000   -1.50000
PART 4
DFIX 0.85 0.01 O3W H3WA
DFIX 0.85 0.01 O3W H3WB
DFIX 1.35 0.01 H3WA H3WB
O3W   4    0.227839    0.422047    0.543390    10.20000    0.10487    0.10571 =
         0.10630   -0.00055    0.00157   -0.00009

H3WA  2    0.218520    0.456372    0.519437    10.20000   -1.50000
H3WB  2    0.233669    0.343475    0.531600    10.20000   -1.50000
PART 0

PART 3
REM DFIX 0.85 0.01 O4W H4WA
REM DFIX 0.85 0.01 O4W H4WB
REM DFIX 1.35 0.01 H4WA H4WB

O4W   4    0.303281    0.209158    0.269004    10.25000    0.05009    0.05231 =
         0.05108    0.00264    0.01158    0.00097
AFIX   3
H4WA  2    0.286519    0.256652    0.245976    10.25000   -1.50000
H4WB  2    0.298783    0.266502    0.311640    10.25000   -1.50000
AFIX   0
part 3
REM DFIX 0.85 0.01 O8W H8WA
REM DFIX 0.85 0.01 O8W H8WB
REM DFIX 1.35 0.01 H8WA H8WB
O8W   4    0.529524    0.019079    0.761627    10.25000    0.09830    0.09850 =
         0.10033    0.00015    0.00255    0.00112
AFIX   3
H8WA  2    0.542473    0.073295    0.739184    10.25000   -1.50000
H8WB  2    0.515898    0.039115    0.738963    10.25000   -1.50000
AFIX   0
PART 4
REM DFIX 0.85 0.01 O8W' H8WC
REM DFIX 0.85 0.01 O8W' H8WD
REM DFIX 1.35 0.01 H8WC H8WD
O8W'  4    0.526072   -0.042447    0.749279    10.15000    0.09833    0.09877 =
         0.09893   -0.00041    0.00178    0.00050

AFIX   3
H8WC  2    0.518797   -0.112730    0.734135    10.15000   -1.50000
H8WD  2    0.516384    0.028705    0.744659    10.15000   -1.50000
AFIX   0
DFIX 0.85 0.01 O8W" H8WE
DFIX 0.85 0.01 O8W" H8WF
DFIX 1.35 0.01 H8WE H8WF
PART 5
O8W"  4    0.518070   -0.066278    0.805476    10.10000    0.09838    0.09840 =
         0.09917   -0.00018    0.00204    0.00114
H8WE  2    0.526254    0.008159    0.796193    10.10000   -1.50000
H8WF  2    0.507925   -0.085001    0.780665    10.10000   -1.50000

PART 0

PART 3
REM DFIX 0.85 0.01 O9W H9WA
REM DFIX 0.85 0.01 O9W H9WB
REM DFIX 1.35 0.01 H9WA H9WB
O9W   4    0.473141    0.325811    0.743870    10.25000    0.10637    0.10648 =
         0.10800    0.00387    0.00126    0.00590
AFIX   3
H9WA  2    0.483113    0.407843    0.750189    10.25000   -1.50000
H9WB  2    0.471767    0.284898    0.783108    10.25000   -1.50000
AFIX   0
PART 4
DFIX 0.85 0.01 O9W' H9WC
DFIX 0.85 0.01 O9W' H9WD
DFIX 1.35 0.01 H9WC H9WD
O9W'  4    0.455503    0.229151    0.733285    10.20000    0.11081    0.11098 =
         0.11170    0.00140    0.00003    0.00381

H9WC  2    0.446994    0.228518    0.705326    10.20000   -1.50000
H9WD  2    0.450605    0.154734    0.749376    10.20000   -1.50000
PART 0

PART 3
REM DFIX 0.85 0.01 O10W H10X
REM DFIX 0.85 0.01 O10W H10Y
REM DFIX 1.35 0.01 H10X H10Y

O10W  4    0.469258    0.822242    0.497189    10.15000    0.12359    0.12231 =
         0.12235    0.00122    0.00569    0.00211
AFIX   3
H10X  2    0.485289    0.820059    0.503189    10.15000   -1.50000
H10Y  2    0.462993    0.757554    0.516358    10.15000   -1.50000
AFIX   0
PART 4
DFIX 0.85 0.01 O10' H10Z
DFIX 0.85 0.01 O10' H10T
DFIX 1.35 0.01 H10Z H10T

O10'  4    0.486295    0.792309    0.452341    10.25000    0.12323    0.12181 =
         0.12204    0.00242    0.00600    0.00306
REM AFIX   3
H10Z  2    0.493671    0.720640    0.438663    10.25000   -1.50000
H10T  2    0.497314    0.827301    0.473086    10.25000   -1.50000
REM AFIX   0
part 0
PART 3
REM DFIX 0.85 0.01 O11W H11X
REM DFIX 0.85 0.01 O11W H11Y
REM DFIX 1.35 0.01 H11X H11Y

O11W  4    0.028903    0.194849    0.497861    10.25000    0.10488    0.10767 =
         0.10648   -0.00053    0.00623    0.00048
AFIX   3
H11X  2    0.022599    0.227017    0.469963    10.25000   -1.50000
H11Y  2    0.037546    0.264230    0.510366    10.25000   -1.50000
AFIX   0
PART 4
REM DFIX 0.85 0.01 O11' H11U
REM DFIX 0.85 0.01 O11' H11T
REM DFIX 1.35 0.01 H11U H11T
O11'  4    0.019480    0.077583    0.485962    10.20000    0.10293    0.10771 =
         0.10461   -0.00056    0.00403    0.00197

AFIX   3
H11U  2    0.003337    0.139230    0.473336    10.20000   -1.50000
H11T  2    0.029551    0.145081    0.468324    10.20000   -1.50000
part 0
AFIX   0
HKLF 4


REM  mo_AH95dimer_0m in C2/c
REM wR2 = 0.3595, GooF = S = 1.928, Restrained GooF = 1.650 for all data
REM R1 = 0.1437 for 6497 Fo > 4sig(Fo) and 0.2116 for all 11339 data
REM 1757 parameters refined using 4609 restraints

END

WGHT      0.2000      0.0000

REM Highest difference peak  2.700,  deepest hole -1.094,  1-sigma level  0.219
Q1    1   0.1754  0.0350  0.6418  11.00000  0.05    2.70
Q2    1   0.3898 -0.0344  0.6068  11.00000  0.05    2.68
Q3    1   0.1784 -0.0231  0.5785  11.00000  0.05    2.20
Q4    1   0.3882  0.0232  0.6791  11.00000  0.05    2.12
Q5    1   0.3897  0.0756  0.6164  11.00000  0.05    1.68
Q6    1   0.1720 -0.0251  0.6768  11.00000  0.05    1.64
Q7    1   0.2615  0.0397  0.6013  11.00000  0.05    1.61
Q8    1   0.0465 -0.0430  0.6490  11.00000  0.05    1.58
Q9    1   0.3901  0.0415  0.7169  11.00000  0.05    1.31
Q10   1   0.4007  0.0340  0.5886  11.00000  0.05    1.26
Q11   1   0.2602  0.0452  0.6616  11.00000  0.05    1.17
Q12   1   0.3890  0.2769  0.6969  11.00000  0.05    1.04
Q13   1   0.1753 -0.2224  0.6318  11.00000  0.05    0.97
Q14   1   0.1745 -0.2570  0.5693  11.00000  0.05    0.97
Q15   1   0.3902 -0.0567  0.7283  11.00000  0.05    0.93
Q16   1   0.5096  0.0483  0.5994  11.00000  0.05    0.91
Q17   1   0.3913  0.0494  0.5196  11.00000  0.05    0.88
Q18   1   0.3884  0.2478  0.5840  11.00000  0.05    0.86
Q19   1   0.4777 -0.0366  0.5939  11.00000  0.05    0.85
Q20   1   0.3908 -0.0600  0.8055  11.00000  0.05    0.84
;
_shelx_res_checksum   93197

_shelx_hkl_file
;
  -2   0   0 -0.0032 0.00787   2
   2   0   0 -0.0092 0.01828   1
   2   0   0 0.00529 0.01234   3
  -2   0   0 -0.0096 0.01704   1
  -6   0   0 214.933 19.3494   2
   6   0   0 215.779 19.3919   3
  -6   0   0 218.417 19.3819   1
   6   0   0 220.494 19.3485   2
  -6   0   0 206.028 19.3790   3
   8   0   0 16.2769 1.71809   3
  -8   0   0 15.0828 1.60577   2
   8   0   0 15.3153 1.62758   2
  -8   0   0 15.0430 1.70110   1
  -8   0   0 15.0929 1.67806   3
  10   0   0 1133.45 104.434   3
  10   0   0 1175.29 104.006   2
 -10   0   0 1176.28 104.048   1
 -10   0   0 1156.42 104.002   2
 -10   0   0 1152.91 104.369   3
 -12   0   0 176.377 16.5680   1
  12   0   0 185.721 16.5079   2
 -12   0   0 184.997 16.5779   3
  12   0   0 181.212 16.6012   3
 -12   0   0 184.727 16.5072   2
 -14   0   0 9944.72 875.086   3
 -14   0   0 9841.70 874.571   2
 -14   0   0 9999.99 874.913   1
  14   0   0 9101.48 875.237   3
  14   0   0 9881.55 874.421   2
 -16   0   0 810.874 70.6071   1
  16   0   0 735.000 70.6646   3
 -16   0   0 790.536 70.5251   2
 -16   0   0 813.826 70.6191   3
  16   0   0 775.013 70.5272   2
 -18   0   0 3717.88 342.109   1
  18   0   0 3805.27 342.045   2
  18   0   0 3781.98 343.017   3
 -18   0   0 3662.32 342.068   2
 -18   0   0 4112.51 342.948   3
 -20   0   0 691.149 62.7688   3
  20   0   0 643.567 62.8220   3
 -20   0   0 691.924 62.6676   2
 -20   0   0 704.237 62.7738   1
  20   0   0 757.420 62.6908   2
 -24   0   0 172.247 15.5948   1
  24   0   0 173.177 15.4668   2
 -24   0   0 172.845 15.4672   2
 -24   0   0 161.487 15.5770   3
 -26   0   0 52.4884 4.76433   2
 -26   0   0 46.2745 4.86756   3
  26   0   0 48.4115 4.72759   2
 -26   0   0 51.3961 4.93156   1
 -28   0   0 512.032 45.0635   2
 -28   0   0 487.576 45.2008   1
 -30   0   0 93.7448 8.87049   2
 -30   0   0 97.8623 9.08284   1
 -32   0   0 493.577 45.2058   1
 -32   0   0 504.703 45.0236   2
 -34   0   0 309.651 26.6763   1
 -34   0   0 276.016 26.4358   2
 -36   0   0 92.2258 8.54413   1
 -36   0   0 84.6942 8.24116   2
 -38   0   0 36.1062 4.06397   1
 -38   0   0 33.8624 3.63371   2
 -40   0   0 40.5517 4.49438   2
 -40   0   0 51.7346 4.89013   1
 -42   0   0 148.325 13.7232   1
 -42   0   0 142.289 13.4198   2
 -44   0   0 42.7734 4.53797   1
 -44   0   0 36.0928 4.05794   2
 -46   0   0 109.694 10.6333   1
 -46   0   0 109.425 10.3257   2
 -48   0   0 73.8146 7.15052   2
 -48   0   0 72.8003 7.48909   1
 -50   0   0 42.7099 4.74744   2
 -50   0   0 50.6028 5.34644   1
 -52   0   0 58.1216 6.22043   1
 -52   0   0 56.1207 5.79900   2
 -54   0   0 19.5779 2.61601   2
 -54   0   0 17.3111 3.04369   1
 -56   0   0 25.5511 3.20485   2
 -56   0   0 24.5396 3.78607   1
 -58   0   0 12.9493 2.18125   2
 -58   0   0 12.1655 2.84829   1
 -60   0   0 34.9471 4.62023   1
 -60   0   0 33.1275 3.88595   2
 -62   0   0 13.9501 2.42887   2
 -62   0   0 15.3703 3.12019   1
   1  -1   0 75.4309 6.44654   1
   1  -1   0 70.2022 6.40824   2
  -1  -1   0 69.9308 6.43763   1
  -1  -1   0 64.9475 6.40318   2
   1   1   0 73.1395 6.43773   1
  -1   1   0 76.5413 6.44122   1
  -1   1   0 70.2689 6.40340   2
   1   1   0 67.2564 6.40253   2
  -3  -1   0 129.202 12.0613   2
  -3  -1   0 126.148 12.0818   1
   3  -1   0 124.455 12.0574   3
  -3  -1   0 139.783 12.0417   3
   3   1   0 148.576 12.0907   1
  -3   1   0 136.573 12.0552   3
   3   1   0 133.250 12.0619   2
  -5  -1   0 1104.17 100.845   2
  -5  -1   0 1144.20 100.810   1
   5  -1   0 1058.62 101.050   3
  -5  -1   0 1146.61 101.093   3
  -5   1   0 1148.81 101.128   3
   5   1   0 1144.43 100.810   1
  -7  -1   0 0.31222 0.41734   3
  -7  -1   0 0.05888 0.54723   1
   7  -1   0 0.31799 0.47144   3
  -7  -1   0 -0.1051 0.45478   2
   7   1   0 0.26048 0.56352   1
   7   1   0 -0.0533 0.08614   2
  -7   1   0 -0.0065 0.40350   3
  -9  -1   0 813.244 74.0931   3
   9  -1   0 818.813 73.9929   3
  -9  -1   0 815.673 73.9576   1
  -9  -1   0 853.913 73.9395   2
  -9   1   0 860.130 73.9232   2
   9   1   0 829.534 73.9585   1
   9   1   0 776.219 73.9303   2
 -11  -1   0 98.1338 8.99691   2
  11  -1   0 82.7607 9.05405   3
 -11  -1   0 95.0235 9.03267   3
 -11  -1   0 97.2115 9.02999   1
  11   1   0 108.220 9.05047   1
  11   1   0 101.601 9.06233   3
  11   1   0 105.794 9.00418   2
 -11   1   0 104.153 8.98495   2
 -13  -1   0 4.90914 0.87625   1
  13  -1   0 4.67253 0.95694   3
  13  -1   0 5.18316 0.84287   2
 -13  -1   0 4.66958 0.79167   2
 -13  -1   0 4.09154 0.78859   3
  13   1   0 4.80308 0.96010   1
 -13   1   0 4.81815 0.76040   2
  13   1   0 5.12334 0.80257   2
  13   1   0 4.10590 0.85866   3
  15  -1   0 249.755 22.8717   2
 -15  -1   0 241.779 22.9363   3
 -15  -1   0 267.612 22.8970   2
 -15  -1   0 248.819 22.9374   1
  15  -1   0 242.690 22.9972   3
 -15   1   0 266.831 22.8686   2
  15   1   0 273.581 22.8985   2
  15   1   0 238.901 22.9133   1
  17  -1   0 187.796 19.5590   3
  17  -1   0 226.643 19.4365   2
 -17  -1   0 218.309 19.5144   3
 -17  -1   0 217.236 19.4531   2
 -17  -1   0 207.177 19.4965   1
  17   1   0 215.123 19.4912   1
 -17   1   0 230.895 19.4285   2
  17   1   0 216.341 19.4368   2
  19  -1   0 824.066 78.1194   3
 -19  -1   0 832.102 78.0293   1
 -19  -1   0 805.324 77.9683   2
  19  -1   0 937.814 77.9819   2
 -19  -1   0 930.747 78.0820   3
  19   1   0 899.271 78.0443   1
 -19   1   0 850.222 77.9574   2
  21  -1   0 21.9420 2.12170   2
 -21  -1   0 21.6981 2.21656   1
 -21  -1   0 18.2770 2.17748   3
 -21  -1   0 19.9611 2.05441   2
  21  -1   0 14.0303 2.22846   3
 -21   1   0 18.8849 2.16065   3
  21   1   0 19.4350 2.18518   1
 -21   1   0 20.8691 2.02380   2
  21   1   0 17.3679 2.02139   2
  23  -1   0 1885.77 171.094   3
 -23  -1   0 1836.42 170.971   1
 -23  -1   0 1828.99 170.892   2
 -23   1   0 1873.75 170.864   2
 -23   1   0 1979.83 171.029   1
  23   1   0 1957.75 170.910   2
 -23   1   0 1953.29 171.023   3
  23   1   0 1928.86 170.982   1
 -25  -1   0 85.5301 8.05214   2
  25  -1   0 81.9252 8.32260   3
 -25  -1   0 85.7753 8.16498   1
 -25   1   0 86.9490 8.00636   2
 -25   1   0 93.5663 8.26483   1
  27  -1   0 83.3173 7.58996   2
 -27  -1   0 76.3558 7.69559   1
 -27  -1   0 82.6374 7.72792   3
 -27  -1   0 79.0597 7.58057   2
 -27   1   0 83.8868 7.56682   2
 -27   1   0 81.4837 7.80641   1
  29  -1   0 5.73470 1.18166   2
 -29  -1   0 5.63391 1.20911   2
 -29  -1   0 5.88486 1.40038   1
 -29   1   0 5.70521 1.45518   1
 -29   1   0 6.58866 1.12863   2
 -31  -1   0 8.94700 1.61549   1
 -31  -1   0 9.21202 1.41665   2
 -31   1   0 8.16968 1.32512   2
 -31   1   0 7.66167 1.67575   1
 -33  -1   0 217.792 20.6148   1
 -33  -1   0 227.140 20.4853   2
 -33   1   0 232.800 20.4479   2
 -33   1   0 220.041 20.6583   1
 -35  -1   0 2.40543 1.36054   1
 -35  -1   0 2.33970 1.08586   2
 -35   1   0 4.24792 1.55623   1
 -35   1   0 3.96729 1.05970   2
 -37  -1   0 291.728 29.9567   1
 -37  -1   0 341.943 29.8578   2
 -37   1   0 346.005 30.0666   1
 -37   1   0 335.658 29.7964   2
 -39  -1   0 32.7360 3.38182   2
 -39  -1   0 33.6758 3.77814   1
 -39   1   0 27.9387 3.59584   1
 -39   1   0 29.5137 3.26060   2
 -41  -1   0 59.3065 6.12791   2
 -41  -1   0 69.2663 6.54100   1
 -41   1   0 62.6164 6.40582   1
 -41   1   0 62.1280 6.07639   2
 -43  -1   0 16.0475 2.35122   2
 -43  -1   0 18.2608 2.78449   1
 -43   1   0 17.5477 2.28628   2
 -43   1   0 18.4150 2.74382   1
 -45  -1   0 1.95666 1.75787   1
 -45  -1   0 0.73032 1.25656   2
 -45   1   0 0.64385 1.17423   2
 -45   1   0 2.34339 1.66331   1
 -47  -1   0 12.8898 2.06286   2
 -47  -1   0 11.7662 2.41271   1
 -47   1   0 11.4427 1.91266   2
 -47   1   0 11.0303 2.43534   1
 -49  -1   0 0.68666 1.77143   1
 -49  -1   0 0.35640 1.35659   2
 -49   1   0 2.23914 1.92086   1
 -49   1   0 0.26982 1.21688   2
 -51  -1   0 129.027 11.5849   1
 -51  -1   0 114.141 11.1707   2
 -51   1   0 117.796 11.1314   2
 -51   1   0 113.409 11.5446   1
 -53  -1   0 10.6205 1.94387   2
 -53  -1   0 7.21076 2.35470   1
 -53   1   0 10.9361 2.47300   1
 -53   1   0 9.55832 1.85226   2
 -55  -1   0 30.8655 4.04706   1
 -55  -1   0 31.3032 3.53708   2
 -55   1   0 26.8235 3.33127   2
 -55   1   0 26.0272 3.94938   1
 -57  -1   0 23.4636 3.54154   1
 -57  -1   0 19.3757 2.93956   2
 -57   1   0 24.9201 2.86992   2
 -57   1   0 18.5245 3.35104   1
 -59  -1   0 4.61585 2.35042   1
 -59  -1   0 0.59354 1.51626   2
 -59   1   0 1.60426 1.42625   2
 -59   1   0 -0.0492 1.97584   1
 -61  -1   0 -0.5625 2.04181   1
 -61  -1   0 0.53436 1.63533   2
 -61   1   0 -0.3274 1.39760   2
 -61   1   0 -1.4657 1.91895   1
   0  -2   0 3165.79 299.767   2
   0  -2   0 3605.58 299.773   1
   0   2   0 3531.71 299.512   1
   0   2   0 3054.20 299.619   2
   2  -2   0 2.75197 0.77741   2
  -2  -2   0 1.07043 0.98479   1
   2  -2   0 3.03351 0.43098   3
   2  -2   0 -1.2789 0.88762   1
  -2  -2   0 2.36730 0.71037   2
   2   2   0 1.73198 0.86299   1
  -2   2   0 2.63675 0.43646   3
  -2   2   0 3.05083 0.65315   2
   2   2   0 2.81752 0.64531   2
  -2   2   0 2.86256 0.85706   1
  -4  -2   0 -0.1087 0.79152   1
  -4  -2   0 0.63840 0.58045   2
   4  -2   0 0.12025 0.34040   3
  -4  -2   0 0.19293 0.26272   3
  -4   2   0 0.31397 0.35625   3
   4   2   0 0.57832 0.51811   2
  -4   2   0 1.64394 0.66697   1
  -4   2   0 -0.1789 0.54422   2
   4   2   0 0.33890 0.66245   1
   6  -2   0 1.73687 0.50092   3
  -6  -2   0 1.81424 0.73509   1
  -6  -2   0 1.47775 0.62134   2
  -6  -2   0 1.43809 0.40401   3
   6   2   0 1.15816 0.70530   1
   6   2   0 2.05916 0.59370   2
  -6   2   0 1.59815 0.47263   3
   8  -2   0 0.54101 0.52349   3
  -8  -2   0 0.65250 0.71089   1
  -8  -2   0 0.93281 0.41771   3
  -8  -2   0 -0.0899 0.56180   2
   8   2   0 2.10605 0.73312   1
   8   2   0 0.41309 0.53464   2
  -8   2   0 0.31076 0.47134   3
  10  -2   0 7.73572 1.13978   3
 -10  -2   0 8.39064 1.23595   1
 -10  -2   0 8.76451 1.05453   3
 -10  -2   0 8.91775 1.13336   2
  10   2   0 7.74127 1.06053   2
  10   2   0 10.1428 1.22890   1
 -10   2   0 9.38592 1.10971   3
 -12  -2   0 0.03735 0.77753   1
 -12  -2   0 0.33454 0.64832   2
 -12  -2   0 0.20390 0.46008   3
  12  -2   0 1.20430 0.68839   3
  12   2   0 -0.0829 0.08299   2
  12   2   0 0.90503 0.74702   1
 -12   2   0 0.46169 0.54945   3
 -14  -2   0 38.1800 3.54294   3
  14  -2   0 32.5804 3.60573   3
 -14  -2   0 33.1883 3.51067   2
 -14  -2   0 38.3756 3.60014   1
 -14   2   0 37.9773 3.57584   3
  14   2   0 39.0565 3.59195   1
  16  -2   0 21.8075 2.43410   3
 -16  -2   0 23.8494 2.32333   3
 -16  -2   0 21.5838 2.36837   1
 -16  -2   0 21.8959 2.28656   2
 -16   2   0 21.2506 2.21682   2
  16   2   0 25.9598 2.40668   1
 -16   2   0 19.0707 2.27429   3
 -18  -2   0 268.833 23.1329   3
  18  -2   0 248.064 23.2048   3
 -18  -2   0 239.771 23.1042   1
 -18  -2   0 259.830 23.0802   2
  18   2   0 258.502 23.1114   1
 -18   2   0 265.242 23.0280   2
 -18   2   0 245.030 23.1284   3
 -20  -2   0 9.71751 1.38044   1
 -20  -2   0 8.27555 1.22287   2
  20  -2   0 6.51613 1.35284   3
 -20  -2   0 7.67652 1.23952   3
 -20   2   0 7.96471 1.14020   2
  20   2   0 10.1380 1.43474   1
  20   2   0 7.56849 1.17897   2
 -22  -2   0 1.08366 0.74937   3
  22  -2   0 -0.1641 0.92183   3
 -22  -2   0 1.25445 0.80391   2
 -22  -2   0 2.97102 1.05151   1
 -22   2   0 1.70863 0.77908   2
  22   2   0 1.94378 1.05928   1
 -24  -2   0 37.7475 3.64043   2
 -24  -2   0 41.9199 3.78004   3
  24  -2   0 27.3245 3.80993   3
 -24  -2   0 39.5598 3.75334   1
 -24   2   0 36.6505 3.54272   2
  26  -2   0 7.79905 1.58650   3
 -26  -2   0 7.93294 1.40257   1
 -26  -2   0 6.78999 1.25551   2
 -26   2   0 8.49680 1.19286   2
 -28  -2   0 23.7352 2.60992   3
 -28  -2   0 23.0475 2.65448   1
 -28  -2   0 22.2500 2.55898   2
 -28   2   0 23.0721 2.43924   2
 -30  -2   0 2.87023 1.21066   1
 -30  -2   0 3.37568 1.03615   2
 -30  -2   0 2.53800 1.01104   3
 -30   2   0 2.26444 0.87508   2
 -32  -2   0 43.9093 4.32259   1
 -32  -2   0 40.3117 4.16318   2
 -32   2   0 39.1597 4.38062   1
 -32   2   0 41.8583 4.07126   2
 -34  -2   0 13.1578 2.11151   1
 -34  -2   0 14.6299 1.95717   2
 -34   2   0 13.7745 2.26052   1
 -34   2   0 15.2749 1.85157   2
 -36  -2   0 2.67725 1.14693   2
 -36  -2   0 3.89544 1.46395   1
 -36   2   0 5.00078 1.15794   2
 -36   2   0 3.88911 1.64488   1
 -38  -2   0 -0.3090 1.03629   2
 -38  -2   0 -0.6204 1.29787   1
 -38   2   0 -0.6538 1.40870   1
 -38   2   0 0.59454 0.95179   2
 -40  -2   0 -0.6110 1.39810   1
 -40  -2   0 1.18829 1.18961   2
 -40   2   0 -0.7279 0.94597   2
 -40   2   0 0.98691 1.43220   1
 -42  -2   0 21.8601 3.08091   1
 -42  -2   0 24.2087 2.86157   2
 -42   2   0 21.4082 3.14360   1
 -42   2   0 22.1787 2.58372   2
 -44  -2   0 -0.2233 1.54442   1
 -44  -2   0 1.03855 1.29710   2
 -44   2   0 1.01398 1.64504   1
 -44   2   0 -0.3460 1.04356   2
 -46  -2   0 19.9689 2.98912   1
 -46  -2   0 20.4650 2.65142   2
 -46   2   0 18.8021 2.41188   2
 -46   2   0 15.3389 2.85530   1
 -48  -2   0 9.75937 2.00522   2
 -48  -2   0 12.2495 2.43305   1
 -48   2   0 10.9681 1.76515   2
 -48   2   0 6.35656 2.12129   1
 -50  -2   0 7.88458 1.85277   2
 -50  -2   0 4.31002 2.06669   1
 -50   2   0 4.49957 1.47578   2
 -50   2   0 3.44034 1.98115   1
 -52  -2   0 1.80192 1.58002   2
 -52  -2   0 3.15799 1.98913   1
 -52   2   0 4.80664 2.01984   1
 -52   2   0 4.64344 1.43862   2
 -54  -2   0 -0.2027 1.89321   1
 -54  -2   0 1.62895 1.51123   2
 -54   2   0 -0.8557 1.20080   2
 -54   2   0 -0.4230 1.84238   1
 -56  -2   0 6.07600 1.91143   2
 -56  -2   0 5.79006 2.33698   1
 -56   2   0 6.86075 1.63086   2
 -56   2   0 2.17455 2.05532   1
 -58  -2   0 -0.9993 1.46441   2
 -58  -2   0 -1.0141 1.97056   1
 -58   2   0 -1.7595 1.91528   1
 -58   2   0 0.42595 1.31063   2
 -60  -2   0 11.6680 2.81792   1
 -60  -2   0 9.06102 2.20785   2
 -60   2   0 8.54218 1.87864   2
 -60   2   0 10.7419 2.73780   1
   1  -3   0 21.4739 2.37270   1
  -1  -3   0 22.2004 2.41179   1
   1  -3   0 21.1883 2.24195   2
  -1  -3   0 19.4622 2.18078   2
  -1   3   0 18.7631 2.09527   2
   1   3   0 22.8070 2.31235   1
   1   3   0 20.1341 2.09372   2
  -1   3   0 22.8852 2.32208   1
   3  -3   0 0.14397 0.33636   3
  -3  -3   0 0.24720 0.70658   2
  -3  -3   0 0.92455 0.91581   1
   3   3   0 0.82928 0.57084   2
  -3   3   0 0.98256 0.60191   2
  -3   3   0 0.88476 0.83443   1
   3   3   0 0.52261 0.77555   1
  -5  -3   0 38.3922 3.84854   3
  -5  -3   0 41.9311 4.05521   2
  -5  -3   0 43.0549 4.15939   1
   5  -3   0 42.4652 3.91890   3
  -5   3   0 40.3306 3.89122   3
   5   3   0 48.7458 4.14438   1
  -5   3   0 45.2584 4.08333   1
  -5   3   0 44.0469 3.97822   2
   5   3   0 41.8711 3.97734   2
  -7  -3   0 2.59919 0.82712   2
   7  -3   0 3.40572 0.65774   3
  -7  -3   0 4.53546 1.07950   1
  -7  -3   0 2.67403 0.49304   3
   7   3   0 4.10794 0.94682   1
  -7   3   0 4.88179 0.92796   1
  -7   3   0 2.24053 0.70294   2
  -7   3   0 2.24929 0.59083   3
   7   3   0 3.22185 0.75195   2
  -9  -3   0 223.760 21.1892   1
  -9  -3   0 212.844 21.1400   2
   9  -3   0 226.666 21.1380   3
  -9  -3   0 233.469 21.0680   3
  -9   3   0 235.892 21.1010   3
   9   3   0 263.556 21.2138   1
   9   3   0 241.265 21.1277   2
  11  -3   0 2.34809 0.76595   3
 -11  -3   0 2.54638 0.86317   2
 -11  -3   0 2.82610 0.96738   1
 -11  -3   0 2.57076 0.60548   3
  11   3   0 2.77796 0.77468   2
 -11   3   0 2.35716 0.70660   3
  11   3   0 3.56692 0.93084   1
 -13  -3   0 3.85294 0.98654   1
  13  -3   0 2.43004 0.81234   3
 -13  -3   0 2.18633 0.62124   3
 -13  -3   0 2.02182 0.80683   2
 -13   3   0 2.13356 0.71391   3
  13   3   0 1.90534 0.75923   2
  13   3   0 2.94652 0.91043   1
 -15  -3   0 21.1613 1.94202   1
  15  -3   0 13.3680 1.81844   3
 -15  -3   0 16.8178 1.75738   2
 -15  -3   0 12.7402 1.64243   3
  15   3   0 18.5293 1.89386   1
 -15   3   0 12.1435 1.65898   3
  15   3   0 14.1756 1.63758   2
 -17  -3   0 43.5060 4.56693   1
 -17  -3   0 45.1566 4.49121   2
  17  -3   0 44.6449 4.60811   3
 -17  -3   0 49.5946 4.49447   3
 -17   3   0 44.7184 4.49746   3
  17   3   0 51.7284 4.57041   1
 -19  -3   0 153.171 14.3660   3
  19  -3   0 161.779 14.5023   3
 -19  -3   0 139.587 14.3551   2
 -19  -3   0 161.821 14.4285   1
  19   3   0 170.663 14.4242   1
 -21  -3   0 1.30900 0.91208   2
 -21  -3   0 1.81659 1.05558   1
  21  -3   0 0.74057 0.95299   3
 -21  -3   0 1.11527 0.75262   3
 -21   3   0 0.83063 0.78158   2
 -23  -3   0 246.354 22.5496   2
 -23  -3   0 261.365 22.6115   3
  23  -3   0 250.253 22.7359   3
 -23  -3   0 228.718 22.5786   1
 -23   3   0 252.794 22.4555   2
 -25  -3   0 9.49402 1.44447   2
 -25  -3   0 7.97699 1.36261   3
 -25  -3   0 8.32599 1.54225   1
 -25   3   0 8.11446 1.23205   2
 -27  -3   0 74.2465 7.48759   2
 -27  -3   0 80.9027 7.58766   3
 -27  -3   0 83.4474 7.61357   1
 -27   3   0 79.3776 7.38127   2
 -29  -3   0 7.76453 1.61399   1
 -29  -3   0 7.87788 1.43226   2
 -29   3   0 7.70526 1.21350   2
 -31  -3   0 0.42236 0.96949   3
 -31  -3   0 5.02284 1.38939   1
 -31  -3   0 4.16598 1.21276   2
 -31   3   0 3.30559 0.95125   2
 -33  -3   0 42.9519 4.26286   1
 -33  -3   0 39.7931 4.13663   2
 -33  -3   0 41.1110 4.21323   3
 -33   3   0 36.8012 3.93121   2
 -35  -3   0 1.21739 1.33264   1
 -35  -3   0 2.08712 1.20258   2
 -35   3   0 1.40896 0.93757   2
 -37  -3   0 13.7216 2.11977   2
 -37  -3   0 18.2570 2.42207   1
 -37   3   0 14.3992 1.89600   2
 -39  -3   0 -0.7622 1.19727   2
 -39  -3   0 -0.0692 1.43925   1
 -39   3   0 0.36280 1.48502   1
 -39   3   0 -0.8580 0.93251   2
 -41  -3   0 43.7905 4.44425   1
 -41  -3   0 39.7391 4.20848   2
 -41   3   0 32.6355 4.38891   1
 -41   3   0 41.1048 4.02821   2
 -43  -3   0 29.9907 3.51869   2
 -43  -3   0 30.0124 3.71804   1
 -43   3   0 32.6127 3.35541   2
 -43   3   0 30.7371 3.92586   1
 -45  -3   0 8.59836 1.86183   2
 -45  -3   0 5.40976 1.98898   1
 -45   3   0 7.97338 2.13179   1
 -45   3   0 7.54349 1.49486   2
 -47  -3   0 3.25838 1.78706   1
 -47  -3   0 0.16517 1.49086   2
 -47   3   0 1.85263 1.73569   1
 -47   3   0 0.47372 1.12034   2
 -49  -3   0 -0.3465 1.78554   1
 -49  -3   0 -1.0691 1.50136   2
 -49   3   0 1.31333 1.81673   1
 -49   3   0 -0.3448 1.15987   2
 -51  -3   0 29.2831 3.26686   2
 -51  -3   0 20.6801 3.49516   1
 -51   3   0 21.8553 3.44667   1
 -51   3   0 25.5341 2.92098   2
 -53  -3   0 1.63459 1.62210   2
 -53  -3   0 2.78501 1.98238   1
 -53   3   0 1.77691 1.27878   2
 -53   3   0 1.53655 1.90958   1
 -55  -3   0 12.7135 2.79914   1
 -55  -3   0 13.5454 2.53568   2
 -55   3   0 16.8908 2.95694   1
 -55   3   0 12.6133 2.09519   2
 -57  -3   0 7.81835 2.13872   2
 -57  -3   0 7.52788 2.53779   1
 -57   3   0 8.48451 1.69566   2
 -57   3   0 8.73077 2.46268   1
 -59  -3   0 0.47664 2.10229   1
 -59  -3   0 1.17864 1.78274   2
 -59   3   0 0.69376 2.03793   1
 -59   3   0 0.78670 1.30761   2
   0  -4   0 1075.06 94.0221   1
   0  -4   0 950.474 93.8866   2
   0   4   0 1067.37 93.8565   2
   0   4   0 1091.39 93.9832   1
  -2  -4   0 53.1703 5.37114   1
   2  -4   0 55.0051 5.30225   1
   2  -4   0 52.9302 5.16575   2
  -2  -4   0 51.4298 5.16086   2
  -2   4   0 52.0756 5.21004   1
   2   4   0 54.2603 5.06635   2
  -2   4   0 52.8965 5.05619   2
   2   4   0 58.8513 5.26204   1
  -4  -4   0 279.630 25.3580   2
  -4  -4   0 270.616 25.4404   1
   4   4   0 281.291 25.2998   2
  -4   4   0 275.128 25.2800   2
   4   4   0 297.188 25.4365   1
  -4   4   0 277.233 25.4072   1
  -6  -4   0 52.1468 5.48196   1
  -6  -4   0 56.6215 5.15958   3
  -6  -4   0 55.2187 5.39581   2
  -6   4   0 60.5878 5.46762   1
  -6   4   0 55.5919 5.19602   3
   6   4   0 57.9820 5.48418   1
   6   4   0 56.3474 5.31736   2
  -6   4   0 57.9302 5.29076   2
  -8  -4   0 10.1532 1.13576   3
  -8  -4   0 9.05658 1.47481   2
  -8  -4   0 10.1230 1.64801   1
   8  -4   0 8.07290 1.25591   3
  -8   4   0 11.6019 1.55210   1
  -8   4   0 7.95510 1.20829   3
   8   4   0 13.3835 1.65621   1
   8   4   0 12.9827 1.41850   2
  -8   4   0 12.0367 1.34644   2
  10  -4   0 34.7572 3.45852   3
 -10  -4   0 32.1969 3.50307   2
 -10  -4   0 35.0207 3.65280   1
 -10  -4   0 34.1120 3.32931   3
 -10   4   0 35.7716 3.40048   2
  10   4   0 34.8982 3.44322   2
 -10   4   0 32.5594 3.37792   3
  10   4   0 43.0634 3.64447   1
 -10   4   0 37.0765 3.59935   1
 -12  -4   0 1.74164 1.01948   1
  12  -4   0 -1.1249 0.67511   3
 -12  -4   0 0.21324 0.89264   2
 -12  -4   0 -0.2922 0.52647   3
 -12   4   0 -0.5745 0.65858   3
  12   4   0 1.74215 0.95513   1
 -14  -4   0 155.363 14.6415   1
  14  -4   0 155.212 14.5925   3
 -14  -4   0 161.969 14.5981   2
 -14  -4   0 155.140 14.5037   3
 -14   4   0 151.250 14.5252   3
  14   4   0 182.305 14.6846   1
 -16  -4   0 3.99565 1.22584   1
 -16  -4   0 3.03764 0.78144   3
  16  -4   0 2.08878 0.98276   3
 -16  -4   0 3.54042 1.03696   2
  16   4   0 5.58214 1.74267   1
 -18  -4   0 136.217 13.1846   1
 -18  -4   0 145.572 13.1634   2
 -18  -4   0 146.070 13.1088   3
 -20  -4   0 86.5567 7.99909   1
 -20  -4   0 82.3358 7.92492   2
 -20  -4   0 84.1183 7.91595   3
 -22  -4   0 -1.1870 0.71949   3
 -22  -4   0 0.32437 1.01899   1
 -22  -4   0 -0.1606 0.91888   2
 -24  -4   0 -0.1263 0.93649   2
 -24  -4   0 -0.9046 0.75245   3
 -24  -4   0 1.82150 1.11878   1
 -24   4   0 0.41029 0.80094   2
 -26  -4   0 1.41226 1.21788   1
 -26  -4   0 0.07003 0.91247   3
 -26  -4   0 0.78128 1.02714   2
 -26   4   0 0.97015 0.81870   2
 -28  -4   0 61.0687 6.16677   1
 -28  -4   0 67.2372 6.13028   3
 -28  -4   0 51.7949 6.03490   2
 -28   4   0 66.8267 5.91397   2
 -30  -4   0 5.89521 1.43364   3
 -30  -4   0 10.1329 1.75368   1
 -30  -4   0 9.46701 1.60199   2
 -30   4   0 7.46635 1.25475   2
 -32  -4   0 77.7432 7.28861   2
 -32  -4   0 74.8861 7.36119   1
 -32   4   0 73.6356 7.04993   2
 -34  -4   0 40.6375 4.37787   2
 -34  -4   0 47.6493 4.57029   1
 -34  -4   0 41.3961 4.47998   3
 -34   4   0 40.1203 4.14854   2
 -36  -4   0 -0.1266 1.23773   2
 -36  -4   0 1.35311 1.50616   1
 -36  -4   0 -0.5784 1.45074   3
 -36   4   0 1.25774 0.94169   2
 -38  -4   0 2.08163 1.48264   1
 -38  -4   0 0.08357 1.25151   2
 -38   4   0 2.98608 1.05220   2
 -40  -4   0 0.16252 1.47711   1
 -40  -4   0 0.23026 1.32004   2
 -40   4   0 0.81698 1.01968   2
 -42  -4   0 22.1207 2.79214   2
 -42  -4   0 19.7080 2.96514   1
 -42   4   0 18.9563 2.40342   2
 -44  -4   0 2.22538 1.61280   2
 -44  -4   0 2.25076 1.73453   1
 -44   4   0 1.54285 1.13826   2
 -44   4   0 2.52547 1.82738   1
 -46  -4   0 20.9759 2.84259   2
 -46  -4   0 18.2355 3.01310   1
 -46   4   0 18.6219 2.34553   2
 -46   4   0 15.6323 2.94526   1
 -48  -4   0 12.1410 2.28336   2
 -48  -4   0 12.0160 2.54422   1
 -48   4   0 13.5638 2.61985   1
 -48   4   0 10.8343 1.81323   2
 -50  -4   0 2.60745 1.70248   2
 -50  -4   0 0.53735 1.84916   1
 -50   4   0 3.22343 1.97338   1
 -50   4   0 0.81216 1.18029   2
 -52  -4   0 0.26721 1.92817   1
 -52  -4   0 2.32056 1.81780   2
 -52   4   0 1.95330 1.94744   1
 -52   4   0 3.22694 1.25312   2
 -54  -4   0 2.86610 1.81355   2
 -54  -4   0 0.92816 2.03585   1
 -54   4   0 2.75094 2.01007   1
 -54   4   0 2.56196 1.28055   2
 -56  -4   0 -0.2521 1.71919   2
 -56  -4   0 -0.3812 2.18082   1
 -56   4   0 2.09716 1.36786   2
 -56   4   0 0.02068 1.96904   1
 -58  -4   0 -1.3825 1.85830   1
 -58  -4   0 0.11071 1.76614   2
 -58   4   0 -1.4705 1.97808   1
  -1  -5   0 -0.8034 1.03461   2
   1  -5   0 -0.8629 1.06065   2
  -1  -5   0 -0.0745 1.34452   1
   1  -5   0 -0.1826 1.30727   1
   1   5   0 -0.5174 0.99891   1
   1   5   0 0.50756 0.72813   2
  -1   5   0 0.07307 1.03804   1
  -1   5   0 -0.0360 0.74080   2
  -3  -5   0 31.2456 3.24814   1
  -3  -5   0 25.7499 2.96346   2
  -3   5   0 28.0909 2.85289   2
   3   5   0 28.2722 3.06204   2
  -3   5   0 28.2998 3.25054   1
   3   5   0 28.1780 3.09169   1
  -5  -5   0 41.6654 4.36824   2
  -5  -5   0 45.6134 4.54948   1
   5   5   0 44.1771 4.41998   1
  -5   5   0 43.3771 4.19057   2
  -7  -5   0 0.55037 1.16857   1
  -7  -5   0 -0.6511 0.97289   2
  -7  -5   0 -1.0028 0.39443   3
  -7   5   0 0.36463 0.73402   2
  -9  -5   0 35.9048 3.36078   3
  -9  -5   0 34.7120 3.64157   2
  -9  -5   0 37.3572 3.83174   1
  -9   5   0 35.7042 3.40474   3
  -9   5   0 33.7117 3.45933   2
 -11  -5   0 13.2192 1.76734   2
 -11  -5   0 14.5649 1.95111   1
 -11  -5   0 11.2302 1.40967   3
 -11   5   0 11.6583 1.50433   3
 -11   5   0 14.0579 1.53133   2
 -13  -5   0 7.59454 1.51288   1
 -13  -5   0 7.16832 1.35401   2
 -13  -5   0 5.84525 0.93584   3
 -13   5   0 6.14711 1.13344   3
 -13   5   0 7.52646 1.12782   2
 -15  -5   0 0.98578 0.99189   2
 -15  -5   0 0.11727 0.57381   3
 -15  -5   0 2.91122 1.22830   1
 -15   5   0 0.81629 0.70467   2
 -17  -5   0 12.4735 1.61403   3
 -17  -5   0 11.6335 1.83886   2
 -17  -5   0 15.3944 2.02081   1
 -19  -5   0 25.9980 3.13985   2
 -19  -5   0 31.6129 3.22145   1
 -19  -5   0 27.9075 2.94862   3
 -21  -5   0 -0.7465 0.73792   3
 -21  -5   0 2.00770 1.12760   2
 -21  -5   0 1.14439 1.20497   1
 -23  -5   0 6.16733 1.19404   3
 -23  -5   0 6.06219 1.43926   2
 -23  -5   0 5.09339 1.45949   1
 -25  -5   0 6.36623 1.45853   1
 -25  -5   0 2.10510 1.22586   2
 -25  -5   0 0.97903 1.02459   3
 -27  -5   0 0.47990 1.14967   2
 -27  -5   0 -0.6460 0.94068   3
 -27  -5   0 1.83435 1.31974   1
 -27   5   0 0.08238 0.92037   2
 -29  -5   0 0.27353 1.21272   2
 -29  -5   0 1.22827 1.31941   1
 -29  -5   0 -1.7189 0.93686   3
 -29   5   0 2.01581 0.99208   2
 -31  -5   0 6.39420 1.56199   3
 -31  -5   0 9.45854 1.88093   1
 -31  -5   0 6.09393 1.66865   2
 -31   5   0 9.37506 1.41766   2
 -33  -5   0 4.19867 1.54160   2
 -33  -5   0 7.51714 1.76886   1
 -33   5   0 7.07682 1.29627   2
 -35  -5   0 1.85305 1.44126   2
 -35  -5   0 3.91168 1.64828   1
 -35   5   0 1.36861 0.97948   2
 -37  -5   0 -0.9298 1.40388   1
 -37  -5   0 0.87947 1.36599   2
 -37   5   0 -0.8351 0.92729   2
 -39  -5   0 -0.0201 1.42841   2
 -39  -5   0 -0.5317 1.55501   1
 -39   5   0 2.79803 1.07691   2
 -41  -5   0 -0.4535 1.54103   1
 -41  -5   0 -0.9414 1.35777   2
 -41   5   0 3.39714 1.12171   2
 -43  -5   0 -0.7852 1.58248   1
 -43  -5   0 -0.7112 1.47013   2
 -43   5   0 0.67164 1.06607   2
 -45  -5   0 0.51314 1.57021   2
 -45  -5   0 5.63469 1.96009   1
 -45   5   0 5.43138 1.29305   2
 -47  -5   0 4.54149 2.09986   1
 -47  -5   0 7.19676 1.94950   2
 -47   5   0 4.13270 1.34481   2
 -47   5   0 6.14759 2.23580   1
 -49  -5   0 1.36722 1.84770   2
 -49  -5   0 3.99568 2.07784   1
 -49   5   0 3.79914 1.24312   2
 -49   5   0 1.18322 2.01932   1
 -51  -5   0 4.83160 1.98772   2
 -51  -5   0 3.43507 2.19402   1
 -51   5   0 7.89365 2.30542   1
 -53  -5   0 3.94681 2.15977   1
 -53  -5   0 3.68250 2.03177   2
 -53   5   0 2.60728 2.09703   1
 -55  -5   0 0.62343 1.82697   2
 -55  -5   0 -0.8247 1.95491   1
 -55   5   0 1.42797 2.06096   1
   0  -6   0 26.9357 3.20617   2
   0  -6   0 31.6837 3.35420   1
  -2  -6   0 6.29109 1.52531   2
  -2  -6   0 7.89753 1.80672   1
  -4  -6   0 2.93794 1.35634   2
  -4  -6   0 4.33058 1.58636   1
  -6  -6   0 -0.5008 1.32051   1
  -6  -6   0 -0.4699 1.07595   2
  -8  -6   0 1.20213 1.36441   1
  -8  -6   0 0.76878 1.15605   2
 -10  -6   0 6.03337 1.55561   1
 -10  -6   0 4.40158 0.73076   3
 -10  -6   0 3.16587 1.32003   2
 -12  -6   0 -1.1289 0.52150   3
 -12  -6   0 0.64251 1.13353   2
 -12  -6   0 1.34225 1.35654   1
 -14  -6   0 5.17212 1.57917   1
 -14  -6   0 4.96212 0.90743   3
 -14  -6   0 5.06686 1.42525   2
 -16  -6   0 6.02191 1.56945   1
 -16  -6   0 4.44680 1.32419   2
 -16  -6   0 3.18010 0.87876   3
 -18  -6   0 22.4757 2.76427   1
 -18  -6   0 21.0553 2.65121   2
 -18  -6   0 19.2555 2.25616   3
 -20  -6   0 -0.6837 1.20194   2
 -20  -6   0 -1.1839 0.70050   3
 -20  -6   0 0.89794 1.33235   1
 -22  -6   0 4.51544 1.14309   3
 -22  -6   0 6.42533 1.65793   1
 -22  -6   0 4.48671 1.49307   2
 -24  -6   0 0.75073 1.25835   2
 -24  -6   0 -0.3693 0.85038   3
 -24  -6   0 1.02094 1.34094   1
 -26  -6   0 3.36387 1.51278   1
 -26  -6   0 -0.0598 1.04158   3
 -26  -6   0 1.85923 1.34049   2
 -28  -6   0 4.09272 1.60448   1
 -28  -6   0 1.27863 1.24200   3
 -28  -6   0 2.76818 1.49588   2
 -30  -6   0 0.28115 1.44100   2
 -30  -6   0 2.35753 1.53729   1
 -30   6   0 0.89714 1.06587   2
 -32  -6   0 3.80604 1.58401   2
 -32  -6   0 4.64748 1.72975   1
 -32   6   0 2.48953 1.17803   2
 -34  -6   0 1.93814 1.69469   1
 -34  -6   0 0.98865 1.47478   2
 -34   6   0 2.63938 1.12981   2
 -36  -6   0 5.11363 1.88093   1
 -36  -6   0 5.86139 1.84208   2
 -36   6   0 4.97702 1.26252   2
 -38  -6   0 -0.5725 1.48167   2
 -38  -6   0 3.34906 1.80336   1
 -38   6   0 3.25780 1.10752   2
 -40  -6   0 3.09649 1.68264   2
 -40  -6   0 3.42876 1.92859   1
 -40   6   0 4.88515 1.21494   2
 -42  -6   0 4.15604 1.76360   2
 -42  -6   0 0.57232 1.62312   1
 -42   6   0 3.19062 1.21244   2
 -44  -6   0 -0.5242 1.76742   1
 -44  -6   0 0.52049 1.69901   2
 -44   6   0 0.74942 1.05935   2
 -46  -6   0 0.90805 1.86628   1
 -46  -6   0 -0.9656 1.61195   2
 -48  -6   0 4.43565 1.96793   2
 -48  -6   0 0.83336 1.94554   1
 -50  -6   0 2.88934 2.00422   1
 -50  -6   0 2.00199 1.86960   2
 -50   6   0 3.35213 2.20720   1
 -52  -6   0 -3.7109 1.88914   1
 -52  -6   0 -1.9026 1.70843   2
 -52   6   0 0.64036 2.09363   1
  -1  -7   0 10.0578 2.06175   1
  -1  -7   0 8.98744 1.87105   2
  -3  -7   0 0.34563 1.54798   1
  -3  -7   0 0.52586 1.32413   2
  -5  -7   0 24.8919 3.08620   2
  -5  -7   0 24.3544 3.27203   1
  -7  -7   0 0.86578 1.43042   2
  -7  -7   0 -2.2445 1.50351   1
  -9  -7   0 21.1244 2.72075   2
  -9  -7   0 17.8646 2.78511   1
 -11  -7   0 2.52609 1.59840   1
 -11  -7   0 -0.7229 1.22724   2
 -13  -7   0 13.2944 1.57808   3
 -13  -7   0 15.6972 2.37467   1
 -13  -7   0 14.9082 2.21715   2
 -15  -7   0 0.56977 1.43471   1
 -15  -7   0 2.54325 1.39803   2
 -15  -7   0 -0.9824 0.67952   3
 -17  -7   0 2.88441 0.95482   3
 -17  -7   0 3.42288 1.63684   1
 -17  -7   0 4.89992 1.54709   2
 -19  -7   0 -0.8415 0.77866   3
 -19  -7   0 -1.7497 1.25762   2
 -19  -7   0 -0.0656 1.49843   1
 -21  -7   0 7.53089 1.70019   2
 -21  -7   0 3.40488 1.15179   3
 -21  -7   0 8.78039 1.91933   1
 -23  -7   0 19.6219 2.90611   2
 -23  -7   0 23.8621 3.09952   1
 -25  -7   0 1.78554 1.60831   1
 -25  -7   0 1.36211 1.50603   2
 -27  -7   0 22.4295 3.06444   1
 -27  -7   0 20.3191 2.94336   2
 -29  -7   0 1.77028 1.55711   1
 -29  -7   0 0.51583 1.48676   2
 -31  -7   0 0.41176 1.57224   1
 -31  -7   0 0.31150 1.44954   2
 -31   7   0 0.41729 1.11770   2
 -33  -7   0 6.29890 1.92237   1
 -33  -7   0 7.67496 1.97951   2
 -33   7   0 6.03481 1.40954   2
 -35  -7   0 -2.7096 1.56283   1
 -35  -7   0 0.67083 1.50933   2
 -35   7   0 -1.4282 1.05718   2
 -37  -7   0 23.5438 3.24164   1
 -37  -7   0 20.0892 3.08185   2
 -37   7   0 20.7735 2.55004   2
 -39  -7   0 3.09869 1.73470   2
 -39  -7   0 5.58733 1.97319   1
 -41  -7   0 10.3835 2.39280   1
 -41  -7   0 8.28692 2.25598   2
 -43  -7   0 0.96350 1.66454   2
 -43  -7   0 0.67834 1.95269   1
 -45  -7   0 0.03312 1.76903   1
 -45  -7   0 -1.4246 1.71138   2
 -47  -7   0 -2.0428 1.80123   2
 -47  -7   0 1.90970 2.06748   1
  -4  -8   0 38.7900 4.48333   1
  -4  -8   0 38.6682 4.31872   2
  -6  -8   0 -3.1465 1.42593   2
  -6  -8   0 -2.4776 1.71366   1
  -8  -8   0 0.27986 1.49008   2
  -8  -8   0 0.14905 1.77492   1
 -10  -8   0 19.4933 2.97863   2
 -10  -8   0 23.7130 3.19670   1
 -12  -8   0 1.85130 1.65419   2
 -12  -8   0 -1.2819 1.71163   1
 -14  -8   0 75.1439 7.36626   2
 -14  -8   0 73.0047 7.48100   1
 -16  -8   0 3.41134 1.29167   3
 -16  -8   0 6.95482 1.90634   2
 -16  -8   0 2.18531 1.83624   1
 -18  -8   0 57.2285 6.33370   2
 -18  -8   0 66.4613 6.45587   1
 -20  -8   0 3.61675 1.80227   2
 -20  -8   0 5.90686 1.95138   1
 -22  -8   0 7.99116 2.14898   1
 -22  -8   0 7.67297 2.00110   2
 -24  -8   0 3.34376 1.79221   2
 -24  -8   0 2.36054 1.74533   1
 -26  -8   0 -0.0663 1.65642   1
 -26  -8   0 0.92681 1.70318   2
 -28  -8   0 6.43539 2.04727   2
 -28  -8   0 9.83155 2.19055   1
 -30  -8   0 1.74319 1.67012   2
 -30  -8   0 3.92984 1.92823   1
 -32  -8   0 7.44949 2.19824   2
 -32  -8   0 12.4275 2.46337   1
 -34  -8   0 3.66283 1.99018   1
 -34  -8   0 2.35314 1.78301   2
 -36  -8   0 5.83112 2.08603   2
 -36  -8   0 8.36145 2.28258   1
 -38  -8   0 0.09686 1.72775   2
 -38  -8   0 -1.2089 1.75758   1
 -40  -8   0 1.27727 1.85302   2
 -40  -8   0 3.25476 2.06853   1
 -42  -8   0 5.48309 2.25765   1
 -42  -8   0 2.18377 2.02530   2
  -7  -9   0 -0.8184 1.77531   1
  -7  -9   0 0.77268 1.66413   2
  -9  -9   0 17.3567 2.80701   2
  -9  -9   0 15.8206 2.91713   1
 -11  -9   0 -2.9284 1.72476   1
 -11  -9   0 -0.2881 1.67199   2
 -13  -9   0 4.53068 2.00430   1
 -13  -9   0 2.74134 1.75718   2
 -15  -9   0 0.97683 1.79503   2
 -15  -9   0 0.49739 1.76889   1
 -17  -9   0 1.04144 1.84194   1
 -17  -9   0 1.90740 1.82090   2
 -19  -9   0 14.9298 2.79444   1
 -19  -9   0 18.9851 2.90301   2
 -21  -9   0 -2.0671 1.53357   2
 -21  -9   0 2.69420 1.76433   1
 -23  -9   0 39.8374 4.81319   2
 -23  -9   0 43.7413 4.83084   1
 -25  -9   0 2.28679 1.96063   1
 -25  -9   0 1.19942 1.84923   2
 -27  -9   0 11.8954 2.43444   2
 -27  -9   0 7.87570 2.25610   1
 -29  -9   0 1.44555 1.95876   1
 -29  -9   0 0.34906 1.85812   2
 -31  -9   0 1.95461 1.92716   1
 -31  -9   0 0.33715 1.75868   2
 -33  -9   0 13.9317 2.77508   2
 -33  -9   0 12.5851 2.78347   1
 -35  -9   0 2.68510 1.93784   2
 -35  -9   0 -0.4233 2.01860   1
 -37  -9   0 30.4173 4.08351   1
 -37  -9   0 27.4810 4.02902   2
 -10 -10   0 6.02306 2.14462   2
 -10 -10   0 5.90586 2.20205   1
 -12 -10   0 -1.7244 1.83517   1
 -12 -10   0 1.19580 1.82551   2
 -14 -10   0 41.6630 5.19193   2
 -14 -10   0 51.1923 5.43373   1
 -16 -10   0 3.06907 2.13151   2
 -16 -10   0 -1.2574 1.95752   1
 -18 -10   0 60.6625 6.31083   1
 -18 -10   0 54.4406 6.24003   2
 -20 -10   0 9.16076 2.47764   1
 -20 -10   0 11.4756 2.61273   2
 -22 -10   0 8.46673 2.42267   1
 -22 -10   0 5.73571 2.25529   2
 -24 -10   0 3.03002 2.07969   1
 -24 -10   0 0.72389 1.89120   2
 -26 -10   0 1.30599 2.01812   2
 -26 -10   0 1.37564 2.07777   1
 -62   0   1 -1.1207 2.06977   1
 -62   0   1 -1.9581 1.39185   2
 -60   0   1 0.40748 1.48227   2
 -60   0   1 -0.6513 1.97898   1
 -58   0   1 0.79527 1.46374   2
 -58   0   1 1.18559 2.08256   1
 -56   0   1 -1.2969 1.37358   2
 -56   0   1 1.20772 2.02970   1
 -54   0   1 -1.6679 1.21627   2
 -54   0   1 -0.2171 1.77865   1
 -52   0   1 3.62685 2.07401   1
 -52   0   1 2.37043 1.49677   2
 -50   0   1 0.34712 1.26666   2
 -50   0   1 0.04480 1.78515   1
 -48   0   1 1.43027 1.26752   2
 -48   0   1 -0.9750 1.76338   1
 -46   0   1 -0.3833 1.24754   2
 -46   0   1 0.30826 1.68123   1
 -44   0   1 -0.8319 1.09219   2
 -44   0   1 -0.0297 1.52295   1
 -42   0   1 -0.8909 1.04655   2
 -42   0   1 2.74552 1.60465   1
 -40   0   1 -0.8252 0.97989   2
 -40   0   1 0.60396 1.46561   1
 -38   0   1 2.61832 1.15008   2
 -38   0   1 1.18106 1.44731   1
 -36   0   1 1.08721 0.97010   2
 -36   0   1 2.58229 1.46119   1
 -34   0   1 1.65847 0.98041   2
 -34   0   1 1.49554 1.32495   1
 -32   0   1 1.30918 0.90370   2
 -32   0   1 2.66799 1.29485   1
 -30   0   1 0.56144 1.15758   1
 -30   0   1 1.31604 0.84804   2
  28   0  -1 1.11820 1.10243   2
 -28   0   1 1.30194 0.88608   2
 -28   0   1 2.32054 1.20784   1
 -26   0   1 1.11481 1.08720   1
 -26   0   1 0.17582 0.72230   2
  26   0  -1 -0.4096 0.73947   2
 -26   0   1 -1.4241 0.73581   3
 -24   0   1 0.04091 0.86921   3
  24   0  -1 -0.0095 0.71327   2
 -24   0   1 -0.0270 0.86942   2
 -24   0   1 1.72257 1.12755   1
 -22   0   1 0.36495 0.93875   1
 -22   0   1 1.25931 0.74320   2
 -22   0   1 -0.5251 0.47251   3
  22   0  -1 1.18002 0.53328   2
 -20   0   1 -0.5606 0.86641   1
 -20   0   1 0.33024 0.66885   2
  20   0  -1 0.87143 0.66914   2
 -20   0   1 -1.2486 0.59418   3
 -18   0   1 2.47187 0.73237   2
 -18   0   1 3.75128 1.02583   1
 -18   0   1 2.47070 0.81974   3
  18   0  -1 2.46922 0.75612   2
 -16   0   1 2.09523 0.63008   2
 -16   0   1 0.23221 0.62833   3
 -16   0   1 2.24016 0.88539   1
  16   0  -1 1.60509 0.61103   2
 -14   0   1 1.97936 0.86460   3
  14   0  -1 3.60080 0.76001   2
 -14   0   1 2.80099 0.69643   2
 -14   0   1 3.82800 0.93890   1
  12   0  -1 -2.8553 0.45557   1
 -12   0   1 -3.3850 0.69872   1
 -12   0   1 -2.8930 0.55269   3
 -12   0   1 -3.2818 0.48439   2
  12   0  -1 -2.8405 0.51035   2
 -10   0   1 0.38651 0.69603   1
 -10   0   1 -0.4801 0.47775   2
  10   0  -1 0.17655 0.66152   1
  10   0  -1 0.07922 0.47929   2
 -10   0   1 -0.8052 0.53484   3
   8   0  -1 0.02547 0.53530   1
  -8   0   1 0.82834 0.53700   1
   8   0  -1 0.38521 0.40882   2
  -8   0   1 0.03306 0.35064   2
  -6   0   1 0.04503 0.21537   2
   6   0  -1 0.23742 0.37456   1
   6   0  -1 -0.0769 0.24894   2
  -6   0   1 0.04623 0.34706   1
  -4   0   1 -1.4752 0.13416   1
  -4   0   1 -1.5444 0.07599   2
   4   0  -1 -1.6105 0.24263   1
   4   0  -1 -1.6929 0.15950   2
  -2   0   1 -1.3665 0.02082   1
  -2   0   1 -1.3666 0.01329   2
   2   0  -1 -1.3642 0.10807   2
   2   0  -1 -1.2708 0.13589   1
  -2   0  -1 -1.5601 0.20409   3
  -2   0  -1 -1.5835 0.06149   2
   2   0   1 -1.5755 0.03262   3
   2   0   1 -1.5890 0.02906   2
  -4   0  -1 -1.4905 0.13430   2
   4   0   1 -1.5611 0.13199   3
  -4   0  -1 -1.6583 0.26133   3
   4   0   1 -1.3806 0.24018   2
  -6   0  -1 0.01466 0.29490   2
   6   0   1 -0.5353 0.31445   3
  -6   0  -1 -0.2775 0.34816   3
   6   0   1 0.06193 0.34115   2
   8   0   1 -0.1998 0.45940   2
   8   0   1 -0.4501 0.50461   3
  -8   0  -1 0.10469 0.48219   2
  -8   0  -1 -0.4891 0.48758   3
 -10   0  -1 -0.0410 0.75064   1
 -10   0  -1 -0.6788 0.60575   3
  10   0   1 -0.0914 0.57943   2
  10   0   1 0.07061 0.65679   3
 -10   0  -1 -0.1170 0.58852   2
 -12   0  -1 -2.5468 0.60533   2
 -12   0  -1 -3.2650 0.76245   1
 -12   0  -1 -2.6813 0.56544   3
  12   0   1 -2.6445 0.62349   3
  12   0   1 -2.5794 0.58288   2
  14   0   1 0.25668 0.74311   2
 -14   0  -1 1.65491 0.98190   1
  14   0   1 2.52944 0.84829   3
 -14   0  -1 0.47384 0.75934   2
 -14   0  -1 2.38891 0.78409   3
 -16   0  -1 1.07370 0.73657   2
  16   0   1 2.05819 0.70663   2
 -16   0  -1 0.91120 0.70530   3
  16   0   1 0.72112 0.85411   3
 -16   0  -1 1.38763 0.94824   1
 -18   0  -1 0.82936 0.84522   2
  18   0   1 1.91046 0.79963   2
 -18   0  -1 1.68959 1.06510   1
  18   0   1 2.63736 0.98542   3
 -18   0  -1 1.85584 0.84676   3
 -20   0  -1 -1.0079 0.65363   3
 -20   0  -1 0.57958 0.94267   1
  20   0   1 0.98025 0.66522   2
  20   0   1 -0.5508 0.98655   3
 -20   0  -1 0.70264 0.77514   2
  22   0   1 0.88320 1.12313   3
 -22   0  -1 0.99706 1.03500   1
 -22   0  -1 -0.2604 0.52012   3
  22   0   1 -0.1589 0.49529   2
 -22   0  -1 1.41424 0.80459   2
 -24   0  -1 0.33172 0.89037   3
  24   0   1 1.86448 1.21918   3
 -24   0  -1 2.02770 0.96262   2
  24   0   1 2.88244 0.91966   2
 -24   0  -1 0.37765 1.20406   1
  26   0   1 0.43689 0.81264   2
  26   0   1 -1.2790 0.96351   3
 -26   0  -1 0.23170 0.78208   2
 -26   0  -1 -1.0017 0.75372   3
 -26   0  -1 0.44545 1.12901   1
 -28   0  -1 0.76140 0.91318   2
  28   0   1 -0.5528 1.20381   3
 -28   0  -1 0.82239 1.20066   1
 -30   0  -1 0.25212 1.12369   1
 -30   0  -1 0.28122 0.91162   2
  30   0   1 -0.2823 1.19064   3
  32   0   1 2.68201 1.34207   3
 -32   0  -1 1.96194 1.28855   1
 -32   0  -1 0.90866 0.96131   2
 -34   0  -1 2.84084 1.05461   2
 -34   0  -1 1.32066 1.37310   1
 -36   0  -1 0.69934 1.34708   1
 -36   0  -1 0.81182 0.98922   2
 -38   0  -1 -0.0069 1.08846   2
 -38   0  -1 1.24132 1.50281   1
 -40   0  -1 -0.0672 1.06076   2
 -40   0  -1 0.03852 1.46100   1
 -42   0  -1 2.68884 1.31531   2
 -42   0  -1 -0.6120 1.57666   1
 -44   0  -1 -1.2721 1.64060   1
 -44   0  -1 -0.3574 1.19083   2
 -46   0  -1 -0.0998 1.26368   2
 -46   0  -1 1.56888 1.81406   1
 -48   0  -1 2.23112 1.35040   2
 -48   0  -1 -1.1988 1.62025   1
 -50   0  -1 0.01607 1.76291   1
 -50   0  -1 0.64336 1.28646   2
 -52   0  -1 0.45003 1.34848   2
 -52   0  -1 -0.7292 1.82349   1
 -54   0  -1 -1.1837 1.91553   1
 -54   0  -1 -0.4928 1.31287   2
 -56   0  -1 1.79891 1.50512   2
 -56   0  -1 0.95131 2.09271   1
 -58   0  -1 -3.1969 1.23953   2
 -58   0  -1 -2.4027 1.83381   1
 -60   0  -1 2.10462 2.23660   1
 -60   0  -1 -0.5844 1.47839   2
 -62   0  -1 -0.1580 1.45433   2
 -62   0  -1 -2.2393 2.11747   1
 -61  -1   1 -1.0229 2.05787   1
 -61  -1   1 -2.1177 1.50038   2
 -61   1   1 -0.4067 2.16945   1
 -61   1   1 -0.4661 1.29023   2
 -59  -1   1 1.38076 1.56582   2
 -59  -1   1 -0.8094 2.08243   1
 -59   1   1 4.22117 2.32167   1
 -59   1   1 5.90097 1.61948   2
 -57  -1   1 0.58731 1.48078   2
 -57  -1   1 0.73978 2.01482   1
 -57   1   1 0.93169 2.11087   1
 -57   1   1 -2.3465 1.24698   2
 -55  -1   1 3.58652 1.63917   2
 -55  -1   1 2.82347 2.10020   1
 -55   1   1 3.14402 2.04959   1
 -55   1   1 2.26003 1.42573   2
 -53  -1   1 4.02960 1.55780   2
 -53  -1   1 1.87102 1.87274   1
 -53   1   1 3.07570 1.39370   2
 -53   1   1 2.40416 1.90863   1
 -51  -1   1 2.03139 1.53901   2
 -51  -1   1 1.68922 1.89782   1
 -51   1   1 3.96606 1.96000   1
 -51   1   1 1.35550 1.38150   2
 -49  -1   1 14.3090 2.28508   2
 -49  -1   1 17.2419 2.76582   1
 -49   1   1 15.5707 2.18933   2
 -49   1   1 14.9679 2.67784   1
 -47  -1   1 0.77730 1.71122   1
 -47  -1   1 2.65589 1.35692   2
 -47   1   1 4.01428 1.84779   1
 -47   1   1 3.90579 1.33024   2
 -45  -1   1 20.4799 2.56851   2
 -45  -1   1 15.5223 2.77663   1
 -45   1   1 20.9452 2.48696   2
 -45   1   1 18.8931 2.91823   1
 -43  -1   1 6.64578 1.61189   2
 -43  -1   1 8.97251 2.05504   1
 -43   1   1 8.55025 2.01615   1
 -43   1   1 8.78959 1.56104   2
 -41  -1   1 15.0888 2.12666   2
 -41  -1   1 15.3231 2.47615   1
 -41   1   1 14.4392 2.40075   1
 -41   1   1 16.0931 2.04938   2
 -39  -1   1 12.9014 2.21950   1
 -39  -1   1 12.8187 1.88663   2
 -39   1   1 14.8473 2.31175   1
 -39   1   1 13.0329 1.83034   2
 -37  -1   1 4.90422 1.24556   2
 -37  -1   1 3.78088 1.61281   1
 -37   1   1 3.35146 1.13710   2
 -37   1   1 4.79947 1.71524   1
 -35  -1   1 44.4495 4.26686   2
 -35  -1   1 42.2004 4.45072   1
 -35   1   1 42.9206 4.49557   1
 -35   1   1 39.6603 4.14548   2
 -33  -1   1 7.01909 1.55410   1
 -33  -1   1 5.93161 1.28349   2
 -33   1   1 7.01801 1.61557   1
 -33   1   1 5.28455 1.15569   2
 -31  -1   1 59.5488 6.14375   1
 -31  -1   1 64.9487 5.98277   2
 -31   1   1 58.8867 6.17313   1
 -31   1   1 65.2322 5.92964   2
  29  -1  -1 65.2044 5.85080   2
 -29  -1   1 61.9168 5.87180   2
 -29  -1   1 59.6998 6.04745   1
 -29   1   1 61.4799 6.05543   1
 -29   1   1 59.1071 5.80234   2
 -27  -1   1 35.2204 4.12442   3
 -27  -1   1 43.9830 4.28426   1
  27  -1  -1 39.9939 4.00724   2
 -27  -1   1 39.8397 4.02483   2
 -27   1   1 45.6625 4.03230   2
 -27   1   1 45.5964 4.29820   1
 -25  -1   1 98.7392 10.0664   2
 -25  -1   1 113.207 10.2331   1
 -25   1   1 121.774 10.0791   2
 -25   1   1 107.284 10.2397   1
  25   1  -1 107.063 10.1531   2
  23  -1  -1 24.4601 2.58398   2
 -23  -1   1 31.0480 2.91711   1
 -23  -1   1 25.6826 2.62758   2
  23   1  -1 24.6533 2.58752   2
 -23   1   1 20.7436 2.66700   3
 -23   1   1 24.3234 2.85354   1
 -23   1   1 28.4980 2.62853   2
  23   1  -1 23.6526 2.71313   1
  21  -1  -1 170.580 15.2537   2
 -21  -1   1 160.148 15.3665   1
 -21  -1   1 169.121 15.2771   2
 -21  -1   1 188.106 15.4186   3
 -21   1   1 163.001 15.3938   1
 -21   1   1 169.777 15.2379   2
  21   1  -1 149.303 15.3244   1
 -21   1   1 171.419 15.3825   3
 -19  -1   1 2.37985 0.75364   2
 -19  -1   1 4.20464 0.99707   1
  19  -1  -1 3.56950 0.78360   2
 -19  -1   1 2.22019 0.76180   3
 -19   1   1 2.87014 0.72509   2
 -19   1   1 3.92853 1.12903   1
  19   1  -1 0.07059 0.52548   2
  19   1  -1 4.04448 0.96604   1
  17  -1  -1 195.220 17.2754   2
 -17  -1   1 189.961 17.3879   3
 -17  -1   1 179.839 17.3418   1
 -17  -1   1 183.334 17.2828   2
  17   1  -1 196.369 17.2952   2
 -17   1   1 197.348 17.2618   2
  17   1  -1 194.757 17.3586   1
 -15  -1   1 187.940 17.4582   3
 -15  -1   1 175.639 17.4161   1
  15  -1  -1 194.010 17.3563   2
 -15  -1   1 188.322 17.3811   2
 -15   1   1 209.450 17.3567   2
  15   1  -1 201.971 17.4493   1
  15   1  -1 188.002 17.3700   2
 -13  -1   1 98.5060 9.23521   2
 -13  -1   1 106.896 9.31461   1
 -13  -1   1 101.676 9.30860   3
  13  -1  -1 100.364 9.20841   2
  13   1  -1 95.2437 9.27340   1
  13   1  -1 105.100 9.24175   2
 -13   1   1 102.255 9.20084   2
 -11  -1   1 210.966 20.5099   1
  11  -1  -1 230.279 20.4428   2
 -11  -1   1 233.884 20.4801   2
 -11  -1   1 241.063 20.5411   3
  11   1  -1 223.969 20.4701   2
 -11   1   1 224.446 20.4313   2
  11   1  -1 222.418 20.5105   1
  -9  -1   1 26.6105 2.54364   2
  -9  -1   1 26.0442 2.59671   1
  -9   1   1 26.1682 2.48749   2
   9   1  -1 25.5470 2.58865   1
   9   1  -1 27.6862 2.54824   2
  -7  -1   1 132.859 11.8199   1
  -7  -1   1 129.591 11.7845   2
   7   1  -1 114.687 11.7933   1
  -7   1   1 151.536 11.8199   3
   7   1  -1 125.216 11.7784   2
  -7   1   1 127.085 11.7351   2
  -5  -1   1 4.61249 0.60064   2
  -5  -1   1 2.82919 0.64636   1
   5   1  -1 3.09598 0.64940   1
  -3  -1   1 70.4947 6.50406   1
  -3  -1   1 80.6062 6.48010   2
  -3   1   1 65.6918 6.41150   2
   3   1  -1 68.6554 6.49665   1
  -1  -1   1 25.7517 2.76329   1
  -1  -1   1 30.5903 2.72592   2
   1  -1  -1 33.5718 2.68064   2
   1   1  -1 23.9277 2.69433   2
  -1   1   1 29.4759 2.70393   1
  -1   1   1 30.8080 2.66411   2
   1  -1   1 29.6458 2.76608   1
  -1  -1  -1 26.2986 2.69295   3
   1  -1   1 31.6780 2.72509   3
  -1  -1  -1 30.8459 2.71982   1
   1   1   1 26.6150 2.69597   1
   1   1   1 30.3467 2.67227   3
  -3  -1  -1 76.7083 7.20564   1
  -3  -1  -1 80.6285 7.20393   3
  -3  -1  -1 89.1880 7.20391   2
   3   1   1 76.4910 7.20217   1
  -3   1  -1 72.4490 7.21506   3
   3   1   1 81.9509 7.19522   3
  -5  -1  -1 6.71660 0.71844   2
  -5  -1  -1 5.46577 0.74458   1
   5  -1   1 5.03354 0.76010   3
  -5  -1  -1 6.41336 0.74777   3
   5   1   1 4.34537 0.70056   1
   5   1   1 5.50264 0.71720   3
   5   1   1 6.01521 0.71375   2
  -5   1  -1 5.44282 0.77247   3
  -7  -1  -1 144.933 12.7626   1
  -7  -1  -1 150.125 12.7814   3
   7  -1   1 141.755 12.7987   3
  -7  -1  -1 156.451 12.7621   2
  -7   1  -1 123.491 12.7637   3
   7   1   1 125.695 12.7619   3
   7   1   1 147.086 12.7617   1
  -9  -1  -1 27.8228 2.69870   3
  -9  -1  -1 27.8438 2.64462   2
   9  -1   1 25.9754 2.72014   3
  -9  -1  -1 29.5033 2.68075   1
   9   1   1 28.5765 2.67459   1
   9   1   1 25.8010 2.69241   3
 -11  -1  -1 232.031 21.1243   1
  11  -1   1 237.752 21.1821   3
 -11  -1  -1 251.612 21.1720   3
 -11  -1  -1 240.043 21.1093   2
 -11   1  -1 206.325 21.0859   2
  11   1   1 214.380 21.0910   2
  11   1   1 236.018 21.1216   1
  11   1   1 252.361 21.1837   3
 -13  -1  -1 102.838 9.09204   2
  13  -1   1 112.142 9.20590   3
 -13  -1  -1 99.8237 9.10774   1
  13   1   1 88.1722 9.06033   2
 -13   1  -1 89.3634 9.05810   2
  13   1   1 111.398 9.18345   3
  13   1   1 93.1782 9.09727   1
 -15  -1  -1 193.454 17.1997   2
 -15  -1  -1 186.613 17.2241   1
 -15  -1  -1 207.200 17.2780   3
  15  -1   1 164.855 17.2742   3
  15   1   1 177.403 17.2854   3
  15   1   1 193.472 17.1945   2
 -15   1  -1 193.963 17.1794   2
  15   1   1 203.647 17.2378   1
 -17  -1  -1 191.444 16.9723   1
  17  -1   1 168.424 17.0333   3
  17  -1   1 191.115 16.9255   2
 -17  -1  -1 187.874 16.9265   2
 -17  -1  -1 185.146 16.9931   3
  17   1   1 202.092 16.9894   1
  17   1   1 176.246 16.9132   2
  17   1   1 193.319 17.0648   3
 -17   1  -1 186.591 16.9101   2
 -19  -1  -1 2.57043 0.83426   2
  19  -1   1 3.02427 0.84021   2
 -19  -1  -1 2.63827 0.82066   3
  19  -1   1 1.84784 0.97735   3
 -19  -1  -1 4.53135 0.96512   1
 -19   1  -1 3.06337 0.80739   2
  19   1   1 0.41820 0.51614   2
  19   1   1 3.32031 0.97324   1
  19   1   1 1.15858 0.91602   3
 -21  -1  -1 158.817 14.6435   3
 -21  -1  -1 159.271 14.5614   2
  21  -1   1 173.971 14.5674   2
 -21  -1  -1 171.524 14.6414   1
  21   1   1 168.244 14.6370   1
 -21   1  -1 148.599 14.6350   3
  21   1   1 143.710 14.6857   3
 -21   1  -1 152.223 14.5232   2
  21   1   1 164.983 14.5605   2
 -23  -1  -1 25.1375 2.59809   1
  23  -1   1 25.0398 2.78137   3
 -23  -1  -1 21.7849 2.45905   2
 -23   1  -1 22.0596 2.54136   3
  23   1   1 24.5855 2.78451   3
 -23   1  -1 19.2500 2.40545   2
  23   1   1 23.4198 2.61699   1
  23   1   1 21.6251 2.41273   2
 -25  -1  -1 105.810 10.0251   1
  25  -1   1 112.695 9.95181   2
 -25  -1  -1 110.971 9.96037   2
  25  -1   1 100.639 10.1830   3
  25   1   1 115.883 10.1903   3
 -25   1  -1 109.226 9.91329   2
 -25   1  -1 97.4467 10.0566   1
 -27  -1  -1 42.9813 4.12113   2
 -27  -1  -1 38.4458 4.20168   1
  27  -1   1 40.7651 4.40622   3
  27  -1   1 41.4692 4.12271   2
 -27  -1  -1 47.2131 4.30036   3
 -27   1  -1 40.3527 4.10122   2
 -27   1  -1 39.1623 4.30498   1
  27   1   1 41.4228 4.35131   3
  29  -1   1 65.9446 6.45301   3
 -29  -1  -1 60.5496 6.06824   2
 -29  -1  -1 67.1946 6.24156   1
 -29   1  -1 62.6350 6.32725   1
 -29   1  -1 64.1436 6.07774   2
  31  -1   1 59.3796 6.19509   3
 -31  -1  -1 63.4806 6.03737   1
 -31  -1  -1 58.2950 5.83549   2
 -31   1  -1 63.6017 6.12240   1
 -31   1  -1 62.0193 5.84408   2
 -33  -1  -1 6.98139 1.60873   1
 -33  -1  -1 6.59939 1.33043   2
  33  -1   1 5.80158 1.66189   3
 -33   1  -1 5.73229 1.25024   2
 -33   1  -1 7.51314 1.65625   1
 -35  -1  -1 47.6687 4.80705   1
 -35  -1  -1 43.3396 4.50443   2
 -35   1  -1 43.4118 4.74431   1
 -35   1  -1 46.9358 4.49774   2
 -37  -1  -1 4.06476 1.29589   2
 -37  -1  -1 6.79629 1.71120   1
 -37   1  -1 3.60589 1.24239   2
 -37   1  -1 5.48117 1.71445   1
 -39  -1  -1 12.6947 2.31171   1
 -39  -1  -1 15.0890 2.07382   2
 -39   1  -1 15.3568 2.38393   1
 -39   1  -1 13.8109 1.92330   2
 -41  -1  -1 15.4889 2.49303   1
 -41  -1  -1 15.3784 2.13625   2
 -41   1  -1 14.8464 2.08228   2
 -41   1  -1 13.9021 2.47708   1
 -43  -1  -1 7.44015 1.67401   2
 -43  -1  -1 9.60356 2.06730   1
 -43   1  -1 6.31098 1.94947   1
 -43   1  -1 9.17455 1.63078   2
 -45  -1  -1 22.4636 2.98866   1
 -45  -1  -1 17.9813 2.45824   2
 -45   1  -1 16.5068 2.31524   2
 -45   1  -1 15.3408 2.79340   1
 -47  -1  -1 2.85122 1.44446   2
 -47  -1  -1 3.04421 1.84925   1
 -47   1  -1 2.91981 1.76667   1
 -47   1  -1 2.78991 1.33099   2
 -49  -1  -1 16.5058 2.80605   1
 -49  -1  -1 14.0128 2.31945   2
 -49   1  -1 16.7057 2.82108   1
 -49   1  -1 13.6701 2.19065   2
 -51  -1  -1 0.26570 1.94846   1
 -51  -1  -1 1.71798 1.53048   2
 -51   1  -1 1.69528 1.38254   2
 -51   1  -1 0.86673 1.98877   1
 -53  -1  -1 3.04023 1.53596   2
 -53  -1  -1 5.53924 2.10547   1
 -53   1  -1 4.35434 2.07017   1
 -53   1  -1 3.44177 1.47837   2
 -55  -1  -1 3.74853 1.62906   2
 -55  -1  -1 3.49207 2.05080   1
 -55   1  -1 4.42964 2.23926   1
 -55   1  -1 1.71103 1.46506   2
 -57  -1  -1 2.87921 1.62727   2
 -57  -1  -1 1.22295 2.07080   1
 -57   1  -1 1.07634 1.41800   2
 -57   1  -1 -2.1126 1.92960   1
 -59  -1  -1 2.54836 2.22502   1
 -59  -1  -1 1.34686 1.52516   2
 -59   1  -1 3.03904 1.50678   2
 -59   1  -1 0.81684 1.97535   1
 -61  -1  -1 0.56559 2.11388   1
 -61  -1  -1 2.30354 1.65294   2
 -61   1  -1 0.78670 1.49386   2
 -61   1  -1 -1.8030 1.96807   1
 -60  -2   1 -1.0853 1.50379   2
 -60  -2   1 1.45098 2.19233   1
 -60   2   1 -1.2540 2.06158   1
 -60   2   1 -1.0437 1.29732   2
 -58  -2   1 4.37708 2.30097   1
 -58  -2   1 5.02388 1.88874   2
 -58   2   1 0.92901 2.10373   1
 -58   2   1 7.08151 1.59372   2
 -56  -2   1 1.02898 1.98645   1
 -56  -2   1 0.79166 1.57652   2
 -56   2   1 3.54803 2.19930   1
 -56   2   1 1.81075 1.31576   2
 -54  -2   1 5.03102 2.22622   1
 -54  -2   1 8.10595 1.92019   2
 -54   2   1 7.29874 1.66133   2
 -54   2   1 9.35254 2.42689   1
 -52  -2   1 1.84155 1.99902   1
 -52  -2   1 2.43003 1.54647   2
 -52   2   1 2.04540 1.90046   1
 -52   2   1 3.39595 1.35838   2
 -50  -2   1 5.72803 2.22721   1
 -50  -2   1 8.90969 1.88800   2
 -50   2   1 6.17264 1.54757   2
 -50   2   1 7.93243 2.18842   1
 -48  -2   1 8.60555 2.30583   1
 -48  -2   1 13.6143 2.11643   2
 -48   2   1 11.1504 2.34530   1
 -48   2   1 9.60665 1.72514   2
 -46  -2   1 1.49075 1.39000   2
 -46  -2   1 0.67482 1.68155   1
 -46   2   1 1.10570 1.17283   2
 -46   2   1 -0.2679 1.67538   1
 -44  -2   1 8.37005 2.02789   1
 -44  -2   1 9.21219 1.76141   2
 -44   2   1 7.45784 1.44220   2
 -44   2   1 5.18733 1.87962   1
 -42  -2   1 3.16802 1.31701   2
 -42  -2   1 2.20365 1.51776   1
 -42   2   1 2.40943 1.66444   1
 -42   2   1 0.39570 1.07519   2
 -40  -2   1 9.80711 1.90544   1
 -40  -2   1 8.12826 1.64356   2
 -40   2   1 7.87822 1.92387   1
 -40   2   1 7.15204 1.42523   2
 -38  -2   1 2.34589 1.42822   1
 -38  -2   1 3.29742 1.24379   2
 -38   2   1 2.93809 1.02760   2
 -38   2   1 3.01366 1.62208   1
 -36  -2   1 17.7278 2.46174   1
 -36  -2   1 17.9904 2.28425   2
 -36   2   1 18.2580 2.06141   2
 -36   2   1 15.2391 2.49275   1
 -34  -2   1 20.3658 2.63761   2
 -34  -2   1 21.9593 2.79380   1
 -34   2   1 24.3718 2.93922   1
 -34   2   1 24.2219 2.49673   2
 -32  -2   1 6.45621 1.32585   2
 -32  -2   1 6.82883 1.50652   1
 -32   2   1 7.15635 1.62319   1
 -32   2   1 7.60549 1.21234   2
 -30  -2   1 9.57400 1.62059   2
 -30  -2   1 12.5669 1.90498   1
 -30  -2   1 12.2493 1.72262   3
 -30   2   1 12.1880 1.54123   2
 -30   2   1 12.1476 1.92125   1
 -28  -2   1 0.99284 0.82397   3
 -28  -2   1 1.75685 1.06837   1
 -28  -2   1 1.49834 0.87913   2
 -28   2   1 1.83846 0.77554   2
 -26  -2   1 20.2808 2.32920   2
 -26  -2   1 20.8688 2.49826   1
 -26   2   1 21.1162 2.22022   2
 -24  -2   1 8.24624 1.39178   1
 -24  -2   1 7.02095 1.19483   2
 -24  -2   1 4.44050 1.11315   3
 -24   2   1 6.46286 1.00933   2
 -22  -2   1 29.0557 2.87456   1
 -22  -2   1 23.0583 2.73325   3
 -22  -2   1 27.4604 2.72994   2
 -22   2   1 26.8419 2.64537   2
 -20  -2   1 114.513 9.86319   2
 -20  -2   1 97.0623 9.87786   1
 -20  -2   1 103.000 9.89495   3
 -20   2   1 104.580 9.74969   2
  20   2  -1 113.794 9.91237   1
  20   2  -1 110.034 9.83123   2
 -18  -2   1 25.0357 2.38155   1
 -18  -2   1 22.4448 2.34208   3
 -18  -2   1 19.8930 2.25437   2
  18   2  -1 22.8689 2.38979   1
 -18   2   1 18.9990 2.28720   3
 -18   2   1 22.3064 2.17666   2
  18   2  -1 21.2243 2.23239   2
 -16  -2   1 49.1203 4.88550   2
 -16  -2   1 46.6030 4.95687   1
 -16  -2   1 59.9683 4.98678   3
  16   2  -1 55.0972 4.99889   1
 -16   2   1 48.6988 4.80976   2
 -16   2   1 51.8230 4.94353   3
 -14  -2   1 10.4047 1.28434   3
 -14  -2   1 8.18328 1.35435   1
 -14  -2   1 9.89515 1.26003   2
  14   2  -1 9.98605 1.37625   1
 -14   2   1 10.2995 1.28048   3
 -14   2   1 9.33865 1.17694   2
 -12  -2   1 11.0202 1.60554   1
 -12  -2   1 14.3270 1.54406   3
 -12  -2   1 12.2126 1.52391   2
  12   2  -1 11.7993 1.57092   1
 -12   2   1 14.6418 1.54225   3
 -10  -2   1 13.6905 1.52402   2
 -10  -2   1 12.4306 1.57644   1
  10   2  -1 12.0485 1.54655   1
 -10   2   1 13.9229 1.45787   3
  -8  -2   1 34.6598 3.48161   2
  -8  -2   1 33.6511 3.52356   1
   8   2  -1 34.7882 3.52136   1
  -8   2   1 40.2574 3.44066   3
  -6  -2   1 36.7878 3.71435   1
  -6  -2   1 37.8620 3.64419   2
   6   2  -1 40.5491 3.63942   2
  -6   2   1 36.6949 3.57435   3
   6   2  -1 42.0055 3.74612   1
  -4  -2   1 15.4007 1.65844   2
  -4  -2   1 12.2816 1.73633   1
   4   2  -1 15.7299 1.62896   2
  -4   2   1 15.2185 1.55676   2
  -4   2   1 16.3630 1.50626   3
   4   2  -1 12.7591 1.75422   1
  -2  -2   1 215.287 18.2082   1
   2  -2  -1 200.268 18.0787   2
  -2  -2   1 199.524 18.1245   2
   2   2  -1 201.337 18.1795   1
  -2   2   1 189.074 18.0131   3
  -2   2   1 196.423 18.1194   1
   2   2  -1 203.409 18.1048   2
  -2   2   1 201.178 18.0595   2
   0  -2  -1 54.6755 5.21128   1
   0  -2   1 48.0138 5.24555   1
   0  -2   1 52.5064 5.14919   2
   0  -2  -1 56.0372 5.10208   2
   0   2  -1 59.9636 5.13623   2
   0   2  -1 58.9860 5.26607   1
   0   2   1 51.8105 5.16724   1
   0   2   1 59.7249 5.08609   2
   2  -2   1 198.850 16.8265   3
  -2  -2  -1 187.393 16.9102   1
  -2  -2  -1 192.997 16.8607   2
   2  -2   1 165.594 16.9425   1
  -2  -2  -1 199.208 16.8060   3
   2   2   1 167.576 16.8792   1
  -2   2  -1 179.505 16.9308   1
   2   2   1 194.819 16.8421   2
  -2   2  -1 189.858 16.8673   2
  -4  -2  -1 15.9339 1.56637   2
   4  -2   1 13.7384 1.54096   3
  -4  -2  -1 15.3981 1.48837   3
  -4  -2  -1 11.7525 1.67992   1
  -4   2  -1 14.1097 1.56284   3
   4   2   1 15.9514 1.53089   2
  -4   2  -1 15.3456 1.76007   1
   4   2   1 15.3771 1.43342   3
   4   2   1 14.2814 1.66321   1
  -6  -2  -1 38.3175 3.74633   3
  -6  -2  -1 36.1587 3.81679   1
   6  -2   1 44.3223 3.81249   3
  -6  -2  -1 41.8630 3.80416   2
   6   2   1 40.2072 3.76748   2
  -6   2  -1 43.9580 3.80292   3
   6   2   1 35.5151 3.79657   1
   6   2   1 41.8913 3.73271   3
  -8  -2  -1 39.1948 3.21276   2
  -8  -2  -1 30.6962 3.13788   3
  -8  -2  -1 32.1881 3.21684   1
   8  -2   1 31.2994 3.22555   3
  -8   2  -1 32.2137 3.18341   3
   8   2   1 35.7853 3.17186   2
   8   2   1 30.3710 3.13510   3
   8   2   1 39.6784 3.24042   1
 -10  -2  -1 12.0525 1.41366   3
  10  -2   1 10.8984 1.48573   3
 -10  -2  -1 15.3434 1.47886   2
 -10  -2  -1 12.3597 1.55741   1
  10   2   1 14.0999 1.45938   1
  10   2   1 13.7847 1.41061   2
 -10   2  -1 12.7775 1.45399   3
  10   2   1 11.8725 1.39710   3
 -12  -2  -1 13.0102 1.44789   1
 -12  -2  -1 12.7363 1.37864   2
  12  -2   1 9.18927 1.45888   3
 -12  -2  -1 11.3455 1.36782   3
  12   2   1 11.6512 1.37516   3
  12   2   1 12.7901 1.32940   2
 -12   2  -1 10.7881 1.39025   3
  12   2   1 10.9360 1.39566   1
 -14  -2  -1 8.49547 1.17853   3
  14  -2   1 7.11363 1.22666   3
 -14  -2  -1 11.3908 1.22197   2
 -14  -2  -1 8.57231 1.23146   1
  14   2   1 12.0841 1.30637   1
  14   2   1 7.62039 1.15934   3
 -14   2  -1 8.07088 1.19371   3
 -16  -2  -1 54.9288 4.83623   2
 -16  -2  -1 52.2119 4.86787   3
  16  -2   1 49.3651 4.96218   3
 -16  -2  -1 50.4922 4.86788   1
 -16   2  -1 47.4220 4.76992   2
  16   2   1 55.1804 4.86074   1
  16   2   1 52.2709 4.89283   3
 -16   2  -1 47.2169 4.87027   3
  18  -2   1 21.0203 2.55166   3
 -18  -2  -1 25.1649 2.45483   3
 -18  -2  -1 21.9247 2.42579   1
 -18  -2  -1 22.4262 2.40195   2
 -18   2  -1 23.2901 2.36666   2
 -18   2  -1 22.8635 2.43474   3
  18   2   1 23.4689 2.49877   3
  18   2   1 20.4816 2.41153   1
 -20  -2  -1 105.987 10.2010   1
 -20  -2  -1 99.3082 10.1354   2
 -20  -2  -1 119.662 10.2477   3
  20  -2   1 124.858 10.4007   3
  20   2   1 115.037 10.2972   3
  20   2   1 101.912 10.1259   2
 -20   2  -1 102.799 10.1063   2
  20   2   1 115.337 10.2215   1
 -22  -2  -1 25.6060 2.70300   1
 -22  -2  -1 24.7080 2.67443   3
  22  -2   1 25.7714 2.94491   3
 -22  -2  -1 22.8351 2.57588   2
  22   2   1 25.6085 2.72159   1
 -22   2  -1 23.5843 2.54106   2
 -24  -2  -1 6.68804 1.17512   3
  24  -2   1 4.83681 1.42044   3
 -24  -2  -1 6.30837 1.29457   1
 -24  -2  -1 6.11789 1.15626   2
 -24   2  -1 6.07293 1.07485   2
  26  -2   1 17.7271 2.58454   3
 -26  -2  -1 19.5426 2.23706   2
 -26  -2  -1 19.0376 2.37131   1
 -26   2  -1 22.3350 2.23277   2
 -28  -2  -1 2.21896 0.93423   2
 -28  -2  -1 1.40823 1.07901   1
  28  -2   1 0.42421 1.10537   3
 -28  -2  -1 1.88291 0.89146   3
 -28   2  -1 1.59624 0.83912   2
  30  -2   1 8.47473 1.87335   3
 -30  -2  -1 11.1741 1.63523   2
 -30  -2  -1 10.3479 1.64392   3
 -30  -2  -1 12.0748 1.79145   1
 -30   2  -1 14.0694 1.58514   2
 -32  -2  -1 7.57592 1.53012   1
 -32  -2  -1 7.81989 1.34307   2
  32  -2   1 4.76053 1.55752   3
 -32   2  -1 4.88200 1.15332   2
  34  -2   1 19.7849 2.82327   3
 -34  -2  -1 21.9593 2.46520   2
 -34  -2  -1 18.8031 2.53598   1
 -34   2  -1 18.9555 2.24709   2
 -34   2  -1 18.7533 2.69836   1
 -36  -2  -1 16.3800 2.47770   1
 -36  -2  -1 17.5918 2.30435   2
 -36   2  -1 19.5428 2.21178   2
 -36   2  -1 18.4024 2.68612   1
 -38  -2  -1 3.23841 1.28458   2
 -38  -2  -1 2.94442 1.53657   1
 -38   2  -1 5.22785 1.72414   1
 -38   2  -1 5.20324 1.23751   2
 -40  -2  -1 9.75981 1.92327   1
 -40  -2  -1 7.95730 1.63201   2
 -40   2  -1 7.45848 1.45457   2
 -40   2  -1 6.68950 1.96311   1
 -42  -2  -1 1.03140 1.24865   2
 -42  -2  -1 0.93852 1.55376   1
 -42   2  -1 -0.6882 1.65200   1
 -42   2  -1 2.50957 1.17233   2
 -44  -2  -1 8.00204 2.01890   1
 -44  -2  -1 9.69618 1.77068   2
 -44   2  -1 7.47103 1.56172   2
 -44   2  -1 6.81270 2.02180   1
 -46  -2  -1 0.24705 1.72392   1
 -46  -2  -1 1.03912 1.31086   2
 -46   2  -1 0.57173 1.72409   1
 -46   2  -1 2.06488 1.24609   2
 -48  -2  -1 9.50876 2.30757   1
 -48  -2  -1 8.81326 1.92369   2
 -48   2  -1 9.57517 1.75090   2
 -48   2  -1 8.31893 2.27524   1
 -50  -2  -1 8.19211 2.26922   1
 -50  -2  -1 7.36783 1.90817   2
 -50   2  -1 8.00505 1.69110   2
 -50   2  -1 6.76003 2.20543   1
 -52  -2  -1 5.26550 2.08740   1
 -52  -2  -1 0.29683 1.49798   2
 -52   2  -1 3.41581 1.37470   2
 -52   2  -1 4.94896 2.09212   1
 -54  -2  -1 8.50371 2.42090   1
 -54  -2  -1 7.81557 2.01767   2
 -54   2  -1 7.75348 1.70522   2
 -54   2  -1 8.08069 2.34342   1
 -56  -2  -1 -0.0515 1.52785   2
 -56  -2  -1 -1.4193 1.94765   1
 -56   2  -1 2.08308 1.37448   2
 -56   2  -1 3.87016 2.18752   1
 -58  -2  -1 4.00464 2.26479   1
 -58  -2  -1 4.02369 1.84324   2
 -58   2  -1 5.00710 1.56412   2
 -58   2  -1 7.27728 2.40546   1
 -60  -2  -1 2.08614 2.37626   1
 -60  -2  -1 -0.2351 1.52211   2
 -60   2  -1 -2.9447 1.94048   1
 -60   2  -1 -0.3657 1.36870   2
 -59  -3   1 3.03771 2.27311   1
 -59  -3   1 -0.0504 1.66890   2
 -59   3   1 1.02432 1.27802   2
 -59   3   1 -1.5370 2.03971   1
 -57  -3   1 3.26187 2.23222   1
 -57  -3   1 2.26355 1.74669   2
 -57   3   1 4.39234 1.42967   2
 -57   3   1 4.72428 2.08983   1
 -55  -3   1 -0.8536 1.50573   2
 -55  -3   1 -1.1867 1.99173   1
 -55   3   1 0.87078 1.22527   2
 -55   3   1 -0.5968 1.92254   1
 -53  -3   1 10.9617 2.58693   1
 -53  -3   1 9.92614 2.22070   2
 -53   3   1 12.6595 1.89081   2
 -53   3   1 10.9845 2.54145   1
 -51  -3   1 0.44827 1.54784   2
 -51  -3   1 0.43970 1.85133   1
 -51   3   1 -0.6066 1.73281   1
 -51   3   1 1.34581 1.20490   2
 -49  -3   1 19.0880 3.16742   1
 -49  -3   1 20.6664 2.88817   2
 -49   3   1 20.5979 3.14232   1
 -49   3   1 19.5945 2.48458   2
 -47  -3   1 4.62899 1.70771   2
 -47  -3   1 1.96061 1.78872   1
 -47   3   1 5.52526 1.94156   1
 -47   3   1 2.58734 1.21572   2
 -45  -3   1 19.7523 3.03020   1
 -45  -3   1 19.1902 2.79396   2
 -45   3   1 22.2183 2.52498   2
 -45   3   1 20.7200 3.06543   1
 -43  -3   1 10.1686 2.24507   1
 -43  -3   1 11.1372 2.08346   2
 -43   3   1 11.0230 1.70463   2
 -43   3   1 12.3270 2.38658   1
 -41  -3   1 4.33211 1.51888   2
 -41  -3   1 4.40748 1.73026   1
 -41   3   1 4.02282 1.16738   2
 -41   3   1 3.76566 1.81905   1
 -39  -3   1 6.70715 1.80138   1
 -39  -3   1 6.44536 1.56531   2
 -39   3   1 5.97798 1.91521   1
 -39   3   1 7.52322 1.31783   2
 -37  -3   1 1.30073 1.41335   1
 -37  -3   1 1.09989 1.25049   2
 -37   3   1 3.49068 1.03325   2
 -37   3   1 5.50459 1.64236   1
 -35  -3   1 61.4840 6.05223   2
 -35  -3   1 58.3358 6.19504   1
 -35   3   1 64.1097 5.89034   2
 -33  -3   1 7.98637 1.55429   2
 -33  -3   1 6.82214 1.55481   3
 -33  -3   1 7.20129 1.66334   1
 -33   3   1 8.20035 1.24176   2
 -31  -3   1 59.4469 5.70433   1
 -31  -3   1 57.9190 5.66153   3
 -31  -3   1 54.0661 5.56256   2
 -31   3   1 56.7238 5.40009   2
 -29  -3   1 41.4665 4.24364   1
 -29  -3   1 37.1951 4.10686   2
 -29   3   1 42.9356 3.97439   2
 -27  -3   1 29.0167 2.95467   2
 -27  -3   1 24.4140 2.94122   3
 -27  -3   1 28.9880 3.02551   1
 -27   3   1 27.2121 2.72836   2
 -25  -3   1 53.4260 5.40583   2
 -25  -3   1 55.0723 5.50563   1
 -25  -3   1 61.0704 5.49626   3
 -25   3   1 54.3609 5.26154   2
 -23  -3   1 3.07883 0.99054   3
 -23  -3   1 5.94008 1.12585   2
 -23  -3   1 6.93001 1.29940   1
 -23   3   1 6.51643 0.94551   2
 -21  -3   1 76.7628 7.91975   1
 -21  -3   1 86.2455 7.90172   2
 -21  -3   1 96.0433 7.92972   3
 -21   3   1 76.8430 7.72996   2
 -19  -3   1 4.92422 1.03400   2
 -19  -3   1 3.64346 0.90797   3
 -19  -3   1 4.82707 1.20841   1
 -19   3   1 3.74082 0.84037   2
  19   3  -1 6.73308 1.52988   1
 -17  -3   1 26.0947 2.51529   3
 -17  -3   1 22.3447 2.57703   1
 -17  -3   1 20.0151 2.51679   2
  17   3  -1 23.2554 2.57326   1
 -17   3   1 24.0350 2.51643   3
 -15  -3   1 40.5264 3.45785   3
 -15  -3   1 34.3805 3.56694   1
 -15  -3   1 29.7449 3.40568   2
  15   3  -1 35.1349 3.54605   1
 -15   3   1 32.6972 3.40288   3
 -13  -3   1 21.3223 2.54352   2
 -13  -3   1 22.1229 2.64494   1
 -13  -3   1 27.7028 2.53076   3
  13   3  -1 23.1756 2.51959   2
  13   3  -1 27.8950 2.68563   1
 -13   3   1 24.8737 2.50692   3
 -11  -3   1 177.539 17.0529   1
 -11  -3   1 185.322 17.0100   2
 -11  -3   1 172.901 16.9276   3
  11   3  -1 218.845 17.1058   1
  11   3  -1 186.964 16.9748   2
 -11   3   1 186.324 16.9623   3
  -9  -3   1 34.6559 3.41579   1
  -9  -3   1 32.4170 3.25448   2
   9   3  -1 38.5674 3.40885   1
   9   3  -1 36.1763 3.26050   2
  -9   3   1 28.8207 3.13743   2
  -9   3   1 32.2239 3.16514   3
  -7  -3   1 240.541 22.2866   2
  -7  -3   1 225.626 22.3288   1
  -7   3   1 248.279 22.1916   3
  -7   3   1 234.146 22.1882   2
   7   3  -1 254.784 22.2641   2
   7   3  -1 276.628 22.3732   1
  -5  -3   1 24.2781 2.46975   2
  -5  -3   1 18.5297 2.58048   1
  -5   3   1 23.0628 2.42043   1
   5   3  -1 25.2013 2.38864   2
   5   3  -1 25.0879 2.56456   1
  -5   3   1 24.4656 2.18556   3
  -5   3   1 18.9897 2.25166   2
  -3  -3   1 199.929 19.6841   2
   3  -3  -1 228.197 19.6655   2
  -3  -3   1 220.178 19.7899   1
  -3   3   1 212.405 19.6141   2
   3   3  -1 242.743 19.7921   1
   3   3  -1 210.408 19.6577   2
  -3   3   1 227.009 19.7222   1
  -3   3   1 204.661 19.5268   3
   1  -3  -1 3.61587 0.88748   2
  -1  -3   1 4.27897 0.96321   2
   1  -3  -1 2.28205 1.06341   1
  -1  -3   1 2.27503 1.20676   1
  -1   3   1 5.07650 0.74741   2
  -1   3   1 2.92746 0.96631   1
   1   3  -1 5.93376 0.83134   2
   1   3  -1 2.51998 1.01486   1
  -1  -3  -1 4.93773 0.92731   2
  -1  -3  -1 5.49661 1.16656   1
   1  -3   1 4.39013 0.61217   3
   1  -3   1 4.60728 1.03202   2
   1  -3   1 3.56822 1.29317   1
  -1   3  -1 3.04029 1.11605   1
  -1   3  -1 4.63417 0.83104   2
   1   3   1 6.35344 1.05098   1
   1   3   1 4.27242 0.75820   2
  -3  -3  -1 204.057 19.2207   1
  -3  -3  -1 228.650 19.1750   2
   3  -3   1 194.226 19.0692   3
  -3  -3  -1 201.154 19.0481   3
  -3   3  -1 217.971 19.1519   2
   3   3   1 206.993 19.1223   2
   3   3   1 213.008 19.2083   1
  -3   3  -1 235.750 19.2892   1
  -5  -3  -1 18.5433 2.25708   1
  -5  -3  -1 20.3885 1.94270   3
  -5  -3  -1 20.8851 2.11009   2
   5  -3   1 19.6386 2.00523   3
  -5   3  -1 19.5948 2.02077   3
  -5   3  -1 19.9833 2.25218   1
   5   3   1 19.5448 2.17102   1
   5   3   1 23.2042 2.05494   2
  -5   3  -1 19.5655 2.08774   2
  -7  -3  -1 202.418 20.7304   3
  -7  -3  -1 235.297 20.8170   2
  -7  -3  -1 233.681 20.8669   1
   7  -3   1 231.042 20.7859   3
  -7   3  -1 238.346 20.8897   1
  -7   3  -1 229.600 20.7742   3
   7   3   1 241.467 20.7939   2
   7   3   1 234.037 20.8451   1
  -9  -3  -1 29.5510 3.47186   1
  -9  -3  -1 37.2461 3.36513   3
   9  -3   1 39.1929 3.44675   3
  -9  -3  -1 33.7326 3.44304   2
   9   3   1 34.9751 3.48892   1
   9   3   1 32.9760 3.39742   2
  -9   3  -1 37.4098 3.42119   3
 -11  -3  -1 184.565 18.7492   1
  11  -3   1 208.140 18.7609   3
 -11  -3  -1 207.166 18.7429   2
 -11  -3  -1 222.209 18.7226   3
  11   3   1 208.456 18.7609   1
 -11   3  -1 207.961 18.7275   3
 -13  -3  -1 24.4196 2.47174   1
  13  -3   1 19.0023 2.34893   3
 -13  -3  -1 22.8056 2.33321   2
 -13  -3  -1 22.5701 2.30476   3
 -13   3  -1 20.8526 2.32876   3
  13   3   1 26.5875 2.43382   1
  13   3   1 23.7637 2.34195   2
  15  -3   1 24.5406 3.10856   3
 -15  -3  -1 29.7450 3.03606   2
 -15  -3  -1 33.4493 3.16852   1
 -15  -3  -1 33.0357 3.06427   3
  15   3   1 31.9458 3.02233   2
 -15   3  -1 28.3125 3.05344   3
  15   3   1 33.7061 3.12407   1
 -17  -3  -1 22.4690 2.36027   1
  17  -3   1 17.9743 2.40229   3
 -17  -3  -1 21.9507 2.31059   3
 -17  -3  -1 24.6481 2.38197   2
 -17   3  -1 19.0994 2.27441   3
  17   3   1 22.2713 2.34572   1
  19  -3   1 4.36239 1.20442   3
 -19  -3  -1 4.58498 0.98425   3
 -19  -3  -1 3.68001 1.15473   1
 -19  -3  -1 5.85504 1.09797   2
  19   3   1 6.88326 1.22270   1
 -21  -3  -1 74.7850 7.32254   3
 -21  -3  -1 77.2608 7.31047   2
  21  -3   1 72.6288 7.49747   3
 -21  -3  -1 80.5635 7.35162   1
 -21   3  -1 84.1727 7.25524   2
 -23  -3  -1 4.60228 1.09051   2
 -23  -3  -1 5.49965 1.26584   1
  23  -3   1 5.03354 1.38340   3
 -23  -3  -1 4.75956 1.06918   3
 -23   3  -1 5.56643 1.06497   2
 -25  -3  -1 55.2761 5.63237   2
 -25  -3  -1 60.5220 5.75042   1
 -25  -3  -1 63.2559 5.73624   3
  25  -3   1 52.0763 5.86170   3
 -25   3  -1 61.4789 5.57513   2
 -27  -3  -1 23.6332 2.94130   2
 -27  -3  -1 28.4179 3.06725   1
  27  -3   1 27.1469 3.29891   3
 -27  -3  -1 32.5076 3.10412   3
 -27   3  -1 25.8677 2.83104   2
  29  -3   1 44.1600 4.55287   3
 -29  -3  -1 43.9086 4.24515   1
 -29  -3  -1 36.6253 4.13244   2
 -29   3  -1 39.4410 4.00576   2
  31  -3   1 47.3774 5.85111   3
 -31  -3  -1 61.4954 5.61275   2
 -31  -3  -1 63.3337 5.74351   1
 -31  -3  -1 51.2515 5.63350   3
 -31   3  -1 63.7843 5.47835   2
 -33  -3  -1 5.88717 1.42969   3
 -33  -3  -1 7.62002 1.65537   1
 -33  -3  -1 8.13785 1.49260   2
 -33   3  -1 8.12480 1.30083   2
 -35  -3  -1 52.5186 5.67192   2
 -35  -3  -1 58.3020 5.83141   1
 -35   3  -1 61.6180 5.57370   2
 -37  -3  -1 2.80397 1.30865   2
 -37  -3  -1 3.41349 1.56071   1
 -37   3  -1 3.08636 1.07863   2
 -39  -3  -1 8.02945 1.82379   1
 -39  -3  -1 7.93437 1.65126   2
 -39   3  -1 4.74640 1.28620   2
 -41  -3  -1 4.12636 1.66658   1
 -41  -3  -1 3.72697 1.52355   2
 -41   3  -1 5.11421 1.83997   1
 -41   3  -1 5.42962 1.33102   2
 -43  -3  -1 13.5380 2.31176   1
 -43  -3  -1 9.77999 2.01195   2
 -43   3  -1 11.6075 1.80738   2
 -43   3  -1 11.4480 2.42808   1
 -45  -3  -1 21.3683 2.82224   2
 -45  -3  -1 18.6637 2.96715   1
 -45   3  -1 19.3095 2.50319   2
 -45   3  -1 22.8251 3.20113   1
 -47  -3  -1 2.70939 1.84000   1
 -47  -3  -1 3.32680 1.64792   2
 -47   3  -1 3.92645 2.04305   1
 -47   3  -1 3.28311 1.29954   2
 -49  -3  -1 20.9019 3.27215   1
 -49  -3  -1 20.2106 2.98189   2
 -49   3  -1 22.5064 3.30698   1
 -49   3  -1 20.4980 2.61684   2
 -51  -3  -1 1.48571 1.86842   1
 -51  -3  -1 2.06268 1.67385   2
 -51   3  -1 1.11571 1.80397   1
 -51   3  -1 0.59466 1.21136   2
 -53  -3  -1 10.8708 2.33422   2
 -53  -3  -1 15.1620 2.82036   1
 -53   3  -1 12.4606 1.97695   2
 -53   3  -1 10.2955 2.54061   1
 -55  -3  -1 1.86610 2.11637   1
 -55  -3  -1 1.40877 1.64903   2
 -55   3  -1 0.91295 1.29230   2
 -55   3  -1 -0.0344 1.96584   1
 -57  -3  -1 4.05621 1.88879   2
 -57  -3  -1 1.25020 2.19604   1
 -57   3  -1 3.25855 1.42577   2
 -57   3  -1 3.26276 2.11533   1
 -59  -3  -1 2.11986 1.76647   2
 -59  -3  -1 3.49251 2.40949   1
 -59   3  -1 0.32417 1.98015   1
 -59   3  -1 1.98108 1.40541   2
 -58  -4   1 7.16167 2.20224   2
 -58  -4   1 11.2973 2.92314   1
 -58   4   1 9.20505 2.47725   1
 -56  -4   1 -1.4952 1.68088   2
 -56  -4   1 -0.4531 1.96374   1
 -56   4   1 -0.6670 1.88034   1
 -54  -4   1 12.3841 2.79112   1
 -54  -4   1 13.1263 2.53483   2
 -54   4   1 13.5448 2.82236   1
 -54   4   1 12.5360 1.97059   2
 -52  -4   1 1.25734 1.95950   1
 -52  -4   1 3.30477 1.78008   2
 -52   4   1 3.25226 2.06585   1
 -52   4   1 2.97379 1.26262   2
 -50  -4   1 13.5660 2.46741   2
 -50  -4   1 10.1761 2.52916   1
 -50   4   1 13.5954 1.89013   2
 -50   4   1 10.9990 2.48018   1
 -48  -4   1 30.6864 4.27208   1
 -48  -4   1 37.7833 4.04163   2
 -48   4   1 32.6546 4.17188   1
 -48   4   1 34.3056 3.64195   2
 -46  -4   1 5.21993 1.86924   2
 -46  -4   1 7.03123 2.04652   1
 -46   4   1 6.90252 2.17892   1
 -46   4   1 5.33807 1.32396   2
 -44  -4   1 39.7428 4.70799   1
 -44  -4   1 44.4231 4.56006   2
 -44   4   1 39.1251 4.07276   2
 -44   4   1 39.0183 4.61901   1
 -42  -4   1 0.22635 1.60568   1
 -42  -4   1 1.62119 1.43593   2
 -42   4   1 0.72673 1.02543   2
 -42   4   1 -0.6580 1.60870   1
 -40  -4   1 31.6500 3.54338   1
 -40  -4   1 26.2577 3.32619   2
 -40   4   1 27.2125 2.99489   2
 -38  -4   1 7.16669 1.81888   1
 -38  -4   1 5.58690 1.66689   2
 -38   4   1 6.60365 1.25971   2
 -36  -4   1 23.9603 2.95280   2
 -36  -4   1 18.8681 3.75797   3
 -36  -4   1 26.0066 3.22839   1
 -36   4   1 26.4696 2.67051   2
 -34  -4   1 71.6665 7.00541   2
 -34  -4   1 79.7769 7.16621   1
 -34  -4   1 61.6692 6.99795   3
 -34   4   1 76.5529 6.75089   2
 -32  -4   1 33.5610 3.60150   1
 -32  -4   1 32.8999 3.48277   2
 -32   4   1 28.9717 3.15297   2
 -30  -4   1 128.111 11.5679   2
 -30  -4   1 110.498 11.5458   3
 -30  -4   1 127.423 11.6660   1
 -30   4   1 130.800 11.3470   2
 -28  -4   1 6.48941 1.35314   2
 -28  -4   1 6.96862 1.53159   1
 -28  -4   1 4.14492 1.18808   3
 -28   4   1 6.56437 1.06266   2
 -26  -4   1 144.862 13.5960   2
 -26  -4   1 140.589 13.6304   1
 -26  -4   1 161.927 13.6340   3
 -26   4   1 139.140 13.3831   2
 -24  -4   1 47.5162 4.51852   1
 -24  -4   1 44.0079 4.35900   2
 -24  -4   1 39.8586 4.32185   3
 -24   4   1 44.2322 4.17426   2
 -22  -4   1 120.577 11.0905   3
 -22  -4   1 121.391 11.1914   1
 -22  -4   1 115.217 11.0943   2
 -22   4   1 121.058 10.9435   2
 -20  -4   1 168.426 15.0515   2
 -20  -4   1 184.269 15.1511   1
 -20  -4   1 145.020 14.9571   3
 -18  -4   1 38.6070 3.91724   3
 -18  -4   1 43.6360 4.16177   1
 -18  -4   1 39.5004 4.01923   2
 -16  -4   1 188.493 18.6386   2
 -16  -4   1 202.659 18.7103   1
 -16  -4   1 219.984 18.5968   3
 -14  -4   1 3.74861 1.24866   1
 -14  -4   1 2.50341 0.69710   3
 -14  -4   1 5.44651 1.11389   2
 -14   4   1 3.17314 0.83839   3
  14   4  -1 1.93679 1.33105   1
 -12  -4   1 278.751 24.8636   3
 -12  -4   1 254.356 24.9470   2
 -12  -4   1 249.738 25.0071   1
 -12   4   1 272.924 24.8803   3
  12   4  -1 322.359 25.0897   1
 -12   4   1 276.852 24.8387   2
 -10  -4   1 99.4306 10.0004   1
 -10  -4   1 106.946 9.76752   3
 -10  -4   1 106.165 9.93177   2
 -10   4   1 112.763 9.93723   1
  10   4  -1 100.390 9.89804   2
  10   4  -1 122.591 10.0480   1
 -10   4   1 107.163 9.79301   3
 -10   4   1 104.057 9.78361   2
  -8  -4   1 290.281 27.2329   3
  -8  -4   1 275.661 27.4544   1
  -8  -4   1 292.685 27.4016   2
  -8   4   1 300.655 27.2864   2
   8   4  -1 314.138 27.3686   2
  -8   4   1 302.513 27.2540   3
   8   4  -1 328.497 27.4972   1
  -8   4   1 320.494 27.4340   1
  -6  -4   1 369.044 34.4348   2
  -6  -4   1 374.812 34.5403   1
  -6   4   1 357.150 34.2519   3
  -6   4   1 384.826 34.4630   1
   6   4  -1 389.246 34.4006   2
  -6   4   1 379.631 34.3308   2
   6   4  -1 420.067 34.5431   1
  -4  -4   1 82.7778 8.54660   2
  -4  -4   1 83.6737 8.72776   1
  -4   4   1 98.5362 8.47666   2
   4   4  -1 94.0835 8.51353   2
   4   4  -1 94.5797 8.69511   1
  -4   4   1 98.3140 8.64419   1
  -2  -4   1 791.142 67.4474   1
   2  -4  -1 657.934 67.2444   2
  -2  -4   1 712.953 67.3002   2
   2   4  -1 788.706 67.2667   2
  -2   4   1 734.558 67.2120   2
   2   4  -1 790.065 67.4013   1
  -2   4   1 768.023 67.3346   1
   0  -4   1 23.0519 2.64840   2
   0  -4  -1 22.4151 2.49798   2
   0   4   1 22.0189 2.69640   1
   0   4  -1 25.4039 2.42256   2
   0   4   1 24.9209 2.39342   2
   0   4  -1 20.5815 2.79041   1
  -2  -4  -1 799.479 69.2170   1
  -2  -4  -1 735.950 69.0920   2
   2  -4   1 795.712 69.2514   1
   2  -4   1 783.657 68.9475   3
   2   4   1 807.652 69.1770   1
  -2   4  -1 817.211 69.2154   1
   2   4   1 695.539 69.0318   2
  -2   4  -1 720.806 69.0595   2
   4  -4   1 105.191 8.69884   3
  -4  -4  -1 79.1026 8.96860   1
  -4  -4  -1 96.9014 8.85983   2
   4   4   1 88.8159 8.76126   2
  -4   4  -1 97.4035 8.79801   2
  -4   4  -1 99.7758 8.98833   1
   4   4   1 96.6934 8.95067   1
  -6  -4  -1 355.355 35.0884   2
   6  -4   1 446.690 35.0309   3
  -6  -4  -1 389.138 35.1930   1
  -6  -4  -1 354.984 34.9546   3
   6   4   1 407.016 35.1718   1
  -6   4  -1 373.652 35.0537   2
   6   4   1 391.055 35.0604   2
  -6   4  -1 396.025 35.2017   1
  -8  -4  -1 292.752 26.7101   3
   8  -4   1 265.946 26.7464   3
  -8  -4  -1 276.779 26.8828   1
  -8  -4  -1 320.270 26.8560   2
  -8   4  -1 286.144 26.7739   2
   8   4   1 304.416 26.7920   2
  -8   4  -1 303.585 26.9233   1
   8   4   1 321.040 26.9013   1
  -8   4  -1 304.074 26.7580   3
 -10  -4  -1 107.978 9.53987   1
  10  -4   1 86.1589 9.36814   3
 -10  -4  -1 106.794 9.45555   2
 -10  -4  -1 95.1232 9.31298   3
 -10   4  -1 99.1692 9.36189   2
  10   4   1 109.526 9.49353   1
 -10   4  -1 118.366 9.58344   1
  10   4   1 106.847 9.39323   2
 -10   4  -1 100.142 9.37168   3
 -12  -4  -1 270.902 22.4151   1
 -12  -4  -1 248.463 22.2541   3
  12  -4   1 230.909 22.3168   3
 -12  -4  -1 236.799 22.3194   2
 -12   4  -1 246.046 22.2958   3
 -14  -4  -1 4.68941 1.09107   2
 -14  -4  -1 0.57336 1.10076   1
  14  -4   1 3.08249 0.97130   3
 -14  -4  -1 2.86746 0.74589   3
 -14   4  -1 2.84119 0.92714   3
  14   4   1 4.53857 1.10833   1
 -16  -4  -1 206.294 19.1475   3
  16  -4   1 190.903 19.2400   3
 -16  -4  -1 194.909 19.1788   2
 -16  -4  -1 232.099 19.2760   1
  16   4   1 234.824 19.2524   1
 -18  -4  -1 39.4434 4.30071   2
 -18  -4  -1 42.4749 4.39371   1
  18  -4   1 50.3626 4.52643   3
 -18  -4  -1 43.2093 4.27396   3
 -20  -4  -1 180.400 17.5457   1
 -20  -4  -1 169.138 17.4980   2
  20  -4   1 211.004 17.7246   3
 -20  -4  -1 204.660 17.5399   3
 -22  -4  -1 117.276 11.8674   2
  22  -4   1 138.843 12.1098   3
 -22  -4  -1 133.849 11.9170   3
 -22  -4  -1 123.040 11.9123   1
  24  -4   1 39.2858 4.36223   3
 -24  -4  -1 44.4795 4.26792   1
 -24  -4  -1 38.6126 4.16504   3
 -24  -4  -1 44.5101 4.20281   2
 -26  -4  -1 140.945 12.8897   1
 -26  -4  -1 138.366 12.8325   2
 -26  -4  -1 134.325 12.8490   3
  26  -4   1 131.164 13.0407   3
 -26   4  -1 148.499 12.7272   2
 -28  -4  -1 4.52939 1.18239   3
 -28  -4  -1 5.16704 1.41239   1
  28  -4   1 3.01899 1.52236   3
 -28  -4  -1 4.60926 1.27147   2
 -28   4  -1 5.94267 1.17495   2
 -30  -4  -1 106.276 11.8935   3
 -30  -4  -1 135.292 11.9871   2
 -30  -4  -1 138.492 12.0429   1
 -30   4  -1 137.679 11.8000   2
 -32  -4  -1 31.3018 3.50460   2
 -32  -4  -1 32.0054 3.62326   1
 -32   4  -1 31.1384 3.27697   2
 -34  -4  -1 83.1833 7.62348   1
 -34  -4  -1 73.8149 7.46387   2
 -34  -4  -1 75.8608 7.55010   3
 -34   4  -1 76.9100 7.27963   2
 -36  -4  -1 23.0688 3.04789   2
 -36  -4  -1 25.8726 3.23132   1
 -36   4  -1 25.5525 2.75193   2
 -38  -4  -1 9.47693 1.79940   2
 -38  -4  -1 7.33199 1.82110   1
 -38   4  -1 4.27279 1.29408   2
 -40  -4  -1 27.0439 3.33946   1
 -40  -4  -1 26.8080 3.20905   2
 -40   4  -1 26.0013 2.87394   2
 -42  -4  -1 1.92240 1.45405   2
 -42  -4  -1 3.03955 1.74935   1
 -42   4  -1 0.38831 1.13039   2
 -44  -4  -1 43.5801 4.77329   2
 -44  -4  -1 44.3974 4.91046   1
 -44   4  -1 44.4014 4.49743   2
 -46  -4  -1 6.57738 1.82737   2
 -46  -4  -1 5.09388 2.09126   1
 -46   4  -1 5.86127 2.15944   1
 -46   4  -1 4.11506 1.35166   2
 -48  -4  -1 33.0355 4.16606   1
 -48  -4  -1 30.7882 3.77778   2
 -48   4  -1 30.4995 4.14927   1
 -48   4  -1 32.2960 3.48963   2
 -50  -4  -1 12.5902 2.64048   1
 -50  -4  -1 10.5027 2.30189   2
 -50   4  -1 9.95520 1.81872   2
 -50   4  -1 13.5339 2.59709   1
 -52  -4  -1 2.07140 2.07573   1
 -52  -4  -1 4.43819 1.82663   2
 -52   4  -1 4.41276 1.39663   2
 -52   4  -1 4.48628 2.16242   1
 -54  -4  -1 12.9469 2.95254   1
 -54  -4  -1 12.7413 2.52519   2
 -54   4  -1 16.8177 2.16855   2
 -54   4  -1 10.0459 2.69373   1
 -56  -4  -1 -0.5908 1.67360   2
 -56  -4  -1 -1.5220 1.88819   1
 -56   4  -1 2.83571 2.11029   1
 -56   4  -1 0.41147 1.23176   2
 -58  -4  -1 10.4383 2.81966   1
 -58  -4  -1 10.4664 2.41299   2
 -58   4  -1 7.46521 2.52670   1
 -55  -5   1 4.95367 2.36704   1
 -55  -5   1 6.08268 2.06401   2
 -55   5   1 2.59508 2.10796   1
 -53  -5   1 18.9776 3.11793   2
 -53  -5   1 24.8733 3.56751   1
 -53   5   1 17.3216 3.21429   1
 -51  -5   1 0.26134 1.88244   1
 -51  -5   1 0.92125 1.78425   2
 -51   5   1 -1.8138 1.89974   1
 -49  -5   1 33.0037 3.84789   2
 -49  -5   1 33.9872 4.18019   1
 -49   5   1 30.1176 4.11762   1
 -49   5   1 26.2904 4.04527   2
 -47  -5   1 7.93080 2.04893   2
 -47  -5   1 5.69809 2.11811   1
 -47   5   1 8.00532 1.43096   2
 -47   5   1 5.34480 2.09627   1
 -45  -5   1 39.8294 4.50597   2
 -45  -5   1 40.1910 4.75230   1
 -45   5   1 37.6570 4.63471   1
 -45   5   1 41.5243 4.08486   2
 -43  -5   1 28.8373 3.76427   1
 -43  -5   1 27.6077 3.55422   2
 -43   5   1 27.5399 3.01849   2
 -41  -5   1 23.6109 3.09479   2
 -41  -5   1 22.8862 3.22229   1
 -41   5   1 21.1005 2.51321   2
 -39  -5   1 25.1148 3.27368   2
 -39  -5   1 26.5575 3.48243   1
 -39   5   1 27.1623 2.86113   2
 -37  -5   1 4.25354 1.74448   1
 -37  -5   1 1.95158 1.44636   2
 -37   5   1 1.11074 0.98191   2
 -35  -5   1 82.2805 7.81390   1
 -35  -5   1 82.1677 7.74009   2
 -35   5   1 73.8245 7.33556   2
 -33  -5   1 10.8752 1.84797   2
 -33  -5   1 9.79467 2.02596   1
 -33   5   1 8.33639 1.38885   2
 -31  -5   1 98.5272 9.74426   2
 -31  -5   1 102.345 9.76264   3
 -31  -5   1 109.697 9.84453   1
 -31   5   1 100.085 9.45965   2
 -29  -5   1 121.110 10.9505   2
 -29  -5   1 122.265 10.9945   1
 -29  -5   1 105.100 10.8461   3
 -29   5   1 117.759 10.6487   2
 -27  -5   1 73.6744 7.60259   3
 -27  -5   1 79.4994 7.73388   1
 -27  -5   1 80.1924 7.69326   2
 -27   5   1 84.9372 7.42696   2
 -25  -5   1 190.028 17.1265   2
 -25  -5   1 179.286 17.0673   3
 -25  -5   1 189.614 17.1980   1
 -23  -5   1 9.69822 1.86035   1
 -23  -5   1 10.6975 1.69003   2
 -23  -5   1 9.71023 1.46789   3
 -21  -5   1 192.457 18.1459   2
 -21  -5   1 206.774 18.0909   3
 -21  -5   1 192.084 18.2026   1
 -19  -5   1 13.6530 2.12494   1
 -19  -5   1 13.8849 1.94833   2
 -19  -5   1 14.0832 1.74000   3
 -17  -5   1 129.873 12.2377   1
 -17  -5   1 128.291 12.0322   3
 -17  -5   1 131.839 12.1741   2
 -17   5   1 134.812 11.9785   2
 -15  -5   1 80.2909 7.84518   3
 -15  -5   1 82.8260 8.03530   2
 -15  -5   1 89.9740 8.15082   1
 -15   5   1 88.4424 7.84167   2
 -13  -5   1 50.9341 5.27198   1
 -13  -5   1 49.7777 4.94573   3
 -13  -5   1 51.6755 5.15236   2
 -13   5   1 54.6459 5.01424   3
 -13   5   1 56.5462 4.99727   2
 -11  -5   1 327.954 29.8839   1
 -11  -5   1 299.894 29.5882   3
 -11  -5   1 355.160 29.8313   2
 -11   5   1 348.920 29.6527   2
 -11   5   1 317.247 29.6218   3
  -9  -5   1 35.5503 3.51726   3
  -9  -5   1 39.7970 3.86774   2
  -9  -5   1 35.5799 4.05067   1
  -9   5   1 39.2785 3.64972   2
  -9   5   1 38.3811 3.55565   3
  -7  -5   1 385.303 35.2132   3
  -7  -5   1 371.438 35.4583   2
  -7  -5   1 393.930 35.5769   1
  -7   5   1 398.282 35.3305   2
  -7   5   1 415.344 35.7705   1
  -5  -5   1 36.0711 4.82331   1
  -5  -5   1 43.8858 4.54536   2
  -5   5   1 53.4627 4.40464   2
  -5   5   1 43.7265 4.59593   1
  -3  -5   1 363.336 34.7457   2
  -3  -5   1 416.383 34.9334   1
   3  -5  -1 399.704 34.7339   2
  -3   5   1 363.555 34.6189   2
  -3   5   1 382.094 34.7805   1
  -1  -5   1 84.4640 6.98149   2
   1  -5  -1 68.4213 7.01453   1
   1  -5  -1 71.9955 6.85504   2
  -1  -5   1 66.1819 7.11238   1
  -1   5   1 76.0172 6.97071   1
   1   5  -1 64.5525 6.97036   2
  -1   5   1 74.0309 6.74492   2
  -1  -5  -1 67.0562 7.07178   1
   1  -5   1 71.6686 7.09026   1
  -1  -5  -1 69.1167 6.84039   2
   1  -5   1 72.6052 6.90565   2
   1   5   1 75.0595 6.75125   2
  -1   5  -1 77.5110 6.78897   2
   1   5   1 71.3255 6.96168   1
  -3  -5  -1 389.454 33.9364   1
  -3  -5  -1 373.628 33.7936   2
   3   5   1 370.963 33.7107   2
  -3   5  -1 358.813 33.7166   2
   3   5   1 378.075 33.8565   1
  -5  -5  -1 38.8778 4.71225   1
  -5  -5  -1 50.3858 4.50561   2
   5  -5   1 44.1490 4.20270   3
  -5   5  -1 49.6925 4.37189   2
   5   5   1 39.6812 4.53112   1
  -7  -5  -1 370.356 34.5624   2
  -7  -5  -1 414.047 34.6960   1
  -7  -5  -1 363.683 34.3713   3
   7  -5   1 377.541 34.4328   3
  -7   5  -1 365.068 34.4860   2
   7   5   1 410.644 34.6548   1
  -9  -5  -1 36.4230 4.09522   1
  -9  -5  -1 39.3963 3.88759   2
  -9  -5  -1 39.9558 3.66035   3
   9  -5   1 38.7150 3.74265   3
   9   5   1 37.0292 3.96881   1
  -9   5  -1 40.3945 3.69697   3
  -9   5  -1 34.6682 3.76008   2
 -11  -5  -1 352.813 32.3869   3
 -11  -5  -1 321.461 32.5079   2
 -11  -5  -1 345.225 32.5953   1
  11  -5   1 383.711 32.4937   3
 -11   5  -1 395.511 32.4508   3
 -11   5  -1 353.104 32.4413   2
 -13  -5  -1 56.3943 5.55504   3
 -13  -5  -1 54.4414 5.78236   1
 -13  -5  -1 59.5673 5.73758   2
  13  -5   1 63.5126 5.70898   3
 -13   5  -1 64.4814 5.65555   3
 -13   5  -1 55.0556 5.58963   2
 -15  -5  -1 88.2964 8.63047   1
 -15  -5  -1 93.1614 8.59242   2
 -15  -5  -1 85.8473 8.43834   3
  15  -5   1 102.691 8.62144   3
 -15   5  -1 86.7142 8.43075   2
  17  -5   1 122.325 11.9627   3
 -17  -5  -1 126.520 11.9376   2
 -17  -5  -1 129.797 11.9977   1
 -17  -5  -1 136.099 11.8742   3
 -19  -5  -1 15.3544 1.79173   3
  19  -5   1 12.6628 1.92023   3
 -19  -5  -1 12.1446 2.00387   1
 -19  -5  -1 13.9663 1.91763   2
 -21  -5  -1 178.414 16.4408   3
 -21  -5  -1 188.962 16.5010   2
  21  -5   1 166.286 16.5531   3
 -21  -5  -1 185.739 16.5390   1
 -23  -5  -1 8.34592 1.40578   3
 -23  -5  -1 8.73458 1.60502   2
 -23  -5  -1 9.94646 1.75895   1
 -25  -5  -1 199.803 17.9191   3
 -25  -5  -1 189.937 17.9078   2
 -25  -5  -1 193.776 17.9563   1
 -27  -5  -1 79.2105 8.15180   2
 -27  -5  -1 88.8198 8.20109   3
 -27  -5  -1 87.1007 8.23887   1
 -29  -5  -1 120.048 11.4192   1
 -29  -5  -1 123.315 11.3739   2
 -29  -5  -1 120.573 11.3800   3
 -29   5  -1 120.353 11.1910   2
 -31  -5  -1 116.953 10.1965   1
 -31  -5  -1 98.7917 10.0971   3
 -31  -5  -1 105.134 10.0895   2
 -31   5  -1 106.962 9.88057   2
 -33  -5  -1 12.4306 2.08765   2
 -33  -5  -1 12.3290 2.16945   1
 -33   5  -1 11.8580 1.76218   2
 -35  -5  -1 83.1362 8.18595   1
 -35  -5  -1 78.7685 8.12332   2
 -35   5  -1 87.5027 7.90525   2
 -37  -5  -1 3.43127 1.64789   1
 -37  -5  -1 3.03642 1.46223   2
 -37   5  -1 1.54642 1.06708   2
 -39  -5  -1 22.8086 3.33917   1
 -39  -5  -1 26.2953 3.27652   2
 -39   5  -1 26.7680 2.85917   2
 -41  -5  -1 20.1150 2.89622   2
 -41  -5  -1 20.2283 3.01815   1
 -41   5  -1 20.9157 2.47356   2
 -43  -5  -1 27.3699 3.39058   2
 -43  -5  -1 27.4464 3.52223   1
 -43   5  -1 22.7686 2.84389   2
 -45  -5  -1 42.4123 4.65422   1
 -45  -5  -1 39.2802 4.38788   2
 -45   5  -1 35.9989 3.98253   2
 -47  -5  -1 5.85132 2.15642   1
 -47  -5  -1 4.02880 1.81822   2
 -47   5  -1 5.57076 1.41879   2
 -49  -5  -1 36.5052 4.45255   1
 -49  -5  -1 31.1561 4.11094   2
 -49   5  -1 32.8385 3.60128   2
 -49   5  -1 35.5021 4.27402   1
 -51  -5  -1 -0.9018 1.77321   1
 -51  -5  -1 -0.3184 1.61079   2
 -51   5  -1 1.52328 2.04390   1
 -51   5  -1 0.90514 1.23913   2
 -53  -5  -1 21.4666 3.11876   2
 -53  -5  -1 16.5913 3.26008   1
 -53   5  -1 18.3056 3.28354   1
 -55  -5  -1 4.57756 2.03213   2
 -55  -5  -1 3.69759 2.38328   1
 -55   5  -1 3.72543 2.32870   1
 -52  -6   1 2.23391 2.29145   1
 -52  -6   1 7.73060 2.23470   2
 -52   6   1 1.68858 2.11257   1
 -50  -6   1 14.7157 2.87427   1
 -50  -6   1 11.4842 2.58316   2
 -50   6   1 11.1835 2.64739   1
 -48  -6   1 18.8951 3.15913   1
 -48  -6   1 20.6141 3.06539   2
 -48   6   1 15.9249 3.04881   1
 -46  -6   1 5.26858 1.98402   2
 -46  -6   1 5.94156 2.16749   1
 -44  -6   1 24.2914 3.37618   2
 -44  -6   1 23.5774 3.46438   1
 -42  -6   1 2.70311 1.63957   2
 -42  -6   1 1.85098 1.85349   1
 -42   6   1 2.03044 1.03601   2
 -40  -6   1 35.3911 4.22484   1
 -40  -6   1 32.1636 4.07173   2
 -40   6   1 37.3012 3.64145   2
 -38  -6   1 3.34855 1.93933   1
 -38  -6   1 2.92890 1.63712   2
 -38   6   1 5.64706 1.18479   2
 -36  -6   1 19.0323 2.80562   2
 -36  -6   1 19.8817 2.91745   1
 -36   6   1 18.0348 2.18152   2
 -34  -6   1 27.8463 3.50543   2
 -34  -6   1 27.6809 3.53924   1
 -34   6   1 30.3744 3.08850   2
 -32  -6   1 8.18455 2.08858   1
 -32  -6   1 7.69234 1.86807   2
 -32   6   1 10.0666 1.48568   2
 -30  -6   1 49.3919 5.37657   1
 -30  -6   1 52.5694 5.31592   2
 -30   6   1 50.4637 4.94564   2
 -28  -6   1 4.75503 1.79791   1
 -28  -6   1 6.35844 1.64866   2
 -28  -6   1 4.37452 1.56802   3
 -28   6   1 6.40489 1.26206   2
 -26  -6   1 122.981 11.0808   2
 -26  -6   1 112.544 10.9635   3
 -26  -6   1 116.848 11.1313   1
 -24  -6   1 23.3892 2.88566   2
 -24  -6   1 23.8343 2.68544   3
 -24  -6   1 24.7697 3.00220   1
 -24   6   1 22.5758 2.65637   2
 -22  -6   1 56.5668 5.68389   2
 -22  -6   1 52.9060 5.51318   3
 -22  -6   1 64.0067 5.86726   1
 -22   6   1 57.2105 5.40817   2
 -20  -6   1 74.6621 7.66670   3
 -20  -6   1 88.7993 7.90724   2
 -20  -6   1 83.8108 7.95110   1
 -20   6   1 83.4868 7.60887   2
 -18  -6   1 6.73372 1.11590   3
 -18  -6   1 7.56007 1.56828   2
 -18  -6   1 6.31601 1.65462   1
 -18   6   1 5.56239 1.12025   2
 -16  -6   1 74.2466 7.20447   1
 -16  -6   1 71.1815 6.84369   3
 -16  -6   1 73.6722 7.11810   2
 -16   6   1 74.4400 6.84090   2
 -14  -6   1 0.53342 1.45087   1
 -14  -6   1 1.72972 0.64238   3
 -14  -6   1 1.30079 1.17697   2
 -14   6   1 0.54183 0.77087   2
 -12  -6   1 87.8285 7.95850   3
 -12  -6   1 84.9961 8.27077   2
 -12  -6   1 84.4590 8.38163   1
 -12   6   1 85.0378 8.02388   2
 -12   6   1 88.4061 7.96610   3
 -10  -6   1 15.7571 2.44973   1
 -10  -6   1 17.0527 1.70042   3
 -10  -6   1 15.5785 2.24513   2
 -10   6   1 15.6768 1.88782   2
  -8  -6   1 40.4503 4.43905   2
  -8  -6   1 47.8911 4.74698   1
  -8   6   1 43.9726 4.23090   2
  -6  -6   1 60.8832 6.35252   1
  -6  -6   1 65.1175 6.21164   2
  -4  -6   1 23.3376 2.49184   2
  -4  -6   1 13.7530 2.81656   1
  -2  -6   1 161.562 14.8939   2
   2  -6  -1 160.264 14.8481   2
  -2  -6   1 162.039 15.0859   1
   0  -6   1 -3.5748 1.51061   1
   0  -6  -1 3.97216 1.32405   2
   0  -6   1 4.84420 1.36445   2
   0  -6  -1 -1.4923 1.51382   1
  -2  -6  -1 162.521 15.0400   2
  -2  -6  -1 164.209 15.2025   1
  -4  -6  -1 13.9452 2.63338   1
  -4  -6  -1 21.9975 2.36227   2
  -6  -6  -1 65.7158 6.15703   2
  -6  -6  -1 60.2235 6.30768   1
  -8  -6  -1 41.1537 4.49030   1
  -8  -6  -1 43.5739 4.35275   2
 -10  -6  -1 16.2125 2.11255   2
 -10  -6  -1 14.0491 1.60258   3
 -10  -6  -1 16.3040 2.31064   1
 -12  -6  -1 76.9616 7.62058   3
 -12  -6  -1 81.9860 7.85628   2
 -12  -6  -1 95.3237 8.04722   1
 -14  -6  -1 1.01024 1.38788   1
 -14  -6  -1 1.93583 1.14342   2
 -14  -6  -1 1.54970 0.72445   3
 -16  -6  -1 73.4535 6.98895   3
 -16  -6  -1 75.8278 7.27092   1
 -16  -6  -1 74.7645 7.18059   2
 -18  -6  -1 6.95214 1.23108   3
 -18  -6  -1 8.60427 1.73377   1
 -18  -6  -1 8.44241 1.61018   2
 -20  -6  -1 83.5460 8.21298   1
 -20  -6  -1 88.0280 8.05942   3
 -20  -6  -1 82.4955 8.14261   2
 -22  -6  -1 58.3149 6.02291   1
 -22  -6  -1 59.5156 6.00133   2
 -22  -6  -1 61.4846 5.87800   3
 -24  -6  -1 28.2481 3.01285   2
 -24  -6  -1 24.4609 2.99234   1
 -24  -6  -1 21.0627 2.70905   3
 -26  -6  -1 119.572 10.6735   2
 -26  -6  -1 102.232 10.5441   3
 -26  -6  -1 119.168 10.6994   1
 -28  -6  -1 3.06922 1.46588   3
 -28  -6  -1 6.84745 1.72993   1
 -28  -6  -1 6.29675 1.63433   2
 -30  -6  -1 50.9150 5.38253   2
 -30  -6  -1 51.3630 5.42556   1
 -30   6  -1 54.0058 5.19115   2
 -32  -6  -1 8.57037 1.98762   1
 -32  -6  -1 7.79818 1.90343   2
 -32   6  -1 9.33999 1.61399   2
 -34  -6  -1 32.0589 3.67843   1
 -34  -6  -1 24.6806 3.52143   2
 -34   6  -1 29.9976 3.15913   2
 -36  -6  -1 19.6787 2.74293   2
 -36  -6  -1 18.6986 2.81295   1
 -36   6  -1 17.1643 2.30339   2
 -38  -6  -1 2.93863 1.73916   1
 -38  -6  -1 5.57130 1.71627   2
 -38   6  -1 4.33357 1.25570   2
 -40  -6  -1 37.5999 4.33784   1
 -40  -6  -1 36.0694 4.16686   2
 -40   6  -1 35.5699 3.76920   2
 -42  -6  -1 0.07143 1.60753   2
 -42  -6  -1 1.03438 1.74187   1
 -42   6  -1 1.77440 1.13207   2
 -44  -6  -1 21.1571 3.36978   2
 -44  -6  -1 29.1362 3.71897   1
 -44   6  -1 26.6032 2.93760   2
 -46  -6  -1 4.96734 2.11531   1
 -46  -6  -1 7.28353 1.97876   2
 -46   6  -1 5.17450 1.47641   2
 -48  -6  -1 18.5244 3.20306   1
 -48  -6  -1 19.8028 3.08401   2
 -50  -6  -1 9.50216 2.62933   1
 -50  -6  -1 15.4097 2.70106   2
 -52  -6  -1 3.76019 2.06749   2
 -52  -6  -1 5.21033 2.32594   1
 -52   6  -1 2.24168 2.10422   1
 -47  -7   1 1.59851 1.87954   2
 -47  -7   1 4.66010 2.25158   1
 -45  -7   1 12.0055 2.61810   2
 -45  -7   1 14.8614 2.85137   1
 -43  -7   1 3.49208 2.05535   1
 -43  -7   1 2.82359 1.82750   2
 -41  -7   1 4.94984 1.92683   2
 -41  -7   1 7.29600 2.18352   1
 -39  -7   1 16.3169 2.83010   1
 -39  -7   1 16.0922 2.72815   2
 -37  -7   1 1.19072 1.71293   1
 -37  -7   1 3.18925 1.69898   2
 -35  -7   1 16.6107 2.85635   1
 -35  -7   1 16.2923 2.63969   2
 -35   7   1 16.8312 2.11118   2
 -33  -7   1 1.97085 1.66576   2
 -33  -7   1 3.13724 1.82698   1
 -33   7   1 1.93323 1.10063   2
 -31  -7   1 29.3106 3.70207   1
 -31  -7   1 26.9081 3.53514   2
 -31   7   1 27.8051 3.06626   2
 -29  -7   1 18.0185 2.85590   1
 -29  -7   1 18.4377 2.71488   2
 -27  -7   1 24.1195 3.29186   1
 -27  -7   1 24.5053 3.21717   2
 -25  -7   1 50.0710 5.30915   2
 -25  -7   1 51.6567 5.47351   1
 -23  -7   1 3.45360 1.81589   1
 -23  -7   1 3.19662 1.55664   2
 -21  -7   1 47.5010 4.75940   3
 -21  -7   1 48.0467 5.03826   2
 -21  -7   1 49.0122 5.12768   1
 -19  -7   1 4.48057 1.64304   2
 -19  -7   1 5.75757 1.14460   3
 -19  -7   1 4.32111 1.86111   1
 -17  -7   1 59.2931 5.83447   1
 -17  -7   1 55.3428 5.64018   2
 -17  -7   1 53.8815 5.30532   3
 -15  -7   1 26.1871 2.70880   3
 -15  -7   1 26.5060 3.28326   1
 -15  -7   1 26.8199 3.17791   2
 -13  -7   1 12.4285 1.57021   3
 -13  -7   1 19.9265 2.59391   1
 -13  -7   1 18.5071 2.33515   2
 -11  -7   1 34.3357 3.94301   2
 -11  -7   1 39.0313 4.22742   1
  -9  -7   1 3.13223 1.80848   1
  -9  -7   1 4.84571 1.64640   2
  -7  -7   1 38.3685 4.24158   2
  -7  -7   1 39.8416 4.48500   1
  -5  -7   1 8.47297 1.79483   2
  -5  -7   1 3.93909 1.96892   1
  -3  -7   1 87.3561 8.63230   2
  -3  -7   1 92.8546 8.87112   1
  -1  -7   1 29.9807 3.80987   1
  -1  -7  -1 28.7524 3.29259   2
  -3  -7  -1 94.5546 8.95863   1
  -3  -7  -1 89.9972 8.79651   2
  -5  -7  -1 6.02543 1.54096   2
  -5  -7  -1 2.50990 1.81952   1
  -7  -7  -1 40.9273 4.25888   1
  -7  -7  -1 34.3283 3.98548   2
  -9  -7  -1 3.47532 1.47235   2
  -9  -7  -1 4.44429 1.74884   1
 -11  -7  -1 38.2809 4.16394   1
 -11  -7  -1 37.6229 4.00626   2
 -11  -7  -1 36.2584 3.51257   3
 -13  -7  -1 12.8637 2.36522   1
 -13  -7  -1 15.9782 1.77604   3
 -13  -7  -1 17.7767 2.37199   2
 -15  -7  -1 32.7269 3.39236   1
 -15  -7  -1 25.5723 2.80552   3
 -15  -7  -1 27.6495 3.28027   2
 -17  -7  -1 53.0364 5.23552   3
 -17  -7  -1 58.7621 5.65783   1
 -17  -7  -1 52.8882 5.49039   2
 -19  -7  -1 5.45254 1.24496   3
 -19  -7  -1 6.43281 1.64919   2
 -19  -7  -1 6.39269 1.85359   1
 -21  -7  -1 39.6583 4.36651   3
 -21  -7  -1 49.0365 4.66510   2
 -21  -7  -1 45.9377 4.73392   1
 -23  -7  -1 3.67263 1.55686   2
 -23  -7  -1 2.56104 1.61999   1
 -25  -7  -1 53.9334 5.60582   2
 -25  -7  -1 53.0764 5.60809   1
 -27  -7  -1 22.8616 3.18059   1
 -27  -7  -1 24.4308 3.13908   2
 -29  -7  -1 19.4447 2.75026   2
 -29  -7  -1 18.1029 2.84158   1
 -31  -7  -1 28.4382 3.58149   2
 -31  -7  -1 28.3319 3.62158   1
 -33  -7  -1 1.25512 1.67800   2
 -33  -7  -1 3.84228 1.78743   1
 -33   7  -1 3.11621 1.31116   2
 -35  -7  -1 18.4186 2.77116   1
 -35  -7  -1 14.8231 2.63182   2
 -35   7  -1 14.5891 2.13953   2
 -37  -7  -1 2.59646 1.71394   2
 -37  -7  -1 1.48245 1.75837   1
 -37   7  -1 1.75310 1.27881   2
 -39  -7  -1 17.3207 2.77033   1
 -39  -7  -1 15.6789 2.74681   2
 -39   7  -1 15.8846 2.16729   2
 -41  -7  -1 4.64127 2.02082   2
 -41  -7  -1 3.56005 1.94468   1
 -43  -7  -1 6.51943 2.09311   2
 -43  -7  -1 2.54117 2.03176   1
 -45  -7  -1 14.3462 2.73632   2
 -45  -7  -1 15.6253 2.87971   1
 -47  -7  -1 0.98914 1.95628   2
 -47  -7  -1 1.99902 2.04735   1
 -42  -8   1 0.46782 1.91478   2
 -42  -8   1 0.00247 2.03728   1
 -40  -8   1 21.2319 3.07651   2
 -40  -8   1 13.8447 2.98692   1
 -38  -8   1 1.42593 1.77580   2
 -38  -8   1 4.86345 2.19312   1
 -36  -8   1 6.14699 2.20865   1
 -36  -8   1 4.21412 1.90490   2
 -34  -8   1 6.43515 2.05405   2
 -34  -8   1 6.97644 2.23607   1
 -32  -8   1 0.19828 1.68664   2
 -32  -8   1 0.01688 1.71072   1
 -30  -8   1 12.4119 2.37758   2
 -30  -8   1 9.37516 2.33464   1
 -28  -8   1 0.87933 1.67185   2
 -28  -8   1 3.51593 1.87983   1
 -26  -8   1 30.8844 3.91445   2
 -26  -8   1 31.6563 4.03207   1
 -24  -8   1 11.7584 2.28186   2
 -24  -8   1 10.3327 2.39928   1
 -22  -8   1 16.3061 2.69667   1
 -22  -8   1 11.9270 2.39949   2
 -20  -8   1 14.0209 2.41561   2
 -20  -8   1 12.6042 2.50636   1
 -18  -8   1 1.42393 1.71735   1
 -18  -8   1 0.75404 1.63785   2
 -16  -8   1 8.47621 2.19881   1
 -16  -8   1 7.59095 1.98664   2
 -14  -8   1 3.16233 1.78339   2
 -14  -8   1 4.89739 1.95266   1
 -12  -8   1 19.9840 2.91482   2
 -12  -8   1 19.3862 3.03492   1
 -10  -8   1 4.10793 1.85904   1
 -10  -8   1 1.82970 1.62138   2
  -8  -8   1 5.60055 1.94062   2
  -8  -8   1 6.16141 2.12218   1
  -6  -8   1 6.78572 2.13165   1
  -6  -8   1 6.24930 1.91099   2
  -4  -8   1 13.1793 2.32590   2
  -4  -8   1 12.2073 2.51260   1
  -2  -8  -1 37.0167 4.12443   2
  -4  -8  -1 11.7431 2.28189   1
  -4  -8  -1 10.1674 2.13704   2
  -6  -8  -1 6.34349 2.05146   1
  -6  -8  -1 8.23818 1.95231   2
  -8  -8  -1 7.33822 2.07482   1
  -8  -8  -1 7.80628 1.95772   2
 -10  -8  -1 6.65833 1.99765   1
 -10  -8  -1 4.99950 1.72569   2
 -12  -8  -1 25.5024 3.21087   1
 -12  -8  -1 18.7603 2.94196   2
 -14  -8  -1 2.75988 1.64051   2
 -14  -8  -1 1.42011 1.70707   1
 -16  -8  -1 7.85303 2.00772   2
 -16  -8  -1 11.1245 2.23325   1
 -18  -8  -1 4.56712 1.65115   2
 -18  -8  -1 -0.1585 1.53772   1
 -20  -8  -1 12.3389 2.26830   2
 -20  -8  -1 12.6712 2.41754   1
 -22  -8  -1 14.5867 2.50277   2
 -22  -8  -1 14.3286 2.57686   1
 -24  -8  -1 11.1610 2.20324   2
 -24  -8  -1 10.7227 2.25968   1
 -26  -8  -1 35.5604 4.07223   1
 -26  -8  -1 32.1144 3.91854   2
 -28  -8  -1 2.71591 1.80993   1
 -28  -8  -1 1.68976 1.66410   2
 -30  -8  -1 11.3549 2.33750   1
 -30  -8  -1 7.87788 2.15695   2
 -32  -8  -1 0.83819 1.69902   1
 -32  -8  -1 -0.3258 1.67267   2
 -34  -8  -1 5.80916 2.10173   1
 -34  -8  -1 4.84253 1.91011   2
 -36  -8  -1 5.86805 2.03091   1
 -36  -8  -1 5.71105 2.10418   2
 -38  -8  -1 10.2178 2.34333   2
 -38  -8  -1 4.23844 2.10323   1
 -40  -8  -1 15.4442 3.00367   2
 -40  -8  -1 21.4555 3.22608   1
 -42  -8  -1 -1.5172 1.73373   2
 -42  -8  -1 -0.0854 1.97767   1
 -37  -9   1 4.71243 2.22797   1
 -35  -9   1 6.99154 2.34279   1
 -35  -9   1 3.54733 2.11692   2
 -33  -9   1 0.01840 1.94086   1
 -33  -9   1 -0.2005 1.81284   2
 -31  -9   1 8.87023 2.38462   2
 -31  -9   1 5.15767 2.24991   1
 -29  -9   1 3.02401 2.00020   2
 -29  -9   1 3.65782 2.09963   1
 -27  -9   1 5.38997 2.24834   1
 -27  -9   1 7.04179 2.16693   2
 -25  -9   1 13.2743 2.69769   1
 -25  -9   1 13.5644 2.61871   2
 -23  -9   1 1.15636 1.88331   1
 -23  -9   1 3.22856 1.94061   2
 -21  -9   1 17.8351 3.00718   2
 -21  -9   1 21.6312 3.20913   1
 -19  -9   1 3.32633 2.04596   1
 -19  -9   1 3.44916 1.94492   2
 -17  -9   1 12.6209 2.62970   2
 -17  -9   1 14.9384 2.76116   1
 -15  -9   1 7.29517 2.19911   2
 -15  -9   1 8.33434 2.28186   1
 -13  -9   1 6.67496 2.01039   2
 -13  -9   1 3.55936 2.09769   1
 -11  -9   1 18.3022 2.91959   2
 -11  -9   1 17.6758 3.05113   1
  -9  -9   1 0.53246 1.94857   1
  -9  -9   1 2.98586 1.82898   2
  -7  -9   1 28.3582 3.65583   2
  -7  -9   1 26.4912 3.74970   1
  -5  -9   1 2.54939 2.07775   1
  -5  -9  -1 5.92889 1.88161   2
  -7  -9  -1 29.6364 3.93616   1
  -7  -9  -1 32.1936 3.78500   2
  -9  -9  -1 2.62674 1.93804   1
  -9  -9  -1 -1.2223 1.62242   2
 -11  -9  -1 18.2002 2.98225   1
 -11  -9  -1 17.5196 2.86054   2
 -13  -9  -1 6.24475 2.14354   1
 -13  -9  -1 7.54763 2.04699   2
 -15  -9  -1 6.72405 2.08149   2
 -15  -9  -1 8.24945 2.25602   1
 -17  -9  -1 15.0776 2.63610   1
 -17  -9  -1 10.7708 2.48627   2
 -19  -9  -1 4.32501 2.03180   1
 -19  -9  -1 5.81441 1.98180   2
 -21  -9  -1 18.5611 2.98801   1
 -21  -9  -1 18.9576 2.94271   2
 -23  -9  -1 3.94812 1.93316   1
 -23  -9  -1 2.84812 1.92046   2
 -25  -9  -1 13.9920 2.69492   1
 -25  -9  -1 16.3869 2.76666   2
 -27  -9  -1 8.91487 2.28149   2
 -27  -9  -1 5.30046 2.06968   1
 -29  -9  -1 1.24102 1.94853   2
 -29  -9  -1 1.90071 1.93294   1
 -31  -9  -1 5.75386 2.16685   1
 -31  -9  -1 7.00600 2.23510   2
 -33  -9  -1 2.63424 2.00429   2
 -33  -9  -1 1.99671 1.99816   1
 -35  -9  -1 4.22468 2.17825   1
 -35  -9  -1 6.81874 2.26901   2
 -26 -10   1 12.2536 2.82501   2
 -26 -10   1 13.3245 2.87176   1
 -24 -10   1 4.71870 2.23487   2
 -24 -10   1 7.62019 2.46093   1
 -22 -10   1 8.14403 2.47070   2
 -22 -10   1 10.2909 2.61878   1
 -20 -10   1 16.5890 2.97494   1
 -20 -10   1 14.9304 2.95252   2
 -18 -10   1 3.19405 2.08033   2
 -18 -10   1 1.24622 2.06089   1
 -16 -10   1 12.6233 2.74489   1
 -16 -10   1 12.5432 2.77207   2
 -14 -10   1 -0.4433 2.02447   1
 -14 -10   1 3.56483 2.05302   2
 -12 -10   1 7.58553 2.33033   1
 -12 -10   1 10.0943 2.53242   2
 -10 -10   1 6.09854 2.06919   2
 -10 -10   1 3.41716 2.17917   1
  -8 -10  -1 9.73589 2.45003   2
 -10 -10  -1 4.55145 2.06444   2
 -10 -10  -1 4.37304 2.04871   1
 -12 -10  -1 7.71317 2.32901   2
 -12 -10  -1 10.2459 2.42433   1
 -14 -10  -1 2.01500 1.96754   1
 -14 -10  -1 -1.6484 1.76240   2
 -16 -10  -1 17.1063 2.97196   2
 -16 -10  -1 14.8354 2.88190   1
 -18 -10  -1 -2.4736 1.80741   2
 -18 -10  -1 0.38837 1.92100   1
 -20 -10  -1 17.6458 2.95938   1
 -20 -10  -1 13.0670 2.80223   2
 -22 -10  -1 10.4301 2.57520   2
 -22 -10  -1 9.69424 2.56579   1
 -24 -10  -1 6.68398 2.39648   1
 -24 -10  -1 6.25683 2.25968   2
 -26 -10  -1 15.8200 2.96493   1
 -26 -10  -1 15.0213 2.90698   2
 -62   0   2 0.52853 2.02629   1
 -62   0   2 -1.7461 1.45218   2
 -60   0   2 5.21133 1.64753   2
 -60   0   2 -2.9857 1.87508   1
 -58   0   2 0.06254 1.39001   2
 -58   0   2 -0.4588 2.01985   1
 -56   0   2 50.8491 5.75631   1
 -56   0   2 49.3246 5.19509   2
 -54   0   2 8.17638 2.31479   1
 -54   0   2 4.78213 1.59849   2
 -52   0   2 68.8358 6.90364   2
 -52   0   2 72.8099 7.42443   1
 -50   0   2 17.7561 3.00131   1
 -50   0   2 19.4001 2.54036   2
 -48   0   2 0.77794 1.24201   2
 -48   0   2 0.54343 1.71508   1
 -46   0   2 1.38264 1.66710   1
 -46   0   2 0.44902 1.18719   2
 -44   0   2 7.25984 2.06914   1
 -44   0   2 9.78723 1.64667   2
 -42   0   2 105.975 10.8811   1
 -42   0   2 120.287 10.6529   2
 -40   0   2 29.7842 3.04350   2
 -40   0   2 24.3944 3.36471   1
 -38   0   2 274.968 24.7392   2
 -38   0   2 269.122 24.9891   1
 -36   0   2 105.691 9.28329   2
 -36   0   2 91.9439 9.46038   1
 -34   0   2 33.0691 3.46226   2
 -34   0   2 35.6291 3.75155   1
 -32   0   2 6.29936 1.18328   2
 -32   0   2 6.76323 1.55062   1
 -30   0   2 55.1424 5.99661   1
 -30   0   2 66.4438 5.83630   2
 -28   0   2 207.910 18.9469   1
 -28   0   2 201.673 18.7681   2
  28   0  -2 210.939 18.7892   2
 -26   0   2 87.0545 7.99043   1
  26   0  -2 85.2699 7.80568   2
 -26   0   2 82.3020 7.79844   2
 -26   0   2 81.6218 8.47664   3
 -24   0   2 1918.85 177.992   1
 -24   0   2 2060.00 178.043   3
 -24   0   2 1971.03 177.856   2
 -22   0   2 863.348 76.7545   2
  22   0  -2 906.682 76.7683   2
 -22   0   2 793.344 76.8689   1
 -20   0   2 299.725 26.5974   2
 -20   0   2 289.757 26.7112   1
  20   0  -2 295.215 26.6022   2
  18   0  -2 193.272 17.3991   2
 -18   0   2 178.875 17.5242   3
 -18   0   2 200.649 17.4024   2
 -18   0   2 197.177 17.5155   1
 -16   0   2 107.614 8.98870   3
 -16   0   2 95.5614 8.93672   1
  16   0  -2 81.8233 8.88412   1
 -16   0   2 97.7945 8.82322   2
  16   0  -2 100.096 8.82941   2
 -14   0   2 645.009 64.2979   1
  14   0  -2 745.045 64.3135   1
 -14   0   2 705.817 64.2151   2
  14   0  -2 766.604 64.2291   2
 -12   0   2 44.6185 4.56007   1
 -12   0   2 47.4622 4.46949   2
  12   0  -2 51.2278 4.48709   2
  12   0  -2 50.5966 4.58303   1
 -10   0   2 1046.17 93.2856   1
 -10   0   2 1008.81 93.2727   2
  10   0  -2 1031.54 93.2238   2
  10   0  -2 1073.16 93.2860   1
  -8   0   2 1048.88 89.2453   1
   8   0  -2 975.747 89.2322   1
   8   0  -2 991.513 89.1885   2
  -8   0   2 964.767 89.1908   2
  -6   0   2 864.896 75.7636   1
   6   0  -2 839.493 75.7235   2
   6   0  -2 879.046 75.7582   1
  -6   0   2 796.740 75.7205   2
  -4   0   2 919.380 81.3112   1
   4   0  -2 894.236 81.2680   1
   2   0  -2 1.65568 0.29755   1
   0   0  -2 0.17498 0.32971   1
  -4   0  -2 941.691 95.6070   2
  -4   0  -2 1189.35 95.6224   3
   6   0   2 837.273 71.6575   3
  -6   0  -2 814.050 71.6155   2
  -6   0  -2 812.824 71.6611   3
   6   0   2 730.012 71.6013   2
  -8   0  -2 977.921 92.1625   2
   8   0   2 1004.98 92.2280   3
   8   0   2 1053.07 92.1741   2
  -8   0  -2 1075.59 92.2275   3
  10   0   2 1064.45 98.3337   3
 -10   0  -2 1111.81 98.3405   3
 -10   0  -2 1043.08 98.2699   2
  10   0   2 1163.83 98.2845   2
 -12   0  -2 47.0275 4.62271   2
 -12   0  -2 52.3138 4.71175   3
  12   0   2 52.7823 4.73798   3
  12   0   2 45.9168 4.62947   2
 -14   0  -2 795.574 67.4258   3
  14   0   2 726.737 67.4365   3
  14   0   2 762.788 67.3420   2
 -14   0  -2 714.827 67.3326   2
  16   0   2 90.8647 8.96724   2
 -16   0  -2 98.5065 8.99194   2
 -16   0  -2 111.924 9.09599   1
 -16   0  -2 102.321 9.07800   3
  16   0   2 88.0939 9.09461   3
 -18   0  -2 221.445 17.6500   3
  18   0   2 185.105 17.5112   2
  18   0   2 211.086 17.6931   3
 -18   0  -2 171.139 17.5666   1
 -18   0  -2 176.429 17.4987   2
  20   0   2 335.358 28.3049   3
 -20   0  -2 305.084 28.2129   1
 -20   0  -2 294.044 28.1172   2
  22   0   2 830.347 78.3109   2
 -22   0  -2 890.975 78.3222   2
  22   0   2 902.060 78.5191   3
 -22   0  -2 863.948 78.4055   1
  24   0   2 1935.51 173.917   3
 -24   0  -2 1999.61 173.819   1
 -24   0  -2 1808.93 173.808   3
 -24   0  -2 1969.09 173.721   2
  24   0   2 1972.16 173.726   2
 -26   0  -2 80.2133 7.65473   2
  26   0   2 82.5775 7.96685   3
 -26   0  -2 79.9611 8.08814   3
 -26   0  -2 85.6159 7.81659   1
  28   0   2 169.559 17.8799   3
 -28   0  -2 201.775 17.6869   2
 -28   0  -2 213.454 17.8699   1
 -30   0  -2 66.3982 6.11645   1
 -30   0  -2 64.3002 5.92815   2
  30   0   2 55.4334 6.21634   3
 -32   0  -2 5.94665 1.27194   2
 -32   0  -2 6.90569 1.59115   1
  32   0   2 4.68570 1.57460   3
 -34   0  -2 31.7124 3.64799   1
  34   0   2 32.0217 3.88458   3
 -34   0  -2 34.5543 3.47665   2
 -36   0  -2 102.380 9.65100   2
  36   0   2 104.494 10.0795   3
 -36   0  -2 102.963 9.86034   1
 -38   0  -2 289.572 25.2731   1
 -38   0  -2 256.740 25.0291   2
  38   0   2 281.837 25.4920   3
 -40   0  -2 32.5105 3.56814   1
 -40   0  -2 27.2555 3.21461   2
 -42   0  -2 108.966 10.5860   2
 -42   0  -2 118.515 10.9208   1
 -44   0  -2 6.86323 1.59283   2
 -44   0  -2 9.14957 2.18289   1
 -46   0  -2 1.62681 1.79789   1
 -46   0  -2 1.93324 1.35475   2
 -48   0  -2 0.00093 1.73336   1
 -48   0  -2 2.44692 1.40836   2
 -50   0  -2 16.6561 2.45869   2
 -50   0  -2 17.9742 2.99717   1
 -52   0  -2 74.8042 7.12033   1
 -52   0  -2 60.1044 6.50188   2
 -54   0  -2 5.17912 2.32731   1
 -54   0  -2 9.48246 1.88328   2
 -56   0  -2 50.7124 5.33322   2
 -56   0  -2 51.4253 5.85092   1
 -58   0  -2 0.87964 1.45813   2
 -58   0  -2 0.60289 2.09966   1
 -60   0  -2 2.80155 2.31928   1
 -60   0  -2 3.00456 1.60731   2
 -62   0  -2 -1.3069 1.46421   2
 -62   0  -2 -1.7789 2.10711   1
 -61  -1   2 18.6148 3.52652   1
 -61  -1   2 19.7811 2.97311   2
 -61   1   2 23.4071 2.84044   2
 -61   1   2 17.3706 3.39392   1
 -59  -1   2 3.72827 1.66775   2
 -59  -1   2 3.37725 2.17299   1
 -59   1   2 4.70768 2.20242   1
 -59   1   2 3.16124 1.51795   2
 -57  -1   2 9.39146 2.61125   1
 -57  -1   2 11.2349 2.10566   2
 -57   1   2 8.82686 1.84879   2
 -57   1   2 8.96181 2.50257   1
 -55  -1   2 1.46598 1.49268   2
 -55  -1   2 4.34004 2.10633   1
 -55   1   2 2.14174 1.98489   1
 -55   1   2 3.23519 1.37947   2
 -53  -1   2 0.94164 1.86573   1
 -53  -1   2 1.83808 1.53338   2
 -53   1   2 -0.0306 1.73544   1
 -53   1   2 0.55068 1.26520   2
 -51  -1   2 41.3078 4.08118   2
 -51  -1   2 34.5013 4.39363   1
 -51   1   2 36.4812 3.87316   2
 -51   1   2 28.6436 4.33979   1
 -49  -1   2 4.52353 1.48263   2
 -49  -1   2 1.88432 1.81706   1
 -49   1   2 4.50761 1.37468   2
 -49   1   2 2.42304 1.92025   1
 -47  -1   2 66.0380 6.23660   2
 -47  -1   2 59.7099 6.44518   1
 -47   1   2 64.6732 6.09601   2
 -47   1   2 56.8789 6.51591   1
 -45  -1   2 24.8380 3.50772   1
 -45  -1   2 26.9450 3.21550   2
 -45   1   2 30.2391 3.58051   1
 -45   1   2 28.6184 3.08300   2
 -43  -1   2 66.8214 7.01575   1
 -43  -1   2 73.4101 6.83870   2
 -43   1   2 69.8493 6.72875   2
 -43   1   2 69.2463 7.11204   1
 -41  -1   2 36.7239 4.30880   1
 -41  -1   2 38.3449 4.00930   2
 -41   1   2 39.1395 4.32319   1
 -41   1   2 38.2178 3.91588   2
 -39  -1   2 5.40910 1.29576   2
 -39  -1   2 4.87395 1.58982   1
 -39   1   2 3.51405 1.59827   1
 -39   1   2 5.62119 1.24744   2
 -37  -1   2 7.23299 1.72350   1
 -37  -1   2 8.53243 1.42606   2
 -37   1   2 5.70661 1.67547   1
 -37   1   2 7.43311 1.33164   2
 -35  -1   2 7.35532 1.38398   2
 -35  -1   2 6.31483 1.64964   1
 -35   1   2 7.96992 1.69069   1
 -35   1   2 8.26315 1.31222   2
 -33  -1   2 88.9078 9.62326   1
 -33  -1   2 103.109 9.48359   2
 -33   1   2 106.555 9.71258   1
 -33   1   2 108.188 9.44860   2
  31  -1  -2 120.228 11.2012   2
 -31  -1   2 121.075 11.2284   2
 -31  -1   2 115.258 11.3759   1
 -31   1   2 124.817 11.1810   2
 -31   1   2 127.653 11.4278   1
 -29  -1   2 216.398 19.5532   2
  29  -1  -2 223.954 19.5377   2
 -29  -1   2 212.581 19.6919   1
 -29   1   2 213.643 19.4951   2
 -29   1   2 207.889 19.7069   1
 -27  -1   2 158.560 15.5895   1
 -27  -1   2 175.152 15.6630   3
 -27  -1   2 164.475 15.4765   2
 -27   1   2 169.406 15.6519   1
 -27   1   2 180.213 15.4477   2
 -25  -1   2 19.7158 2.33805   1
 -25  -1   2 22.5821 2.22288   2
 -25  -1   2 17.1277 2.25238   3
 -25   1   2 21.4092 2.12867   2
 -25   1   2 18.2187 2.34531   1
  25   1  -2 18.3974 2.10671   2
 -23  -1   2 2.41572 0.84846   2
 -23  -1   2 3.75612 1.07124   1
  23  -1  -2 1.98233 0.77944   2
 -23   1   2 0.66496 1.16599   1
  23   1  -2 2.52519 0.82830   2
 -23   1   2 1.43997 0.89389   3
 -23   1   2 1.90913 0.75783   2
 -21  -1   2 9.47112 1.42417   1
 -21  -1   2 10.0607 1.27338   2
 -21  -1   2 12.0716 1.51277   3
  21  -1  -2 9.09312 1.17212   2
 -21   1   2 8.96473 1.17007   2
 -21   1   2 9.17315 1.38552   3
  21   1  -2 5.64605 1.22945   1
 -21   1   2 9.85686 1.56911   1
 -19  -1   2 42.9184 4.20246   1
 -19  -1   2 44.2832 4.11358   2
  19  -1  -2 43.4153 4.06272   2
 -19  -1   2 47.7938 4.25504   3
 -19   1   2 42.6452 4.28462   1
 -19   1   2 38.0439 4.01634   2
 -17  -1   2 68.2819 6.70673   1
  17  -1  -2 72.7015 6.58602   2
 -17  -1   2 68.2708 6.61735   2
 -17  -1   2 67.9159 6.71170   3
 -17   1   2 79.2933 6.80175   1
  17   1  -2 75.7270 6.61754   2
 -17   1   2 71.0775 6.55875   2
  15  -1  -2 125.301 11.4114   2
 -15  -1   2 124.561 11.5320   1
 -15  -1   2 123.072 11.4510   2
  15   1  -2 124.649 11.4438   2
 -15   1   2 127.955 11.5553   1
 -15   1   2 130.334 11.4047   2
  13  -1  -2 570.588 49.6077   2
 -13  -1   2 562.175 49.6540   2
 -13  -1   2 535.204 49.6961   1
 -13   1   2 526.807 49.5940   2
  13   1  -2 569.318 49.6511   2
 -11  -1   2 106.788 9.46789   1
 -11  -1   2 106.501 9.41693   2
  11  -1  -2 106.895 9.35398   2
  11   1  -2 103.426 9.39493   2
 -11   1   2 94.7434 9.33684   2
  -9  -1   2 66.3750 6.80389   2
  -9  -1   2 68.3260 6.86682   1
   9  -1  -2 79.5819 6.75746   2
   9   1  -2 79.9772 6.82684   2
  -9   1   2 75.8116 6.74282   2
  -7  -1   2 2.90346 0.79713   1
  -7  -1   2 3.99687 0.72651   2
  -7   1   2 4.45546 0.50595   2
  -5  -1   2 137.775 11.8032   2
  -5  -1   2 124.214 11.8304   1
   5   1  -2 129.234 11.7972   2
   3   1  -2 86.9101 7.88174   2
   1  -1  -2 1355.12 125.689   2
  -1   1   2 1449.77 125.734   2
   1  -1   2 1184.34 113.255   1
  -1  -1  -2 1399.30 113.392   2
  -1  -1  -2 1198.83 113.175   1
   1   1   2 1274.34 113.248   3
  -3  -1  -2 167.238 17.2033   1
  -3  -1  -2 219.778 17.2365   2
  -3  -1  -2 196.604 17.2904   3
   3  -1   2 190.720 17.2995   3
  -3   1  -2 191.672 17.3039   3
   3   1   2 206.276 17.2107   1
   3   1   2 167.285 17.2507   3
   3   1   2 193.861 17.2247   2
  -5  -1  -2 137.252 12.4217   3
   5  -1   2 119.628 12.4182   3
  -5  -1  -2 152.183 12.3811   2
  -5  -1  -2 143.160 12.3588   1
   5   1   2 138.099 12.3771   2
   5   1   2 130.269 12.3502   1
  -5   1  -2 139.647 12.4428   3
   5   1   2 136.623 12.3998   3
   7  -1   2 3.31333 0.82839   3
  -7  -1  -2 4.65597 0.75465   1
  -7  -1  -2 4.93948 0.76444   2
  -7  -1  -2 4.56262 0.81358   3
   7   1   2 6.50635 0.78636   1
   7   1   2 4.72276 0.78244   3
   7   1   2 5.18223 0.76631   2
  -9  -1  -2 72.5864 6.58183   2
   9  -1   2 63.6489 6.66062   3
  -9  -1  -2 72.5088 6.57759   1
  -9  -1  -2 73.4101 6.63651   3
   9   1   2 74.1998 6.64975   3
   9   1   2 72.7306 6.58166   1
 -11  -1  -2 122.050 9.51624   3
 -11  -1  -2 95.2662 9.41349   2
  11  -1   2 101.768 9.50117   3
 -11  -1  -2 106.791 9.43484   1
  11   1   2 88.9830 9.40412   1
 -11   1  -2 96.7786 9.41820   2
  11   1   2 112.229 9.50413   3
  13  -1   2 566.530 49.1311   3
 -13  -1  -2 575.543 49.0986   3
 -13  -1  -2 498.071 49.0129   2
 -13  -1  -2 540.706 49.0336   1
  13   1   2 556.626 49.0995   3
  13   1   2 534.749 49.0362   1
 -13   1  -2 546.885 49.0280   2
  15  -1   2 140.462 11.7668   3
 -15  -1  -2 120.285 11.6354   1
 -15  -1  -2 131.793 11.6906   3
 -15  -1  -2 121.189 11.6059   2
  15   1   2 119.372 11.6404   1
 -15   1  -2 129.238 11.6253   2
  15   1   2 129.935 11.7048   3
  17  -1   2 73.6660 7.13522   3
 -17  -1  -2 80.5922 7.05801   3
 -17  -1  -2 68.2837 6.94870   2
 -17  -1  -2 75.5704 7.00058   1
  17   1   2 80.1530 7.10848   3
  17   1   2 73.8369 7.01318   1
 -17   1  -2 73.3679 6.96602   2
  19  -1   2 40.2854 4.17891   3
 -19  -1  -2 44.4067 4.01640   2
 -19  -1  -2 43.5397 4.11511   3
 -19  -1  -2 40.0312 4.05143   1
  19   1   2 45.6787 4.10517   1
 -19   1  -2 40.2090 3.98083   2
  19   1   2 38.1013 4.12705   3
  21  -1   2 6.32804 1.41651   3
 -21  -1  -2 10.3174 1.31240   2
 -21  -1  -2 8.20639 1.40775   1
 -21  -1  -2 9.19637 1.35398   3
  21   1   2 11.1966 1.45865   1
 -21   1  -2 7.03566 1.27280   3
  21   1   2 10.9607 1.30418   2
 -21   1  -2 10.3164 1.29807   2
  21   1   2 7.11343 1.41200   3
 -23  -1  -2 2.55152 1.11084   1
 -23  -1  -2 2.19420 0.88088   2
  23  -1   2 1.93993 1.11431   3
 -23  -1  -2 0.00112 0.53624   3
  23  -1   2 1.33314 0.89791   2
 -23   1  -2 0.51083 0.86859   2
 -23   1  -2 2.13908 0.92414   3
  23   1   2 3.25240 0.90782   2
  23   1   2 2.13837 1.17899   3
 -25  -1  -2 17.4250 2.23589   3
  25  -1   2 19.7148 2.52449   3
 -25  -1  -2 20.2937 2.20112   2
  25  -1   2 20.9503 2.18217   2
 -25  -1  -2 18.0835 2.35589   1
 -25   1  -2 18.1014 2.12296   2
  25   1   2 22.0758 2.59150   3
 -27  -1  -2 175.107 15.0247   2
 -27  -1  -2 160.595 15.0749   1
  27  -1   2 144.041 15.2425   3
 -27  -1  -2 170.820 15.1302   3
 -27   1  -2 159.041 15.1450   1
 -27   1  -2 180.528 15.0122   2
  27   1   2 156.943 15.2141   3
 -29  -1  -2 230.246 20.3222   2
 -29  -1  -2 227.323 20.4152   1
  29  -1   2 223.809 20.6170   3
 -29   1  -2 215.009 20.4482   1
  29   1   2 212.166 20.5332   3
 -29   1  -2 230.105 20.2991   2
 -31  -1  -2 126.209 11.5941   2
 -31  -1  -2 124.953 11.6834   1
  31  -1   2 128.150 11.9422   3
 -31   1  -2 122.291 11.7653   1
 -31   1  -2 113.736 11.5391   2
  31   1   2 136.803 11.9170   3
  33  -1   2 87.4467 9.75617   3
 -33  -1  -2 109.409 9.63714   1
 -33  -1  -2 106.422 9.50182   2
 -33   1  -2 95.8731 9.43232   2
  33   1   2 102.797 9.82037   3
 -33   1  -2 110.541 9.73300   1
 -35  -1  -2 6.59138 1.39760   2
  35  -1   2 6.68583 1.77606   3
 -35  -1  -2 6.67992 1.59242   1
 -35   1  -2 6.97461 1.35081   2
  35   1   2 7.09067 1.78354   3
 -35   1  -2 4.59858 1.67025   1
 -37  -1  -2 6.12453 1.39771   2
 -37  -1  -2 5.55523 1.74656   1
  37  -1   2 5.39527 1.82098   3
 -37   1  -2 7.24384 1.86763   1
 -37   1  -2 8.50297 1.46333   2
 -39  -1  -2 4.48132 1.68503   1
 -39  -1  -2 5.45134 1.35994   2
  39  -1   2 5.84632 1.93727   3
 -39   1  -2 5.70202 1.71203   1
 -39   1  -2 4.30643 1.29043   2
 -41  -1  -2 40.2597 3.93628   2
 -41  -1  -2 34.9351 4.12418   1
 -41   1  -2 34.7020 3.84486   2
 -41   1  -2 34.4992 4.17754   1
 -43  -1  -2 69.5722 6.65103   2
 -43  -1  -2 74.8184 6.94805   1
 -43   1  -2 64.2526 6.87794   1
 -43   1  -2 63.5897 6.56536   2
 -45  -1  -2 27.2844 3.66564   1
 -45  -1  -2 27.0399 3.22033   2
 -45   1  -2 28.1570 3.67561   1
 -45   1  -2 29.1712 3.21703   2
 -47  -1  -2 60.2903 6.28823   1
 -47  -1  -2 61.6729 6.01949   2
 -47   1  -2 57.5328 5.91596   2
 -47   1  -2 58.8482 6.34563   1
 -49  -1  -2 2.41108 1.50000   2
 -49  -1  -2 3.64269 1.95594   1
 -49   1  -2 2.23195 1.85118   1
 -49   1  -2 2.42513 1.35852   2
 -51  -1  -2 38.1338 4.05847   2
 -51  -1  -2 32.0245 4.36914   1
 -51   1  -2 32.1885 3.87079   2
 -51   1  -2 38.2341 4.47715   1
 -53  -1  -2 0.92928 1.41278   2
 -53  -1  -2 1.85190 1.95406   1
 -53   1  -2 2.06565 2.07854   1
 -53   1  -2 -0.1138 1.32874   2
 -55  -1  -2 3.58646 1.60785   2
 -55  -1  -2 3.51051 2.21369   1
 -55   1  -2 -1.0499 1.87624   1
 -55   1  -2 1.91443 1.40885   2
 -57  -1  -2 11.5895 2.67782   1
 -57  -1  -2 8.44489 2.01196   2
 -57   1  -2 9.96096 1.98097   2
 -57   1  -2 6.18546 2.47006   1
 -59  -1  -2 2.88677 2.24882   1
 -59  -1  -2 2.26417 1.62908   2
 -59   1  -2 1.81694 1.54277   2
 -59   1  -2 3.90096 2.27958   1
 -61  -1  -2 21.0846 2.85152   2
 -61  -1  -2 20.1317 3.42270   1
 -61   1  -2 14.7396 3.17882   1
 -61   1  -2 15.6732 2.60535   2
 -60  -2   2 -1.2914 1.56661   2
 -60  -2   2 -1.6216 1.92750   1
 -60   2   2 -3.8113 1.71231   1
 -60   2   2 -1.5168 1.19549   2
 -58  -2   2 -0.6727 1.56236   2
 -58  -2   2 1.80019 2.07899   1
 -58   2   2 1.22891 2.03526   1
 -58   2   2 -1.6203 1.17791   2
 -56  -2   2 20.4656 2.84486   2
 -56  -2   2 17.3843 3.17129   1
 -56   2   2 14.1682 3.03469   1
 -56   2   2 19.6308 2.51966   2
 -54  -2   2 2.59265 2.14772   1
 -54  -2   2 7.02030 1.85901   2
 -54   2   2 5.01163 2.21448   1
 -54   2   2 5.51650 1.48900   2
 -52  -2   2 31.5606 3.73533   2
 -52  -2   2 32.7955 4.23210   1
 -52   2   2 34.5242 3.58459   2
 -52   2   2 28.5991 4.14655   1
 -50  -2   2 21.1639 3.09195   1
 -50  -2   2 14.9757 2.51933   2
 -50   2   2 16.4813 2.92236   1
 -50   2   2 18.2290 2.35830   2
 -48  -2   2 4.47298 1.93741   1
 -48  -2   2 2.56195 1.48826   2
 -48   2   2 3.54357 1.20219   2
 -48   2   2 2.93193 1.80508   1
 -46  -2   2 3.33867 1.53067   2
 -46  -2   2 5.34484 1.94179   1
 -46   2   2 3.70264 1.24647   2
 -46   2   2 2.85327 1.73834   1
 -44  -2   2 0.87396 1.59598   1
 -44  -2   2 0.72085 1.30554   2
 -44   2   2 2.70652 1.67814   1
 -44   2   2 0.95253 1.04496   2
 -42  -2   2 32.7715 3.56192   2
 -42  -2   2 32.4666 3.83169   1
 -42   2   2 31.5587 3.85231   1
 -42   2   2 32.2182 3.36045   2
 -40  -2   2 4.66211 1.41418   2
 -40  -2   2 4.61899 1.62305   1
 -40   2   2 5.56058 1.77290   1
 -40   2   2 4.37068 1.15751   2
 -38  -2   2 25.1491 3.22018   1
 -38  -2   2 27.7842 3.09554   2
 -38   2   2 28.3044 3.28767   1
 -38   2   2 26.7383 2.86851   2
 -36  -2   2 28.6703 3.40745   1
 -36  -2   2 27.4282 3.11994   2
 -36   2   2 30.1324 3.52077   1
 -36   2   2 28.6867 2.97654   2
 -34  -2   2 20.8077 2.47479   2
 -34  -2   2 21.6352 2.77435   1
 -34   2   2 21.4459 2.76493   1
 -34   2   2 20.8548 2.31241   2
 -32  -2   2 5.92683 1.30567   2
 -32  -2   2 6.29754 1.49047   1
 -32   2   2 7.52712 1.64766   1
 -32   2   2 6.77655 1.13330   2
 -30  -2   2 6.87982 1.44689   1
 -30  -2   2 7.42624 1.31564   2
 -30  -2   2 5.56626 1.24090   3
 -30   2   2 5.01451 1.49368   1
 -30   2   2 6.94420 1.07097   2
 -28  -2   2 36.8919 3.89440   3
 -28  -2   2 39.7496 3.94575   1
 -28  -2   2 37.5745 3.77218   2
 -28   2   2 36.2272 3.63209   2
 -28   2   2 39.4553 4.00427   1
 -26  -2   2 13.9509 1.70057   2
 -26  -2   2 12.8609 1.86633   1
 -26   2   2 11.7784 1.50288   2
 -26   2   2 13.1514 1.91868   1
 -24  -2   2 323.448 29.2697   2
 -24  -2   2 306.781 29.3444   1
 -24  -2   2 346.725 29.4079   3
 -24   2   2 317.024 29.1644   2
 -22  -2   2 245.107 21.3791   3
 -22  -2   2 209.785 21.3084   1
 -22  -2   2 239.139 21.2830   2
 -22   2   2 242.370 21.1723   2
 -20  -2   2 58.5056 6.29390   1
 -20  -2   2 75.9811 6.35927   3
 -20  -2   2 69.6125 6.26086   2
  20   2  -2 60.7091 6.19264   2
  20   2  -2 73.3157 6.35701   1
 -20   2   2 62.2401 6.11430   2
 -18  -2   2 24.2187 2.78241   2
 -18  -2   2 27.2892 2.93346   1
 -18  -2   2 31.7243 2.93686   3
 -18   2   2 29.3516 2.87683   3
  18   2  -2 25.0851 2.75310   2
 -18   2   2 27.3197 2.68793   2
  18   2  -2 30.8525 2.96041   1
 -16  -2   2 2.58666 0.95413   1
 -16  -2   2 2.44758 0.80409   2
  16   2  -2 1.63725 0.88779   1
 -16   2   2 1.88333 0.54976   2
 -16   2   2 1.95993 0.72703   3
 -14  -2   2 85.7679 8.02884   1
 -14  -2   2 86.0376 7.96827   2
 -14   2   2 83.3378 7.98869   3
  14   2  -2 93.2589 8.02698   1
 -14   2   2 84.4873 7.84059   2
 -12  -2   2 0.57083 0.65416   2
 -12  -2   2 0.81978 0.80352   1
  12   2  -2 0.35314 0.77407   1
 -12   2   2 0.44450 0.45953   2
 -12   2   2 0.27490 0.52963   3
  12   2  -2 -0.1055 0.31775   2
 -10  -2   2 96.5593 9.61796   1
 -10  -2   2 98.5811 9.58477   2
 -10   2   2 112.797 9.59931   3
  10   2  -2 110.357 9.65131   1
  -8  -2   2 121.505 11.5113   2
  -8  -2   2 113.209 11.5577   1
   8   2  -2 137.511 11.6020   1
  -8   2   2 133.698 11.5072   3
  -6  -2   2 71.0774 6.60780   2
  -6  -2   2 66.8405 6.66637   1
  -6   2   2 73.0326 6.50189   2
   6   2  -2 75.6790 6.69583   1
  -4  -2   2 7.79989 1.11385   2
  -4  -2   2 7.12706 1.21696   1
  -4   2   2 9.01916 0.87445   2
   4   2  -2 5.93630 1.03105   2
   2  -2  -2 7.27555 0.90159   2
  -2  -2   2 7.43355 1.11038   2
  -2  -2   2 6.81356 1.24288   1
   2   2  -2 7.42982 1.04167   2
   2   2  -2 7.73156 1.23803   1
  -2   2   2 7.63519 0.85946   2
  -2   2   2 6.54805 0.99367   1
   0  -2   2 1.72638 1.05192   1
   0  -2   2 3.19863 0.82898   2
   0  -2  -2 2.23915 0.60288   2
   0  -2  -2 3.22615 0.81606   1
   0   2  -2 3.57038 0.77404   2
   0   2  -2 2.91598 1.00382   1
   0   2   2 2.50900 0.51322   2
   0   2   2 1.87545 0.72680   1
   0   2   2 2.61995 0.62458   3
  -2  -2  -2 5.18112 0.77441   2
  -2  -2  -2 4.59946 0.85536   3
  -2   2  -2 4.70586 0.85126   2
   2   2   2 6.65030 0.74123   2
   2   2   2 5.72985 0.70348   3
  -4  -2  -2 8.96029 1.15063   1
  -4  -2  -2 8.54361 1.11679   3
   4  -2   2 9.02278 1.13706   3
  -4  -2  -2 10.0591 1.09223   2
   4   2   2 9.19712 1.13068   1
   4   2   2 8.41282 1.00219   3
  -4   2  -2 9.23776 1.23052   3
  -4   2  -2 9.66181 1.33361   1
   4   2   2 10.7604 1.06776   2
  -6  -2  -2 78.3717 6.79371   2
  -6  -2  -2 74.2688 6.80962   1
  -6  -2  -2 74.6764 6.79811   3
   6  -2   2 67.9234 6.81711   3
   6   2   2 71.0809 6.75681   3
  -6   2  -2 70.4621 6.82239   3
   6   2   2 77.4345 6.78773   1
   6   2   2 80.6374 6.78448   2
  -8  -2  -2 134.095 11.5108   1
  -8  -2  -2 123.879 11.4966   3
  -8  -2  -2 123.517 11.4820   2
   8  -2   2 125.288 11.5435   3
  -8   2  -2 129.333 11.5400   3
   8   2   2 133.281 11.4902   1
   8   2   2 121.785 11.4717   2
   8   2   2 122.361 11.4776   3
  10  -2   2 113.796 10.2595   3
 -10  -2  -2 110.429 10.1826   2
 -10  -2  -2 105.650 10.1801   1
 -10  -2  -2 117.657 10.2205   3
  10   2   2 116.226 10.1861   1
  10   2   2 108.401 10.1899   3
  10   2   2 113.209 10.1760   2
 -10   2  -2 108.963 10.2388   3
 -12  -2  -2 1.57725 0.73391   1
 -12  -2  -2 0.26223 0.58929   3
  12  -2   2 0.51241 0.71884   3
 -12  -2  -2 0.63551 0.65771   2
  12   2   2 0.15951 0.59261   2
  12   2   2 0.48458 0.62732   1
 -12   2  -2 0.81521 0.66371   3
  12   2   2 0.38165 0.56234   3
 -14  -2  -2 83.3448 7.88614   2
 -14  -2  -2 87.7145 7.93075   3
 -14  -2  -2 82.9495 7.89857   1
  14  -2   2 82.1250 8.00273   3
 -14   2  -2 93.9337 7.97794   3
  14   2   2 88.4457 7.94914   3
  14   2   2 83.6306 7.88637   1
  14   2   2 81.8226 7.87514   2
  16  -2   2 0.41597 0.79049   3
 -16  -2  -2 1.70104 0.73940   3
 -16  -2  -2 2.16301 0.80277   1
 -16  -2  -2 2.03768 0.74624   2
  16   2   2 1.56550 0.78446   3
  16   2   2 2.47302 0.85958   1
 -16   2  -2 1.95839 0.77977   3
 -18  -2  -2 31.6264 2.99390   3
 -18  -2  -2 28.1820 2.92131   1
  18  -2   2 26.4773 3.01362   3
 -18  -2  -2 26.9269 2.86457   2
  18   2   2 29.6923 2.91244   1
 -18   2  -2 27.0770 2.86335   2
  18   2   2 29.4911 3.01858   3
 -18   2  -2 28.9609 2.97622   3
 -20  -2  -2 73.6104 6.66705   1
 -20  -2  -2 70.8053 6.61932   2
 -20  -2  -2 71.7643 6.67965   3
  20   2   2 70.9058 6.64779   1
 -20   2  -2 72.6017 6.60300   2
  20   2   2 64.0770 6.69714   3
 -22  -2  -2 228.545 21.5365   2
 -22  -2  -2 248.626 21.5951   1
 -22  -2  -2 257.400 21.6511   3
  22  -2   2 226.336 21.7134   3
 -22   2  -2 237.752 21.5165   2
  22   2   2 221.435 21.5587   1
  22   2   2 241.630 21.7010   3
  24  -2   2 308.798 30.3342   3
 -24  -2  -2 307.281 30.1707   1
 -24  -2  -2 330.181 30.1552   2
 -24  -2  -2 341.006 30.2525   3
  24   2   2 382.223 30.3756   3
 -24   2  -2 331.190 30.1125   2
 -26  -2  -2 12.4147 1.74129   1
  26  -2   2 10.3747 1.90822   3
 -26  -2  -2 13.2166 1.70092   2
  26   2   2 12.6087 1.85817   3
 -26   2  -2 11.6084 1.57256   2
 -28  -2  -2 42.5396 4.05958   3
 -28  -2  -2 38.7849 3.94256   2
  28  -2   2 41.1069 4.29588   3
 -28  -2  -2 37.5096 4.00050   1
 -28   2  -2 37.3577 3.87464   2
  28   2   2 38.4489 4.16583   3
 -30  -2  -2 7.69510 1.48720   1
 -30  -2  -2 6.99324 1.33206   3
  30  -2   2 6.07265 1.64589   3
 -30  -2  -2 8.50112 1.38361   2
 -30   2  -2 6.47215 1.25582   2
  30   2   2 6.22955 1.54655   3
 -32  -2  -2 7.39484 1.35438   2
 -32  -2  -2 7.68848 1.52256   1
  32  -2   2 4.58259 1.62428   3
 -32   2  -2 7.52955 1.30530   2
 -34  -2  -2 22.6800 2.55270   2
  34  -2   2 21.6676 2.93623   3
 -34  -2  -2 18.7215 2.60546   1
 -34   2  -2 20.3685 2.39551   2
  36  -2   2 25.2879 3.44643   3
 -36  -2  -2 27.8795 3.24185   1
 -36  -2  -2 29.0329 3.08808   2
 -36   2  -2 26.1828 2.93155   2
 -36   2  -2 25.2552 3.33042   1
 -38  -2  -2 29.9239 3.31727   1
 -38  -2  -2 26.1034 3.14536   2
  38  -2   2 26.3718 3.69198   3
 -38   2  -2 28.9386 3.47184   1
 -38   2  -2 27.6335 3.03895   2
 -40  -2  -2 4.37990 1.62142   1
 -40  -2  -2 5.97213 1.50467   2
 -40   2  -2 4.93142 1.31913   2
 -40   2  -2 4.79719 1.84729   1
 -42  -2  -2 32.7667 3.97979   1
 -42  -2  -2 35.9090 3.85631   2
 -42   2  -2 34.8689 3.70519   2
 -42   2  -2 35.5481 4.22645   1
 -44  -2  -2 4.01846 1.73613   1
 -44  -2  -2 1.55745 1.38987   2
 -44   2  -2 1.57964 1.23394   2
 -44   2  -2 1.33039 1.72943   1
 -46  -2  -2 3.34566 1.77517   1
 -46  -2  -2 3.80442 1.48390   2
 -46   2  -2 4.26501 1.38331   2
 -46   2  -2 -0.8693 1.63436   1
 -48  -2  -2 1.11462 1.72242   1
 -48  -2  -2 2.01886 1.52807   2
 -48   2  -2 3.12568 1.32071   2
 -48   2  -2 0.70120 1.79848   1
 -50  -2  -2 20.0652 2.99030   1
 -50  -2  -2 16.9175 2.50283   2
 -50   2  -2 13.3456 2.87658   1
 -50   2  -2 15.2306 2.35260   2
 -52  -2  -2 33.1166 4.01793   1
 -52  -2  -2 24.1599 3.44014   2
 -52   2  -2 27.2377 3.84796   1
 -52   2  -2 29.1941 3.27826   2
 -54  -2  -2 5.16701 1.74102   2
 -54  -2  -2 1.25220 1.93589   1
 -54   2  -2 2.83668 1.47517   2
 -54   2  -2 1.65311 1.97120   1
 -56  -2  -2 16.9268 2.70684   2
 -56  -2  -2 17.7545 3.20496   1
 -56   2  -2 17.3619 3.04825   1
 -56   2  -2 16.3979 2.43726   2
 -58  -2  -2 -0.8966 1.49215   2
 -58  -2  -2 0.94031 2.14056   1
 -58   2  -2 -1.3568 1.27754   2
 -58   2  -2 -1.0580 1.87961   1
 -60  -2  -2 0.38649 1.74176   2
 -60  -2  -2 -2.0874 2.06583   1
 -60   2  -2 -0.4568 1.32586   2
 -60   2  -2 0.33296 2.03757   1
 -59  -3   2 -0.6571 1.70127   2
 -59  -3   2 0.93517 2.16132   1
 -59   3   2 0.70664 2.02556   1
 -57  -3   2 2.32198 2.13530   1
 -57  -3   2 1.69690 1.82260   2
 -57   3   2 2.96547 1.27921   2
 -57   3   2 2.68744 2.16972   1
 -55  -3   2 -1.5096 1.60772   2
 -55  -3   2 -3.0577 1.91361   1
 -55   3   2 0.82684 1.19863   2
 -55   3   2 0.09340 1.90694   1
 -53  -3   2 -0.4895 1.47669   2
 -53  -3   2 1.87636 1.92899   1
 -53   3   2 0.61629 1.87322   1
 -53   3   2 0.20886 1.11626   2
 -51  -3   2 14.5951 2.73767   1
 -51  -3   2 12.5180 2.37431   2
 -51   3   2 14.2028 1.97215   2
 -51   3   2 12.7585 2.62359   1
 -49  -3   2 2.92921 1.92525   1
 -49  -3   2 0.36027 1.52480   2
 -49   3   2 0.54880 1.10412   2
 -49   3   2 1.18201 1.85280   1
 -47  -3   2 36.7531 4.59483   1
 -47  -3   2 36.5603 4.24264   2
 -47   3   2 40.3413 4.01970   2
 -47   3   2 40.5399 4.53661   1
 -45  -3   2 9.58370 2.30664   1
 -45  -3   2 12.2534 2.10194   2
 -45   3   2 10.5840 1.66871   2
 -45   3   2 11.1867 2.35852   1
 -43  -3   2 21.5938 2.69848   2
 -43  -3   2 17.3577 2.82448   1
 -43   3   2 17.9378 2.79920   1
 -43   3   2 18.4860 2.26247   2
 -41  -3   2 3.06140 1.65541   1
 -41  -3   2 4.71775 1.44994   2
 -41   3   2 1.41397 1.62474   1
 -41   3   2 1.29076 1.02258   2
 -39  -3   2 0.31647 1.20047   2
 -39  -3   2 -0.5166 1.35805   1
 -39   3   2 0.75380 1.51260   1
 -39   3   2 -0.3790 0.87467   2
 -37  -3   2 1.08924 1.48507   1
 -37  -3   2 2.86460 1.29271   2
 -37   3   2 1.44166 0.89092   2
 -37   3   2 4.56947 1.61000   1
 -35  -3   2 -1.6636 1.27449   1
 -35  -3   2 0.56883 1.08994   2
 -35   3   2 0.10753 1.34655   1
 -35   3   2 0.21500 0.80745   2
 -33  -3   2 77.3975 7.32578   3
 -33  -3   2 74.2679 7.20730   2
 -33  -3   2 73.0605 7.37416   1
 -33   3   2 77.8267 7.03225   2
 -33   3   2 71.0743 7.33449   1
 -31  -3   2 38.4425 3.93488   2
 -31  -3   2 35.9574 3.99952   1
 -31  -3   2 35.8708 3.98442   3
 -31   3   2 39.8814 3.70152   2
 -29  -3   2 86.9017 8.38289   1
 -29  -3   2 90.0737 8.31055   2
 -29   3   2 86.6930 8.09593   2
 -27  -3   2 33.2894 3.89361   1
 -27  -3   2 41.2746 3.79514   2
 -27  -3   2 35.9497 3.79114   3
 -27   3   2 36.8704 3.56160   2
 -25  -3   2 0.66447 1.02535   1
 -25  -3   2 0.07228 0.80662   2
 -25  -3   2 -0.4587 0.69816   3
 -25   3   2 0.63952 0.64004   2
 -23  -3   2 0.57119 1.06318   1
 -23  -3   2 -0.4234 0.70804   3
 -23  -3   2 0.40156 0.81252   2
 -23   3   2 1.18966 0.60708   2
 -21  -3   2 0.40596 0.74933   3
 -21  -3   2 1.92367 1.09753   1
 -21  -3   2 1.74337 0.90624   2
 -21   3   2 1.55921 0.64969   2
 -19  -3   2 31.0065 3.07344   1
 -19  -3   2 25.6961 2.93971   2
 -19  -3   2 31.8574 3.00813   3
 -19   3   2 26.1171 2.76129   2
 -17  -3   2 23.1782 2.46396   2
 -17  -3   2 21.3893 2.55431   1
 -17  -3   2 21.7279 2.42166   3
  17   3  -2 28.2957 2.60263   1
 -17   3   2 21.5583 2.42856   3
 -17   3   2 23.2821 2.28113   2
 -15  -3   2 22.9934 2.59132   2
 -15  -3   2 25.1166 2.71469   1
  15   3  -2 26.3906 2.69028   1
 -15   3   2 24.2765 2.55446   3
 -13  -3   2 45.0302 4.19067   2
 -13  -3   2 39.7572 4.27361   1
  13   3  -2 44.7958 4.25052   1
 -13   3   2 42.0405 4.09666   3
 -11  -3   2 50.9337 5.15992   1
 -11  -3   2 49.8733 5.07040   2
  11   3  -2 53.9106 5.05939   2
  11   3  -2 55.9840 5.20435   1
 -11   3   2 55.8896 5.02658   3
  -9  -3   2 25.4529 2.93126   1
  -9  -3   2 27.6459 2.88840   2
   9   3  -2 32.8505 3.01296   1
  -9   3   2 29.4031 2.73781   3
  -9   3   2 27.2054 2.68033   2
   9   3  -2 26.6212 2.80731   2
  -7  -3   2 24.0352 2.64069   2
  -7  -3   2 21.3251 2.68280   1
  -7   3   2 25.7102 2.45988   2
   7   3  -2 27.1634 2.75535   1
  -7   3   2 26.6109 2.47063   3
   7   3  -2 26.8431 2.58967   2
  -5  -3   2 151.528 14.9051   1
  -5  -3   2 147.711 14.8194   2
  -5   3   2 167.881 14.7078   3
  -5   3   2 157.966 14.7096   2
   5   3  -2 182.514 14.9512   1
   5   3  -2 172.158 14.8219   2
  -5   3   2 162.330 14.8027   1
  -3  -3   2 95.6078 8.59930   2
   3  -3  -2 87.6489 8.48624   2
  -3  -3   2 93.5210 8.69209   1
  -3   3   2 98.9658 8.57207   1
  -3   3   2 89.5867 8.39939   3
   3   3  -2 96.5111 8.68488   1
  -3   3   2 89.7479 8.44940   2
   3   3  -2 95.8038 8.55227   2
   1  -3  -2 77.5619 7.47529   2
  -1  -3   2 81.3322 7.58287   2
  -1  -3   2 83.0633 7.71132   1
   1  -3  -2 92.2518 7.59144   1
  -1   3   2 81.4169 7.54504   1
  -1   3   2 80.4589 7.43216   2
   1   3  -2 82.7882 7.65873   1
   1   3  -2 75.7795 7.50087   2
   1  -3   2 94.2885 7.79912   1
  -1  -3  -2 82.4801 7.62017   1
   1  -3   2 81.6649 7.52539   3
  -1  -3  -2 87.8218 7.54441   2
   1   3   2 77.1870 7.47847   2
   1   3   2 82.6187 7.59632   1
  -1   3  -2 74.2026 7.53520   2
  -1   3  -2 80.4306 7.67660   1
   3  -3   2 84.5395 8.30608   3
  -3  -3  -2 88.9643 8.34016   2
  -3  -3  -2 95.6326 8.44370   1
  -3  -3  -2 98.0319 8.32908   3
   3  -3   2 92.5389 8.53195   1
  -3   3  -2 90.3426 8.35869   2
  -3   3  -2 88.4690 8.48156   1
   3   3   2 90.3855 8.30380   2
   3   3   2 91.6710 8.39633   1
  -5  -3  -2 155.168 14.7840   3
   5  -3   2 156.507 14.7992   3
  -5  -3  -2 171.352 14.8370   2
  -5  -3  -2 166.737 14.8913   1
   5   3   2 155.873 14.7145   3
  -5   3  -2 166.174 14.8284   3
  -5   3  -2 175.167 14.9738   1
  -5   3  -2 160.713 14.8313   2
   5   3   2 167.449 14.8646   1
   5   3   2 165.374 14.7939   2
  -7  -3  -2 28.2715 2.66613   1
  -7  -3  -2 23.8408 2.45715   3
  -7  -3  -2 24.1536 2.54676   2
   7  -3   2 22.8729 2.51470   3
  -7   3  -2 30.9611 2.81536   1
   7   3   2 26.6909 2.58139   1
  -7   3  -2 26.1500 2.55586   3
   7   3   2 24.6944 2.39393   3
   7   3   2 24.8369 2.45704   2
   9  -3   2 29.3070 2.83429   3
  -9  -3  -2 28.7281 2.85615   1
  -9  -3  -2 28.0447 2.80955   2
  -9  -3  -2 25.2739 2.73977   3
  -9   3  -2 29.1141 2.84913   3
   9   3   2 30.0729 2.81564   1
   9   3   2 31.0431 2.78538   2
   9   3   2 26.7320 2.69951   3
 -11  -3  -2 49.2322 4.82843   2
 -11  -3  -2 51.3140 4.82347   3
  11  -3   2 50.0908 4.87872   3
 -11  -3  -2 44.6918 4.82603   1
  11   3   2 55.0455 4.80936   2
 -11   3  -2 55.6814 4.88432   3
  11   3   2 56.4048 4.85238   1
  11   3   2 46.9662 4.76224   3
 -13  -3  -2 45.9753 4.18772   1
 -13  -3  -2 36.8188 4.08982   2
 -13  -3  -2 46.5587 4.15021   3
  13  -3   2 42.6417 4.21536   3
  13   3   2 42.4824 4.09449   3
  13   3   2 42.2325 4.10849   1
 -13   3  -2 45.1231 4.18949   3
  13   3   2 40.1312 4.07356   2
 -15  -3  -2 26.9310 2.70472   1
  15  -3   2 26.6148 2.76373   3
 -15  -3  -2 26.0113 2.65517   3
 -15  -3  -2 22.4201 2.64169   2
  15   3   2 25.0659 2.64277   1
 -15   3  -2 27.7735 2.71901   3
  15   3   2 23.6379 2.60279   3
  15   3   2 24.3114 2.61406   2
 -17  -3  -2 23.5270 2.72629   1
  17  -3   2 29.0398 2.98445   3
 -17  -3  -2 28.7704 2.80183   3
 -17  -3  -2 24.7367 2.73071   2
 -17   3  -2 25.9949 2.77792   3
  17   3   2 25.2380 2.73507   1
  17   3   2 26.2743 2.76564   3
  19  -3   2 29.1383 3.22744   3
 -19  -3  -2 31.5035 3.13692   1
 -19  -3  -2 28.6404 3.07121   2
 -19  -3  -2 30.8829 3.11523   3
  19   3   2 32.0390 3.13396   1
  19   3   2 28.2881 3.11761   3
 -21  -3  -2 2.24345 1.02543   1
  21  -3   2 -0.7658 0.98413   3
 -21  -3  -2 1.19465 0.81462   3
 -21  -3  -2 1.08703 0.85763   2
  21   3   2 0.88720 0.88586   3
  21   3   2 1.70541 1.01078   1
 -23  -3  -2 -0.1603 0.71978   3
 -23  -3  -2 -0.1533 0.90645   1
 -23  -3  -2 0.61435 0.83116   2
  23  -3   2 0.31998 1.04422   3
 -23   3  -2 1.36924 0.86557   2
 -25  -3  -2 -0.4633 0.72636   3
  25  -3   2 -0.0515 1.16997   3
 -25  -3  -2 0.11730 1.01451   1
 -25  -3  -2 1.09255 0.91321   2
 -25   3  -2 0.47459 0.84791   2
  27  -3   2 37.0336 4.10711   3
 -27  -3  -2 37.0315 3.81506   3
 -27  -3  -2 34.9220 3.77522   1
 -27  -3  -2 37.0852 3.77595   2
 -27   3  -2 37.0438 3.68276   2
  29  -3   2 74.6910 8.24787   3
 -29  -3  -2 83.6793 7.94346   2
 -29  -3  -2 96.2765 8.05512   1
 -29   3  -2 82.9451 7.84886   2
 -31  -3  -2 41.6151 4.22564   3
 -31  -3  -2 37.3096 4.10904   2
 -31  -3  -2 39.8134 4.23946   1
  31  -3   2 43.0895 4.61918   3
 -31   3  -2 39.9002 4.00059   2
 -33  -3  -2 69.7056 7.09732   2
 -33  -3  -2 82.6522 7.29629   3
 -33  -3  -2 80.0818 7.25188   1
  33  -3   2 64.2146 7.44780   3
 -33   3  -2 73.3667 6.99522   2
  35  -3   2 -2.0660 1.42295   3
 -35  -3  -2 0.02956 1.26963   1
 -35  -3  -2 0.34046 1.13615   2
 -35   3  -2 0.99148 0.95746   2
  37  -3   2 0.94169 1.62576   3
 -37  -3  -2 1.85702 1.39986   1
 -37  -3  -2 1.06293 1.22363   2
 -37   3  -2 2.59708 1.06814   2
 -39  -3  -2 0.77362 1.22252   2
 -39  -3  -2 -0.0627 1.35684   1
 -39   3  -2 1.43104 1.08712   2
 -41  -3  -2 3.28641 1.67404   1
 -41  -3  -2 2.73476 1.38523   2
 -41   3  -2 2.82020 1.20257   2
 -43  -3  -2 17.1504 2.48304   2
 -43  -3  -2 17.5011 2.71101   1
 -43   3  -2 16.7102 2.26849   2
 -43   3  -2 16.0046 2.72224   1
 -45  -3  -2 14.2263 2.22941   2
 -45  -3  -2 8.02543 2.21338   1
 -45   3  -2 11.0690 2.44757   1
 -45   3  -2 12.5415 1.92875   2
 -47  -3  -2 37.8279 4.48877   1
 -47  -3  -2 39.8315 4.30411   2
 -47   3  -2 36.2476 4.07842   2
 -47   3  -2 41.7085 4.67980   1
 -49  -3  -2 2.09533 1.95896   1
 -49  -3  -2 0.01688 1.51330   2
 -49   3  -2 0.08182 1.77507   1
 -49   3  -2 1.22144 1.29155   2
 -51  -3  -2 11.3905 2.34038   2
 -51  -3  -2 12.5562 2.71315   1
 -51   3  -2 16.2822 2.12406   2
 -51   3  -2 12.0134 2.59758   1
 -53  -3  -2 0.77201 1.94115   1
 -53  -3  -2 1.20098 1.58639   2
 -53   3  -2 0.22755 1.90458   1
 -53   3  -2 -1.1752 1.20351   2
 -55  -3  -2 -0.9961 2.00832   1
 -55  -3  -2 -0.5686 1.63485   2
 -55   3  -2 -2.5388 1.15952   2
 -55   3  -2 -2.4091 1.84184   1
 -57  -3  -2 1.41154 1.78252   2
 -57  -3  -2 1.57742 2.11372   1
 -57   3  -2 2.03591 2.00936   1
 -57   3  -2 -2.2913 1.18781   2
 -59  -3  -2 0.39682 2.03900   1
 -59  -3  -2 0.41456 1.65108   2
 -59   3  -2 -0.1514 1.92320   1
 -59   3  -2 -0.0867 1.35570   2
 -58  -4   2 1.13331 1.90185   2
 -58  -4   2 2.64217 2.24844   1
 -58   4   2 -0.5565 1.89635   1
 -56  -4   2 5.62043 2.07521   2
 -56  -4   2 5.81025 2.30334   1
 -56   4   2 5.06810 2.24418   1
 -54  -4   2 1.43585 1.69131   2
 -54  -4   2 1.75005 2.17857   1
 -54   4   2 3.55134 2.04104   1
 -52  -4   2 4.73380 1.88384   2
 -52  -4   2 4.87452 2.18592   1
 -52   4   2 -0.4153 1.89198   1
 -52   4   2 3.40109 1.24708   2
 -50  -4   2 1.77765 1.59012   2
 -50  -4   2 2.45252 1.97431   1
 -50   4   2 3.10767 1.16833   2
 -50   4   2 2.74975 1.96271   1
 -48  -4   2 0.34280 1.51182   2
 -48  -4   2 -0.1203 1.73023   1
 -48   4   2 0.23374 1.03775   2
 -48   4   2 1.46146 1.76742   1
 -46  -4   2 0.58576 1.57182   2
 -46  -4   2 0.41810 1.67933   1
 -46   4   2 -0.1143 0.98712   2
 -46   4   2 1.11890 1.75077   1
 -44  -4   2 2.70785 1.62755   2
 -44  -4   2 3.15533 1.80167   1
 -44   4   2 2.96042 1.11613   2
 -44   4   2 3.28467 1.87217   1
 -42  -4   2 14.4175 2.38218   2
 -42  -4   2 14.5187 2.66764   1
 -42   4   2 17.3222 2.70170   1
 -42   4   2 14.7333 1.91918   2
 -40  -4   2 1.92325 1.67446   1
 -40  -4   2 3.46153 1.53935   2
 -40   4   2 4.21955 1.77788   1
 -40   4   2 2.36287 1.02446   2
 -38  -4   2 2.27939 1.60217   1
 -38  -4   2 0.28426 1.29737   2
 -38   4   2 -0.0875 0.86528   2
 -36  -4   2 0.51074 1.31466   2
 -36  -4   2 1.69302 1.45627   1
 -36   4   2 1.79640 0.89770   2
 -34  -4   2 4.05179 1.42476   2
 -34  -4   2 4.35236 1.60116   1
 -34  -4   2 -0.3917 1.18382   3
 -34   4   2 4.24205 0.94154   2
 -32  -4   2 -0.6686 0.73687   3
 -32  -4   2 0.14852 1.35812   1
 -32  -4   2 0.34889 1.17285   2
 -32   4   2 2.25454 0.80266   2
 -30  -4   2 9.65201 1.73184   2
 -30  -4   2 9.15003 1.82332   1
 -30   4   2 10.0513 1.34875   2
 -28  -4   2 31.6419 3.41403   3
 -28  -4   2 31.2793 3.49244   2
 -28  -4   2 32.3307 3.59836   1
 -28   4   2 32.2299 3.13943   2
 -26  -4   2 1.16385 1.02797   2
 -26  -4   2 2.64458 1.31255   1
 -26  -4   2 -0.9885 0.84515   3
 -26   4   2 1.97498 0.73053   2
 -24  -4   2 100.605 9.19715   1
 -24  -4   2 100.110 9.10487   3
 -24  -4   2 89.9586 9.07232   2
 -24   4   2 96.2795 8.87827   2
 -22  -4   2 51.9605 5.49400   1
 -22  -4   2 57.4354 5.46277   2
 -22  -4   2 61.9304 5.45143   3
 -22   4   2 51.3240 5.20070   2
 -20  -4   2 22.1315 2.48459   3
 -20  -4   2 24.1306 2.56746   2
 -20  -4   2 21.4796 2.65700   1
 -18  -4   2 11.1047 1.68747   2
 -18  -4   2 13.1014 1.86417   1
 -18  -4   2 12.1550 1.59360   3
 -16  -4   2 3.82604 1.07348   2
 -16  -4   2 3.08450 0.81677   3
 -16  -4   2 3.77811 1.21031   1
 -14  -4   2 14.1016 1.95840   1
 -14  -4   2 12.7391 1.58558   3
 -14  -4   2 12.8772 1.79168   2
 -14   4   2 15.1304 1.51805   2
 -14   4   2 13.3650 1.63993   3
 -12  -4   2 0.46981 1.00261   2
 -12  -4   2 0.89704 1.14519   1
 -12   4   2 0.76347 0.65892   3
  12   4  -2 1.32719 1.29744   1
 -12   4   2 2.46468 0.66984   2
 -10  -4   2 263.743 26.8408   2
 -10  -4   2 293.303 26.9522   1
 -10   4   2 289.761 26.7127   2
 -10   4   2 306.975 26.7534   3
  10   4  -2 330.967 26.9833   1
  -8  -4   2 171.806 16.3482   1
  -8  -4   2 166.999 16.2498   2
   8   4  -2 167.744 16.1955   2
  -8   4   2 193.024 16.2547   1
   8   4  -2 205.276 16.4054   1
  -8   4   2 173.305 16.0894   3
  -8   4   2 173.114 16.0955   2
  -6  -4   2 119.104 10.7475   1
  -6  -4   2 110.505 10.5950   2
  -6   4   2 115.193 10.5791   1
   6   4  -2 115.415 10.5460   2
  -6   4   2 113.864 10.4343   2
   6   4  -2 120.019 10.6977   1
  -6   4   2 111.557 10.3808   3
   4  -4  -2 122.367 11.9050   2
  -4  -4   2 116.802 11.9716   2
  -4  -4   2 138.372 12.1500   1
   4   4  -2 127.325 11.9310   2
  -4   4   2 128.528 11.8448   2
  -4   4   2 144.683 12.0280   1
   4   4  -2 139.099 12.1066   1
   2  -4  -2 0.22224 0.86693   2
  -2  -4   2 -0.6066 1.19745   1
  -2  -4   2 0.93565 1.11826   2
   2   4  -2 2.07877 1.17807   1
   2   4  -2 0.55740 0.70492   2
  -2   4   2 0.94089 0.93082   1
  -2   4   2 1.02977 0.66042   2
   0  -4  -2 5.94496 1.31100   1
   0  -4   2 4.41923 0.77375   3
   0  -4   2 3.24513 1.39804   1
   0  -4  -2 2.31521 1.02119   2
   0  -4   2 3.26316 1.27490   2
   0   4  -2 4.76609 0.93696   2
   0   4  -2 4.23880 1.36639   1
   0   4   2 4.18256 0.84733   2
   0   4   2 6.92791 1.20176   1
  -2  -4  -2 -0.3526 0.86632   2
   2  -4   2 0.40624 1.27484   1
   2  -4   2 0.89525 0.52933   3
  -2  -4  -2 0.41271 1.15880   1
  -2   4  -2 2.15588 0.74927   2
   2   4   2 0.58601 0.90437   1
  -2   4  -2 -0.0464 1.14696   1
   2   4   2 0.21801 0.65646   2
  -4  -4  -2 113.184 11.7169   2
  -4  -4  -2 148.070 11.8905   1
   4  -4   2 119.960 11.6337   3
   4   4   2 141.811 11.8258   1
  -4   4  -2 125.841 11.7234   2
  -4   4  -2 130.687 11.8976   1
   4   4   2 126.099 11.6856   2
  -6  -4  -2 121.479 10.1921   1
   6  -4   2 104.426 9.98492   3
  -6  -4  -2 107.264 9.97127   3
  -6  -4  -2 95.9673 10.0404   2
  -6   4  -2 101.223 10.0285   2
   6   4   2 111.689 10.0121   2
   6   4   2 124.016 10.1515   1
  -6   4  -2 116.966 10.2343   1
  -8  -4  -2 152.932 16.0621   2
   8  -4   2 199.758 16.0860   3
  -8  -4  -2 176.677 16.0160   3
  -8  -4  -2 174.045 16.1640   1
  -8   4  -2 191.237 16.0801   3
   8   4   2 163.102 16.0219   2
   8   4   2 180.920 16.1298   1
  -8   4  -2 174.267 16.0599   2
  -8   4  -2 174.831 16.2057   1
 -10  -4  -2 290.972 26.4546   1
 -10  -4  -2 296.086 26.4178   2
  10  -4   2 281.020 26.3935   3
 -10  -4  -2 281.260 26.3462   3
  10   4   2 298.877 26.4345   1
 -10   4  -2 308.674 26.4100   3
  10   4   2 281.953 26.3613   2
 -10   4  -2 298.422 26.5200   1
 -12  -4  -2 0.74114 0.66982   3
 -12  -4  -2 1.63885 0.88396   2
 -12  -4  -2 2.06481 1.09932   1
  12  -4   2 0.46725 0.81547   3
 -12   4  -2 1.27368 0.92409   3
  12   4   2 0.29381 0.87898   1
 -14  -4  -2 14.0993 1.85538   1
 -14  -4  -2 14.7662 1.81470   2
  14  -4   2 14.5261 1.83996   3
 -14  -4  -2 11.5965 1.65742   3
 -14   4  -2 15.1651 1.78660   3
  14   4   2 17.8269 1.88387   1
 -16  -4  -2 4.35280 1.08019   2
 -16  -4  -2 5.15059 1.16553   1
 -16  -4  -2 3.21600 0.87130   3
  16  -4   2 2.07319 1.01798   3
  16   4   2 4.63926 1.08385   1
 -18  -4  -2 12.9632 1.82569   1
  18  -4   2 13.8881 1.96422   3
 -18  -4  -2 14.1033 1.78795   2
 -18  -4  -2 12.3864 1.68447   3
  18   4   2 14.3145 1.80069   1
 -20  -4  -2 21.5129 2.56547   1
  20  -4   2 23.6275 2.73768   3
 -20  -4  -2 21.7521 2.43879   3
 -20  -4  -2 22.5784 2.48020   2
  22  -4   2 55.9954 5.81626   3
 -22  -4  -2 59.1467 5.63834   3
 -22  -4  -2 61.7118 5.62580   2
 -22  -4  -2 53.7792 5.60232   1
  24  -4   2 98.4617 9.64296   3
 -24  -4  -2 99.4405 9.45164   1
 -24  -4  -2 103.764 9.47707   3
 -24  -4  -2 100.008 9.42224   2
 -26  -4  -2 2.49096 1.18298   1
 -26  -4  -2 -0.3527 0.90690   3
 -26  -4  -2 1.64100 1.04660   2
  26  -4   2 -1.1001 1.28877   3
 -26   4  -2 2.08148 0.96214   2
  28  -4   2 30.5182 3.87523   3
 -28  -4  -2 32.2125 3.55413   2
 -28  -4  -2 35.4725 3.60865   3
 -28  -4  -2 32.7849 3.58536   1
 -28   4  -2 33.8559 3.42530   2
 -30  -4  -2 9.62410 1.69826   2
 -30  -4  -2 12.1622 1.91287   1
  30  -4   2 7.91203 2.01302   3
 -30   4  -2 10.6718 1.61644   2
  32  -4   2 -1.0011 1.50316   3
 -32  -4  -2 -0.8320 0.80275   3
 -32  -4  -2 -0.2684 1.28347   1
 -32  -4  -2 1.38398 1.15408   2
 -32   4  -2 0.23296 1.00275   2
 -34  -4  -2 2.61648 1.32722   2
  34  -4   2 2.71794 1.74390   3
 -34  -4  -2 4.05046 1.53962   1
 -34  -4  -2 1.83966 1.25710   3
 -34   4  -2 4.19291 1.17926   2
 -36  -4  -2 -0.6121 1.37720   1
  36  -4   2 -0.2388 1.63987   3
 -36  -4  -2 -0.8072 1.21657   2
 -36   4  -2 2.49819 1.11598   2
 -38  -4  -2 1.15751 1.29920   2
 -38  -4  -2 1.95437 1.48793   1
 -38   4  -2 0.38954 1.05385   2
 -40  -4  -2 2.46862 1.57967   1
 -40  -4  -2 3.14011 1.46869   2
 -40   4  -2 2.97255 1.20947   2
 -42  -4  -2 16.8746 2.52805   2
 -42  -4  -2 15.7400 2.71186   1
 -42   4  -2 15.5925 2.15336   2
 -44  -4  -2 2.24413 1.76284   1
 -44  -4  -2 1.88591 1.56309   2
 -44   4  -2 5.36782 1.35868   2
 -46  -4  -2 -0.8313 1.54915   2
 -46  -4  -2 0.27964 1.79041   1
 -46   4  -2 3.15035 1.97321   1
 -46   4  -2 -0.5119 1.17274   2
 -48  -4  -2 -0.4620 1.48171   2
 -48  -4  -2 -1.3710 1.79697   1
 -48   4  -2 0.10658 1.77696   1
 -48   4  -2 1.08168 1.29003   2
 -50  -4  -2 6.45901 1.95077   2
 -50  -4  -2 5.11572 2.21720   1
 -50   4  -2 7.29857 2.20442   1
 -50   4  -2 2.16859 1.39355   2
 -52  -4  -2 2.27617 2.10750   1
 -52  -4  -2 4.45050 1.82575   2
 -52   4  -2 2.79763 2.16883   1
 -52   4  -2 3.77125 1.41279   2
 -54  -4  -2 1.63535 1.77317   2
 -54  -4  -2 0.68128 2.01688   1
 -54   4  -2 1.66507 2.03594   1
 -54   4  -2 0.53909 1.29516   2
 -56  -4  -2 5.06351 2.00688   2
 -56  -4  -2 10.2006 2.62618   1
 -56   4  -2 6.33533 1.58943   2
 -56   4  -2 3.59550 2.15731   1
 -58  -4  -2 2.06305 1.82538   2
 -58  -4  -2 1.71617 2.28252   1
 -58   4  -2 -1.5878 1.22017   2
 -58   4  -2 1.55808 2.05920   1
 -55  -5   2 1.48689 1.98729   2
 -55  -5   2 0.56787 2.03210   1
 -55   5   2 0.49982 1.98712   1
 -53  -5   2 -0.5397 1.85701   1
 -53  -5   2 2.31109 1.77562   2
 -53   5   2 -2.7390 1.67400   1
 -51  -5   2 -2.9484 1.57599   2
 -51  -5   2 0.11848 2.01522   1
 -51   5   2 1.44851 1.98926   1
 -49  -5   2 2.49954 1.95483   1
 -49  -5   2 3.38391 1.90496   2
 -49   5   2 2.63400 1.92662   1
 -47  -5   2 5.16191 1.86251   2
 -47  -5   2 2.98573 2.01886   1
 -47   5   2 0.18589 1.81986   1
 -47   5   2 2.45570 1.52572   2
 -45  -5   2 6.65429 1.97751   2
 -45  -5   2 8.25795 2.19438   1
 -45   5   2 6.04232 1.32171   2
 -45   5   2 8.14431 2.18708   1
 -43  -5   2 5.16988 1.89615   1
 -43  -5   2 8.08370 1.94376   2
 -43   5   2 3.94832 1.16743   2
 -43   5   2 2.88635 1.84855   1
 -41  -5   2 19.9917 3.11173   1
 -41  -5   2 18.2738 2.90358   2
 -41   5   2 22.6280 2.40625   2
 -39  -5   2 2.55424 1.69246   1
 -39  -5   2 3.74744 1.59099   2
 -39   5   2 3.50097 1.03966   2
 -37  -5   2 3.71568 1.69013   1
 -37  -5   2 3.89883 1.60562   2
 -37   5   2 2.13850 0.99791   2
 -35  -5   2 3.72099 1.64911   1
 -35  -5   2 3.58164 1.55353   2
 -35   5   2 3.38708 0.99050   2
 -33  -5   2 12.9508 2.22498   2
 -33  -5   2 13.7573 2.34676   1
 -33   5   2 13.9983 1.69547   2
 -31  -5   2 3.38782 1.44120   3
 -31  -5   2 7.84891 1.77806   1
 -31  -5   2 7.57720 1.66981   2
 -31   5   2 9.11574 1.20131   2
 -29  -5   2 8.13335 1.65301   3
 -29  -5   2 8.99223 1.80378   2
 -29  -5   2 10.6383 2.02096   1
 -29   5   2 11.6918 1.42923   2
 -27  -5   2 22.5105 2.86141   1
 -27  -5   2 20.9766 2.60265   3
 -27  -5   2 22.8741 2.80198   2
 -27   5   2 21.2956 2.31157   2
 -25  -5   2 -0.6266 1.29056   1
 -25  -5   2 -1.5906 0.81960   3
 -25  -5   2 0.82439 1.18875   2
 -25   5   2 0.81292 0.78426   2
 -23  -5   2 13.0595 2.00674   2
 -23  -5   2 15.6224 2.23302   1
 -23  -5   2 13.8887 1.84595   3
 -21  -5   2 4.15420 1.26552   2
 -21  -5   2 5.53081 1.42032   1
 -21  -5   2 1.65466 0.85927   3
 -19  -5   2 4.64013 1.35077   2
 -19  -5   2 6.06365 1.53070   1
 -19  -5   2 5.65408 1.01021   3
 -19   5   2 5.40237 0.95531   2
 -17  -5   2 0.06988 1.20853   1
 -17  -5   2 -0.6134 0.58707   3
 -17  -5   2 0.28860 1.02222   2
 -17   5   2 0.66637 0.64260   2
 -15  -5   2 0.71335 1.00281   2
 -15  -5   2 0.68773 1.19278   1
 -15  -5   2 0.24510 0.57968   3
 -15   5   2 1.17458 0.65214   2
 -13  -5   2 1.71900 0.61561   3
 -13  -5   2 1.76943 1.20970   1
 -13  -5   2 1.27706 1.10405   2
 -13   5   2 0.57800 0.71171   3
 -13   5   2 3.51646 0.72733   2
 -11  -5   2 -0.6848 0.98456   2
 -11  -5   2 0.49550 1.16733   1
 -11  -5   2 -0.0379 0.48437   3
 -11   5   2 1.18462 0.64816   2
 -11   5   2 -0.9286 0.61294   3
  -9  -5   2 6.16939 1.48234   2
  -9  -5   2 11.3834 1.81343   1
  -9   5   2 9.78149 1.45983   1
  -9   5   2 8.87956 1.13093   2
  -9   5   2 6.95665 1.02164   3
  -7  -5   2 15.5198 2.05728   2
  -7  -5   2 15.3113 2.21795   1
  -7   5   2 13.8177 1.63659   2
  -7   5   2 14.4597 1.94227   1
  -5  -5   2 -0.3616 1.06344   2
  -5  -5   2 2.30307 1.28791   1
  -5   5   2 0.52271 0.68352   2
  -5   5   2 1.27288 1.01259   1
  -3  -5   2 1.30202 1.17367   2
  -3  -5   2 1.64463 1.38243   1
   3  -5  -2 0.74773 1.02479   2
  -3   5   2 0.22947 0.70982   2
  -3   5   2 4.51118 1.13936   1
  -1  -5   2 -1.0415 1.08133   2
  -1  -5   2 0.00068 1.35514   1
   1  -5  -2 -0.3100 0.98187   2
  -1   5   2 0.60723 1.00624   1
  -1   5   2 0.45655 0.68649   2
  -1  -5  -2 -0.6266 0.99173   2
  -1  -5  -2 1.40290 1.18163   1
   1  -5   2 1.35590 0.43280   3
   1  -5   2 0.72769 1.36937   1
   1   5   2 1.73741 1.04613   1
   1   5   2 0.95741 0.69822   2
  -3  -5  -2 1.46551 1.26906   1
  -3  -5  -2 -0.9006 0.98281   2
   3  -5   2 1.22586 0.52039   3
   3   5   2 1.80430 1.05994   1
   3   5   2 0.84481 0.72130   2
  -3   5  -2 2.29761 0.98108   2
  -5  -5  -2 0.52790 0.98901   2
   5  -5   2 0.72844 0.56820   3
  -5  -5  -2 2.44425 1.22863   1
   5   5   2 0.50350 0.67877   2
  -5   5  -2 1.00826 0.78118   2
   5   5   2 1.70675 1.11064   1
   7  -5   2 14.7975 1.67337   3
  -7  -5  -2 12.2153 1.83969   2
  -7  -5  -2 20.5517 2.18080   1
  -7  -5  -2 12.6802 1.57826   3
  -7   5  -2 14.6504 1.72950   2
   7   5   2 14.5583 1.93802   1
   9  -5   2 7.30964 1.13254   3
  -9  -5  -2 6.20880 1.53472   1
  -9  -5  -2 5.66985 1.32292   2
  -9  -5  -2 6.68641 1.05400   3
  -9   5  -2 9.12079 1.23116   2
   9   5   2 8.02216 1.42858   1
 -11  -5  -2 -0.2700 0.63652   3
  11  -5   2 -0.4596 0.71476   3
 -11  -5  -2 0.69687 0.91528   2
 -11  -5  -2 0.01966 1.14037   1
 -11   5  -2 -2.2550 0.78826   3
 -11   5  -2 1.55117 0.83638   2
  11   5   2 0.24538 0.97041   1
 -13  -5  -2 1.63300 1.09478   1
 -13  -5  -2 1.86476 0.97605   2
 -13  -5  -2 0.56839 0.70125   3
  13  -5   2 1.01576 0.86910   3
 -13   5  -2 1.34554 0.97012   3
 -13   5  -2 2.43108 0.82515   2
  15  -5   2 -0.6017 0.84770   3
 -15  -5  -2 0.17245 0.67478   3
 -15  -5  -2 1.00118 0.97490   2
 -15  -5  -2 1.15388 1.05976   1
 -17  -5  -2 1.09554 1.10068   1
 -17  -5  -2 -0.7976 0.68921   3
 -17  -5  -2 0.95789 0.97983   2
  17  -5   2 -0.3057 0.97518   3
 -19  -5  -2 5.56967 1.33188   2
 -19  -5  -2 6.53112 1.18637   3
 -19  -5  -2 6.48567 1.43397   1
  19  -5   2 5.72132 1.39223   3
 -21  -5  -2 4.50733 1.26490   1
  21  -5   2 1.21381 1.30561   3
 -21  -5  -2 3.25184 1.17123   2
 -21  -5  -2 2.48149 1.02180   3
 -23  -5  -2 17.9059 2.20520   1
 -23  -5  -2 14.0021 2.06420   2
 -23  -5  -2 13.3611 1.95550   3
  23  -5   2 15.6981 2.25686   3
 -25  -5  -2 -0.6435 0.99236   3
  25  -5   2 -1.3245 1.29677   3
 -25  -5  -2 1.25427 1.17931   1
 -25  -5  -2 0.87187 1.13265   2
  27  -5   2 24.8152 3.12537   3
 -27  -5  -2 22.6242 2.73624   2
 -27  -5  -2 22.8979 2.82337   1
 -27  -5  -2 20.7662 2.72189   3
 -29  -5  -2 12.7158 1.97598   2
 -29  -5  -2 10.2883 1.84434   3
  29  -5   2 9.22207 2.12527   3
 -29  -5  -2 11.1946 1.95485   1
 -29   5  -2 11.4832 1.72684   2
 -31  -5  -2 5.89621 1.61674   3
  31  -5   2 8.89981 2.14251   3
 -31  -5  -2 10.0055 1.76664   1
 -31  -5  -2 6.13341 1.64014   2
 -31   5  -2 6.71991 1.47735   2
 -33  -5  -2 14.7996 2.30115   2
 -33  -5  -2 13.9278 2.32852   1
 -33   5  -2 14.4112 1.98008   2
 -35  -5  -2 2.95390 1.56358   2
 -35  -5  -2 3.36020 1.62875   1
 -35   5  -2 4.20221 1.30161   2
 -37  -5  -2 2.82372 1.63588   1
 -37  -5  -2 2.93676 1.48972   2
 -37   5  -2 2.12824 1.14865   2
 -39  -5  -2 3.42453 1.63371   2
 -39  -5  -2 5.50366 1.77610   1
 -39   5  -2 3.42030 1.26620   2
 -41  -5  -2 19.8364 2.94002   1
 -41  -5  -2 20.5683 2.86604   2
 -41   5  -2 18.8521 2.43647   2
 -43  -5  -2 5.62123 1.80147   2
 -43  -5  -2 3.17452 1.89850   1
 -43   5  -2 6.40770 1.48169   2
 -45  -5  -2 8.51318 2.17513   1
 -45  -5  -2 5.01899 1.89215   2
 -45   5  -2 7.61078 1.60004   2
 -47  -5  -2 0.98279 1.92047   1
 -47  -5  -2 4.25267 1.84119   2
 -47   5  -2 6.23195 1.46564   2
 -49  -5  -2 1.74199 1.95835   1
 -49  -5  -2 1.26066 1.69561   2
 -49   5  -2 2.63829 1.28397   2
 -51  -5  -2 -2.8740 1.62247   2
 -51  -5  -2 -0.2858 2.02999   1
 -51   5  -2 -1.5706 1.91841   1
 -51   5  -2 -0.8981 1.14608   2
 -53  -5  -2 -0.8335 1.71285   2
 -53  -5  -2 1.32612 2.10741   1
 -53   5  -2 -0.7558 1.92472   1
 -53   5  -2 3.58087 1.38228   2
 -55  -5  -2 0.29228 2.18503   1
 -55  -5  -2 -0.1130 1.81090   2
 -55   5  -2 0.57655 2.15872   1
 -52  -6   2 1.44885 1.83923   2
 -52  -6   2 -0.2870 1.98719   1
 -52   6   2 0.10398 2.05804   1
 -50  -6   2 2.28972 2.07845   1
 -50  -6   2 2.15938 1.83788   2
 -50   6   2 0.70877 2.08685   1
 -48  -6   2 2.46508 1.89607   2
 -48  -6   2 -1.8776 1.81587   1
 -48   6   2 1.58920 2.03059   1
 -46  -6   2 0.64757 1.68370   2
 -46  -6   2 1.61593 1.92163   1
 -44  -6   2 0.43416 1.61945   2
 -44  -6   2 0.86540 1.85386   1
 -42  -6   2 5.96214 2.08113   1
 -42  -6   2 4.81404 1.90057   2
 -40  -6   2 1.54712 1.79531   1
 -40  -6   2 0.92857 1.56480   2
 -40   6   2 2.51555 0.99144   2
 -38  -6   2 6.93546 1.87224   2
 -38  -6   2 7.39925 2.07247   1
 -38   6   2 5.98264 1.21990   2
 -36  -6   2 4.79338 1.87805   1
 -36  -6   2 3.69163 1.63161   2
 -36   6   2 4.98639 1.09317   2
 -34  -6   2 3.67937 1.81782   1
 -34  -6   2 5.53250 1.76293   2
 -34   6   2 5.28865 1.07728   2
 -32  -6   2 -1.1524 1.41876   1
 -32  -6   2 -0.4120 1.40740   2
 -32   6   2 -0.3077 0.87156   2
 -30  -6   2 1.83989 1.47690   2
 -30  -6   2 0.85723 1.57449   1
 -30   6   2 1.23891 0.92370   2
 -28  -6   2 0.50514 1.44450   1
 -28  -6   2 1.38456 1.38007   2
 -28   6   2 2.90657 0.96866   2
 -26  -6   2 0.93706 1.12329   3
 -26  -6   2 4.68923 1.71997   1
 -26  -6   2 3.19154 1.48474   2
 -26   6   2 6.06928 1.01342   2
 -24  -6   2 -0.5983 0.81448   3
 -24  -6   2 0.71520 1.39147   1
 -24  -6   2 -0.8037 1.25016   2
 -24   6   2 0.00410 0.76170   2
 -22  -6   2 4.11627 1.37800   2
 -22  -6   2 1.29116 0.93237   3
 -22  -6   2 4.68507 1.61675   1
 -22   6   2 4.06511 0.90829   2
 -20  -6   2 0.61748 1.28502   2
 -20  -6   2 -1.0080 0.68789   3
 -20  -6   2 1.21649 1.39852   1
 -20   6   2 0.35612 0.74768   2
 -18  -6   2 4.70967 1.02031   3
 -18  -6   2 8.35396 1.75470   1
 -18  -6   2 5.21690 1.46801   2
 -18   6   2 6.50284 1.06228   2
 -16  -6   2 0.56856 1.16972   2
 -16  -6   2 1.70641 1.36268   1
 -16  -6   2 0.29883 0.63766   3
 -16   6   2 1.22040 0.75059   2
 -14  -6   2 0.95000 0.59081   3
 -14  -6   2 -0.5386 1.13907   2
 -14  -6   2 2.11367 1.39221   1
 -14   6   2 1.32518 0.71815   2
 -12  -6   2 -0.5615 1.27547   1
 -12  -6   2 0.04471 0.52367   3
 -12  -6   2 -0.1855 1.15388   2
 -12   6   2 1.22304 0.71789   2
 -12   6   2 -0.2939 0.67780   3
 -10  -6   2 23.7436 2.92843   1
 -10  -6   2 22.5547 2.66827   2
 -10  -6   2 21.9019 2.15837   3
 -10   6   2 20.1856 2.26471   2
  -8  -6   2 15.4863 2.28879   1
  -8  -6   2 14.5071 2.07335   2
  -8  -6   2 12.5523 1.39168   3
  -8   6   2 15.5968 1.63086   2
  -6  -6   2 7.28087 1.80254   1
  -6  -6   2 4.32708 1.55311   2
  -6   6   2 6.98770 1.08495   2
  -4  -6   2 7.36254 1.89853   1
  -4  -6   2 6.75641 1.69001   2
  -4   6   2 8.20100 1.19508   2
  -2  -6   2 4.20807 1.35514   2
  -2  -6   2 2.80750 1.52579   1
   2  -6  -2 1.73826 1.19534   2
   0  -6   2 2.01974 1.57234   1
   0  -6  -2 -0.1427 1.14806   2
  -2  -6  -2 4.79432 1.46255   1
  -2  -6  -2 2.15106 1.19494   2
  -4  -6  -2 7.66390 1.50952   2
  -4  -6  -2 7.85452 1.70533   1
   4  -6   2 7.71879 1.01052   3
  -6  -6  -2 6.48728 1.45251   2
   6  -6   2 6.18048 0.96457   3
  -6  -6  -2 7.90835 1.72897   1
   8  -6   2 12.7473 1.64010   3
  -8  -6  -2 15.7892 2.19894   1
  -8  -6  -2 15.9165 2.02780   2
 -10  -6  -2 21.4167 2.25734   3
 -10  -6  -2 21.2790 2.64037   1
  10  -6   2 21.3796 2.32619   3
 -10  -6  -2 21.8899 2.57853   2
 -12  -6  -2 0.47889 0.73267   3
 -12  -6  -2 0.91862 1.06598   2
  12  -6   2 -0.3899 0.82280   3
 -12  -6  -2 1.35188 1.29338   1
 -14  -6  -2 1.81955 1.25168   1
 -14  -6  -2 0.10274 0.70966   3
  14  -6   2 0.53306 0.91608   3
 -14  -6  -2 1.23850 1.10230   2
 -16  -6  -2 2.17024 1.21874   2
  16  -6   2 0.39700 1.01601   3
 -16  -6  -2 0.45607 0.80724   3
 -16  -6  -2 1.08526 1.27037   1
 -18  -6  -2 5.10988 1.13658   3
  18  -6   2 5.26478 1.35249   3
 -18  -6  -2 5.66815 1.46483   2
 -18  -6  -2 6.25814 1.55990   1
  20  -6   2 -1.5422 1.04594   3
 -20  -6  -2 -0.9128 0.83963   3
 -20  -6  -2 1.45487 1.28802   1
 -20  -6  -2 0.98719 1.18393   2
 -22  -6  -2 1.49502 1.06723   3
 -22  -6  -2 1.98422 1.34242   1
  22  -6   2 1.17408 1.31903   3
 -22  -6  -2 3.75186 1.37077   2
 -24  -6  -2 1.97159 1.37441   1
 -24  -6  -2 -0.0289 1.29440   2
 -24  -6  -2 -1.4502 0.89344   3
 -26  -6  -2 1.38498 1.23121   3
 -26  -6  -2 6.45629 1.55648   1
 -26  -6  -2 3.34474 1.49684   2
 -28  -6  -2 1.10662 1.88287   3
 -28  -6  -2 0.59931 1.30416   2
 -28  -6  -2 0.91763 1.40204   1
 -30  -6  -2 1.60092 1.40023   2
 -30  -6  -2 0.08705 1.33640   1
 -32  -6  -2 -1.4877 1.22827   2
 -32  -6  -2 0.53995 1.44418   1
 -32   6  -2 0.16799 1.22096   2
 -34  -6  -2 7.28605 1.83684   1
 -34  -6  -2 2.51008 1.57086   2
 -34   6  -2 4.22293 1.34522   2
 -36  -6  -2 3.24155 1.62530   2
 -36  -6  -2 6.78574 1.86460   1
 -36   6  -2 5.42247 1.44071   2
 -38  -6  -2 4.37732 1.73036   2
 -38  -6  -2 7.50536 1.96152   1
 -38   6  -2 5.75044 1.42886   2
 -40  -6  -2 3.00844 1.78259   1
 -40  -6  -2 2.18064 1.65739   2
 -40   6  -2 2.43084 1.23978   2
 -42  -6  -2 5.96539 1.86857   2
 -42  -6  -2 7.97561 2.13690   1
 -42   6  -2 5.04795 1.43741   2
 -44  -6  -2 4.93986 1.98267   1
 -44  -6  -2 0.80974 1.57910   2
 -44   6  -2 0.19421 1.17987   2
 -46  -6  -2 0.65000 1.65770   2
 -46  -6  -2 4.13323 2.00706   1
 -46   6  -2 0.27354 1.20704   2
 -48  -6  -2 0.13148 1.74800   2
 -48  -6  -2 -0.4214 1.89848   1
 -48   6  -2 0.87003 1.48670   2
 -50  -6  -2 1.03703 1.77479   2
 -50  -6  -2 -0.2646 1.95557   1
 -52  -6  -2 0.28372 2.02364   1
 -52  -6  -2 -0.0779 1.77135   2
 -47  -7   2 -0.3220 1.83002   2
 -47  -7   2 3.49096 2.08709   1
 -45  -7   2 0.04205 1.68986   2
 -45  -7   2 -0.9599 1.81240   1
 -43  -7   2 1.70772 1.86350   2
 -43  -7   2 3.26564 2.01844   1
 -41  -7   2 1.77710 1.81013   2
 -41  -7   2 4.25615 2.01556   1
 -39  -7   2 0.49044 1.77219   1
 -39  -7   2 1.97620 1.75943   2
 -37  -7   2 5.86583 1.97422   2
 -37  -7   2 7.14835 2.14324   1
 -35  -7   2 -0.5514 1.57801   2
 -35  -7   2 0.22804 1.76418   1
 -33  -7   2 3.60477 1.86882   1
 -33  -7   2 0.48926 1.58821   2
 -33   7   2 1.71466 0.98637   2
 -31  -7   2 1.41971 1.72414   1
 -31  -7   2 0.22133 1.45687   2
 -31   7   2 -0.2450 0.94172   2
 -29  -7   2 1.13128 1.56385   2
 -29  -7   2 5.29936 1.85958   1
 -29   7   2 5.04747 1.19615   2
 -27  -7   2 1.69737 1.61560   1
 -27  -7   2 -0.2324 1.41189   2
 -25  -7   2 0.79761 1.71254   1
 -25  -7   2 3.72197 1.61735   2
 -23  -7   2 6.23065 1.79443   2
 -23  -7   2 7.31666 2.07906   1
 -21  -7   2 1.76319 1.45721   2
 -21  -7   2 0.52236 0.90516   3
 -21  -7   2 2.03572 1.75845   1
 -19  -7   2 19.1776 2.85754   2
 -19  -7   2 24.0090 3.07897   1
 -19  -7   2 20.9345 2.39155   3
 -17  -7   2 6.95960 1.72777   2
 -17  -7   2 5.90730 1.10913   3
 -17  -7   2 6.44692 1.99372   1
 -15  -7   2 20.0950 2.69495   1
 -15  -7   2 17.1000 2.45551   2
 -15  -7   2 15.5227 1.86193   3
 -13  -7   2 15.2086 2.41372   1
 -13  -7   2 11.7930 1.45654   3
 -13  -7   2 13.8562 2.22700   2
 -11  -7   2 9.86404 1.20535   3
 -11  -7   2 12.3659 2.18221   1
 -11  -7   2 11.7436 2.05409   2
  -9  -7   2 1.21240 1.67517   1
  -9  -7   2 -1.0033 1.42911   2
  -7  -7   2 0.23618 1.72373   1
  -7  -7   2 -1.3321 1.39893   2
  -5  -7   2 3.13142 1.81160   1
  -5  -7   2 5.02956 1.74037   2
  -3  -7   2 25.2357 3.56081   1
  -3  -7   2 28.2358 3.28834   2
  -1  -7   2 21.1207 3.13569   1
   1  -7  -2 23.9337 2.75979   2
  -1  -7  -2 22.6192 2.84291   2
  -3  -7  -2 26.2594 3.23245   2
  -3  -7  -2 27.9904 3.25616   1
  -5  -7  -2 5.08651 1.78763   1
  -5  -7  -2 6.09581 1.57149   2
  -7  -7  -2 -1.3536 1.41397   1
  -7  -7  -2 2.97130 1.33945   2
  -9  -7  -2 -1.5116 1.34925   1
  -9  -7  -2 -0.0691 1.28720   2
 -11  -7  -2 11.0324 2.13163   1
 -11  -7  -2 11.4210 1.94734   2
 -13  -7  -2 11.5507 1.57632   3
 -13  -7  -2 11.4572 1.99773   2
 -13  -7  -2 15.6205 2.22545   1
 -15  -7  -2 18.4925 2.53899   2
 -15  -7  -2 17.7059 2.07743   3
 -15  -7  -2 19.2210 2.59748   1
 -17  -7  -2 7.63736 1.68312   2
 -17  -7  -2 6.22147 1.29380   3
 -17  -7  -2 6.62314 1.73742   1
 -19  -7  -2 19.7095 2.40531   3
 -19  -7  -2 20.8512 2.85081   1
 -19  -7  -2 23.4471 2.85256   2
 -21  -7  -2 0.50420 1.13062   3
 -21  -7  -2 2.99114 1.52128   2
 -21  -7  -2 3.26218 1.60322   1
 -23  -7  -2 7.05609 1.78332   2
 -23  -7  -2 7.88064 1.97124   1
 -25  -7  -2 2.53103 1.54847   2
 -25  -7  -2 3.97484 1.68195   1
 -27  -7  -2 0.16764 1.45268   2
 -27  -7  -2 -0.2703 1.46672   1
 -29  -7  -2 3.04215 1.62585   2
 -29  -7  -2 2.09536 1.64928   1
 -31  -7  -2 1.84535 1.63870   1
 -31  -7  -2 -2.2831 1.47619   2
 -33  -7  -2 3.96309 1.76058   1
 -33  -7  -2 0.47057 1.55384   2
 -33   7  -2 0.30119 1.27377   2
 -35  -7  -2 3.04788 1.67156   2
 -35  -7  -2 2.79004 1.75683   1
 -35   7  -2 2.52326 1.38497   2
 -37  -7  -2 5.04218 2.01617   2
 -37  -7  -2 6.56091 2.03641   1
 -37   7  -2 6.26182 1.56727   2
 -39  -7  -2 1.04165 1.68254   2
 -39  -7  -2 1.43151 1.71169   1
 -39   7  -2 0.29085 1.21134   2
 -41  -7  -2 4.05699 1.99151   2
 -41  -7  -2 4.82967 2.02330   1
 -41   7  -2 4.52764 1.35754   2
 -43  -7  -2 0.50713 1.82328   1
 -43  -7  -2 -1.1120 1.66194   2
 -45  -7  -2 1.00473 1.77931   2
 -45  -7  -2 -0.9209 1.81066   1
 -47  -7  -2 -0.3477 1.77064   2
 -47  -7  -2 -0.0997 1.89595   1
 -42  -8   2 7.56126 2.32287   2
 -42  -8   2 8.62999 2.58681   1
 -40  -8   2 4.57602 2.03677   2
 -40  -8   2 7.04254 2.33287   1
 -38  -8   2 17.9956 3.00696   2
 -38  -8   2 20.4664 3.25401   1
 -36  -8   2 9.18779 2.20303   2
 -36  -8   2 8.18053 2.43629   1
 -34  -8   2 4.41520 1.99306   2
 -34  -8   2 5.80386 2.09426   1
 -32  -8   2 -1.0615 1.62718   2
 -32  -8   2 -0.3059 1.82354   1
 -30  -8   2 1.08451 1.89729   1
 -30  -8   2 0.19722 1.69032   2
 -28  -8   2 6.29180 1.98427   2
 -28  -8   2 5.64639 2.14185   1
 -26  -8   2 8.51106 2.09928   2
 -26  -8   2 9.36489 2.27820   1
 -24  -8   2 30.4880 3.92213   1
 -24  -8   2 27.9062 3.70392   2
 -22  -8   2 12.0854 2.52817   1
 -22  -8   2 9.45361 2.28470   2
 -20  -8   2 12.7206 2.43556   2
 -20  -8   2 13.9829 2.64406   1
 -18  -8   2 4.86067 1.92293   1
 -18  -8   2 0.76659 1.63664   2
 -16  -8   2 1.44659 1.67593   2
 -16  -8   2 1.52878 1.85451   1
 -14  -8   2 6.18980 0.94744   3
 -14  -8   2 9.37021 2.08507   2
 -14  -8   2 7.59507 2.15821   1
 -12  -8   2 1.49350 1.75464   2
 -12  -8   2 3.27946 1.90111   1
 -10  -8   2 21.4509 3.06969   2
 -10  -8   2 20.2520 3.17046   1
  -8  -8   2 16.7769 2.56125   2
  -8  -8   2 10.0346 2.61425   1
  -6  -8   2 19.9294 2.93147   2
  -6  -8   2 19.5927 3.15405   1
  -4  -8   2 55.6065 6.03348   1
  -2  -8   2 13.2443 2.68552   1
  -2  -8  -2 10.2702 2.07239   2
  -4  -8  -2 41.5523 4.48356   2
  -6  -8  -2 26.0082 3.27279   1
  -6  -8  -2 21.1879 3.04671   2
  -8  -8  -2 16.3923 2.55334   2
  -8  -8  -2 17.6322 2.72217   1
 -10  -8  -2 19.4421 2.70830   2
 -10  -8  -2 18.0909 2.82411   1
 -12  -8  -2 4.02611 1.81120   1
 -12  -8  -2 4.37001 1.64207   2
 -14  -8  -2 8.49323 2.10988   1
 -14  -8  -2 6.16145 1.81693   2
 -16  -8  -2 2.60976 1.60792   2
 -16  -8  -2 1.10773 1.57817   1
 -18  -8  -2 2.19120 1.66768   2
 -18  -8  -2 4.90964 1.76315   1
 -20  -8  -2 13.5551 2.45744   2
 -20  -8  -2 16.4195 2.55514   1
 -22  -8  -2 9.89636 2.20486   2
 -22  -8  -2 14.0749 2.40000   1
 -24  -8  -2 36.7375 3.94912   1
 -24  -8  -2 29.1727 3.79100   2
 -26  -8  -2 10.6346 2.15179   2
 -26  -8  -2 6.26460 2.01570   1
 -28  -8  -2 6.26532 1.96630   1
 -28  -8  -2 5.00942 1.86339   2
 -30  -8  -2 1.75900 1.67968   1
 -30  -8  -2 -0.2911 1.60287   2
 -32  -8  -2 -1.3847 1.57603   2
 -32  -8  -2 0.55776 1.65915   1
 -34  -8  -2 5.70474 1.94311   2
 -34  -8  -2 4.18996 1.91418   1
 -34   8  -2 5.85532 1.66165   2
 -36  -8  -2 8.62881 2.19095   1
 -36  -8  -2 5.27804 2.04902   2
 -38  -8  -2 16.6720 2.94775   2
 -38  -8  -2 19.4729 3.01674   1
 -40  -8  -2 7.27184 2.29299   1
 -40  -8  -2 7.49327 2.23605   2
 -42  -8  -2 4.49721 2.10975   2
 -42  -8  -2 4.50181 2.18445   1
 -35  -9   2 2.55154 2.21959   1
 -35  -9   2 0.33973 1.89339   2
 -33  -9   2 11.9011 2.73933   1
 -33  -9   2 10.7537 2.55732   2
 -31  -9   2 3.36212 2.13606   1
 -31  -9   2 0.43818 2.01052   2
 -29  -9   2 15.1599 2.88058   2
 -29  -9   2 16.5322 3.06480   1
 -27  -9   2 9.29999 2.49695   1
 -27  -9   2 8.53820 2.35706   2
 -25  -9   2 6.24855 2.16253   1
 -25  -9   2 3.53306 1.94063   2
 -23  -9   2 -2.1867 1.68531   2
 -23  -9   2 3.37876 2.01061   1
 -21  -9   2 1.55911 1.80849   2
 -21  -9   2 4.74242 2.02908   1
 -19  -9   2 23.4015 3.55400   2
 -19  -9   2 27.6403 3.72263   1
 -17  -9   2 16.3720 2.85327   2
 -17  -9   2 18.4074 3.12246   1
 -15  -9   2 32.7586 4.22902   2
 -15  -9   2 33.3235 4.31777   1
 -13  -9   2 26.7927 3.80782   1
 -13  -9   2 26.0873 3.57487   2
 -11  -9   2 15.1350 2.56849   2
 -11  -9   2 8.01082 2.51984   1
  -9  -9   2 5.76075 2.07398   2
  -9  -9   2 4.10994 2.19661   1
  -7  -9   2 2.55088 1.97994   1
  -5  -9   2 6.87272 2.20583   1
  -5  -9  -2 1.09747 1.70442   2
  -7  -9  -2 0.82660 1.59857   2
  -7  -9  -2 2.09657 1.81279   1
  -9  -9  -2 5.02461 2.01056   2
  -9  -9  -2 7.94725 2.16998   1
 -11  -9  -2 6.93960 2.24502   1
 -11  -9  -2 12.2872 2.26776   2
 -13  -9  -2 30.1962 3.70609   1
 -13  -9  -2 25.4083 3.56993   2
 -15  -9  -2 32.4061 3.92143   1
 -15  -9  -2 30.9942 3.94068   2
 -17  -9  -2 14.2242 2.64969   2
 -17  -9  -2 16.8962 2.78732   1
 -19  -9  -2 27.8068 3.64155   1
 -19  -9  -2 24.6532 3.53994   2
 -21  -9  -2 3.48657 1.86729   1
 -21  -9  -2 3.27854 1.80422   2
 -23  -9  -2 1.36013 1.63334   1
 -23  -9  -2 -1.0069 1.73865   2
 -25  -9  -2 4.25642 2.03521   2
 -25  -9  -2 7.07652 2.07085   1
 -27  -9  -2 9.56198 2.33905   2
 -27  -9  -2 10.8338 2.38979   1
 -29  -9  -2 17.4898 2.98592   1
 -29  -9  -2 17.2992 2.88735   2
 -31  -9  -2 4.19144 2.02383   2
 -31  -9  -2 3.60717 2.02818   1
 -33  -9  -2 13.9743 2.64338   2
 -33  -9  -2 13.1265 2.75993   1
 -35  -9  -2 -0.0022 1.94692   1
 -35  -9  -2 -1.9263 1.77688   2
 -26 -10   2 5.01639 2.39429   1
 -26 -10   2 5.45970 2.28601   2
 -24 -10   2 40.3464 4.91321   1
 -24 -10   2 38.0116 4.67404   2
 -22 -10   2 18.7528 3.32616   2
 -22 -10   2 21.6413 3.47316   1
 -20 -10   2 11.3054 2.80264   2
 -20 -10   2 18.9793 3.11536   1
 -18 -10   2 -0.8344 2.06250   2
 -18 -10   2 -1.4895 1.94337   1
 -16 -10   2 1.19091 1.93014   1
 -16 -10   2 1.51966 2.03251   2
 -14 -10   2 10.5500 2.64165   1
 -14 -10   2 9.90862 2.57211   2
 -12 -10   2 0.78455 1.88349   2
 -12 -10   2 2.43746 2.19414   1
 -10 -10   2 50.9332 5.82645   1
  -8 -10   2 41.0212 4.99659   1
  -8 -10  -2 37.7597 4.48844   2
 -10 -10  -2 46.4911 5.18156   2
 -12 -10  -2 3.19646 2.00001   1
 -12 -10  -2 5.89834 2.08079   2
 -14 -10  -2 10.8324 2.48197   1
 -14 -10  -2 10.1098 2.46836   2
 -16 -10  -2 -1.2307 1.77731   2
 -16 -10  -2 0.23232 1.69493   1
 -18 -10  -2 1.85523 1.93309   1
 -18 -10  -2 1.75819 1.95750   2
 -20 -10  -2 13.4939 2.80017   2
 -20 -10  -2 16.4983 2.89027   1
 -22 -10  -2 22.4091 3.35937   2
 -22 -10  -2 21.3851 3.36485   1
 -24 -10  -2 37.3840 4.84414   2
 -24 -10  -2 41.8978 4.81600   1
 -26 -10  -2 7.85673 2.31754   1
 -26 -10  -2 8.05326 2.45047   2
 -62   0   3 -0.3624 2.09408   1
 -62   0   3 0.55827 1.50718   2
 -60   0   3 -0.6219 1.43824   2
 -60   0   3 0.23301 2.09916   1
 -58   0   3 -1.6970 1.78344   1
 -58   0   3 -2.2265 1.33344   2
 -56   0   3 1.51742 1.43560   2
 -56   0   3 -0.2206 1.90917   1
 -54   0   3 -0.4059 1.25772   2
 -54   0   3 0.65056 1.82256   1
 -52   0   3 1.17214 1.42893   2
 -52   0   3 0.08336 1.82964   1
 -50   0   3 -0.0174 1.25517   2
 -50   0   3 -1.3654 1.77214   1
 -48   0   3 -2.0232 1.63603   1
 -48   0   3 -1.1994 1.16493   2
 -46   0   3 1.01306 1.65778   1
 -46   0   3 1.97112 1.25003   2
 -44   0   3 -0.1108 1.54912   1
 -44   0   3 -1.4056 1.03209   2
 -42   0   3 1.77500 1.57410   1
 -42   0   3 1.48407 1.09681   2
 -40   0   3 -0.1787 1.31644   1
 -40   0   3 0.28284 0.97481   2
 -38   0   3 2.36675 1.08622   2
 -38   0   3 1.96821 1.48611   1
 -36   0   3 0.98135 1.32221   1
 -36   0   3 0.50839 0.89944   2
 -34   0   3 0.54065 1.13716   1
 -34   0   3 0.34740 0.83637   2
 -32   0   3 0.20733 0.76462   2
 -32   0   3 1.36875 1.14315   1
 -30   0   3 1.07807 1.12012   1
 -30   0   3 0.68084 0.76121   2
 -28   0   3 0.79597 0.75949   2
 -28   0   3 -0.5614 1.03350   1
  28   0  -3 -0.1899 0.73336   2
 -26   0   3 -0.0365 1.02401   1
 -26   0   3 0.18519 0.72380   2
  26   0  -3 -0.1582 0.69055   2
 -24   0   3 4.68506 1.22273   1
 -24   0   3 2.13213 0.98807   3
  24   0  -3 -0.0789 0.46339   2
 -24   0   3 4.19912 0.83390   2
 -22   0   3 1.73619 0.68754   2
  22   0  -3 0.80990 0.66415   2
 -22   0   3 -0.6896 0.75076   3
 -22   0   3 2.46390 1.00413   1
  22   0  -3 0.50473 0.93581   1
  20   0  -3 0.69237 0.57105   2
  20   0  -3 -0.2970 0.58481   1
 -20   0   3 -0.0681 0.49326   3
 -20   0   3 0.24949 0.57921   2
 -20   0   3 -0.6322 0.82702   1
 -18   0   3 0.43618 0.54361   2
 -18   0   3 0.76782 0.81182   1
  18   0  -3 0.06158 0.54042   1
  18   0  -3 0.04971 0.57221   2
  16   0  -3 0.03050 0.54653   2
  16   0  -3 1.26381 0.77721   1
 -16   0   3 0.60737 0.52174   2
 -16   0   3 1.12345 0.80687   1
 -14   0   3 0.59228 0.49614   2
  14   0  -3 0.35947 0.52423   2
 -14   0   3 1.64756 0.77310   1
  14   0  -3 1.23781 0.76773   1
  12   0  -3 0.42043 0.50625   2
 -12   0   3 -0.1829 0.66230   1
 -12   0   3 -0.2772 0.44495   2
  12   0  -3 -0.3595 0.69927   1
 -10   0   3 0.25197 0.42398   2
  10   0  -3 0.64696 0.46017   2
  10   0  -3 0.43840 0.72209   1
 -10   0   3 0.46878 0.64020   1
   8   0  -3 0.13882 0.44077   2
  -8   0   3 0.47735 0.58510   1
  -8   0   3 0.53939 0.43111   2
   8   0  -3 0.23334 0.59281   1
   6   0  -3 0.38001 0.52227   1
  -6   0   3 0.37349 0.49734   1
   6   0  -3 0.27817 0.40606   2
  -6   0   3 0.17939 0.37538   2
   4   0  -3 -0.0033 0.35372   2
   4   0  -3 0.18684 0.38318   1
  -4   0   3 0.17999 0.30804   2
  -4   0   3 0.08897 0.35859   1
   2   0  -3 0.15706 0.33085   1
  -2   0   3 -0.0311 0.27876   1
   0   0   3 0.16625 0.28233   1
   0   0  -3 0.22458 0.35751   1
   2   0   3 -0.2274 0.54590   3
   4   0   3 0.04430 0.61551   3
  -4   0  -3 -0.1854 0.64393   3
   6   0   3 0.05587 0.69615   3
  -6   0  -3 0.46106 0.73422   3
  -6   0  -3 0.03444 0.56867   2
  -8   0  -3 0.81314 0.81842   3
  -8   0  -3 -0.1227 0.64360   2
   8   0   3 -0.0524 0.33379   2
   8   0   3 0.08165 0.76545   3
  10   0   3 0.19175 0.74723   3
 -10   0  -3 0.03426 0.62409   2
  10   0   3 -0.1766 0.65709   2
 -10   0  -3 0.60298 0.71726   3
 -12   0  -3 -1.3670 0.62121   2
  12   0   3 -0.6607 0.67385   2
  12   0   3 -0.3450 0.75914   3
 -12   0  -3 -0.9078 0.72168   3
  14   0   3 0.34477 0.78283   3
 -14   0  -3 1.18218 0.73729   3
  14   0   3 0.81475 0.70155   2
 -14   0  -3 0.76042 0.70463   2
 -16   0  -3 -0.3824 0.71625   2
  16   0   3 0.05197 0.80862   3
  16   0   3 -0.4260 0.70654   2
 -16   0  -3 -0.0334 0.71019   3
  18   0   3 -0.6771 0.69215   2
 -18   0  -3 0.13633 0.72810   2
 -18   0  -3 -0.6005 0.72271   3
 -18   0  -3 0.45299 0.92028   1
  18   0   3 -0.1858 0.88168   3
 -20   0  -3 -0.4056 0.50832   3
 -20   0  -3 0.46033 1.05692   1
  20   0   3 -0.3986 0.54753   2
 -20   0  -3 0.69015 0.78001   2
  20   0   3 -0.1539 0.93945   3
 -22   0  -3 0.58708 0.84860   3
  22   0   3 1.24969 1.13273   3
 -22   0  -3 1.13826 0.87223   2
 -22   0  -3 1.68863 1.16683   1
  22   0   3 1.36578 0.92663   2
 -24   0  -3 2.29515 1.04931   2
  24   0   3 3.28846 1.11078   2
  24   0   3 4.97878 1.38946   3
 -24   0  -3 4.55294 1.39364   1
 -24   0  -3 3.54058 1.11839   3
  26   0   3 -0.3736 1.07549   3
 -26   0  -3 -0.2566 0.89296   2
 -26   0  -3 -0.8604 1.09705   1
 -28   0  -3 -1.5538 1.12118   1
  28   0   3 -0.4511 1.17863   3
 -28   0  -3 -1.5828 0.82387   2
 -30   0  -3 -0.4169 1.14500   1
 -30   0  -3 0.02196 0.93377   2
  30   0   3 -1.0461 1.16035   3
  32   0   3 1.39667 1.34415   3
 -32   0  -3 -0.4009 1.18334   1
 -32   0  -3 -1.1088 0.93740   2
  34   0   3 0.78870 1.41353   3
 -34   0  -3 -1.1862 1.25766   1
 -34   0  -3 1.01492 0.99403   2
 -36   0  -3 -1.6779 1.25083   1
  36   0   3 -0.8863 1.47124   3
 -36   0  -3 -1.6312 0.95142   2
  38   0   3 2.24997 1.70604   3
 -38   0  -3 1.62754 1.18654   2
 -38   0  -3 2.79603 1.56830   1
 -40   0  -3 0.54422 1.41388   1
 -40   0  -3 0.20478 1.07187   2
  40   0   3 1.23640 1.68539   3
 -42   0  -3 0.65313 1.57694   1
  42   0   3 0.75707 1.76470   3
 -42   0  -3 2.38525 1.33216   2
 -44   0  -3 0.27518 1.13182   2
 -44   0  -3 -0.4528 1.62048   1
 -46   0  -3 -0.9326 1.23336   2
 -46   0  -3 1.58229 1.79673   1
 -48   0  -3 0.42544 1.83076   1
 -48   0  -3 -1.3570 1.27896   2
 -50   0  -3 -0.5303 1.31639   2
 -50   0  -3 -0.0673 1.81150   1
 -52   0  -3 -0.4444 1.89801   1
 -52   0  -3 -0.0232 1.45337   2
 -54   0  -3 -0.8872 1.83662   1
 -54   0  -3 -0.7891 1.38871   2
 -56   0  -3 -0.2515 2.01489   1
 -56   0  -3 -0.5443 1.38161   2
 -58   0  -3 1.00294 1.45092   2
 -58   0  -3 -3.5987 1.90997   1
 -60   0  -3 -1.5172 1.49493   2
 -60   0  -3 0.04313 2.14069   1
 -62   0  -3 -1.1883 2.08948   1
 -62   0  -3 -1.3450 1.42650   2
 -61  -1   3 4.14581 1.69936   2
 -61  -1   3 -0.9239 1.90462   1
 -61   1   3 -0.6537 2.07808   1
 -61   1   3 1.93498 1.47039   2
 -59  -1   3 -0.5318 1.43934   2
 -59  -1   3 0.66492 2.03226   1
 -59   1   3 -1.7479 1.24463   2
 -59   1   3 -0.7402 1.91058   1
 -57  -1   3 -0.1703 1.97875   1
 -57  -1   3 5.40157 1.71675   2
 -57   1   3 0.40919 2.07466   1
 -57   1   3 3.28255 1.45655   2
 -55  -1   3 1.76000 1.50480   2
 -55  -1   3 -0.9286 1.82555   1
 -55   1   3 1.53552 1.96009   1
 -55   1   3 2.31887 1.36654   2
 -53  -1   3 1.70065 1.98165   1
 -53  -1   3 5.19571 1.62756   2
 -53   1   3 4.51931 2.09162   1
 -53   1   3 2.76206 1.31518   2
 -51  -1   3 2.51094 1.52421   2
 -51  -1   3 2.03241 1.89581   1
 -51   1   3 0.44555 1.83454   1
 -51   1   3 1.39876 1.30569   2
 -49  -1   3 7.09912 1.61677   2
 -49  -1   3 1.79439 1.77730   1
 -49   1   3 4.08921 1.94456   1
 -49   1   3 5.15455 1.41589   2
 -47  -1   3 3.13042 1.69867   1
 -47  -1   3 2.67104 1.39575   2
 -47   1   3 1.93882 1.20371   2
 -47   1   3 0.50302 1.64741   1
 -45  -1   3 -0.4883 1.17191   2
 -45  -1   3 0.08911 1.58605   1
 -45   1   3 1.30979 1.66889   1
 -45   1   3 -0.0576 1.06010   2
 -43  -1   3 8.74367 1.64726   2
 -43  -1   3 9.06216 2.02282   1
 -43   1   3 8.70392 1.53895   2
 -43   1   3 7.95097 2.02849   1
 -41  -1   3 0.92948 1.39942   1
 -41  -1   3 2.79248 1.23427   2
 -41   1   3 1.43984 1.04511   2
 -41   1   3 1.44232 1.64378   1
 -39  -1   3 11.5977 2.13579   1
 -39  -1   3 10.6528 1.81091   2
 -39   1   3 14.7240 2.25480   1
 -39   1   3 13.8230 1.75347   2
 -37  -1   3 4.39701 1.46684   1
 -37  -1   3 4.37945 1.22182   2
 -37   1   3 5.40217 1.15551   2
 -37   1   3 3.35130 1.56170   1
 -35  -1   3 8.33086 1.47009   2
 -35  -1   3 7.86314 1.67581   1
 -35   1   3 10.5745 1.40612   2
 -35   1   3 8.86436 1.81376   1
 -33  -1   3 -0.2335 0.85149   2
 -33  -1   3 2.85120 1.18461   1
 -33   1   3 0.76054 0.79176   2
 -33   1   3 0.79947 1.20532   1
  31  -1  -3 0.57486 0.72016   2
 -31  -1   3 1.24987 1.05623   1
 -31  -1   3 0.49185 0.81703   2
 -31   1   3 1.18345 1.15803   1
 -31   1   3 0.72980 0.72872   2
 -29  -1   3 12.9325 1.88106   1
 -29  -1   3 11.1549 1.64032   2
  29  -1  -3 11.4228 1.56470   2
 -29   1   3 14.5521 1.97091   1
 -29   1   3 15.1476 1.62189   2
 -27  -1   3 8.32907 1.42841   1
 -27  -1   3 8.05551 1.22893   2
 -27  -1   3 7.50159 1.48127   3
 -27   1   3 7.09280 1.11048   2
 -27   1   3 8.22451 1.56112   1
  25  -1  -3 29.6049 2.76652   2
 -25  -1   3 26.2788 2.85417   2
 -25  -1   3 26.3672 3.01294   3
 -25  -1   3 26.2821 2.99640   1
  25   1  -3 27.2686 2.80413   2
 -25   1   3 26.3851 3.09269   1
 -25   1   3 29.5219 2.73115   2
  23  -1  -3 1.90757 0.69936   2
 -23  -1   3 2.48689 1.02448   1
 -23  -1   3 -0.0584 0.47822   3
 -23  -1   3 1.33444 0.77175   2
 -23   1   3 0.85045 0.67352   2
  23   1  -3 1.63028 0.77572   2
 -23   1   3 -0.3370 1.02563   1
 -21  -1   3 29.1394 3.24980   1
 -21  -1   3 32.4737 3.13561   2
 -21  -1   3 31.8040 3.29194   3
  21  -1  -3 32.2303 3.06443   2
 -21   1   3 32.0099 3.30522   1
 -21   1   3 28.6118 3.27558   3
 -21   1   3 34.4241 3.06293   2
 -19  -1   3 0.91822 0.68668   2
 -19  -1   3 1.70458 0.89646   1
  19  -1  -3 1.60051 0.59296   2
 -19   1   3 2.26982 0.99351   1
 -19   1   3 -0.4052 0.49307   3
  19   1  -3 0.34238 0.50919   2
 -19   1   3 1.24636 0.53290   2
 -17  -1   3 6.70407 1.04170   2
  17  -1  -3 8.10693 0.95288   2
 -17  -1   3 6.47033 1.17182   1
 -17   1   3 6.53722 1.22139   1
 -17   1   3 7.31145 0.90896   2
  17   1  -3 7.63891 1.02002   2
 -15  -1   3 5.18781 0.89462   2
 -15  -1   3 6.29487 1.09136   1
  15  -1  -3 5.64849 0.79857   2
 -15   1   3 6.27469 0.76523   2
  15   1  -3 5.94878 0.87538   2
 -15   1   3 6.02345 1.09527   1
 -13  -1   3 2.63882 0.69703   2
 -13  -1   3 2.93660 0.87364   1
  13  -1  -3 3.24334 0.56331   2
 -13   1   3 3.69758 0.94246   1
 -13   1   3 2.99124 0.50240   2
  13   1  -3 2.36867 0.69293   2
 -11  -1   3 31.4928 3.07290   2
 -11  -1   3 33.2640 3.16861   1
  11  -1  -3 33.2757 2.97504   2
 -11   1   3 30.9715 2.95644   2
 -11   1   3 39.9653 3.21034   1
  11   1  -3 26.6930 3.04632   2
  -9  -1   3 1.32336 0.74447   1
   9  -1  -3 2.10051 0.38548   2
  -9  -1   3 2.01631 0.62015   2
   9   1  -3 1.88714 0.62439   2
  -9   1   3 2.58688 0.73781   1
   9   1  -3 0.68607 0.62475   1
  -9   1   3 2.15256 0.34409   2
  -7  -1   3 11.1569 1.29709   1
   7   1  -3 8.97950 1.25925   1
  -5  -1   3 3.74147 0.87228   1
  -5  -1   3 4.58966 0.79560   2
   5   1  -3 3.90267 0.79395   2
   5   1  -3 4.43546 0.89235   1
  -3  -1   3 57.8136 5.17835   2
  -3  -1   3 53.5620 5.20991   1
   3   1  -3 56.1168 5.17137   2
   3   1  -3 56.2602 5.22521   1
   1   1  -3 31.1778 3.64387   1
  -1   1   3 41.9414 3.47048   2
  -1  -1  -3 46.8965 4.28140   2
   1   1   3 46.9350 4.27783   2
  -3  -1  -3 71.3139 5.68097   2
   3   1   3 52.6509 5.60863   1
   3   1   3 64.3183 5.67279   2
   5  -1   3 2.55753 1.00063   3
  -5  -1  -3 3.20772 0.93941   3
  -5  -1  -3 5.14568 0.74982   2
   5   1   3 4.13315 0.92934   3
   5   1   3 6.18479 0.75666   2
   5   1   3 4.62571 0.62053   1
  -5   1  -3 3.30622 0.91621   3
  -7  -1  -3 21.2066 2.32200   3
  -7  -1  -3 23.7434 2.15388   1
  -7  -1  -3 23.3971 2.21184   2
   7  -1   3 19.4148 2.35484   3
   7   1   3 28.4969 2.21031   1
   7   1   3 16.9200 2.23411   3
   7   1   3 24.6701 2.20843   2
  -9  -1  -3 2.14073 0.78415   3
   9  -1   3 1.92993 0.81410   3
  -9  -1  -3 2.30246 0.64933   2
  -9  -1  -3 3.10773 0.68745   1
   9   1   3 2.42420 0.63133   2
   9   1   3 3.15824 0.66956   1
   9   1   3 0.92065 0.71075   3
  11  -1   3 33.0610 3.50256   3
 -11  -1  -3 36.5125 3.48178   3
 -11  -1  -3 37.4885 3.37776   1
 -11  -1  -3 35.3510 3.39104   2
  11   1   3 37.7156 3.41173   1
  11   1   3 32.2120 3.44476   3
 -13  -1  -3 3.52540 0.84300   3
  13  -1   3 2.75182 0.90408   3
 -13  -1  -3 2.12438 0.74060   2
 -13  -1  -3 4.19626 0.84745   1
  13   1   3 4.17891 0.85051   1
 -13   1  -3 2.03493 0.83847   2
  13   1   3 3.00178 0.85759   3
  15  -1   3 6.64889 1.18695   3
 -15  -1  -3 5.82456 1.02922   2
 -15  -1  -3 5.46585 1.06428   1
 -15  -1  -3 8.05690 1.15594   3
  15   1   3 7.12369 1.16295   3
 -15   1  -3 5.34536 1.10086   2
  17  -1   3 8.14915 1.33740   3
 -17  -1  -3 6.39940 1.17620   1
 -17  -1  -3 8.17276 1.21378   3
 -17  -1  -3 6.15314 1.08489   2
 -17   1  -3 6.28071 1.17724   2
  17   1   3 7.82621 1.26572   3
 -19  -1  -3 1.00028 0.76074   2
 -19  -1  -3 0.58237 0.86752   1
 -19  -1  -3 1.88017 0.77209   3
  19  -1   3 0.61545 0.93798   3
  19   1   3 0.98660 0.90322   3
 -19   1  -3 2.12802 0.83732   2
 -19   1  -3 -0.4561 0.55313   3
  19   1   3 -0.0777 0.47161   2
 -21  -1  -3 35.0671 3.48556   1
 -21  -1  -3 39.0084 3.48227   3
 -21  -1  -3 29.5097 3.31106   2
  21  -1   3 37.0764 3.59503   3
 -21   1  -3 29.4818 3.32105   2
 -21   1  -3 31.8203 3.41136   3
  21   1   3 30.7729 3.30629   2
  21   1   3 33.6315 3.51911   3
 -23  -1  -3 -0.4169 0.50860   3
  23  -1   3 0.78289 1.12141   3
 -23  -1  -3 1.12181 0.89302   2
 -23  -1  -3 1.54717 1.05644   1
 -23   1  -3 -0.4867 0.85706   2
  23   1   3 1.95278 1.12983   3
 -25  -1  -3 26.3856 2.97209   2
 -25  -1  -3 24.7745 3.01267   1
 -25  -1  -3 31.0754 3.11749   3
  25  -1   3 35.8911 3.36422   3
  25  -1   3 26.5654 2.95883   2
 -25   1  -3 26.0867 2.91032   2
  25   1   3 28.6013 3.16957   3
 -27  -1  -3 7.36639 1.48527   1
  27  -1   3 7.63724 1.61912   3
 -27  -1  -3 7.60274 1.44301   3
 -27  -1  -3 9.08896 1.34330   2
 -27   1  -3 6.40976 1.30509   2
  27   1   3 7.21701 1.59100   3
 -29  -1  -3 12.8025 1.97192   1
  29  -1   3 14.4289 2.20981   3
 -29  -1  -3 12.7710 1.79778   2
  29   1   3 15.4028 2.20171   3
 -29   1  -3 12.9081 1.78856   2
  31  -1   3 0.67032 1.26769   3
 -31  -1  -3 1.29603 1.20946   1
 -31  -1  -3 0.77147 0.94600   2
  31   1   3 -0.7486 1.16276   3
 -31   1  -3 -0.3568 1.33484   1
 -31   1  -3 -1.3805 0.84310   2
 -33  -1  -3 1.87690 1.24076   1
 -33  -1  -3 1.15620 0.97381   2
  33  -1   3 0.13066 1.35730   3
  33   1   3 -0.0812 1.34325   3
 -33   1  -3 0.89304 1.37694   1
 -33   1  -3 1.57108 1.03197   2
 -35  -1  -3 8.32188 1.69451   1
 -35  -1  -3 6.81671 1.42801   2
  35  -1   3 8.01237 1.93546   3
  35   1   3 7.26776 1.82525   3
 -35   1  -3 5.79733 1.77167   1
 -35   1  -3 6.86146 1.41849   2
 -37  -1  -3 4.33160 1.29791   2
 -37  -1  -3 3.21764 1.55192   1
  37  -1   3 2.98456 1.69450   3
 -37   1  -3 1.38854 1.21276   2
  37   1   3 3.24120 1.69495   3
 -37   1  -3 2.41156 1.65524   1
 -39  -1  -3 11.9719 2.15792   1
  39  -1   3 12.9276 2.49114   3
 -39  -1  -3 12.8367 1.94195   2
  39   1   3 15.3885 2.51262   3
 -39   1  -3 13.1452 1.91484   2
 -39   1  -3 14.3662 2.30089   1
 -41  -1  -3 1.25554 1.53723   1
  41  -1   3 2.14268 1.85296   3
 -41  -1  -3 1.63642 1.20872   2
 -41   1  -3 0.50360 1.14491   2
 -41   1  -3 1.20024 1.68498   1
  43  -1   3 6.22377 2.35319   3
 -43  -1  -3 10.1735 1.77501   2
 -43  -1  -3 7.24299 2.10669   1
 -43   1  -3 10.7201 2.21704   1
 -43   1  -3 8.78222 1.66512   2
 -45  -1  -3 0.79102 1.25534   2
 -45  -1  -3 -0.0712 1.65920   1
 -45   1  -3 1.14305 1.26310   2
 -45   1  -3 -0.5755 1.71073   1
 -47  -1  -3 -0.2182 1.80714   1
 -47  -1  -3 2.25496 1.47697   2
 -47   1  -3 1.50791 1.31461   2
 -47   1  -3 0.37717 1.71207   1
 -49  -1  -3 5.76593 2.09353   1
 -49  -1  -3 4.60354 1.66405   2
 -49   1  -3 5.30576 2.06450   1
 -49   1  -3 3.88574 1.49293   2
 -51  -1  -3 2.70410 1.66073   2
 -51  -1  -3 2.12104 2.13279   1
 -51   1  -3 -1.0268 1.40545   2
 -51   1  -3 -0.6260 1.88945   1
 -53  -1  -3 3.19675 2.07159   1
 -53  -1  -3 2.27619 1.60585   2
 -53   1  -3 3.13277 1.48235   2
 -53   1  -3 0.83573 1.90351   1
 -55  -1  -3 1.31700 2.12498   1
 -55  -1  -3 3.02728 1.65527   2
 -55   1  -3 -0.5456 1.40162   2
 -55   1  -3 0.82646 2.11130   1
 -57  -1  -3 1.98547 1.60222   2
 -57  -1  -3 4.10143 2.33320   1
 -57   1  -3 2.99547 1.47414   2
 -57   1  -3 2.22381 2.19425   1
 -59  -1  -3 -0.0688 1.53457   2
 -59  -1  -3 0.36571 2.08214   1
 -59   1  -3 -0.2666 1.99766   1
 -59   1  -3 0.53334 1.50222   2
 -61  -1  -3 0.25763 1.63420   2
 -61  -1  -3 -1.0069 2.18565   1
 -61   1  -3 -0.0860 2.15122   1
 -61   1  -3 -2.6135 1.42689   2
 -60  -2   3 2.08475 1.74356   2
 -60  -2   3 0.33975 2.08368   1
 -60   2   3 -2.6524 1.91852   1
 -60   2   3 0.14499 1.34638   2
 -58  -2   3 6.86149 2.35080   1
 -58  -2   3 8.01914 1.98734   2
 -58   2   3 3.53903 2.09756   1
 -58   2   3 5.59576 1.51250   2
 -56  -2   3 -2.9931 1.81336   1
 -56  -2   3 -1.0636 1.52171   2
 -56   2   3 2.31058 1.99334   1
 -56   2   3 0.12466 1.23414   2
 -54  -2   3 9.49300 2.41718   1
 -54  -2   3 5.12972 1.78530   2
 -54   2   3 4.78185 2.06578   1
 -54   2   3 5.04399 1.49138   2
 -52  -2   3 0.69726 1.83105   1
 -52  -2   3 2.28873 1.53478   2
 -52   2   3 1.74842 1.21463   2
 -52   2   3 3.47987 1.96610   1
 -50  -2   3 3.64952 1.97600   1
 -50  -2   3 4.27017 1.67013   2
 -50   2   3 4.41396 2.04507   1
 -50   2   3 4.36413 1.35131   2
 -48  -2   3 12.1868 2.12235   2
 -48  -2   3 10.3364 2.37146   1
 -48   2   3 11.8961 1.81030   2
 -48   2   3 13.3419 2.54623   1
 -46  -2   3 0.30387 1.32566   2
 -46  -2   3 0.74575 1.71023   1
 -46   2   3 -0.2847 1.01909   2
 -46   2   3 -0.5045 1.56416   1
 -44  -2   3 8.73876 2.27214   1
 -44  -2   3 17.1864 2.27805   2
 -44   2   3 12.6245 2.40570   1
 -44   2   3 16.5316 1.98185   2
 -42  -2   3 1.27551 1.51849   1
 -42  -2   3 1.62582 1.26711   2
 -42   2   3 2.04891 1.65334   1
 -42   2   3 0.42048 0.94939   2
 -40  -2   3 7.78284 1.91656   1
 -40  -2   3 11.7204 1.80077   2
 -40   2   3 11.2222 2.07208   1
 -40   2   3 9.03727 1.48093   2
 -38  -2   3 3.32418 1.20861   2
 -38  -2   3 0.89680 1.36760   1
 -38   2   3 0.37277 0.84931   2
 -38   2   3 1.10329 1.45165   1
 -36  -2   3 11.0800 1.94602   1
 -36  -2   3 9.13997 1.61988   2
 -36   2   3 10.2214 1.45591   2
 -36   2   3 10.5333 1.99732   1
 -34  -2   3 18.6856 2.89008   1
 -34  -2   3 28.0601 2.86610   2
  34  -2  -3 21.9939 2.78446   2
 -34   2   3 27.0099 2.60794   2
 -34   2   3 27.6946 3.00877   1
 -32  -2   3 8.13831 1.40185   2
 -32  -2   3 6.67152 1.54878   1
  32  -2  -3 6.99565 1.24111   2
 -32   2   3 8.18944 1.65062   1
 -32   2   3 8.19513 1.17370   2
 -30  -2   3 29.8179 3.23997   3
 -30  -2   3 30.0614 3.11916   2
 -30  -2   3 27.2065 3.21994   1
 -30   2   3 28.8295 2.92027   2
 -30   2   3 30.3281 3.29448   1
 -28  -2   3 4.25622 1.02149   2
 -28  -2   3 2.27916 0.95869   3
  28  -2  -3 0.67537 0.58691   2
 -28  -2   3 4.56902 1.21740   1
 -28   2   3 2.77746 0.74330   2
 -28   2   3 3.34477 1.28134   1
 -26  -2   3 13.7645 2.00221   1
 -26  -2   3 14.7556 1.83915   2
 -26   2   3 15.3930 1.65173   2
 -26   2   3 16.0878 2.13047   1
 -24  -2   3 12.6594 1.88889   1
 -24  -2   3 13.2946 1.71049   2
 -24  -2   3 14.0204 1.86591   3
 -24   2   3 14.2715 1.93969   1
 -24   2   3 13.0433 1.52625   2
 -22  -2   3 24.4631 3.05890   1
 -22  -2   3 34.6986 3.14071   3
 -22  -2   3 28.4239 2.95974   2
 -22   2   3 28.7002 3.11141   1
 -22   2   3 27.6733 2.80340   2
 -20  -2   3 19.9562 2.42432   1
 -20  -2   3 21.2396 2.31455   2
  20   2  -3 22.0012 2.46409   1
 -20   2   3 24.8118 2.17246   2
  20   2  -3 19.1633 2.25880   2
 -18  -2   3 8.63206 1.29295   2
 -18  -2   3 10.2544 1.47238   1
  18   2  -3 8.26214 1.39686   1
  18   2  -3 8.78515 1.23770   2
 -18   2   3 10.1151 1.35065   3
 -18   2   3 9.59552 1.09072   2
 -16  -2   3 30.0709 3.12229   2
 -16  -2   3 29.3876 3.21451   1
  16   2  -3 34.2429 3.24339   1
 -16   2   3 32.3424 2.96516   2
 -16   2   3 31.6602 3.20218   3
 -14  -2   3 1.34318 0.89693   1
 -14  -2   3 1.52054 0.74288   2
 -14   2   3 1.32309 0.42081   2
  14   2  -3 0.94408 0.80397   1
  14   2  -3 -0.2278 0.47943   2
 -14   2   3 0.96938 0.63782   3
 -12  -2   3 0.14001 0.80552   1
 -12  -2   3 0.26745 0.69002   2
  12   2  -3 -0.2491 0.56672   2
 -12   2   3 0.30590 0.36097   2
  12   2  -3 0.38578 0.76786   1
 -10  -2   3 0.29559 0.69021   2
 -10  -2   3 0.16023 0.82397   1
  10   2  -3 0.52501 0.52980   2
  10   2  -3 0.79150 0.81842   1
  -8  -2   3 7.37444 1.20136   1
  -8  -2   3 8.50231 1.11489   2
   8   2  -3 8.70448 1.22992   1
  -8   2   3 6.50948 0.79068   2
  -6  -2   3 9.94364 1.40308   1
  -6  -2   3 9.11287 1.26284   2
   6   2  -3 9.30832 1.35214   1
  -6   2   3 9.79971 0.96882   2
  -4  -2   3 3.96118 1.07852   1
  -4  -2   3 5.21490 0.96023   2
   4  -2  -3 3.14425 0.62464   2
   4   2  -3 2.95143 0.98132   1
  -4   2   3 5.52094 0.56893   2
  -2  -2   3 68.8775 7.11567   1
   2  -2  -3 85.1330 6.91594   2
  -2  -2   3 77.0116 7.03914   2
   2   2  -3 74.9087 7.01258   2
  -2   2   3 72.3790 6.94861   1
   0  -2  -3 62.0054 4.97628   2
   0  -2  -3 49.5800 5.00005   1
   0  -2   3 55.2652 5.23145   1
   0   2   3 62.9252 4.95353   2
   0   2  -3 49.6729 5.04966   2
   0   2   3 44.8824 4.97919   1
   2  -2   3 77.7845 6.85239   1
   2  -2   3 66.2157 6.76489   3
  -2  -2  -3 71.1493 6.66818   1
   2   2   3 82.7010 6.61537   2
   2   2   3 73.3662 6.69211   3
   2   2   3 65.7339 6.62584   1
  -4  -2  -3 5.92748 1.03133   3
  -4  -2  -3 7.05204 0.82105   2
   4  -2   3 4.75169 1.05553   3
  -4  -2  -3 3.84644 0.83863   1
   4   2   3 5.30845 0.84429   3
   4   2   3 5.13768 0.79046   1
  -4   2  -3 4.47144 1.02086   3
   4   2   3 7.61894 0.81311   2
  -6  -2  -3 10.8657 1.13400   2
   6  -2   3 8.89932 1.30269   3
  -6  -2  -3 11.1074 1.30191   3
  -6  -2  -3 6.62274 1.11099   1
   6   2   3 11.3685 1.15999   2
   6   2   3 10.6364 1.17836   3
  -6   2  -3 8.90000 1.33203   3
   6   2   3 9.80106 1.11786   1
  -8  -2  -3 8.82897 1.04292   2
  -8  -2  -3 7.61292 1.11603   3
   8  -2   3 7.91532 1.17096   3
  -8  -2  -3 6.66809 1.00869   1
  -8   2  -3 7.98029 1.19406   3
   8   2   3 8.03801 1.03840   3
   8   2   3 8.48106 1.00957   2
   8   2   3 6.29960 0.94614   1
 -10  -2  -3 0.01795 0.66600   3
 -10  -2  -3 0.94820 0.67577   2
  10  -2   3 0.65617 0.72375   3
 -10  -2  -3 1.49495 0.66797   1
  10   2   3 0.20445 0.57401   3
  10   2   3 0.82897 0.56506   1
  10   2   3 0.26118 0.55168   2
 -10   2  -3 0.52942 0.76816   3
  12  -2   3 -0.5029 0.72134   3
 -12  -2  -3 0.04877 0.66609   3
 -12  -2  -3 0.64482 0.69050   2
 -12  -2  -3 1.11165 0.67614   1
  12   2   3 0.91673 0.63070   1
 -12   2  -3 -0.3248 0.74284   3
  12   2   3 0.56168 0.65147   3
  12   2   3 0.44796 0.57959   2
  14  -2   3 -0.0201 0.78653   3
 -14  -2  -3 1.50909 0.74787   3
 -14  -2  -3 1.06435 0.71135   1
 -14  -2  -3 0.83688 0.66554   2
  14   2   3 1.59491 0.73972   1
  14   2   3 0.24748 0.68810   3
 -14   2  -3 0.59913 0.80286   3
  14   2   3 1.49000 0.67750   2
 -16  -2  -3 27.3199 3.25126   2
 -16  -2  -3 35.9861 3.40047   3
 -16  -2  -3 32.7739 3.29835   1
  16  -2   3 38.4334 3.53695   3
 -16   2  -3 35.7122 3.42307   3
  16   2   3 27.2791 3.26342   1
  16   2   3 38.2892 3.43208   3
  16   2   3 33.0601 3.29933   2
 -18  -2  -3 10.3677 1.38241   2
  18  -2   3 8.42737 1.51092   3
 -18  -2  -3 11.9980 1.42151   1
 -18  -2  -3 9.27447 1.39202   3
 -18   2  -3 12.1788 1.45970   2
  18   2   3 10.5783 1.40014   1
 -18   2  -3 9.28799 1.38761   3
  18   2   3 7.64789 1.38194   3
 -20  -2  -3 23.5776 2.55054   3
 -20  -2  -3 27.5394 2.52640   1
 -20  -2  -3 23.8220 2.44012   2
  20  -2   3 16.8976 2.54727   3
 -20   2  -3 27.0344 2.50827   2
  20   2   3 27.2688 2.55028   1
  20   2   3 18.2066 2.54515   3
 -22  -2  -3 25.9953 2.88922   3
  22  -2   3 20.1773 3.01749   3
 -22  -2  -3 29.6337 2.84015   2
 -22  -2  -3 33.0185 2.89803   1
  22   2   3 32.1116 2.90843   1
  22   2   3 21.4456 2.89806   3
 -22   2  -3 31.4019 2.89275   2
  24  -2   3 10.8888 1.82349   3
 -24  -2  -3 14.5113 1.71968   1
 -24  -2  -3 11.3422 1.63013   2
 -24  -2  -3 12.4834 1.73548   3
  24   2   3 10.6209 1.78303   3
 -24   2  -3 12.9054 1.62983   2
  26  -2   3 16.7542 2.19083   3
 -26  -2  -3 12.4888 1.88545   1
 -26  -2  -3 13.5910 1.85213   2
  26   2   3 17.6630 2.25820   3
 -26   2  -3 13.8203 1.84208   2
  28  -2   3 0.55866 1.16998   3
 -28  -2  -3 2.18184 0.97610   2
 -28  -2  -3 3.97104 1.17603   1
 -28  -2  -3 2.06788 0.96350   3
  28   2   3 3.16676 1.30630   3
 -28   2  -3 2.44246 0.94388   2
 -30  -2  -3 31.0037 3.22263   1
 -30  -2  -3 30.5497 3.30053   3
 -30  -2  -3 28.6737 3.14214   2
  30  -2   3 29.7939 3.49602   3
  30   2   3 28.3228 3.35340   3
 -30   2  -3 29.1821 3.09283   2
  32  -2   3 5.15837 1.68920   3
 -32  -2  -3 8.04007 1.42632   2
 -32  -2  -3 7.45853 1.52024   1
  32   2   3 5.45512 1.64601   3
 -32   2  -3 8.66485 1.40036   2
 -34  -2  -3 28.4324 3.04924   1
  34  -2   3 18.6747 3.22733   3
 -34  -2  -3 28.8528 2.93896   2
 -34   2  -3 30.7295 2.89066   2
  34   2   3 22.9807 3.19866   3
 -36  -2  -3 12.5935 1.80193   2
 -36  -2  -3 9.69888 1.91157   1
  36  -2   3 6.00375 2.05243   3
  36   2   3 10.6434 2.12173   3
 -36   2  -3 12.0052 1.71265   2
 -38  -2  -3 0.94616 1.15217   2
 -38  -2  -3 0.26951 1.36626   1
  38  -2   3 0.91253 1.64835   3
 -38   2  -3 0.33930 1.53519   1
 -38   2  -3 1.50379 1.09811   2
 -40  -2  -3 9.36396 1.61863   2
 -40  -2  -3 7.93311 1.84666   1
  40  -2   3 4.16259 1.98113   3
 -40   2  -3 7.46582 1.54612   2
 -40   2  -3 6.63066 1.92673   1
  42  -2   3 2.05047 1.94512   3
 -42  -2  -3 0.75524 1.57053   1
 -42  -2  -3 1.62059 1.37703   2
 -42   2  -3 1.09896 1.65694   1
 -42   2  -3 0.91291 1.19437   2
 -44  -2  -3 17.1280 2.30498   2
 -44  -2  -3 13.4169 2.41229   1
  44  -2   3 11.6049 2.71326   3
 -44   2  -3 10.8318 2.43936   1
 -44   2  -3 14.4385 2.07613   2
 -46  -2  -3 2.41129 1.69310   1
 -46  -2  -3 2.82658 1.52647   2
 -46   2  -3 -0.7793 1.19631   2
 -46   2  -3 3.03273 1.82918   1
 -48  -2  -3 11.9509 2.17265   2
 -48  -2  -3 14.4488 2.57740   1
 -48   2  -3 9.93654 2.49909   1
 -48   2  -3 12.8205 2.05028   2
 -50  -2  -3 3.95988 1.71421   2
 -50  -2  -3 4.01853 2.00797   1
 -50   2  -3 4.58831 2.07352   1
 -50   2  -3 4.18596 1.58942   2
 -52  -2  -3 0.34155 1.52470   2
 -52  -2  -3 0.81008 1.91089   1
 -52   2  -3 3.07532 1.98576   1
 -52   2  -3 2.55832 1.39992   2
 -54  -2  -3 4.83060 1.79654   2
 -54  -2  -3 5.09452 2.23788   1
 -54   2  -3 4.55930 1.60088   2
 -54   2  -3 4.52634 2.24018   1
 -56  -2  -3 -1.8654 2.05875   1
 -56  -2  -3 -0.0159 1.46385   2
 -56   2  -3 0.36251 1.31354   2
 -56   2  -3 -0.9697 1.85964   1
 -58  -2  -3 4.56520 2.36724   1
 -58  -2  -3 8.86668 2.02448   2
 -58   2  -3 3.18530 2.23557   1
 -58   2  -3 6.49110 1.70106   2
 -60  -2  -3 -1.4422 1.62966   2
 -60  -2  -3 1.65907 2.21743   1
 -60   2  -3 -2.1311 1.94831   1
 -60   2  -3 -0.1328 1.39493   2
 -59  -3   3 2.82219 2.37018   1
 -59  -3   3 4.14714 1.87720   2
 -59   3   3 0.49978 2.01801   1
 -57  -3   3 0.88020 1.72448   2
 -57  -3   3 0.45821 2.09459   1
 -57   3   3 -0.2426 1.92599   1
 -55  -3   3 2.76705 1.78539   2
 -55  -3   3 2.27311 2.21283   1
 -55   3   3 2.37690 2.07409   1
 -55   3   3 2.11202 1.27917   2
 -53  -3   3 3.35088 2.08182   1
 -53  -3   3 5.98489 1.92829   2
 -53   3   3 7.69569 2.30450   1
 -53   3   3 8.64811 1.52151   2
 -51  -3   3 1.39189 1.92914   1
 -51  -3   3 2.50990 1.57918   2
 -51   3   3 2.32382 1.84479   1
 -51   3   3 1.96517 1.18991   2
 -49  -3   3 17.2881 3.10766   1
 -49  -3   3 19.1209 2.87006   2
 -49   3   3 21.1834 3.13948   1
 -49   3   3 22.1071 2.48185   2
 -47  -3   3 7.73787 1.78677   2
 -47  -3   3 4.77074 1.94865   1
 -47   3   3 5.06804 1.28278   2
 -47   3   3 3.43104 1.87236   1
 -45  -3   3 15.5651 2.37479   2
 -45  -3   3 15.3468 2.70275   1
 -45   3   3 15.1262 2.64542   1
 -45   3   3 16.0590 2.04045   2
 -43  -3   3 3.08911 1.73017   1
 -43  -3   3 4.70757 1.57473   2
 -43   3   3 5.21968 1.18646   2
 -43   3   3 2.11212 1.68369   1
 -41  -3   3 3.57555 1.42938   2
 -41  -3   3 2.75607 1.62063   1
 -41   3   3 3.23357 1.05070   2
 -41   3   3 3.08161 1.75990   1
 -39  -3   3 7.58808 1.92075   1
 -39  -3   3 9.94764 1.74902   2
 -39   3   3 8.06374 1.88631   1
 -39   3   3 8.26500 1.34564   2
 -37  -3   3 1.72339 1.18640   2
 -37  -3   3 1.88820 1.47695   1
 -37   3   3 -0.3843 1.44801   1
 -37   3   3 2.42587 0.90122   2
 -35  -3   3 19.3689 2.40810   2
 -35  -3   3 17.2548 2.52968   1
 -35   3   3 17.0804 2.03130   2
 -35   3   3 18.4287 2.62947   1
 -33  -3   3 12.3749 1.83453   2
 -33  -3   3 8.90574 2.15301   3
 -33  -3   3 13.3078 2.13322   1
 -33   3   3 12.5254 2.08719   1
 -33   3   3 13.6360 1.55650   2
 -31  -3   3 55.4062 5.63215   3
 -31  -3   3 57.1246 5.52308   2
 -31  -3   3 59.5537 5.68359   1
 -31   3   3 54.3408 5.28721   2
 -31   3   3 56.2633 5.66434   1
 -29  -3   3 23.5320 2.75290   2
 -29  -3   3 26.0391 2.92067   1
 -29   3   3 23.7689 2.46095   2
 -27  -3   3 13.9622 2.17667   3
 -27  -3   3 20.2452 2.22760   2
 -27  -3   3 20.6282 2.39582   1
 -27   3   3 20.1158 1.94809   2
 -25  -3   3 37.5680 4.23006   1
 -25  -3   3 50.0438 4.26384   3
 -25  -3   3 41.3876 4.09828   2
 -25   3   3 36.1474 3.85547   2
 -23  -3   3 5.57742 1.37634   1
 -23  -3   3 6.69608 1.21025   3
 -23  -3   3 6.54657 1.23810   2
 -23   3   3 5.93027 0.90592   2
 -21  -3   3 72.9834 6.78151   1
 -21  -3   3 72.3503 6.73436   3
 -21  -3   3 64.0987 6.65936   2
 -21   3   3 72.1962 6.48119   2
 -19  -3   3 2.11615 1.11950   1
 -19  -3   3 1.51267 0.91624   2
 -19   3   3 1.61068 0.56666   2
 -17  -3   3 59.8614 5.87166   1
 -17  -3   3 64.0914 5.82968   2
 -17   3   3 60.1278 5.90697   3
 -17   3   3 60.2721 5.59236   2
 -15  -3   3 50.0519 5.04474   1
 -15  -3   3 51.7253 4.95310   2
  15   3  -3 51.7844 5.07969   1
 -15   3   3 52.2592 4.95200   3
 -13  -3   3 45.7033 4.50179   2
 -13  -3   3 46.6367 4.62740   1
  13   3  -3 40.6613 4.55928   1
 -13   3   3 51.1006 4.48443   3
 -11  -3   3 109.597 10.2773   1
 -11  -3   3 117.095 10.2404   2
  11   3  -3 105.903 10.2792   1
  -9  -3   3 21.2477 2.68918   1
  -9  -3   3 25.1767 2.58202   2
  -9   3   3 26.5678 2.43900   3
  -9   3   3 23.9987 2.31317   2
   9   3  -3 20.1436 2.66484   1
   9   3  -3 24.8395 2.50954   2
  -7  -3   3 252.122 24.3672   2
  -7  -3   3 245.995 24.4288   1
  -7   3   3 279.761 24.2176   2
   7   3  -3 297.958 24.3755   2
  -5  -3   3 42.5081 4.01681   2
   5  -3  -3 39.2957 3.83130   2
  -5  -3   3 33.3389 4.04745   1
   5   3  -3 38.4221 3.90400   2
  -5   3   3 43.3708 3.77303   2
  -5   3   3 42.2590 3.92430   1
   5   3  -3 45.8159 4.18075   1
   3  -3  -3 236.955 21.6124   2
  -3  -3   3 231.075 21.8060   1
  -3  -3   3 227.216 21.7232   2
  -3   3   3 237.057 21.6675   1
   3   3  -3 253.176 21.7101   2
   3   3  -3 263.427 21.8421   1
  -3   3   3 232.608 21.5729   2
  -1  -3   3 37.6889 4.39886   1
  -1  -3   3 44.0392 4.28161   2
   1  -3  -3 42.8946 4.08820   2
  -1   3   3 41.7244 4.11326   3
   1   3  -3 44.8259 4.18464   2
  -1   3   3 47.6336 4.05178   2
   1   3  -3 53.2602 4.49335   1
  -1   3   3 39.3516 4.16426   1
   1  -3   3 32.7349 3.85985   3
  -1  -3  -3 36.5886 3.82342   1
  -1  -3  -3 44.1743 3.76421   2
   1  -3   3 32.6918 4.06415   1
  -1   3  -3 42.4285 3.82360   2
   1   3   3 40.4755 3.69874   3
   1   3   3 48.0811 3.72016   2
   1   3   3 38.5516 3.84974   1
  -1   3  -3 35.2395 4.01561   1
  -3  -3  -3 164.736 16.8933   1
   3  -3   3 161.195 17.0196   1
  -3  -3  -3 196.425 16.8641   2
   3   3   3 216.215 16.8113   3
  -5  -3  -3 41.9596 3.94668   3
   5  -3   3 43.9470 3.94609   3
  -5  -3  -3 39.9284 3.86119   2
   5   3   3 41.3981 3.77205   3
   5   3   3 40.5219 3.81235   2
   5   3   3 40.5815 3.92642   1
  -5   3  -3 32.9985 4.05496   1
  -7  -3  -3 295.692 25.2644   3
   7  -3   3 304.680 25.2821   3
  -7  -3  -3 271.809 25.2414   1
  -7  -3  -3 244.495 25.2076   2
   7   3   3 290.663 25.2344   1
  -7   3  -3 233.137 25.3079   1
  -7   3  -3 304.859 25.3106   3
   7   3   3 303.532 25.1874   3
   7   3   3 262.633 25.1931   2
  -9  -3  -3 24.0515 2.36730   3
  -9  -3  -3 25.2604 2.31375   2
   9  -3   3 20.6721 2.38900   3
  -9  -3  -3 25.0919 2.38819   1
   9   3   3 21.8117 2.31232   1
  -9   3  -3 24.4750 2.42428   3
  -9   3  -3 22.3188 2.47716   1
   9   3   3 19.6424 2.21578   3
   9   3   3 22.3476 2.26555   2
 -11  -3  -3 145.297 13.5664   1
 -11  -3  -3 151.683 13.5653   2
  11  -3   3 138.157 13.6054   3
 -11  -3  -3 147.261 13.5897   3
  11   3   3 156.508 13.5456   2
  11   3   3 165.008 13.5659   1
 -11   3  -3 140.590 13.6185   3
 -13  -3  -3 51.2604 4.74371   2
 -13  -3  -3 48.9711 4.75889   1
  13  -3   3 49.1809 4.80270   3
 -13  -3  -3 51.9614 4.77063   3
  13   3   3 50.2508 4.70136   1
  13   3   3 50.3799 4.70926   2
  13   3   3 47.1540 4.68815   3
 -13   3  -3 47.9855 4.78079   3
 -15  -3  -3 57.1733 4.77569   3
 -15  -3  -3 41.1432 4.62145   2
  15  -3   3 50.7827 4.81503   3
 -15  -3  -3 43.2046 4.64383   1
  15   3   3 47.2055 4.63549   2
  15   3   3 50.2338 4.68991   3
  15   3   3 49.9775 4.67043   1
 -15   3  -3 49.6374 4.74483   3
 -17  -3  -3 64.6889 6.28424   2
 -17  -3  -3 63.5365 6.29586   1
  17  -3   3 65.8397 6.46337   3
 -17  -3  -3 75.5766 6.40055   3
 -17   3  -3 70.2124 6.39677   3
  17   3   3 70.7404 6.34826   3
  17   3   3 56.1368 6.24317   1
 -19  -3  -3 0.68037 0.81399   3
 -19  -3  -3 2.13172 0.97329   1
 -19  -3  -3 1.53149 0.83031   2
  19  -3   3 0.90770 0.99984   3
  19   3   3 1.00220 0.89064   1
  19   3   3 0.56983 0.84844   3
 -21  -3  -3 82.4855 6.88536   3
 -21  -3  -3 57.2110 6.69646   2
  21  -3   3 77.2135 6.96525   3
 -21  -3  -3 62.6488 6.73337   1
  21   3   3 81.8706 6.90224   3
  21   3   3 67.2821 6.75617   1
 -23  -3  -3 6.41421 1.21052   2
  23  -3   3 4.18733 1.32117   3
 -23  -3  -3 6.59110 1.25095   3
 -23  -3  -3 7.45025 1.31427   1
 -23   3  -3 7.13028 1.22427   2
  23   3   3 4.87451 1.28734   3
 -25  -3  -3 44.4055 4.26457   1
 -25  -3  -3 45.0162 4.24212   2
 -25  -3  -3 40.8677 4.29381   3
  25   3   3 37.1785 4.31349   3
 -25   3  -3 45.2091 4.18404   2
 -27  -3  -3 25.1145 2.65234   1
 -27  -3  -3 22.9990 2.59532   2
  27   3   3 20.7399 2.79585   3
 -27   3  -3 23.0095 2.52618   2
 -29  -3  -3 29.2900 2.95591   1
  29  -3   3 18.5023 3.06780   3
 -29  -3  -3 27.9790 2.84968   2
  29   3   3 23.4954 3.01601   3
 -29   3  -3 29.0347 2.81938   2
 -31  -3  -3 51.5813 5.51502   2
 -31  -3  -3 55.0799 5.61565   3
 -31  -3  -3 58.3068 5.57408   1
  31  -3   3 50.8985 5.89233   3
 -31   3  -3 64.6425 5.49691   2
 -33  -3  -3 11.9456 2.21894   3
 -33  -3  -3 12.2006 1.92264   1
  33  -3   3 10.2134 2.22875   3
 -33  -3  -3 9.99138 1.78951   2
 -33   3  -3 12.6997 1.71555   2
 -35  -3  -3 13.7125 2.12168   2
  35  -3   3 14.7310 2.69753   3
 -35  -3  -3 17.5562 2.39225   1
 -35   3  -3 17.6193 2.10158   2
  37  -3   3 -0.2076 1.58805   3
 -37  -3  -3 0.96676 1.19423   2
 -37  -3  -3 1.90003 1.38504   1
 -37   3  -3 0.27079 1.02035   2
 -39  -3  -3 9.68767 1.69282   2
 -39  -3  -3 7.00628 1.86511   1
  39  -3   3 4.27610 2.00074   3
 -39   3  -3 7.44611 1.47962   2
 -41  -3  -3 3.92405 1.50750   2
 -41  -3  -3 5.67526 1.79559   1
  41  -3   3 3.00402 1.95352   3
 -41   3  -3 3.11534 1.27304   2
 -43  -3  -3 2.04453 1.74567   1
 -43  -3  -3 3.74640 1.48138   2
  43  -3   3 1.60979 2.02027   3
 -43   3  -3 2.63021 1.79566   1
 -43   3  -3 2.52538 1.28191   2
 -45  -3  -3 14.8465 2.35335   2
 -45  -3  -3 13.8946 2.55085   1
 -45   3  -3 17.8459 2.25823   2
 -45   3  -3 13.3919 2.69693   1
 -47  -3  -3 4.50002 1.70823   2
 -47  -3  -3 4.58806 1.91553   1
 -47   3  -3 2.87223 1.41614   2
 -47   3  -3 4.20742 2.13669   1
 -49  -3  -3 21.6241 3.18633   1
 -49  -3  -3 20.0912 2.88661   2
 -49   3  -3 22.4126 2.68908   2
 -49   3  -3 14.9336 3.10043   1
 -51  -3  -3 2.23779 2.00849   1
 -51  -3  -3 0.92992 1.64911   2
 -51   3  -3 3.71825 2.07782   1
 -51   3  -3 1.81079 1.32513   2
 -53  -3  -3 5.17004 1.86483   2
 -53  -3  -3 6.08234 2.23806   1
 -53   3  -3 5.03610 2.25801   1
 -53   3  -3 6.61364 1.61945   2
 -55  -3  -3 0.69096 2.06435   1
 -55  -3  -3 0.25551 1.62491   2
 -55   3  -3 4.48768 1.49397   2
 -55   3  -3 2.17333 1.98838   1
 -57  -3  -3 0.70029 1.74102   2
 -57  -3  -3 2.37147 2.22373   1
 -57   3  -3 -0.2823 1.28250   2
 -57   3  -3 -0.1496 2.03387   1
 -59  -3  -3 4.75934 2.44244   1
 -59  -3  -3 3.97816 1.91917   2
 -59   3  -3 -0.8153 1.98276   1
 -59   3  -3 3.21357 1.50655   2
 -58  -4   3 6.64482 2.51614   1
 -58  -4   3 7.89981 2.14321   2
 -58   4   3 7.64952 2.45229   1
 -56  -4   3 0.25622 2.14811   1
 -56  -4   3 1.17308 1.82113   2
 -56   4   3 -0.4209 1.82545   1
 -54  -4   3 12.7782 2.93532   1
 -54  -4   3 20.8441 2.83987   2
 -54   4   3 12.1405 2.74242   1
 -52  -4   3 1.84556 2.09510   1
 -52  -4   3 3.18749 1.84809   2
 -52   4   3 2.95150 1.93676   1
 -50  -4   3 10.8452 2.18498   2
 -50  -4   3 7.98141 2.40664   1
 -50   4   3 9.73054 1.58510   2
 -50   4   3 7.36738 2.31667   1
 -48  -4   3 14.7932 2.70927   1
 -48  -4   3 15.5863 2.52512   2
 -48   4   3 13.4025 1.90290   2
 -48   4   3 13.3352 2.59430   1
 -46  -4   3 2.45802 1.82812   1
 -46  -4   3 4.64877 1.79567   2
 -46   4   3 5.86014 1.97876   1
 -46   4   3 5.24475 1.21027   2
 -44  -4   3 42.1651 4.46777   2
 -44  -4   3 39.2386 4.57053   1
 -44   4   3 39.4041 4.63677   1
 -44   4   3 38.7751 3.97290   2
 -42  -4   3 3.73434 1.56044   2
 -42  -4   3 2.19296 1.81003   1
 -42   4   3 4.46324 1.90252   1
 -42   4   3 3.59644 1.07687   2
 -40  -4   3 49.1603 4.95791   2
 -40  -4   3 47.6723 5.20499   1
 -40   4   3 45.9017 5.16717   1
 -40   4   3 45.8502 4.57300   2
 -38  -4   3 2.93254 1.45612   2
 -38  -4   3 0.17687 1.43507   1
 -38   4   3 1.74110 0.89074   2
 -38   4   3 2.29162 1.59200   1
 -36  -4   3 23.9726 2.96510   2
 -36  -4   3 23.2399 3.18216   1
 -36   4   3 25.9662 2.61728   2
 -34  -4   3 38.4281 3.97521   2
 -34  -4   3 35.8098 4.05931   3
 -34  -4   3 34.0762 4.07679   1
 -34   4   3 38.8951 3.64764   2
 -32  -4   3 20.6457 2.64506   3
 -32  -4   3 21.4353 2.82968   1
 -32  -4   3 25.8171 2.69798   2
 -32   4   3 20.3314 2.25386   2
 -30  -4   3 103.955 9.84784   2
 -30  -4   3 107.625 9.97463   1
 -30   4   3 102.695 9.56623   2
 -28  -4   3 1.81083 1.05800   3
 -28  -4   3 4.19373 1.26047   2
 -28  -4   3 4.65753 1.43189   1
 -28   4   3 3.85109 0.81426   2
 -26  -4   3 154.106 13.7274   3
 -26  -4   3 150.433 13.7533   1
 -26  -4   3 137.411 13.6497   2
 -26   4   3 147.826 13.4049   2
 -24  -4   3 32.8885 3.32254   2
 -24  -4   3 30.6663 3.29814   3
 -24  -4   3 30.5541 3.48328   1
 -24   4   3 30.3272 3.00045   2
 -22  -4   3 110.517 10.2709   1
 -22  -4   3 106.978 10.1723   2
 -22  -4   3 113.155 10.1751   3
 -22   4   3 105.510 9.92046   2
 -20  -4   3 108.271 11.3751   2
 -20  -4   3 142.809 11.4179   3
 -20  -4   3 114.954 11.4447   1
 -20   4   3 121.285 11.1533   2
 -18  -4   3 31.7403 3.58590   1
 -18  -4   3 34.7087 3.46898   2
 -16  -4   3 100.701 10.0738   1
 -16  -4   3 107.595 10.0294   2
 -16   4   3 112.947 9.80560   2
 -14  -4   3 3.52020 1.05749   2
 -14  -4   3 2.16276 1.17678   1
 -14   4   3 2.30302 0.73168   3
 -14   4   3 1.51849 0.63918   2
 -12  -4   3 144.711 14.2488   2
 -12  -4   3 165.873 14.3804   1
 -12   4   3 160.790 14.0664   2
 -12   4   3 151.437 14.1531   3
 -10  -4   3 64.4726 6.03271   1
 -10  -4   3 58.1994 5.86580   2
 -10   4   3 57.5801 5.68910   3
 -10   4   3 62.3497 5.63823   2
  10   4  -3 73.6698 6.88342   1
  -8  -4   3 187.126 16.7254   2
  -8  -4   3 172.143 16.7985   1
  -8   4   3 188.515 16.6596   1
   8   4  -3 193.943 16.8303   1
  -8   4   3 174.865 16.5324   3
  -8   4   3 182.745 16.5078   2
  -6  -4   3 129.376 13.9083   2
  -6   4   3 151.632 13.7521   2
   6   4  -3 167.958 14.1039   1
  -6   4   3 169.421 13.7571   3
  -6   4   3 153.091 13.8917   1
   6   4  -3 138.139 13.8678   2
  -4  -4   3 58.3413 5.49757   2
   4  -4  -3 57.3076 5.33225   2
  -4  -4   3 46.4688 5.57385   1
  -4   4   3 58.7997 5.22236   2
  -4   4   3 59.5610 5.15880   3
   4   4  -3 56.5002 5.36241   2
   4   4  -3 48.5160 5.53628   1
  -4   4   3 57.8131 5.40117   1
  -2  -4   3 196.439 19.4376   2
  -2   4   3 210.336 19.3983   1
   2   4  -3 205.590 19.3831   2
  -2   4   3 218.942 19.2844   2
   2   4  -3 239.574 19.6110   1
   0  -4  -3 17.9474 1.72061   2
   0  -4   3 10.3194 1.67570   3
   0  -4   3 9.49472 2.20074   1
   0  -4  -3 12.1187 1.89148   1
   0   4  -3 9.90173 1.99483   1
   0   4   3 15.7603 1.49217   2
   0   4  -3 17.4738 1.74568   2
   0   4   3 12.7788 1.77870   1
  -2  -4  -3 249.864 21.9326   1
   2  -4   3 218.309 21.7945   3
   2  -4   3 280.256 22.1621   1
  -2  -4  -3 211.036 21.8062   2
  -2   4  -3 268.504 22.0708   1
  -2   4  -3 238.080 21.8625   2
   2   4   3 229.146 21.7722   2
   2   4   3 252.133 21.8896   1
  -4  -4  -3 53.9529 5.29634   1
  -4  -4  -3 50.4716 5.10762   2
   4  -4   3 51.1916 5.09162   3
  -4   4  -3 55.6217 5.16796   2
   4   4   3 58.6188 5.07792   2
  -4   4  -3 58.6372 5.45072   1
   4   4   3 54.4950 5.21132   1
   6  -4   3 137.998 14.3440   3
  -6  -4  -3 166.200 14.4766   1
  -6  -4  -3 164.455 14.3934   3
  -6  -4  -3 160.355 14.3986   2
  -6   4  -3 141.296 14.3740   2
   6   4   3 163.416 14.3483   2
  -6   4  -3 170.723 14.6012   1
   6   4   3 165.274 14.4338   1
  -8  -4  -3 163.573 15.3747   3
  -8  -4  -3 146.321 15.3645   2
  -8  -4  -3 171.520 15.4648   1
   8  -4   3 179.664 15.4100   3
  -8   4  -3 160.294 15.7280   1
  -8   4  -3 175.264 15.4040   2
   8   4   3 170.545 15.3515   2
   8   4   3 162.069 15.2561   3
  -8   4  -3 187.158 15.4366   3
   8   4   3 173.287 15.4269   1
  10  -4   3 74.5910 6.42625   3
 -10  -4  -3 65.1433 6.45423   1
 -10  -4  -3 61.9225 6.36100   2
 -10  -4  -3 68.3424 6.36130   3
  10   4   3 65.5486 6.24854   3
  10   4   3 68.7163 6.40162   1
 -10   4  -3 70.2165 6.44092   3
  10   4   3 68.4681 6.33683   2
 -12  -4  -3 145.535 15.1416   1
 -12  -4  -3 171.257 15.1532   3
 -12  -4  -3 164.464 15.1477   2
  12  -4   3 170.872 15.2026   3
 -12   4  -3 178.803 15.2097   3
  12   4   3 157.803 15.1315   1
  12   4   3 188.332 15.4111   2
  12   4   3 156.242 15.0508   3
 -14  -4  -3 3.00213 1.04642   1
  14  -4   3 3.05507 1.02323   3
 -14  -4  -3 2.58546 0.94144   2
 -14  -4  -3 2.75939 0.86582   3
  14   4   3 3.65000 0.98602   1
 -14   4  -3 3.27047 1.02932   3
  14   4   3 2.95184 0.75130   3
 -16  -4  -3 139.177 11.2911   3
 -16  -4  -3 115.896 11.2154   2
  16  -4   3 134.289 11.3640   3
 -16  -4  -3 110.004 11.2149   1
  16   4   3 118.235 11.1969   1
  16   4   3 112.426 11.1655   3
 -18  -4  -3 32.3717 3.33860   2
 -18  -4  -3 28.1948 3.29415   3
 -18  -4  -3 34.6743 3.38150   1
  18  -4   3 30.9708 3.46576   3
  18   4   3 38.6071 3.34887   1
  20  -4   3 112.158 11.1499   3
 -20  -4  -3 134.238 11.0812   2
 -20  -4  -3 109.218 11.0451   3
 -20  -4  -3 124.835 11.0511   1
  22  -4   3 113.929 10.9912   3
 -22  -4  -3 113.635 10.8248   2
 -22  -4  -3 120.531 10.8570   1
 -22  -4  -3 118.345 10.8992   3
 -24  -4  -3 33.1430 3.47275   1
  24  -4   3 30.2287 3.66027   3
 -24  -4  -3 34.8961 3.51825   3
 -24  -4  -3 31.3096 3.41361   2
 -26  -4  -3 156.861 14.5638   1
  26  -4   3 171.548 14.8390   3
 -26  -4  -3 143.716 14.5089   2
 -26  -4  -3 169.530 14.6585   3
 -26   4  -3 146.751 14.4559   2
 -28  -4  -3 4.40663 1.33319   1
  28  -4   3 2.73274 1.60593   3
 -28  -4  -3 1.17252 1.11557   3
 -28  -4  -3 5.52842 1.34308   2
 -28   4  -3 4.30215 1.18375   2
  30  -4   3 111.963 10.2164   3
 -30  -4  -3 100.345 9.82524   2
 -30  -4  -3 100.005 9.83862   1
 -30   4  -3 104.344 9.71745   2
 -32  -4  -3 25.5685 2.68407   2
 -32  -4  -3 25.0279 2.79294   1
  32  -4   3 14.9744 2.91824   3
 -32  -4  -3 16.2561 2.59121   3
 -32   4  -3 27.2931 2.59184   2
 -34  -4  -3 28.8560 4.09091   3
  34  -4   3 34.0947 4.45369   3
 -34  -4  -3 40.8735 4.10438   2
 -34  -4  -3 46.2899 4.29611   1
 -34   4  -3 47.0918 4.02165   2
  36  -4   3 20.2874 3.33286   3
 -36  -4  -3 25.5021 2.93735   2
 -36  -4  -3 23.8966 3.05496   1
 -36   4  -3 24.8387 2.71879   2
 -38  -4  -3 3.20030 1.58951   1
  38  -4   3 1.47574 1.83318   3
 -38  -4  -3 1.38275 1.37675   2
 -38   4  -3 1.23637 1.11812   2
 -40  -4  -3 50.3926 5.25623   2
  40  -4   3 43.9368 5.65560   3
 -40  -4  -3 53.0839 5.40009   1
 -40   4  -3 52.4220 5.01312   2
 -42  -4  -3 1.15207 1.47289   2
 -42  -4  -3 3.06404 1.74943   1
 -42   4  -3 2.37196 1.27355   2
 -44  -4  -3 40.0682 4.39347   2
 -44  -4  -3 39.7018 4.50791   1
 -44   4  -3 36.3992 4.05328   2
 -46  -4  -3 3.35113 1.88516   1
 -46  -4  -3 3.49399 1.67737   2
 -46   4  -3 2.78163 1.35596   2
 -48  -4  -3 16.3680 2.89331   1
 -48  -4  -3 18.6485 2.72091   2
 -48   4  -3 15.9551 2.30156   2
 -48   4  -3 14.3960 2.87650   1
 -50  -4  -3 10.6711 2.28091   2
 -50  -4  -3 12.4639 2.58918   1
 -50   4  -3 9.68755 1.87821   2
 -50   4  -3 9.65720 2.51338   1
 -52  -4  -3 3.28212 2.04539   1
 -52  -4  -3 2.20078 1.77953   2
 -52   4  -3 3.61457 1.47569   2
 -52   4  -3 3.06745 2.07122   1
 -54  -4  -3 19.8110 2.95965   2
 -54  -4  -3 19.3818 3.23144   1
 -54   4  -3 12.1043 2.89900   1
 -54   4  -3 14.5539 2.29804   2
 -56  -4  -3 -1.0754 1.67911   2
 -56  -4  -3 -1.4376 1.99292   1
 -56   4  -3 0.87444 1.94073   1
 -56   4  -3 -0.5350 1.29049   2
 -58  -4  -3 8.67373 2.29875   2
 -58  -4  -3 7.87429 2.75162   1
 -58   4  -3 8.40864 2.57946   1
 -58   4  -3 8.01828 1.81132   2
 -55  -5   3 -0.6846 1.78242   2
 -55  -5   3 1.88149 2.29350   1
 -55   5   3 2.63987 2.07161   1
 -53  -5   3 17.4699 2.97555   2
 -53  -5   3 15.0587 3.07622   1
 -53   5   3 17.0049 3.03668   1
 -51  -5   3 2.06898 2.07418   1
 -51  -5   3 1.06344 1.65906   2
 -51   5   3 -0.7562 1.80508   1
 -49  -5   3 31.9598 4.38095   1
 -49  -5   3 32.6502 4.01415   2
 -49   5   3 35.8167 4.19768   1
 -47  -5   3 1.41262 1.81779   1
 -47  -5   3 4.96162 1.83866   2
 -47   5   3 3.58437 1.93655   1
 -45  -5   3 33.5746 3.79784   2
 -45  -5   3 31.4136 4.06455   1
 -45   5   3 27.1967 3.85827   1
 -45   5   3 31.1232 3.61109   2
 -43  -5   3 8.93863 2.07857   2
 -43  -5   3 6.63793 2.08622   1
 -43   5   3 5.85393 2.01751   1
 -43   5   3 9.23568 1.36313   2
 -41  -5   3 4.48135 1.85962   1
 -41  -5   3 3.37885 1.65491   2
 -41   5   3 3.66815 1.05361   2
 -41   5   3 3.15157 1.80697   1
 -39  -5   3 24.0696 3.42342   1
 -39  -5   3 25.4213 3.33181   2
 -39   5   3 26.9698 2.74762   2
 -37  -5   3 -0.5710 1.39998   2
 -37  -5   3 0.74773 1.55665   1
 -37   5   3 0.44659 0.82491   2
 -35  -5   3 26.7627 3.43096   2
 -35  -5   3 31.2611 3.66139   1
 -35   5   3 30.9932 3.04005   2
 -33  -5   3 7.85328 1.95694   1
 -33  -5   3 6.38519 1.71349   2
 -33   5   3 7.70352 1.19003   2
 -31  -5   3 66.5147 6.62700   2
 -31  -5   3 69.6120 6.69588   1
 -31  -5   3 60.8374 6.52576   3
 -31   5   3 69.2676 6.20091   2
 -29  -5   3 25.4857 3.05302   3
 -29  -5   3 29.9004 3.17444   2
 -29  -5   3 25.2469 3.29884   1
 -29   5   3 25.7943 2.66329   2
 -27  -5   3 43.0615 4.23844   2
 -27  -5   3 38.6230 4.32907   1
 -27  -5   3 39.3188 4.14099   3
 -27   5   3 39.6845 3.84514   2
 -25  -5   3 77.9814 7.66373   2
 -25  -5   3 82.6768 7.63465   3
 -25  -5   3 74.3426 7.77179   1
 -25   5   3 81.1642 7.36119   2
 -23  -5   3 4.53306 1.11133   3
 -23  -5   3 5.21388 1.50105   1
 -23  -5   3 6.18745 1.43269   2
 -23   5   3 6.04054 0.98942   2
 -21  -5   3 104.026 10.6323   3
 -21  -5   3 121.889 10.8802   1
 -21  -5   3 115.655 10.7514   2
 -21   5   3 119.677 10.4655   2
 -19  -5   3 10.4223 1.63619   2
 -19  -5   3 7.07671 1.75352   1
 -19  -5   3 8.25233 1.30308   3
 -19   5   3 9.46429 1.20405   2
 -17  -5   3 86.0031 8.57998   1
 -17  -5   3 88.0350 8.45152   2
 -17  -5   3 88.1785 8.32050   3
 -17   5   3 93.2988 8.19273   2
 -15  -5   3 44.1776 4.33458   2
 -15  -5   3 39.7146 4.44980   1
 -15   5   3 42.8298 4.02302   2
 -13  -5   3 38.8137 4.50993   1
 -13  -5   3 46.1559 4.40781   2
 -13   5   3 44.0524 4.09708   2
 -11  -5   3 142.041 13.4135   1
 -11  -5   3 148.168 13.3202   2
 -11   5   3 130.931 13.3788   1
 -11   5   3 152.470 13.0954   3
 -11   5   3 141.565 13.0504   2
  -9  -5   3 35.8702 3.59212   2
  -9  -5   3 29.0539 3.72652   1
  -9   5   3 34.5477 3.28562   2
  -9   5   3 34.4711 3.25422   3
  -9   5   3 33.9905 3.50270   1
  -7  -5   3 266.643 24.1674   1
  -7  -5   3 256.984 24.0388   2
  -7   5   3 256.516 23.7550   3
  -7   5   3 266.404 23.8220   2
  -7   5   3 275.182 24.0067   1
  -5  -5   3 40.6105 4.03495   2
  -5  -5   3 28.3445 4.20498   1
  -5   5   3 35.8933 3.88398   1
  -5   5   3 42.9512 3.67459   2
  -3  -5   3 280.726 25.1938   2
  -3  -5   3 259.000 25.2946   1
   3  -5  -3 286.970 25.0782   2
  -3   5   3 274.826 24.9735   2
  -3   5   3 280.781 25.1291   1
   1  -5  -3 73.7948 6.52157   2
  -1  -5   3 56.4265 6.89542   1
  -1   5   3 72.9220 6.40015   2
  -1   5   3 66.3314 6.59147   1
  -1  -5  -3 74.7148 6.12335   2
   1  -5   3 51.1417 6.37780   1
  -1  -5  -3 64.6222 6.27491   1
   1  -5   3 60.6221 5.90922   3
   1   5   3 68.0211 5.95961   2
   1   5   3 62.1519 6.18590   1
  -3  -5  -3 315.315 24.5216   1
   3  -5   3 259.969 24.2256   3
   3  -5   3 283.905 24.6416   1
  -3  -5  -3 233.750 24.3152   2
   3   5   3 249.950 24.2634   2
   3   5   3 280.072 24.4274   1
  -5  -5  -3 30.2372 4.11018   1
   5  -5   3 45.2931 3.82899   3
  -5  -5  -3 41.7530 3.96939   2
   5   5   3 34.8699 4.08400   1
   5   5   3 39.5220 3.81746   2
  -7  -5  -3 260.162 23.5957   2
  -7  -5  -3 274.538 23.5264   3
  -7  -5  -3 239.024 23.6402   1
   7  -5   3 270.450 23.5361   3
   7   5   3 252.290 23.6166   1
   9  -5   3 31.9548 3.37300   3
  -9  -5  -3 36.1980 3.45934   2
  -9  -5  -3 33.9809 3.62951   1
  -9  -5  -3 34.0518 3.35713   3
   9   5   3 34.0696 3.53895   1
  11  -5   3 129.172 13.7788   3
 -11  -5  -3 162.400 13.8681   2
 -11  -5  -3 136.465 13.7575   3
 -11  -5  -3 161.453 13.9160   1
  11   5   3 165.991 13.8787   1
 -11   5  -3 157.317 13.8248   3
 -13  -5  -3 41.3315 4.33346   3
 -13  -5  -3 43.1652 4.45469   1
 -13  -5  -3 45.0281 4.41615   2
  13  -5   3 45.8622 4.46039   3
  13   5   3 50.8508 4.51183   1
  15  -5   3 45.9842 4.26516   3
 -15  -5  -3 36.9285 4.15206   2
 -15  -5  -3 38.5795 4.17378   1
 -15  -5  -3 43.3433 4.13040   3
 -17  -5  -3 88.2734 8.82504   3
 -17  -5  -3 88.7653 8.88325   2
 -17  -5  -3 97.4744 8.91053   1
  17  -5   3 103.436 8.96548   3
 -19  -5  -3 10.6468 1.68320   2
 -19  -5  -3 12.0141 1.67070   3
  19  -5   3 11.0212 1.76951   3
 -19  -5  -3 10.7172 1.71714   1
 -21  -5  -3 130.934 12.2885   1
 -21  -5  -3 147.795 12.3344   3
 -21  -5  -3 107.574 12.1823   2
  21  -5   3 140.671 12.4343   3
  23  -5   3 4.83776 1.47377   3
 -23  -5  -3 3.65688 1.16969   3
 -23  -5  -3 5.89019 1.35705   2
 -23  -5  -3 7.39085 1.46886   1
 -25  -5  -3 82.7694 8.07489   2
 -25  -5  -3 87.4679 8.09707   1
 -25  -5  -3 80.9715 8.08904   3
  25  -5   3 87.0641 8.34497   3
 -27  -5  -3 45.1459 4.36546   2
  27  -5   3 35.2295 4.55480   3
 -27  -5  -3 51.3053 4.41536   1
 -27  -5  -3 37.5902 4.29606   3
 -29  -5  -3 32.9574 3.31022   1
 -29  -5  -3 22.9895 3.15425   3
 -29  -5  -3 33.9854 3.34834   2
  29  -5   3 25.1458 3.56780   3
 -29   5  -3 29.9040 3.14286   2
 -31  -5  -3 77.5761 7.29231   1
 -31  -5  -3 74.5205 7.35855   3
  31  -5   3 72.8308 7.60787   3
 -31  -5  -3 64.9819 7.16945   2
 -31   5  -3 80.8330 7.14040   2
  33  -5   3 6.68372 2.13401   3
 -33  -5  -3 5.56167 1.63930   2
 -33  -5  -3 6.80628 1.68741   1
 -33   5  -3 7.87077 1.56023   2
  35  -5   3 29.6310 4.02451   3
 -35  -5  -3 26.7429 3.44973   2
 -35  -5  -3 31.0558 3.59980   1
 -35   5  -3 32.5462 3.38656   2
 -37  -5  -3 1.12330 1.48020   1
 -37  -5  -3 0.76137 1.47615   2
  37  -5   3 -1.1199 1.81089   3
 -37   5  -3 0.80552 1.16961   2
 -39  -5  -3 24.3193 3.25334   1
 -39  -5  -3 21.4720 3.12452   2
 -39   5  -3 26.3447 2.89127   2
 -41  -5  -3 6.27965 1.97950   1
 -41  -5  -3 6.03563 1.86778   2
 -41   5  -3 6.69533 1.51594   2
 -43  -5  -3 7.02869 2.15961   1
 -43  -5  -3 9.05332 2.01573   2
 -43   5  -3 8.93989 1.72950   2
 -45  -5  -3 29.8252 3.79335   2
 -45  -5  -3 33.6219 4.13314   1
 -45   5  -3 32.8228 3.55921   2
 -47  -5  -3 3.31765 1.92305   1
 -47  -5  -3 3.78639 1.88412   2
 -47   5  -3 5.35015 1.49364   2
 -49  -5  -3 29.2051 3.83972   2
 -49  -5  -3 32.6795 4.11423   1
 -49   5  -3 29.1619 3.33719   2
 -51  -5  -3 -0.4377 1.95099   1
 -51  -5  -3 2.70101 1.86679   2
 -51   5  -3 0.89643 1.33688   2
 -51   5  -3 1.22197 1.99000   1
 -53  -5  -3 14.3445 2.82778   2
 -53  -5  -3 18.4996 3.12991   1
 -53   5  -3 17.4714 2.36277   2
 -53   5  -3 13.5072 2.98707   1
 -55  -5  -3 0.64735 1.87029   2
 -55  -5  -3 0.66967 2.20214   1
 -55   5  -3 3.74800 1.53389   2
 -55   5  -3 4.94854 2.35193   1
 -52  -6   3 3.45051 2.05120   2
 -52  -6   3 1.99247 2.19123   1
 -52   6   3 4.32251 2.22407   1
 -50  -6   3 2.86931 1.97761   2
 -50  -6   3 7.01310 2.36439   1
 -50   6   3 4.59258 2.22178   1
 -48  -6   3 15.6064 2.91949   1
 -48  -6   3 11.5028 2.55420   2
 -48   6   3 14.2002 2.85075   1
 -46  -6   3 1.38030 1.98019   1
 -46  -6   3 0.17438 1.75520   2
 -46   6   3 2.48366 1.93209   1
 -44  -6   3 21.9362 3.26125   1
 -44  -6   3 18.4813 2.99028   2
 -42  -6   3 4.38062 1.87658   2
 -42  -6   3 4.44988 1.96647   1
 -40  -6   3 23.8005 3.26860   1
 -40  -6   3 19.0980 3.02993   2
 -38  -6   3 0.75236 1.77239   1
 -38  -6   3 3.06174 1.64255   2
 -38   6   3 3.76921 1.06195   2
 -36  -6   3 8.12314 2.13955   1
 -36  -6   3 7.61013 1.90691   2
 -36   6   3 6.89680 1.20823   2
 -34  -6   3 11.1763 2.19485   2
 -34  -6   3 10.3710 2.21964   1
 -34   6   3 11.6087 1.49111   2
 -32  -6   3 9.75652 2.01512   2
 -32  -6   3 7.02899 2.08595   1
 -32   6   3 9.04673 1.28806   2
 -30  -6   3 44.1836 5.04699   1
 -30  -6   3 51.5377 5.04479   2
 -30   6   3 46.2364 4.50779   2
 -28  -6   3 5.30272 1.81382   1
 -28  -6   3 5.16089 1.59847   2
 -28   6   3 5.54929 1.04719   2
 -28   6   3 4.69555 1.04069   2
 -26  -6   3 69.9202 6.54621   1
 -26  -6   3 60.0354 6.31995   2
 -26  -6   3 58.9565 6.20765   3
 -26   6   3 64.6369 5.97483   2
 -26   6   3 65.8510 5.97088   2
 -24  -6   3 23.4122 2.74773   2
 -24  -6   3 18.3820 2.40619   3
 -24  -6   3 22.4542 2.94034   1
 -24   6   3 20.5170 2.21430   2
 -22  -6   3 39.7436 4.82962   1
 -22  -6   3 47.8189 4.75215   2
 -22  -6   3 44.6242 4.51506   3
 -22   6   3 47.6217 4.35504   2
 -20  -6   3 24.3703 3.33749   1
 -20  -6   3 28.9241 3.21547   2
 -20  -6   3 27.4054 2.94522   3
 -20   6   3 28.8487 2.79885   2
 -18  -6   3 15.0888 2.51929   1
 -18  -6   3 17.7716 1.98935   3
 -18  -6   3 15.5832 2.31376   2
 -18   6   3 16.9784 1.86768   2
 -16  -6   3 55.3818 5.13018   2
 -16  -6   3 49.0035 5.18764   1
 -16  -6   3 45.0392 4.77302   3
 -16   6   3 53.2555 4.72368   2
 -14  -6   3 0.80949 1.48687   1
 -14  -6   3 0.74131 0.61755   3
 -14  -6   3 -0.8077 1.21462   2
 -14   6   3 1.52703 0.71733   2
 -12  -6   3 79.0711 7.27280   2
 -12  -6   3 66.4986 6.90378   3
 -12  -6   3 83.8863 7.45980   1
 -12   6   3 75.2332 7.19453   3
 -12   6   3 77.3660 6.93012   2
 -10  -6   3 19.8395 2.88605   1
 -10  -6   3 21.7224 2.71319   2
 -10   6   3 22.4388 2.18545   2
 -10   6   3 19.8099 2.03468   3
  -8  -6   3 47.5672 5.22187   1
  -8  -6   3 55.0450 5.15014   2
  -8   6   3 48.7157 4.72273   2
  -6  -6   3 55.2528 5.06338   2
  -6  -6   3 39.3424 5.16618   1
  -6   6   3 51.2291 4.68846   2
  -4  -6   3 38.7297 3.95128   2
  -4  -6   3 27.4790 4.19217   1
  -4   6   3 39.8616 3.61394   2
  -2  -6   3 154.764 14.3776   1
   2  -6  -3 159.295 14.0527   2
  -2   6   3 145.804 13.9131   2
   0  -6  -3 4.65486 1.20285   2
   0  -6   3 -4.5354 1.64184   1
   0  -6   3 -0.6877 0.53542   3
   2  -6   3 189.455 15.6470   1
  -2  -6  -3 165.090 15.2675   2
   2  -6   3 147.646 15.0252   3
  -2  -6  -3 177.429 15.3994   1
  -4  -6  -3 45.3181 4.12671   2
   4  -6   3 38.7993 3.81665   3
  -4  -6  -3 38.2132 4.28620   1
  -6  -6  -3 54.6783 5.58257   2
  -6  -6  -3 56.9695 5.81525   1
   6  -6   3 59.4251 5.41485   3
  -8  -6  -3 50.0626 5.33583   2
  -8  -6  -3 50.7290 5.47549   1
   8  -6   3 59.9042 5.23621   3
 -10  -6  -3 20.7191 2.73181   2
  10  -6   3 28.6182 2.66927   3
 -10  -6  -3 21.0810 2.90751   1
 -10  -6  -3 23.9064 2.56431   3
 -12  -6  -3 79.6854 7.92039   1
  12  -6   3 91.5425 7.80330   3
 -12  -6  -3 71.1459 7.81041   2
 -12  -6  -3 84.2643 7.73163   3
 -14  -6  -3 2.23033 1.18652   2
 -14  -6  -3 0.33605 1.29364   1
  14  -6   3 1.79181 0.97638   3
 -14  -6  -3 1.65041 0.82198   3
 -16  -6  -3 55.1886 5.47291   1
 -16  -6  -3 53.7618 5.28931   3
  16  -6   3 60.5690 5.44525   3
 -16  -6  -3 46.8479 5.31947   2
 -18  -6  -3 17.3683 2.35000   2
  18  -6   3 15.6396 2.31180   3
 -18  -6  -3 17.9200 2.15910   3
 -18  -6  -3 20.4963 2.44825   1
  20  -6   3 26.8818 3.26304   3
 -20  -6  -3 30.6377 3.25685   2
 -20  -6  -3 26.8510 3.09530   3
 -20  -6  -3 30.0244 3.27913   1
 -22  -6  -3 43.8001 4.81890   3
 -22  -6  -3 48.7764 4.86250   2
 -22  -6  -3 50.8353 4.90618   1
  22  -6   3 48.5787 5.07908   3
 -24  -6  -3 21.1824 2.77549   2
  24  -6   3 24.9933 3.08258   3
 -24  -6  -3 19.6486 2.81199   1
 -24  -6  -3 22.9953 2.75365   3
  26  -6   3 79.2575 7.09210   3
 -26  -6  -3 70.5523 6.84399   3
 -26  -6  -3 65.3588 6.76382   1
 -26  -6  -3 59.1839 6.75008   2
 -28  -6  -3 4.88463 1.51385   2
  28  -6   3 2.98228 1.78047   3
 -28  -6  -3 5.31608 1.56996   1
  30  -6   3 58.3350 5.57047   3
 -30  -6  -3 43.1814 5.04285   2
 -30  -6  -3 45.7628 5.10772   1
  32  -6   3 4.68734 2.16599   3
 -32  -6  -3 9.40645 1.98086   2
 -32  -6  -3 14.9890 2.23577   1
 -32   6  -3 13.6702 1.88511   2
 -34  -6  -3 14.2474 2.40925   1
 -34  -6  -3 13.4022 2.34716   2
 -34   6  -3 13.8357 2.10288   2
 -36  -6  -3 8.98638 2.01348   1
 -36  -6  -3 5.67339 1.90236   2
 -36   6  -3 10.8074 1.76705   2
 -38  -6  -3 1.75983 1.64879   1
 -38  -6  -3 2.17851 1.64126   2
 -38   6  -3 1.26376 1.31193   2
 -40  -6  -3 27.3608 3.28216   1
 -40  -6  -3 16.9993 2.93786   2
 -40   6  -3 23.2296 2.74806   2
 -42  -6  -3 3.71136 1.83787   1
 -42  -6  -3 0.98683 1.59232   2
 -42   6  -3 1.88312 1.31249   2
 -44  -6  -3 20.9715 3.12364   2
 -44  -6  -3 23.3415 3.28932   1
 -44   6  -3 21.7937 2.75675   2
 -46  -6  -3 3.21793 1.96107   1
 -46  -6  -3 0.22306 1.50675   2
 -46   6  -3 2.00773 1.30828   2
 -48  -6  -3 16.2227 2.94588   1
 -48  -6  -3 15.4360 2.82033   2
 -48   6  -3 16.7011 2.33356   2
 -50  -6  -3 3.36013 1.89029   2
 -50  -6  -3 2.36113 2.17599   1
 -52  -6  -3 3.36953 1.94317   2
 -52  -6  -3 1.34879 2.09591   1
 -47  -7   3 1.45864 1.82434   2
 -47  -7   3 2.98077 2.10943   1
 -47   7   3 0.68092 1.92754   1
 -45  -7   3 5.97046 2.09535   2
 -45  -7   3 6.26946 2.31017   1
 -43  -7   3 0.77254 1.96177   1
 -43  -7   3 2.21557 1.85007   2
 -41  -7   3 7.52910 2.12409   2
 -41  -7   3 9.17540 2.41233   1
 -39  -7   3 13.6352 2.76846   1
 -39  -7   3 17.7827 2.78006   2
 -37  -7   3 2.39167 1.73677   2
 -37  -7   3 4.56308 1.98304   1
 -35  -7   3 21.2850 3.20905   2
 -35  -7   3 27.2436 3.57860   1
 -33  -7   3 2.59053 1.72573   2
 -33  -7   3 2.68401 1.75935   1
 -31  -7   3 13.6009 2.42311   2
 -31  -7   3 14.8846 2.62837   1
 -31   7   3 12.7388 1.74805   2
 -29  -7   3 11.7547 2.48326   1
 -29  -7   3 11.9125 2.24348   2
 -29   7   3 12.1461 1.61045   2
 -27  -7   3 20.0157 3.07383   1
 -27  -7   3 20.3612 2.91487   2
 -25  -7   3 43.6081 4.90464   2
 -25  -7   3 49.6810 5.17981   1
 -23  -7   3 6.26628 1.73883   2
 -23  -7   3 5.19674 1.93184   1
 -21  -7   3 65.4036 6.44250   2
 -21  -7   3 61.3669 6.48897   1
 -19  -7   3 4.63048 1.64554   2
 -19  -7   3 2.36184 0.94044   3
 -19  -7   3 3.53735 1.83718   1
 -19   7   3 3.77887 0.93623   2
 -17  -7   3 27.3556 3.01336   3
 -17  -7   3 32.2543 3.65330   1
 -17  -7   3 29.6598 3.48753   2
 -17   7   3 30.5405 2.96932   2
 -15  -7   3 12.7782 1.70150   3
 -15  -7   3 16.4648 2.55462   1
 -15  -7   3 15.7655 2.36716   2
 -15   7   3 15.5523 1.70939   2
 -13  -7   3 18.3763 2.66774   2
 -13  -7   3 18.1796 2.00495   3
 -13  -7   3 21.8227 2.93857   1
 -11  -7   3 52.8811 5.70331   1
 -11  -7   3 52.0936 5.47008   2
 -11  -7   3 53.5828 4.96662   3
  -9  -7   3 14.7047 2.28354   2
  -9  -7   3 8.91408 2.39880   1
  -9  -7   3 11.7324 1.28413   3
  -7  -7   3 70.1767 7.46553   1
  -7  -7   3 76.1409 7.24100   2
  -5  -7   3 2.82455 2.17934   1
  -5  -7   3 9.11744 1.87531   2
  -3  -7   3 106.136 10.3900   1
  -1  -7   3 50.4925 5.60655   1
   1  -7  -3 50.9440 5.12646   2
  -1  -7  -3 55.4815 5.54828   2
   3  -7   3 109.985 9.74977   3
  -3  -7  -3 101.026 10.1029   2
  -3  -7  -3 108.940 10.2321   1
  -5  -7  -3 8.90940 1.73629   2
   5  -7   3 10.1661 1.20925   3
  -5  -7  -3 3.14515 1.84667   1
  -7  -7  -3 84.8020 7.63134   1
   7  -7   3 73.7755 7.12363   3
  -7  -7  -3 75.4078 7.39461   2
   9  -7   3 14.3896 1.74203   3
  -9  -7  -3 8.74966 2.22829   1
  -9  -7  -3 14.9707 2.11969   2
 -11  -7  -3 53.6878 5.44683   2
 -11  -7  -3 57.5149 5.59780   1
  11  -7   3 53.5307 5.28633   3
 -13  -7  -3 18.7305 2.55792   2
 -13  -7  -3 20.9634 2.75500   1
  13  -7   3 20.1999 2.38985   3
 -13  -7  -3 19.4964 2.21904   3
 -15  -7  -3 15.9349 2.30592   2
  15  -7   3 17.5873 2.21837   3
 -15  -7  -3 18.0710 2.48030   1
 -15  -7  -3 14.5087 1.94914   3
  17  -7   3 38.2276 3.84824   3
 -17  -7  -3 28.6603 3.73375   2
 -17  -7  -3 38.8175 4.03862   1
 -17  -7  -3 33.9298 3.60791   3
 -19  -7  -3 4.43844 1.21751   3
  19  -7   3 5.13231 1.48373   3
 -19  -7  -3 5.12459 1.53532   2
 -19  -7  -3 2.37228 1.59272   1
 -21  -7  -3 57.2759 6.93558   2
  21  -7   3 83.2905 7.18087   3
 -21  -7  -3 69.9003 7.04527   1
 -23  -7  -3 8.44513 1.91938   1
 -23  -7  -3 7.25555 1.81654   2
 -25  -7  -3 48.1398 5.15234   2
 -25  -7  -3 49.8955 5.15744   1
 -27  -7  -3 23.2432 2.97914   1
 -27  -7  -3 19.8132 2.91149   2
 -29  -7  -3 14.5573 2.34080   2
 -29  -7  -3 12.8192 2.35785   1
 -31  -7  -3 11.0708 2.21558   2
 -31  -7  -3 12.4346 2.24595   1
 -33  -7  -3 3.30365 1.71269   2
 -33  -7  -3 3.43506 1.75004   1
 -33   7  -3 4.39218 1.54677   2
 -35  -7  -3 25.5359 3.45215   1
 -35  -7  -3 24.3259 3.42347   2
 -35   7  -3 28.7469 3.15384   2
 -37  -7  -3 2.44998 1.73707   1
 -37  -7  -3 6.87709 1.98890   2
 -37   7  -3 3.88421 1.48675   2
 -39  -7  -3 22.2945 3.17168   2
 -39  -7  -3 19.6797 3.06315   1
 -39   7  -3 21.3790 2.75213   2
 -41  -7  -3 5.27401 2.04728   2
 -41  -7  -3 7.89865 2.11290   1
 -41   7  -3 7.04683 1.64501   2
 -43  -7  -3 1.36703 1.87812   1
 -43  -7  -3 3.97280 1.87954   2
 -43   7  -3 4.38072 1.41744   2
 -45  -7  -3 4.39960 1.98751   2
 -45  -7  -3 4.66517 2.09337   1
 -47  -7  -3 0.01854 1.78714   2
 -47  -7  -3 2.09989 1.99056   1
 -42  -8   3 0.43071 1.94490   2
 -42  -8   3 1.69544 2.05729   1
 -40  -8   3 8.00353 2.39060   2
 -40  -8   3 12.8863 2.65651   1
 -38  -8   3 2.80602 1.92755   2
 -38  -8   3 2.20381 1.95710   1
 -36  -8   3 1.33159 2.04494   1
 -36  -8   3 3.74113 1.98251   2
 -34  -8   3 2.77088 1.89494   2
 -34  -8   3 3.55832 2.04647   1
 -32  -8   3 4.34301 2.14760   1
 -32  -8   3 2.20010 1.81005   2
 -30  -8   3 24.4341 3.49108   1
 -30  -8   3 22.9269 3.33148   2
 -28  -8   3 2.99937 1.85244   2
 -28  -8   3 1.21275 1.89254   1
 -26  -8   3 46.8286 5.05302   1
 -26  -8   3 40.3649 4.93042   2
 -24  -8   3 16.8684 2.71435   2
 -24  -8   3 14.0778 2.73632   1
 -22  -8   3 21.7100 3.15249   1
 -22  -8   3 16.1022 2.77589   2
 -20  -8   3 26.0061 3.35390   2
 -20  -8   3 23.3138 3.46096   1
 -18  -8   3 11.2958 2.41634   1
 -18  -8   3 10.9753 2.34833   2
 -16  -8   3 60.2990 6.44703   2
 -16  -8   3 65.8428 6.64947   1
 -14  -8   3 2.67128 1.68751   2
 -14  -8   3 1.83566 0.71935   3
 -14  -8   3 1.45231 1.89033   1
 -12  -8   3 77.3047 7.41255   1
 -12  -8   3 65.6448 7.09003   2
 -10  -8   3 12.9873 2.84794   1
 -10  -8   3 15.3464 2.52996   2
  -8  -8   3 9.84967 2.65317   1
  -8  -8   3 15.3897 2.46508   2
  -6  -8   3 20.0845 3.38639   1
  -4  -8   3 55.0215 6.08041   1
  -2  -8   3 134.436 12.9051   1
   0  -8  -3 6.21787 1.71966   2
  -2  -8  -3 141.757 13.2748   2
  -4  -8  -3 48.9173 5.12835   2
  -6  -8  -3 29.1474 3.42154   2
  -6  -8  -3 28.4899 3.56306   1
  -8  -8  -3 17.1286 2.69232   1
  -8  -8  -3 15.7977 2.44866   2
 -10  -8  -3 13.3352 2.62074   1
 -10  -8  -3 20.5226 2.61974   2
 -12  -8  -3 69.0899 6.81294   2
 -12  -8  -3 67.1072 6.84516   1
 -14  -8  -3 3.05389 1.56948   2
 -14  -8  -3 2.12305 1.69896   1
 -16  -8  -3 68.6871 6.92512   1
 -16  -8  -3 67.8597 6.86166   2
 -18  -8  -3 14.4291 2.40810   1
 -18  -8  -3 11.9525 2.28151   2
 -20  -8  -3 26.5634 3.45670   1
 -20  -8  -3 31.3037 3.56749   2
 -22  -8  -3 16.9617 2.73960   1
 -22  -8  -3 19.4331 2.71118   2
 -24  -8  -3 14.0002 2.48711   2
 -24  -8  -3 16.0682 2.57653   1
 -26  -8  -3 45.4608 4.92239   1
 -26  -8  -3 42.8549 4.80862   2
 -28  -8  -3 0.78626 1.67260   1
 -28  -8  -3 3.45001 1.67532   2
 -30  -8  -3 19.7588 3.00948   1
 -30  -8  -3 21.5865 3.09686   2
 -32  -8  -3 4.87074 1.88125   1
 -32  -8  -3 1.87986 1.78475   2
 -34  -8  -3 6.92608 2.02614   1
 -34  -8  -3 6.72573 2.03166   2
 -36  -8  -3 4.57635 1.93077   2
 -36  -8  -3 3.53543 1.86196   1
 -36   8  -3 2.89457 1.56122   2
 -38  -8  -3 5.66837 2.12163   2
 -38  -8  -3 5.53111 2.10223   1
 -40  -8  -3 7.16713 2.25514   1
 -40  -8  -3 12.0798 2.47809   2
 -42  -8  -3 2.97512 1.96540   1
 -42  -8  -3 1.09292 1.86918   2
 -35  -9   3 14.6428 2.94568   2
 -35  -9   3 14.4849 2.97329   1
 -33  -9   3 0.29893 2.13963   1
 -33  -9   3 4.81849 2.20289   2
 -31  -9   3 14.2718 2.83527   1
 -31  -9   3 10.9790 2.64772   2
 -29  -9   3 9.02272 2.30638   2
 -29  -9   3 9.80962 2.55292   1
 -27  -9   3 11.8638 2.74426   1
 -27  -9   3 12.7245 2.60176   2
 -25  -9   3 22.5131 3.45164   2
 -25  -9   3 27.3505 3.74405   1
 -23  -9   3 3.80695 2.16094   1
 -23  -9   3 3.55516 2.05313   2
 -21  -9   3 37.3422 4.45939   1
 -21  -9   3 32.9669 4.18191   2
 -19  -9   3 8.77495 2.36158   2
 -19  -9   3 8.35321 2.43497   1
 -17  -9   3 29.3808 3.95125   1
 -17  -9   3 27.0088 3.84532   2
 -15  -9   3 13.7140 2.77699   2
 -15  -9   3 16.7584 2.98822   1
 -13  -9   3 5.20819 2.02802   2
 -13  -9   3 4.30915 2.28007   1
 -11  -9   3 18.7741 3.01478   2
 -11  -9   3 18.2826 3.15005   1
  -9  -9   3 2.01611 2.26843   1
  -7  -9   3 36.4654 4.65091   1
  -5  -9   3 2.02716 2.04249   1
  -3  -9  -3 39.4460 4.38408   2
  -5  -9  -3 3.50758 1.73816   2
  -7  -9  -3 33.7715 3.96053   2
  -9  -9  -3 0.17809 1.76988   1
  -9  -9  -3 2.23554 1.63030   2
 -11  -9  -3 19.2039 2.88988   2
 -11  -9  -3 19.5812 2.97388   1
 -13  -9  -3 7.33454 2.01755   2
 -13  -9  -3 8.07227 2.16680   1
 -15  -9  -3 17.8903 2.90189   1
 -15  -9  -3 17.8607 2.78863   2
 -17  -9  -3 28.6655 3.67771   2
 -17  -9  -3 26.8766 3.62469   1
 -19  -9  -3 7.42448 2.06681   2
 -19  -9  -3 7.17584 2.13163   1
 -21  -9  -3 31.3761 3.81370   1
 -21  -9  -3 31.7190 3.96829   2
 -23  -9  -3 4.85234 1.91937   1
 -23  -9  -3 3.26791 1.86095   2
 -25  -9  -3 31.6674 3.92838   1
 -25  -9  -3 30.8150 3.99964   2
 -27  -9  -3 15.0066 2.62953   1
 -27  -9  -3 11.3954 2.49277   2
 -29  -9  -3 8.52053 2.24243   2
 -29  -9  -3 11.6132 2.41563   1
 -31  -9  -3 12.1775 2.53297   1
 -31  -9  -3 9.03269 2.40249   2
 -33  -9  -3 2.41066 1.86640   2
 -33  -9  -3 5.05982 2.14975   1
 -35  -9  -3 13.9955 2.55649   1
 -35  -9  -3 8.13362 2.41292   2
 -26 -10   3 6.33392 2.34538   2
 -26 -10   3 8.14383 2.55645   1
 -24 -10   3 4.11328 2.22541   2
 -24 -10   3 8.34549 2.51892   1
 -22 -10   3 4.53713 2.28216   2
 -22 -10   3 8.63738 2.52449   1
 -20 -10   3 8.36978 2.62963   2
 -20 -10   3 12.4334 2.68478   1
 -18 -10   3 2.53685 2.18383   1
 -18 -10   3 0.60103 1.94383   2
 -16 -10   3 9.15790 2.43489   2
 -16 -10   3 7.00368 2.56413   1
 -14 -10   3 -0.0967 2.09985   1
 -14 -10   3 3.38809 2.07395   2
 -12 -10   3 10.4920 2.73616   1
 -10 -10   3 4.72051 2.33644   1
  -8 -10   3 9.51794 2.63766   1
  -6 -10  -3 8.04795 2.18208   2
  -8 -10  -3 7.52145 2.20937   2
 -10 -10  -3 6.64272 2.13950   2
 -12 -10  -3 8.32427 2.19136   1
 -12 -10  -3 3.42044 2.14016   2
 -14 -10  -3 2.18351 1.76546   1
 -14 -10  -3 -2.8171 1.65210   2
 -16 -10  -3 9.14891 2.32319   1
 -16 -10  -3 7.89273 2.31828   2
 -18 -10  -3 2.49757 1.76752   1
 -18 -10  -3 -0.4646 1.74765   2
 -20 -10  -3 10.2583 2.40346   1
 -20 -10  -3 11.3938 2.46076   2
 -22 -10  -3 5.24427 2.23321   2
 -22 -10  -3 6.33467 2.16742   1
 -24 -10  -3 6.68761 2.23366   1
 -24 -10  -3 7.29906 2.32187   2
 -26 -10  -3 2.70045 2.05536   2
 -26 -10  -3 4.86234 2.03805   1
 -62   0   4 1.93108 1.53436   2
 -62   0   4 2.25308 2.13438   1
 -60   0   4 13.9565 2.17491   2
 -60   0   4 5.28782 2.44394   1
 -58   0   4 -0.4512 1.34624   2
 -58   0   4 -0.9282 1.92778   1
 -56   0   4 0.54963 1.39708   2
 -56   0   4 2.44011 1.96101   1
 -54   0   4 1.11862 1.37407   2
 -54   0   4 2.94208 1.82875   1
 -52   0   4 26.2666 3.00083   2
 -52   0   4 20.4009 3.39638   1
 -50   0   4 22.8152 3.60618   1
 -50   0   4 31.2299 3.26692   2
 -48   0   4 21.2390 3.23537   1
 -48   0   4 23.2543 2.78403   2
 -46   0   4 18.4699 2.85641   1
 -46   0   4 17.0784 2.33122   2
 -44   0   4 0.69629 1.11850   2
 -44   0   4 -0.7890 1.45188   1
 -42   0   4 14.2211 2.00886   2
 -42   0   4 15.0923 2.43594   1
 -40   0   4 2.28138 1.07383   2
 -40   0   4 0.82212 1.35750   1
 -38   0   4 32.6832 3.25879   2
 -38   0   4 27.7347 3.56629   1
 -36   0   4 53.1256 5.57660   1
 -36   0   4 56.1728 5.32684   2
 -34   0   4 62.2690 6.50685   1
 -34   0   4 68.9727 6.27152   2
 -32   0   4 67.8558 6.01758   2
 -32   0   4 57.9246 6.22100   1
 -30   0   4 2.24269 0.79837   2
 -30   0   4 -0.1798 1.08837   1
 -28   0   4 14.8070 1.71032   2
 -28   0   4 12.9876 2.00053   1
  28   0  -4 14.9162 1.70537   2
 -26   0   4 6.32624 1.06127   2
 -26   0   4 6.11896 1.36314   1
  26   0  -4 6.69458 1.05953   2
 -24   0   4 9.34715 1.53892   3
 -24   0   4 7.69048 1.52202   1
 -24   0   4 9.67184 1.24385   2
 -22   0   4 20.3770 2.42011   1
  22   0  -4 19.2482 2.32658   1
 -22   0   4 22.0120 2.15534   2
  22   0  -4 20.4949 2.14170   2
 -20   0   4 90.8915 8.38370   2
  20   0  -4 93.1672 8.38680   2
  20   0  -4 93.3330 8.52801   1
 -20   0   4 89.0531 8.53211   1
  18   0  -4 413.488 35.8414   2
 -18   0   4 415.596 35.9682   1
 -18   0   4 367.847 35.8275   2
  16   0  -4 10.9384 1.23507   2
 -16   0   4 10.9664 1.27079   2
 -16   0   4 9.79772 1.43040   1
  16   0  -4 10.0258 1.42316   1
  14   0  -4 4.10717 0.89515   1
  14   0  -4 3.98425 0.70233   2
 -14   0   4 4.52247 0.94331   1
 -14   0   4 4.00954 0.70223   2
 -12   0   4 3.85952 0.82587   1
  12   0  -4 3.43428 0.61329   2
 -12   0   4 2.59726 0.58966   2
  12   0  -4 3.70707 0.85579   1
  10   0  -4 103.488 9.54444   1
 -10   0   4 106.087 9.57620   1
   6   0  -4 4.86616 0.73590   1
   6   0  -4 3.78627 0.68292   2
  -6   0   4 2.72067 0.65113   2
   4   0  -4 2.11233 0.59698   1
   4   0  -4 1.96273 0.60268   2
  -4   0   4 1.90409 0.57251   1
  -2   0   4 6.73144 0.86782   1
   2   0  -4 7.17279 0.87590   1
   0   0   4 1185.46 106.778   1
   0   0  -4 1194.07 106.785   1
  -2   0  -4 -1.0330 0.52810   1
   4   0   4 0.48393 1.06769   3
  -4   0  -4 -0.2131 0.97004   3
   6   0   4 9.08271 1.50250   3
  -6   0  -4 11.3710 1.25103   2
  -6   0  -4 8.68772 1.41421   3
  -8   0  -4 15.2266 1.63175   2
   8   0   4 13.4753 1.80757   3
  -8   0  -4 15.0924 1.80402   3
 -10   0  -4 136.385 12.2951   3
  10   0   4 122.501 12.2718   3
 -10   0  -4 143.533 12.1986   2
  12   0   4 3.83963 0.78016   2
 -12   0  -4 4.11658 1.01936   3
 -12   0  -4 4.02811 0.87924   2
  12   0   4 3.43122 0.98192   3
 -14   0  -4 2.66350 0.81513   2
 -14   0  -4 3.78550 0.96628   3
  14   0   4 2.41311 0.78644   2
  14   0   4 2.41658 0.97907   3
 -16   0  -4 10.4168 1.38416   2
  16   0   4 9.99297 1.37104   2
 -16   0  -4 12.1606 1.57409   3
  16   0   4 10.0129 1.54193   3
 -18   0  -4 441.436 39.7207   2
 -18   0  -4 469.092 39.8383   3
  18   0   4 411.974 39.8207   3
 -20   0  -4 93.3627 8.84328   2
  20   0   4 102.666 8.86757   2
  20   0   4 91.1430 9.01051   3
  22   0   4 21.3295 2.37455   2
 -22   0  -4 23.9402 2.43107   3
  22   0   4 21.5064 2.52361   3
 -22   0  -4 18.5155 2.28353   2
 -22   0  -4 16.9025 2.41529   1
 -24   0  -4 11.9141 1.66657   1
  24   0   4 5.94637 1.49892   3
 -24   0  -4 6.86107 1.43658   3
 -24   0  -4 9.72845 1.40712   2
  26   0   4 5.40577 1.42954   3
 -26   0  -4 3.89979 1.10863   2
 -26   0  -4 3.60553 1.36527   1
 -28   0  -4 16.8670 1.90060   2
 -28   0  -4 18.1774 2.19179   1
  28   0   4 10.3683 2.00219   3
  30   0   4 1.08589 1.24639   3
 -30   0  -4 -0.3136 1.15887   1
 -30   0  -4 1.34931 0.98721   2
 -32   0  -4 84.4503 7.93026   1
 -32   0  -4 79.8499 7.76189   2
  34   0   4 56.5768 6.68965   3
 -34   0  -4 77.5683 6.66657   1
 -34   0  -4 68.5941 6.43454   2
 -36   0  -4 53.1633 5.47132   2
 -36   0  -4 58.4289 5.74386   1
  36   0   4 56.8493 5.96039   3
  38   0   4 24.0452 3.55628   3
 -38   0  -4 27.4428 3.10244   2
 -38   0  -4 34.3980 3.50356   1
 -40   0  -4 1.23609 1.19783   2
  40   0   4 0.51361 1.62621   3
 -40   0  -4 0.26228 1.50325   1
  42   0   4 16.9771 2.80891   3
 -42   0  -4 14.4535 2.17348   2
 -42   0  -4 12.4989 2.49159   1
  44   0   4 -0.5324 1.92874   3
 -44   0  -4 0.12030 1.21344   2
 -44   0  -4 -1.1201 1.55263   1
 -46   0  -4 20.5654 3.11345   1
 -46   0  -4 20.3012 2.67215   2
  46   0   4 18.5431 3.28898   3
 -48   0  -4 20.1905 2.68835   2
 -48   0  -4 19.6705 3.15528   1
 -50   0  -4 29.2993 3.89763   1
 -50   0  -4 27.8684 3.45044   2
 -52   0  -4 24.2061 3.55547   1
 -52   0  -4 22.4133 3.03452   2
 -54   0  -4 0.93291 1.39143   2
 -54   0  -4 0.52512 1.97233   1
 -56   0  -4 1.22875 1.59056   2
 -56   0  -4 -1.1852 2.04244   1
 -58   0  -4 -0.9145 2.12838   1
 -58   0  -4 -2.2106 1.26681   2
 -60   0  -4 8.58932 2.75387   1
 -60   0  -4 8.61953 2.07028   2
 -62   0  -4 2.87100 1.79744   2
 -62   0  -4 0.50745 2.23879   1
 -61  -1   4 0.44958 2.00781   1
 -61  -1   4 1.19862 1.61147   2
 -61   1   4 0.00381 1.38146   2
 -61   1   4 -2.4150 1.92304   1
 -59  -1   4 4.12395 2.24795   1
 -59  -1   4 3.11277 1.67182   2
 -59   1   4 2.88057 2.19536   1
 -59   1   4 4.39047 1.56461   2
 -57  -1   4 12.5627 2.24407   2
 -57  -1   4 10.1968 2.66191   1
 -57   1   4 13.2128 2.13707   2
 -57   1   4 10.7460 2.75086   1
 -55  -1   4 26.5113 4.04542   1
 -55  -1   4 36.1320 3.64034   2
 -55   1   4 24.7602 3.97014   1
 -55   1   4 30.1466 3.45993   2
 -53  -1   4 3.01766 1.94264   1
 -53  -1   4 3.48196 1.52031   2
 -53   1   4 5.66353 1.44902   2
 -53   1   4 1.78325 1.88014   1
 -51  -1   4 64.3832 6.12608   2
 -51  -1   4 56.2987 6.38729   1
 -51   1   4 63.2427 6.49326   1
 -51   1   4 57.7406 5.92585   2
 -49  -1   4 -0.2445 1.72279   1
 -49  -1   4 0.34395 1.25906   2
 -49   1   4 0.62104 1.19709   2
 -49   1   4 0.70744 1.77190   1
 -47  -1   4 2.40202 1.33245   2
 -47  -1   4 0.39201 1.60449   1
 -47   1   4 0.89139 1.67960   1
 -47   1   4 2.17533 1.18347   2
 -45  -1   4 8.06832 1.65862   2
 -45  -1   4 7.59097 2.06000   1
 -45   1   4 6.37058 1.95167   1
 -45   1   4 7.18978 1.46727   2
 -43  -1   4 15.6196 2.86613   1
 -43  -1   4 25.5452 2.70154   2
 -43   1   4 17.8128 2.91087   1
 -43   1   4 23.5889 2.51618   2
 -41  -1   4 51.0123 5.88762   1
 -41  -1   4 56.1653 5.68993   2
 -41   1   4 61.6624 5.98577   1
 -41   1   4 61.6433 5.62694   2
 -39  -1   4 7.79083 1.83559   1
 -39  -1   4 11.6629 1.67892   2
 -39   1   4 9.58289 1.49411   2
 -39   1   4 10.9025 1.98731   1
 -37  -1   4 101.994 9.92330   1
 -37  -1   4 98.0943 9.67367   2
 -37   1   4 103.345 9.60005   2
 -37   1   4 112.947 9.96318   1
 -35  -1   4 3.51143 1.13256   2
 -35  -1   4 4.22502 1.47902   1
 -35   1   4 5.39948 1.07502   2
 -35   1   4 4.55931 1.49998   1
 -33  -1   4 25.3804 2.70309   2
 -33  -1   4 24.0667 2.95599   1
 -33   1   4 26.2129 2.64835   2
 -33   1   4 24.3970 3.02278   1
 -31  -1   4 -0.5127 1.01634   1
 -31  -1   4 -0.7458 0.79194   2
  31  -1  -4 -0.0176 0.69612   2
 -31   1   4 -1.0159 1.06442   1
 -31   1   4 -0.7505 0.67569   2
 -29  -1   4 12.0563 1.49572   2
  29  -1  -4 10.8396 1.34804   2
 -29  -1   4 8.67520 1.63641   1
 -29   1   4 10.4497 1.33317   2
 -29   1   4 9.22587 1.70086   1
 -27  -1   4 48.8521 4.60853   1
 -27  -1   4 46.1249 4.35162   2
 -27  -1   4 44.8551 4.56347   3
 -27   1   4 41.5531 4.22673   2
 -27   1   4 44.4548 4.52035   1
 -25  -1   4 12.7995 1.60433   2
 -25  -1   4 11.4195 1.75125   1
 -25  -1   4 14.7642 1.88550   3
  25  -1  -4 14.3902 1.53203   2
  25   1  -4 11.7459 1.57127   2
 -25   1   4 11.4376 1.47989   2
 -25   1   4 12.3146 1.84643   1
 -23  -1   4 597.249 56.5088   1
  23  -1  -4 638.263 56.3577   2
 -23  -1   4 608.369 56.4041   2
 -23   1   4 614.320 56.3357   2
  23   1  -4 650.719 56.4104   2
 -23   1   4 655.381 56.5328   1
 -21  -1   4 1.73069 0.94319   1
  21  -1  -4 1.91249 0.64772   2
 -21  -1   4 1.46311 0.77740   2
 -21   1   4 2.70103 0.60217   2
  21   1  -4 1.40670 0.79859   1
  21   1  -4 0.18124 0.50168   2
 -21   1   4 2.22611 1.02281   1
 -19  -1   4 57.0135 4.67692   2
 -19  -1   4 47.2019 4.75805   1
  19  -1  -4 52.2272 4.58310   2
 -19   1   4 46.4169 4.74317   1
 -19   1   4 44.2440 4.53655   2
 -17  -1   4 32.4712 3.32442   1
  17  -1  -4 32.8109 3.10649   2
 -17  -1   4 30.7791 3.18338   2
 -17   1   4 35.0317 3.37550   1
 -17   1   4 33.2216 3.08328   2
  17   1  -4 33.8354 3.17743   2
  15  -1  -4 5.91804 0.76689   2
 -15  -1   4 5.94469 0.91979   2
 -15  -1   4 6.30222 1.09710   1
  15   1  -4 5.00374 0.87404   2
 -15   1   4 6.01659 0.72795   2
 -15   1   4 6.17845 1.11171   1
 -13  -1   4 29.6851 2.80896   2
 -13  -1   4 29.2223 2.90624   1
  13  -1  -4 30.6416 2.69985   2
 -13   1   4 22.2648 2.86200   1
 -13   1   4 30.1235 2.67781   2
  11  -1  -4 2.91813 0.43823   2
 -11  -1   4 2.36076 0.67486   2
 -11  -1   4 2.74906 0.83102   1
 -11   1   4 1.23376 0.73530   1
  11   1  -4 1.91019 0.68253   2
  11   1  -4 3.72557 0.83385   1
 -11   1   4 2.03967 0.40135   2
   9  -1  -4 21.3700 2.09200   2
  -9  -1   4 22.4176 2.28084   2
  -9  -1   4 23.9559 2.36998   1
   9   1  -4 22.2396 2.25898   2
   9   1  -4 25.5444 2.37132   1
  -9   1   4 23.5097 2.31281   1
  -9   1   4 22.7561 2.10053   2
  -7  -1   4 -0.3660 0.60575   2
  -7  -1   4 0.62436 0.73431   1
   7   1  -4 0.22766 0.61957   2
   7   1  -4 0.99350 0.77105   1
  -7   1   4 0.59775 0.56415   1
  -5  -1   4 1.15554 0.68990   2
  -5  -1   4 0.79169 0.73862   1
   5   1  -4 0.32578 0.77675   1
   5   1  -4 1.39879 0.73753   2
  -3  -1   4 2.61673 0.87887   1
   3   1  -4 3.36105 0.81912   2
   3   1  -4 2.99921 0.90115   1
  -1  -1   4 0.22111 0.88593   1
   1  -1  -4 4.91163 0.55906   2
   1   1  -4 2.79410 0.97354   1
  -1  -1  -4 6.60946 0.82503   2
   1  -1   4 5.72319 1.12711   1
  -1   1  -4 5.90816 1.15363   1
   1   1   4 7.14684 0.83297   2
   3  -1   4 7.63671 1.26477   1
  -3  -1  -4 9.79867 0.91269   1
  -3  -1  -4 9.89204 1.10425   2
   3  -1   4 6.87733 1.46051   3
   3   1   4 6.58864 1.44356   3
  -3   1  -4 8.81271 1.28201   1
   3   1   4 11.4422 1.09836   2
  -5  -1  -4 8.90514 0.92821   1
  -5  -1  -4 8.86211 1.04250   2
   5  -1   4 7.73186 1.39219   3
  -5  -1  -4 6.86664 1.30514   3
   5   1   4 8.81828 1.02912   2
   5   1   4 7.55890 1.34148   3
  -7  -1  -4 0.50582 0.87914   3
  -7  -1  -4 0.47981 0.49909   1
  -7  -1  -4 -0.6600 0.56620   2
   7  -1   4 -0.9016 0.86073   3
   7   1   4 0.83006 0.85301   3
  -7   1  -4 -0.0785 0.09655   3
   7   1   4 -0.2055 0.55318   2
  -9  -1  -4 20.3462 2.09539   2
   9  -1   4 20.8562 2.29769   3
  -9  -1  -4 18.9363 2.06149   1
  -9  -1  -4 22.4837 2.30120   3
   9   1   4 21.9084 2.27065   3
   9   1   4 19.6297 2.10523   2
 -11  -1  -4 2.15980 0.70488   1
 -11  -1  -4 1.83184 0.87534   3
  11  -1   4 1.56917 0.88237   3
 -11  -1  -4 1.28456 0.70648   2
  11   1   4 2.87894 0.83936   3
  11   1   4 1.57637 0.67056   2
 -13  -1  -4 36.7326 3.41557   3
  13  -1   4 30.4013 3.41706   3
 -13  -1  -4 33.4573 3.26898   2
 -13  -1  -4 38.0053 3.33008   1
 -13   1  -4 35.6304 3.32306   2
  13   1   4 28.9251 3.34953   3
  15  -1   4 5.89245 1.21336   3
 -15  -1  -4 6.45407 1.05399   2
 -15  -1  -4 7.37698 1.22386   3
 -15  -1  -4 7.71310 1.10862   1
 -15   1  -4 5.76740 1.11081   2
  15   1   4 6.10622 1.16619   3
 -17  -1  -4 31.5819 3.28116   1
  17  -1   4 35.7894 3.44010   3
 -17  -1  -4 27.7838 3.20694   2
 -17  -1  -4 38.8073 3.39538   3
 -17   1  -4 27.8536 3.24927   2
  17   1   4 33.4964 3.36594   3
 -19  -1  -4 62.3324 5.65574   3
  19  -1   4 55.5779 5.71211   3
 -19  -1  -4 64.0759 5.58180   1
 -19  -1  -4 60.6099 5.53596   2
 -19   1  -4 59.9438 5.56008   2
 -19   1  -4 53.6181 5.59875   3
  19   1   4 54.0920 5.65140   3
 -21  -1  -4 1.98094 0.85529   2
 -21  -1  -4 1.60772 0.88215   3
 -21  -1  -4 1.52476 0.93426   1
  21  -1   4 0.73314 1.06674   3
 -21   1  -4 -0.5627 0.82736   2
 -21   1  -4 0.99688 0.91706   3
  21   1   4 0.74572 0.99465   3
  21   1   4 2.43104 0.80963   2
 -23  -1  -4 644.807 56.4783   1
  23  -1   4 555.807 56.6142   3
 -23  -1  -4 620.461 56.4481   2
  23   1   4 668.849 56.6414   3
 -23   1  -4 645.489 56.4377   2
 -25  -1  -4 13.9901 1.80317   3
  25  -1   4 9.88892 1.84960   3
 -25  -1  -4 11.3131 1.64086   2
 -25  -1  -4 13.0476 1.80175   1
  25   1   4 11.2181 1.81338   3
 -25   1  -4 15.0681 1.71420   2
 -27  -1  -4 36.8940 4.24326   2
 -27  -1  -4 47.9410 4.49888   3
  27  -1   4 47.7758 4.62124   3
 -27  -1  -4 39.3116 4.33910   1
 -27   1  -4 42.3120 4.28945   2
  27   1   4 45.8794 4.58845   3
 -29  -1  -4 12.8075 1.82636   1
  29  -1   4 7.54314 1.77947   3
 -29  -1  -4 11.8899 1.64488   2
 -29   1  -4 10.9647 1.55815   2
  29   1   4 10.6193 1.87109   3
 -31  -1  -4 -0.0257 1.14588   1
 -31  -1  -4 -0.7338 0.88789   2
  31  -1   4 0.73187 1.20961   3
  31   1   4 -0.6451 1.18499   3
 -31   1  -4 0.27842 0.90610   2
  33  -1   4 23.1889 3.02997   3
 -33  -1  -4 23.7029 2.62856   2
 -33  -1  -4 24.7189 2.96147   1
 -33   1  -4 21.4951 2.58392   2
  33   1   4 25.8359 3.12084   3
 -33   1  -4 19.7317 2.90593   1
 -35  -1  -4 5.34430 1.51376   1
  35  -1   4 4.37358 1.75152   3
 -35  -1  -4 2.70027 1.16789   2
  35   1   4 4.04096 1.67863   3
 -35   1  -4 3.80992 1.59619   1
 -35   1  -4 1.90154 1.16403   2
 -37  -1  -4 101.659 9.59788   2
 -37  -1  -4 118.630 9.86211   1
  37  -1   4 94.4129 9.98025   3
 -37   1  -4 100.907 9.84412   1
  37   1   4 105.585 10.0062   3
 -37   1  -4 93.9308 9.54991   2
  39  -1   4 8.32611 2.32372   3
 -39  -1  -4 11.6143 2.08394   1
 -39  -1  -4 10.5882 1.80433   2
  39   1   4 12.8730 2.40552   3
 -39   1  -4 11.4528 2.16838   1
 -39   1  -4 10.6225 1.81866   2
 -41  -1  -4 50.4021 5.36349   2
  41  -1   4 57.8430 5.99346   3
 -41  -1  -4 58.1639 5.67876   1
 -41   1  -4 51.2738 5.63188   1
  41   1   4 58.9533 5.97621   3
 -41   1  -4 47.0675 5.30585   2
  43  -1   4 15.8196 3.14409   3
 -43  -1  -4 21.3129 2.96970   1
 -43  -1  -4 21.5270 2.69525   2
  43   1   4 21.2190 3.23465   3
 -43   1  -4 19.3239 2.56271   2
 -43   1  -4 23.1740 3.12339   1
  45  -1   4 8.68232 2.46276   3
 -45  -1  -4 5.46070 1.97569   1
 -45  -1  -4 7.53228 1.71745   2
 -45   1  -4 8.31645 1.66994   2
 -45   1  -4 7.02096 2.11353   1
 -47  -1  -4 2.04415 1.86833   1
  47  -1   4 1.18015 2.13968   3
 -47  -1  -4 -1.1884 1.26506   2
 -47   1  -4 2.88530 1.41800   2
 -47   1  -4 0.48572 1.73760   1
 -49  -1  -4 1.98801 1.43947   2
 -49  -1  -4 1.59575 1.85917   1
 -49   1  -4 0.66576 1.31719   2
 -49   1  -4 1.54838 1.86254   1
 -51  -1  -4 64.1862 5.97195   1
 -51  -1  -4 49.1865 5.36124   2
 -51   1  -4 45.3396 5.30127   2
 -51   1  -4 53.2942 5.73047   1
 -53  -1  -4 3.73407 2.08877   1
 -53  -1  -4 3.66874 1.62127   2
 -53   1  -4 6.63990 2.17534   1
 -53   1  -4 3.85025 1.47746   2
 -55  -1  -4 24.7869 3.64589   1
 -55  -1  -4 22.5751 3.11733   2
 -55   1  -4 26.9493 3.77704   1
 -55   1  -4 22.6609 3.05642   2
 -57  -1  -4 12.9385 2.40156   2
 -57  -1  -4 16.6736 3.10576   1
 -57   1  -4 14.7564 3.04672   1
 -57   1  -4 13.3087 2.34784   2
 -59  -1  -4 -0.9272 1.53528   2
 -59  -1  -4 1.65266 2.21103   1
 -59   1  -4 1.35252 1.49072   2
 -59   1  -4 -0.5081 2.19983   1
 -61  -1  -4 -0.1096 2.20905   1
 -61  -1  -4 0.38595 1.63995   2
 -61   1  -4 2.22509 1.54928   2
 -61   1  -4 -0.5896 2.23847   1
 -60  -2   4 8.46023 2.19535   2
 -60  -2   4 9.51261 2.66626   1
 -60   2   4 12.0386 2.64218   2
 -60   2   4 11.0353 2.67543   1
 -58  -2   4 -0.1824 1.56946   2
 -58  -2   4 -2.3146 1.92525   1
 -58   2   4 -2.7559 1.13365   2
 -58   2   4 1.60590 1.98173   1
 -56  -2   4 9.75475 2.58426   1
 -56  -2   4 6.31104 1.93163   2
 -56   2   4 7.62948 2.35958   1
 -56   2   4 9.19987 1.71763   2
 -54  -2   4 0.05762 1.45413   2
 -54  -2   4 -1.7837 1.75842   1
 -54   2   4 0.92523 1.85780   1
 -54   2   4 -0.2451 1.10975   2
 -52  -2   4 3.45613 1.56268   2
 -52  -2   4 2.20690 1.95001   1
 -52   2   4 1.88214 1.92191   1
 -52   2   4 2.48117 1.24575   2
 -50  -2   4 10.7507 2.37267   1
 -50  -2   4 7.26055 1.92613   2
 -50   2   4 9.25891 2.32652   1
 -50   2   4 10.0731 1.66801   2
 -48  -2   4 11.6755 2.15527   2
 -48  -2   4 12.1336 2.46450   1
 -48   2   4 11.7131 2.47196   1
 -48   2   4 12.0375 1.79450   2
 -46  -2   4 19.4939 3.33712   1
 -46  -2   4 31.2783 3.18984   2
 -46   2   4 28.1426 2.92159   2
 -46   2   4 22.3560 3.41411   1
 -44  -2   4 1.04920 1.59884   1
 -44  -2   4 2.91115 1.38431   2
 -44   2   4 0.71910 1.61392   1
 -44   2   4 1.81319 1.08751   2
 -42  -2   4 32.6539 4.18435   1
 -42  -2   4 38.3465 4.01584   2
 -42   2   4 39.6552 3.78643   2
 -42   2   4 36.2036 4.24864   1
 -40  -2   4 1.76576 1.44488   1
 -40  -2   4 -0.0013 1.18321   2
 -40   2   4 0.09107 1.40285   1
 -40   2   4 2.27400 0.96334   2
 -38  -2   4 3.48937 1.28860   2
 -38  -2   4 4.06050 1.56392   1
 -38   2   4 5.31488 1.63769   1
 -38   2   4 4.10115 1.03709   2
 -36  -2   4 9.60908 1.61759   2
 -36  -2   4 7.70241 1.84341   1
 -36   2   4 9.26660 1.35769   2
 -36   2   4 11.0710 1.91605   1
  34  -2  -4 33.6782 3.41854   2
 -34  -2   4 34.5697 3.78920   1
 -34  -2   4 33.5432 3.59796   2
 -34   2   4 34.3094 3.39113   2
 -34   2   4 34.6052 3.86355   1
  32  -2  -4 81.7685 7.76231   2
 -32  -2   4 77.7435 8.00480   1
 -32  -2   4 80.7680 7.88472   2
 -32   2   4 92.4609 7.74251   2
 -32   2   4 81.9858 8.02868   1
 -30  -2   4 8.42542 1.44051   2
 -30  -2   4 10.6672 1.80040   3
 -30  -2   4 7.49939 1.61574   1
 -30   2   4 9.65364 1.20535   2
 -30   2   4 7.64555 1.63699   1
 -28  -2   4 63.5171 5.53826   3
 -28  -2   4 50.4775 5.42546   1
 -28  -2   4 57.2690 5.30084   2
  28  -2  -4 53.9538 5.16363   2
 -28   2   4 52.5096 5.46655   1
 -28   2   4 51.7512 5.11903   2
 -26  -2   4 3.31485 1.17480   1
 -26  -2   4 2.30422 0.96108   2
  26  -2  -4 3.66152 0.81861   2
 -26   2   4 3.08457 0.70761   2
 -26   2   4 2.31787 1.18622   1
 -24  -2   4 4.52456 1.05445   2
 -24  -2   4 4.15046 1.19761   1
  24  -2  -4 3.70925 0.82501   2
 -24   2   4 4.33335 0.75613   2
 -24   2   4 3.93331 1.31055   1
 -22  -2   4 11.4879 1.57823   2
 -22  -2   4 11.2205 1.70431   1
 -22   2   4 11.9015 1.31198   2
 -22   2   4 12.3039 1.80606   1
 -20  -2   4 52.5548 5.14185   2
 -20  -2   4 57.1688 5.30326   1
 -20   2   4 58.4913 5.32174   1
 -20   2   4 49.6583 4.95935   2
  20   2  -4 56.0000 5.13757   2
 -18  -2   4 223.736 20.2128   2
 -18  -2   4 198.556 20.2680   1
 -18   2   4 210.474 20.0500   2
 -18   2   4 241.072 20.2901   1
  18   2  -4 242.657 20.2117   2
 -16  -2   4 10.8832 1.52853   1
 -16  -2   4 10.3394 1.37263   2
 -16   2   4 11.7410 1.09029   2
  16   2  -4 6.84694 1.23643   2
 -12  -2   4 5.03079 0.95959   2
 -12  -2   4 4.07682 1.05310   1
  12   2  -4 4.84660 0.89658   2
 -10  -2   4 59.1806 4.94731   2
 -10  -2   4 45.0274 4.96110   1
  -8  -2   4 4.13653 1.05791   1
  -8  -2   4 4.09796 0.97069   2
   8   2  -4 4.47469 0.86929   2
  -6  -2   4 22.1415 2.41910   1
  -6  -2   4 22.8485 2.34887   2
   4  -2  -4 260.968 22.9058   2
  -4  -2   4 248.586 23.1117   1
  -4  -2   4 230.089 23.0528   2
  -4   2   4 277.092 22.9004   2
  -2  -2   4 8.34594 1.50544   1
   0  -2  -4 3210.40 275.035   2
   0   2   4 2796.92 274.745   1
   0   2  -4 3195.92 274.847   2
  -2  -2  -4 46.6010 4.50220   1
   2  -2   4 48.4912 4.73548   3
  -2  -2  -4 54.6907 4.48117   2
   2  -2   4 44.8070 4.72492   1
   2   2   4 43.8365 4.68187   3
   2   2   4 45.5510 4.46146   1
   2   2   4 53.4021 4.48124   2
   4  -2   4 260.364 21.9613   3
  -4  -2  -4 233.440 21.8929   3
  -4  -2  -4 248.398 21.7416   2
   4   2   4 234.921 21.8447   3
   4   2   4 205.802 21.6956   1
   4   2   4 268.937 21.7537   2
  -6  -2  -4 34.3160 3.58768   1
   6  -2   4 41.4920 3.89587   3
  -6  -2  -4 38.9649 3.80580   3
  -6  -2  -4 38.4691 3.63708   2
  -6   2  -4 42.6141 3.87980   3
   6   2   4 40.2709 3.64111   2
   6   2   4 36.6714 3.58238   1
   6   2   4 39.4448 3.74790   3
  -8  -2  -4 2.99739 0.95280   3
  -8  -2  -4 4.65468 0.75819   2
   8  -2   4 3.78979 1.02798   3
   8   2   4 3.07493 0.65467   1
  -8   2  -4 3.10434 1.01562   3
   8   2   4 3.86272 0.72917   2
   8   2   4 4.25755 0.84320   3
 -10  -2  -4 71.1492 6.90733   1
 -10  -2  -4 73.0388 6.95408   2
  10  -2   4 71.5349 7.07467   3
 -10  -2  -4 79.1255 7.07043   3
  10   2   4 78.7532 6.96965   2
  10   2   4 72.8800 7.00888   3
  10   2   4 81.5631 6.92376   1
 -10   2  -4 76.1086 7.09079   3
 -12  -2  -4 5.72245 1.10213   3
  12  -2   4 3.90738 1.08948   3
 -12  -2  -4 5.10673 0.91087   2
 -12  -2  -4 4.21189 0.86829   1
 -12   2  -4 5.03034 1.09557   3
  12   2   4 5.76533 0.93956   2
  12   2   4 6.36930 1.02593   3
  12   2   4 5.90961 0.88695   1
 -14  -2  -4 138.619 12.5774   2
 -14  -2  -4 154.383 12.7205   3
 -14  -2  -4 145.128 12.5596   1
  14  -2   4 128.220 12.6890   3
  14   2   4 129.627 12.6316   3
  14   2   4 140.516 12.5554   1
 -14   2  -4 129.278 12.6831   3
  14   2   4 138.524 12.5765   2
 -16  -2  -4 11.9465 1.45612   1
 -16  -2  -4 12.8507 1.65706   3
 -16  -2  -4 13.9809 1.51794   2
  16  -2   4 9.29293 1.56837   3
  16   2   4 12.6698 1.45082   1
  16   2   4 12.0248 1.43088   2
  16   2   4 8.50761 1.46287   3
 -16   2  -4 11.3914 1.61740   3
 -18  -2  -4 242.365 20.0095   3
 -18  -2  -4 222.505 19.8766   2
  18  -2   4 191.814 19.9969   3
 -18  -2  -4 234.435 19.8715   1
  18   2   4 200.771 19.8535   1
  18   2   4 195.874 19.8451   2
  18   2   4 246.234 20.0250   3
 -20  -2  -4 59.3133 5.34288   1
 -20  -2  -4 58.3455 5.44602   3
  20  -2   4 50.3691 5.50396   3
 -20  -2  -4 56.6242 5.33573   2
  20   2   4 52.2494 5.31672   1
 -20   2  -4 53.2698 5.31882   2
  20   2   4 59.1187 5.45866   3
 -22  -2  -4 14.7227 1.82971   3
  22  -2   4 13.5883 1.91602   3
 -22  -2  -4 9.46268 1.59839   1
 -22  -2  -4 10.9110 1.59186   2
  22   2   4 9.51823 1.63058   1
  22   2   4 13.7830 1.83506   3
 -22   2  -4 10.4908 1.60944   2
 -24  -2  -4 2.41364 0.89874   3
 -24  -2  -4 1.73711 0.93660   2
 -24  -2  -4 2.90795 1.04889   1
  24  -2   4 2.56742 1.19951   3
  24   2   4 2.52126 1.11012   1
  24   2   4 3.53848 1.14948   3
 -24   2  -4 1.53566 1.00837   2
  26  -2   4 0.81650 1.11653   3
 -26  -2  -4 -0.6300 0.61693   3
 -26  -2  -4 1.80482 0.90498   2
 -26  -2  -4 1.92736 1.04938   1
 -26   2  -4 2.82090 0.96670   2
  26   2   4 2.17083 1.15881   3
 -28  -2  -4 54.3374 5.35033   3
 -28  -2  -4 51.1937 5.19328   2
 -28  -2  -4 59.3717 5.29727   1
  28  -2   4 45.0726 5.45639   3
 -28   2  -4 62.7259 5.24158   2
  28   2   4 49.7651 5.45000   3
  30  -2   4 4.66596 1.59031   3
 -30  -2  -4 7.02911 1.48682   3
 -30  -2  -4 11.6194 1.62434   1
 -30  -2  -4 9.23784 1.41583   2
 -30   2  -4 9.89121 1.39625   2
  30   2   4 4.24203 1.56003   3
 -32  -2  -4 81.9879 7.73597   1
  32  -2   4 68.7257 7.90700   3
 -32  -2  -4 75.8239 7.63459   2
 -32   2  -4 79.1679 7.59143   2
  32   2   4 99.1197 8.10211   3
 -34  -2  -4 34.2247 3.85032   1
 -34  -2  -4 34.9076 3.70117   2
  34  -2   4 34.0859 4.19442   3
 -34   2  -4 32.2079 3.62786   2
  34   2   4 39.8810 4.21012   3
  36  -2   4 7.28996 2.13254   3
 -36  -2  -4 10.0948 1.83471   1
 -36  -2  -4 8.29811 1.61244   2
  36   2   4 10.8513 2.10070   3
 -36   2  -4 7.77686 1.49964   2
 -38  -2  -4 1.77642 1.15664   2
  38  -2   4 2.51118 1.78840   3
 -38  -2  -4 3.60525 1.57815   1
  38   2   4 2.98289 1.71292   3
 -38   2  -4 1.74931 1.17155   2
 -40  -2  -4 1.97232 1.56502   1
 -40  -2  -4 1.49975 1.27147   2
  40  -2   4 -0.7370 1.71281   3
  40   2   4 -0.7014 1.62863   3
 -40   2  -4 0.59659 1.63717   1
 -40   2  -4 2.91209 1.26270   2
  42  -2   4 36.8275 4.49590   3
 -42  -2  -4 39.1786 4.11995   1
 -42  -2  -4 31.7352 3.85186   2
 -42   2  -4 37.9694 4.29434   1
 -42   2  -4 34.5613 3.84104   2
 -44  -2  -4 -0.1732 1.57716   1
  44  -2   4 -1.3127 1.90123   3
 -44  -2  -4 1.25811 1.34558   2
 -44   2  -4 1.76433 1.30793   2
 -44   2  -4 2.55145 1.82979   1
 -46  -2  -4 22.9198 3.10887   2
 -46  -2  -4 27.1478 3.48694   1
  46  -2   4 25.1183 3.83833   3
 -46   2  -4 26.6831 3.05373   2
 -46   2  -4 24.0648 3.52359   1
 -48  -2  -4 10.7530 2.09656   2
 -48  -2  -4 8.86675 2.29900   1
 -48   2  -4 14.2015 2.03308   2
 -48   2  -4 9.68804 2.43172   1
 -50  -2  -4 7.41651 2.23212   1
 -50  -2  -4 8.43069 1.94581   2
 -50   2  -4 7.22704 2.28519   1
 -50   2  -4 7.32444 1.76278   2
 -52  -2  -4 0.19875 1.99316   1
 -52  -2  -4 1.52141 1.62976   2
 -52   2  -4 4.04217 1.49561   2
 -52   2  -4 3.18223 2.00592   1
 -54  -2  -4 -0.1916 1.49280   2
 -54  -2  -4 -1.4271 1.92432   1
 -54   2  -4 0.37420 1.35259   2
 -54   2  -4 -1.6049 1.87684   1
 -56  -2  -4 6.07916 1.92263   2
 -56  -2  -4 7.70599 2.48100   1
 -56   2  -4 5.92284 2.38048   1
 -56   2  -4 8.32015 1.84755   2
 -58  -2  -4 -0.1294 1.57234   2
 -58  -2  -4 1.23079 2.08333   1
 -58   2  -4 1.26007 1.41982   2
 -58   2  -4 0.18351 1.97969   1
 -60  -2  -4 6.78656 2.08278   2
 -60  -2  -4 10.2356 2.81662   1
 -60   2  -4 4.91400 2.44546   1
 -60   2  -4 7.79515 1.88152   2
 -59  -3   4 -0.6058 2.16111   1
 -59  -3   4 1.72381 1.69898   2
 -59   3   4 -0.8135 1.89041   1
 -57  -3   4 6.19184 2.42766   1
 -57  -3   4 7.80655 2.01999   2
 -57   3   4 4.99431 2.32534   1
 -55  -3   4 9.51131 2.57671   1
 -55  -3   4 10.7507 2.29541   2
 -55   3   4 10.4161 2.65709   1
 -53  -3   4 3.14169 2.15446   1
 -53  -3   4 3.47793 1.67710   2
 -53   3   4 2.98644 1.21026   2
 -53   3   4 1.30101 1.90200   1
 -51  -3   4 16.4113 2.52984   2
 -51  -3   4 11.4345 2.66348   1
 -51   3   4 15.3320 2.76046   1
 -51   3   4 13.8379 1.96880   2
 -49  -3   4 -0.1362 1.39603   2
 -49  -3   4 0.30204 1.84510   1
 -49   3   4 0.55117 1.05808   2
 -49   3   4 0.42568 1.65115   1
 -47  -3   4 1.61842 1.53266   2
 -47  -3   4 4.90739 1.93551   1
 -47   3   4 2.11600 1.09488   2
 -47   3   4 1.34848 1.76060   1
 -45  -3   4 2.00339 1.75105   1
 -45  -3   4 0.41520 1.44136   2
 -45   3   4 0.42882 1.65811   1
 -45   3   4 1.14245 0.98664   2
 -43  -3   4 20.1001 2.69222   2
 -43  -3   4 17.1766 2.84882   1
 -43   3   4 20.1120 2.29774   2
 -43   3   4 19.2731 2.93005   1
 -41  -3   4 22.1841 2.98749   1
 -41  -3   4 22.6468 2.77428   2
 -41   3   4 19.6566 2.32851   2
 -41   3   4 19.5225 2.91041   1
 -39  -3   4 0.91528 1.55253   1
 -39  -3   4 4.12046 1.42010   2
 -39   3   4 3.08680 0.95988   2
 -39   3   4 2.41262 1.62193   1
 -37  -3   4 11.3351 1.88612   2
 -37  -3   4 12.2534 2.17452   1
 -37   3   4 14.0794 1.59392   2
 -37   3   4 8.89235 2.05035   1
 -35  -3   4 0.18066 1.15717   2
 -35  -3   4 0.74831 1.34794   1
 -35   3   4 1.01830 0.76900   2
 -35   3   4 1.92972 1.43195   1
 -33  -3   4 20.6135 2.96366   1
 -33  -3   4 22.0409 2.75881   2
 -33   3   4 23.4889 3.02795   1
 -33   3   4 27.3593 2.51838   2
 -31  -3   4 0.37794 1.22410   1
 -31  -3   4 -1.0419 1.00395   3
 -31  -3   4 -0.1761 0.98703   2
 -31   3   4 1.85253 0.71076   2
 -31   3   4 1.53725 1.37877   1
 -29  -3   4 22.3862 2.65925   2
 -29  -3   4 20.7647 2.70881   3
 -29  -3   4 25.2450 2.90151   1
 -29   3   4 24.1210 2.35170   2
 -29   3   4 24.1415 2.87097   1
 -27  -3   4 56.0171 5.70073   1
 -27  -3   4 54.7155 5.57513   2
 -27   3   4 60.2041 5.34811   2
 -25  -3   4 22.5547 3.06397   1
 -25  -3   4 31.4176 3.11822   3
 -25  -3   4 30.0455 3.07692   2
 -25   3   4 27.3397 2.71893   2
 -23  -3   4 161.248 14.7696   1
 -23  -3   4 160.860 14.6680   2
 -23   3   4 158.060 14.4487   2
 -21  -3   4 3.41653 1.16099   1
 -21  -3   4 2.12146 0.97986   2
 -21   3   4 2.49593 0.57893   2
 -19  -3   4 39.5078 3.97789   1
 -19  -3   4 40.2703 3.89953   2
 -19   3   4 37.5571 3.59216   2
 -17  -3   4 -0.1982 1.03858   1
 -17  -3   4 0.93394 0.90550   2
 -17   3   4 1.42487 0.44407   2
 -15  -3   4 7.24614 1.30531   2
 -15  -3   4 8.62046 1.47209   1
  15   3  -4 8.40162 1.71516   2
 -15   3   4 8.26256 0.94752   2
 -15   3   4 8.01599 1.23258   3
  15   3  -4 10.8598 1.62051   1
 -13  -3   4 0.27428 0.82458   2
 -13  -3   4 1.32037 1.01004   1
  13   3  -4 0.16943 1.07888   1
  13   3  -4 -0.0916 0.32912   2
 -13   3   4 1.28712 0.41512   2
 -11  -3   4 9.94221 1.46230   2
 -11  -3   4 8.89467 1.59926   1
 -11   3   4 10.6062 1.06924   2
  11   3  -4 10.4004 1.61156   1
  -9  -3   4 118.867 11.6468   1
  -9  -3   4 122.871 11.5933   2
  -9   3   4 131.667 11.3693   2
   9   3  -4 129.112 11.6806   1
  -7  -3   4 6.00232 1.34636   1
  -7  -3   4 7.74923 1.25184   2
  -7   3   4 6.51961 0.74957   2
   7   3  -4 5.85835 1.01946   2
   7   3  -4 5.60602 1.36434   1
  -5  -3   4 66.6684 6.16531   2
   5   3  -4 63.8622 6.27260   1
  -5   3   4 64.8972 5.91774   2
   3  -3  -4 -0.3355 0.54085   2
  -3  -3   4 1.74282 1.07710   1
  -3  -3   4 -0.0454 0.88634   2
   3   3  -4 -0.8808 0.98150   1
  -3   3   4 0.52171 0.38220   2
   3   3  -4 0.16708 0.74486   2
  -3   3   4 -0.2730 0.66414   1
  -1  -3   4 5.48090 1.41168   1
   1  -3  -4 6.18186 0.89405   2
  -1   3   4 7.49566 0.82370   2
   1   3  -4 6.63351 1.36431   1
  -1   3   4 5.64167 1.00543   1
   1   3  -4 5.74637 1.10244   2
  -1  -3  -4 6.45411 0.85767   2
  -1  -3  -4 5.81570 1.01145   1
   1  -3   4 5.17597 1.37055   1
  -1   3  -4 4.98030 1.09556   2
   1   3   4 4.26616 0.90812   1
   1   3   4 7.05986 0.79657   2
  -1   3  -4 5.88283 1.30735   1
   1   3   4 4.24835 0.95787   3
   3  -3   4 0.64246 0.96596   3
   3  -3   4 0.77114 1.10864   1
  -3  -3  -4 0.93338 0.61888   2
  -3  -3  -4 0.01725 0.77326   1
  -3   3  -4 0.45961 0.74449   2
   3   3   4 0.18000 0.58518   3
   3   3   4 0.93028 0.66709   1
   3   3   4 1.24828 0.49555   2
  -3   3  -4 0.19414 0.97585   1
  -5  -3  -4 77.1341 6.85549   1
  -5  -3  -4 74.4719 6.80876   2
  -5  -3  -4 71.9738 6.92455   3
   5  -3   4 76.1643 6.96253   3
   5   3   4 67.1979 6.78929   3
   5   3   4 76.2805 6.78780   2
  -5   3  -4 72.4733 6.99364   1
   5   3   4 77.7064 6.81850   1
  -7  -3  -4 7.20496 0.99288   2
   7  -3   4 5.79800 1.11699   3
  -7  -3  -4 4.74242 1.00266   1
  -7  -3  -4 6.71873 1.17491   3
  -7   3  -4 5.64497 1.25381   1
  -7   3  -4 5.29608 1.18237   3
   7   3   4 7.45900 0.95399   3
   7   3   4 4.79205 0.94451   1
   7   3   4 6.24146 0.89609   2
  -9  -3  -4 134.289 12.2616   2
   9  -3   4 139.890 12.3847   3
  -9  -3  -4 130.988 12.3456   3
  -9  -3  -4 129.469 12.2601   1
   9   3   4 138.131 12.2446   1
   9   3   4 139.405 12.2704   3
   9   3   4 121.788 12.2335   2
  -9   3  -4 144.414 12.4160   3
  -9   3  -4 134.113 12.3983   1
  11  -3   4 11.3220 1.56497   3
 -11  -3  -4 10.5263 1.46294   3
 -11  -3  -4 10.2345 1.37154   1
 -11  -3  -4 11.8680 1.39738   2
  11   3   4 9.31034 1.33451   3
  11   3   4 11.3193 1.32376   1
 -11   3  -4 10.2262 1.51518   3
  11   3   4 11.6448 1.35935   2
 -13  -3  -4 0.51654 0.78928   1
  13  -3   4 1.26091 0.93964   3
 -13  -3  -4 0.40978 0.82950   3
 -13  -3  -4 0.88875 0.73732   2
  13   3   4 0.41904 0.67782   1
  13   3   4 1.63083 0.73292   3
 -13   3  -4 0.16419 0.93725   3
  13   3   4 2.31698 0.75287   2
 -15  -3  -4 11.6818 1.47630   3
 -15  -3  -4 10.2333 1.37764   1
 -15  -3  -4 7.33005 1.29959   2
  15  -3   4 9.49492 1.51887   3
  15   3   4 10.0888 1.34239   1
 -15   3  -4 9.94265 1.55862   3
  15   3   4 9.78843 1.39381   3
  15   3   4 8.22452 1.27744   2
 -17  -3  -4 0.38636 0.84474   2
 -17  -3  -4 0.60396 0.87104   1
  17  -3   4 1.61976 1.03249   3
 -17  -3  -4 1.06744 0.91179   3
  17   3   4 0.15980 0.78384   3
  17   3   4 1.71922 0.85597   1
 -19  -3  -4 48.2050 4.41267   1
  19  -3   4 40.5838 4.53212   3
 -19  -3  -4 42.9197 4.48429   3
 -19  -3  -4 45.9107 4.41349   2
  19   3   4 52.3259 4.41525   1
  19   3   4 42.5579 4.47000   3
  21  -3   4 1.66910 1.16884   3
 -21  -3  -4 2.02139 0.95196   1
 -21  -3  -4 1.11818 0.91975   2
 -21  -3  -4 3.25500 1.02193   3
  21   3   4 2.55823 0.94722   1
  21   3   4 2.02317 0.98360   3
 -23  -3  -4 180.628 16.1681   1
  23  -3   4 168.928 16.3589   3
 -23  -3  -4 194.545 16.3202   3
 -23  -3  -4 170.906 16.1626   2
 -23   3  -4 175.131 16.1524   2
  23   3   4 177.316 16.2880   3
  23   3   4 166.610 16.4777   1
 -25  -3  -4 28.2648 2.94561   2
  25  -3   4 22.9594 3.16765   3
 -25  -3  -4 29.5496 2.97816   1
 -25  -3  -4 28.3204 3.02094   3
  25   3   4 24.4062 3.08736   3
 -25   3  -4 28.8292 2.86589   2
  27  -3   4 59.0088 6.10273   3
 -27  -3  -4 60.4027 5.83322   1
 -27  -3  -4 54.0678 5.77078   2
  27   3   4 67.7310 6.06275   3
 -27   3  -4 58.1470 5.75624   2
 -29  -3  -4 18.7357 2.65474   2
 -29  -3  -4 24.3241 2.77439   1
 -29  -3  -4 23.0143 2.74055   3
  29  -3   4 24.9381 3.03948   3
 -29   3  -4 24.3622 2.65851   2
  29   3   4 25.1946 2.98297   3
  31  -3   4 -1.4143 1.31366   3
 -31  -3  -4 -1.3725 1.12061   1
 -31  -3  -4 0.69202 1.06543   2
 -31  -3  -4 -1.4286 0.98991   3
  31   3   4 -1.1656 1.29545   3
 -31   3  -4 0.81629 0.97135   2
 -33  -3  -4 25.5464 2.80760   2
 -33  -3  -4 26.1450 2.83556   1
  33  -3   4 16.4801 2.91464   3
 -33   3  -4 23.7397 2.58456   2
  33   3   4 21.6146 2.99420   3
 -35  -3  -4 1.07061 1.18458   2
  35  -3   4 0.17034 1.69554   3
 -35  -3  -4 0.94657 1.29731   1
  35   3   4 -0.1427 1.45962   3
 -35   3  -4 1.19216 1.06799   2
 -37  -3  -4 12.2897 1.96416   2
  37  -3   4 9.66319 2.34956   3
 -37  -3  -4 11.1544 2.07214   1
 -37   3  -4 12.1466 1.81087   2
 -39  -3  -4 2.23027 1.55135   1
  39  -3   4 0.28154 1.77481   3
 -39  -3  -4 -0.2167 1.21181   2
 -39   3  -4 3.97059 1.31692   2
  41  -3   4 21.4719 3.20174   3
 -41  -3  -4 20.9883 2.82548   1
 -41  -3  -4 15.0125 2.52222   2
 -41   3  -4 18.9167 2.46990   2
  43  -3   4 16.6433 3.14073   3
 -43  -3  -4 17.9394 2.76659   1
 -43  -3  -4 17.2517 2.52405   2
 -43   3  -4 17.4506 2.39462   2
 -45  -3  -4 -1.2310 1.29546   2
 -45  -3  -4 -1.4664 1.56002   1
  45  -3   4 -0.3188 1.98382   3
 -45   3  -4 1.80940 1.84130   1
 -45   3  -4 2.31920 1.30588   2
 -47  -3  -4 2.94155 1.88815   1
 -47  -3  -4 3.40777 1.61771   2
  47  -3   4 0.61922 2.09636   3
 -47   3  -4 3.68430 1.48040   2
 -47   3  -4 2.31193 1.94828   1
 -49  -3  -4 0.23074 1.73514   1
 -49  -3  -4 -1.1556 1.42153   2
 -49   3  -4 -1.7036 1.82509   1
 -49   3  -4 0.27629 1.37893   2
 -51  -3  -4 14.0566 2.50798   2
 -51  -3  -4 16.0094 2.85593   1
 -51   3  -4 14.7231 2.29622   2
 -51   3  -4 14.3190 2.89599   1
 -53  -3  -4 5.58778 2.15156   1
 -53  -3  -4 3.04737 1.72676   2
 -53   3  -4 2.43663 2.10922   1
 -53   3  -4 2.91374 1.47532   2
 -55  -3  -4 8.52407 2.18764   2
 -55  -3  -4 12.8732 2.72694   1
 -55   3  -4 12.0147 2.72618   1
 -55   3  -4 11.3781 2.03839   2
 -57  -3  -4 4.37941 2.07126   2
 -57  -3  -4 5.73102 2.37727   1
 -57   3  -4 6.24341 1.66931   2
 -57   3  -4 9.34217 2.56570   1
 -59  -3  -4 -2.0223 1.64134   2
 -59  -3  -4 0.09918 2.08427   1
 -59   3  -4 2.67461 2.10504   1
 -59   3  -4 0.28122 1.36293   2
 -58  -4   4 -0.4636 2.24914   1
 -58  -4   4 -0.7688 1.73439   2
 -58   4   4 2.01072 2.09934   1
 -56  -4   4 -3.0766 1.99242   1
 -56  -4   4 -2.5557 1.49223   2
 -56   4   4 -0.0015 1.90194   1
 -54  -4   4 -1.3610 1.92401   1
 -54  -4   4 -1.7494 1.58275   2
 -54   4   4 1.75455 2.00227   1
 -52  -4   4 2.59015 2.16117   1
 -52  -4   4 1.32463 1.63106   2
 -52   4   4 1.90581 1.86045   1
 -50  -4   4 1.73748 1.96145   1
 -50  -4   4 0.90669 1.60335   2
 -50   4   4 1.17773 1.88668   1
 -48  -4   4 6.29651 1.96587   2
 -48  -4   4 4.25218 2.13205   1
 -48   4   4 9.59668 1.42262   2
 -48   4   4 7.08797 2.15787   1
 -46  -4   4 12.7764 2.40973   2
 -46  -4   4 15.6033 2.75496   1
 -46   4   4 14.5265 1.88567   2
 -46   4   4 14.3462 2.64243   1
 -44  -4   4 3.36494 1.58034   2
 -44  -4   4 0.43804 1.71082   1
 -44   4   4 0.82541 0.97509   2
 -44   4   4 1.46777 1.70326   1
 -42  -4   4 8.40497 2.10763   1
 -42  -4   4 11.1098 2.00706   2
 -42   4   4 8.76356 1.37784   2
 -42   4   4 6.49894 2.06197   1
 -40  -4   4 1.03036 1.50450   2
 -40  -4   4 1.92771 1.67974   1
 -40   4   4 0.64241 0.87106   2
 -40   4   4 -0.3227 1.56178   1
 -38  -4   4 2.67511 1.60778   1
 -38  -4   4 2.66765 1.43360   2
 -38   4   4 3.51645 0.94176   2
 -38   4   4 2.27748 1.62825   1
 -36  -4   4 -0.3768 1.43248   1
 -36  -4   4 -0.6008 1.18308   2
 -36   4   4 1.27224 0.77379   2
 -36   4   4 -1.2929 1.35964   1
 -34  -4   4 13.0033 2.22495   3
 -34  -4   4 14.3699 2.42339   1
 -34  -4   4 17.8352 2.35826   2
 -34   4   4 16.9426 2.44440   1
 -34   4   4 17.2677 1.81897   2
 -32  -4   4 52.8097 5.29099   2
 -32  -4   4 48.2295 5.39191   1
 -32  -4   4 55.1724 5.39072   3
 -32   4   4 51.8206 4.93537   2
 -30  -4   4 -0.0050 1.22876   1
 -30  -4   4 1.13801 1.23540   2
 -30  -4   4 -0.2431 0.48130   3
 -30   4   4 1.28473 0.69587   2
 -28  -4   4 27.4800 3.05478   2
 -28  -4   4 26.1467 3.22949   1
 -28  -4   4 29.0012 3.12833   3
 -28   4   4 26.2274 2.67017   2
 -26  -4   4 4.07545 1.20291   3
 -26  -4   4 5.10210 1.29533   2
 -26  -4   4 4.30478 1.42079   1
 -26   4   4 5.79987 0.84685   2
 -24  -4   4 -0.1949 0.80021   3
 -24  -4   4 0.78345 0.99614   2
 -24  -4   4 0.61239 1.11500   1
 -24   4   4 0.38360 0.52802   2
 -22  -4   4 1.96886 1.19543   1
 -22  -4   4 0.02781 0.97658   2
 -22   4   4 1.41189 0.53866   2
 -20  -4   4 14.4056 2.17695   1
 -20  -4   4 16.3197 2.10886   2
 -20   4   4 16.8793 1.68024   2
 -18  -4   4 31.6162 3.29197   2
 -18  -4   4 30.2787 3.38619   1
 -16  -4   4 2.09565 0.98588   2
 -16  -4   4 0.75490 1.24873   1
 -16   4   4 2.34014 0.56572   2
 -14  -4   4 -0.2868 1.07827   1
 -14  -4   4 -0.7585 0.91563   2
 -14   4   4 1.49252 0.50395   2
 -12  -4   4 -0.8919 0.96152   2
 -12  -4   4 1.89159 1.15035   1
 -12   4   4 -0.2540 0.43310   2
 -12   4   4 -0.0279 0.62461   3
 -10  -4   4 1.92811 1.05613   2
 -10  -4   4 3.34446 1.35609   1
 -10   4   4 1.49877 0.52377   2
 -10   4   4 2.00820 0.70389   3
  -8  -4   4 3.71241 1.20360   2
  -8  -4   4 0.79181 1.25057   1
  -8   4   4 1.41540 0.92667   1
  -8   4   4 3.30526 0.71641   3
  -8   4   4 3.37202 0.59885   2
  -6  -4   4 15.0743 2.20087   1
  -6  -4   4 14.5048 1.98130   2
   6  -4  -4 14.9378 1.70197   2
  -6   4   4 15.0249 1.81535   1
   6   4  -4 18.7403 2.58737   1
  -6   4   4 13.7556 1.52144   2
  -4  -4   4 35.5022 3.74346   2
  -4  -4   4 32.0867 3.85895   1
   4  -4  -4 38.2790 3.55968   2
   4   4  -4 34.6447 3.64105   2
  -4   4   4 34.7162 3.44849   2
   4   4  -4 43.7885 3.96496   1
  -4   4   4 40.8847 3.67225   1
  -2  -4   4 1.02037 1.30392   1
  -2  -4   4 -0.7109 1.08364   2
   2  -4  -4 -0.3670 0.76128   2
  -2   4   4 0.70502 0.68743   3
  -2   4   4 1.91463 0.57056   2
   2   4  -4 1.16024 0.86338   2
  -2   4   4 0.78689 0.85879   1
   2   4  -4 -0.0197 1.19907   1
   0  -4   4 57.6224 5.80288   3
   0  -4   4 65.5154 6.05430   1
   0  -4  -4 56.1001 5.67407   2
   0   4   4 62.4428 5.62828   2
   0   4   4 57.1155 5.60493   3
   0   4   4 65.5036 5.78476   1
   0   4  -4 70.8157 6.05419   1
   0   4  -4 61.1433 5.78946   2
  -2  -4  -4 1.44325 1.05864   1
  -2  -4  -4 3.28844 0.84973   2
   2  -4   4 -0.1636 1.33417   1
   2  -4   4 3.33625 1.02898   3
   2   4   4 2.38513 0.63129   2
  -2   4  -4 1.79695 1.27374   1
   2   4   4 0.83201 0.45863   3
  -2   4  -4 3.08383 0.91075   2
   2   4   4 1.35387 0.93255   1
   4  -4   4 34.9553 3.13240   3
  -4  -4  -4 26.4889 2.98492   2
   4  -4   4 28.0067 3.38722   1
  -4   4  -4 30.3704 3.08102   2
  -4   4  -4 23.3054 3.24809   1
   4   4   4 34.5340 2.85708   3
   4   4   4 28.5647 2.92026   2
   4   4   4 27.1349 3.07633   1
   6  -4   4 11.8309 1.66365   3
  -6  -4  -4 12.6608 1.71740   3
  -6  -4  -4 13.4688 1.63498   2
  -6  -4  -4 11.8866 1.73260   1
   6   4   4 13.1122 1.50501   2
   6   4   4 15.2107 1.41438   3
   6   4   4 10.7923 1.63214   1
  -6   4  -4 14.8579 1.67070   2
  -8  -4  -4 3.68780 1.06766   1
  -8  -4  -4 4.15233 0.96297   2
  -8  -4  -4 4.12868 1.01224   3
   8  -4   4 2.43830 0.95361   3
   8   4   4 4.07442 0.77814   2
   8   4   4 4.21041 0.97789   1
   8   4   4 2.67699 0.65193   3
 -10  -4  -4 1.44378 0.88045   3
 -10  -4  -4 2.85299 0.89989   2
  10  -4   4 1.04976 0.90189   3
 -10  -4  -4 1.73955 0.95948   1
  10   4   4 3.37033 0.75005   2
 -10   4  -4 1.88938 1.04724   3
  10   4   4 2.84478 0.93393   1
  10   4   4 1.22645 0.59503   3
 -12  -4  -4 0.80411 0.90757   1
 -12  -4  -4 0.74087 0.84488   2
  12  -4   4 -0.3620 0.88183   3
 -12  -4  -4 0.57955 0.79697   3
  12   4   4 0.75117 1.04469   2
 -12   4  -4 -0.9846 0.95777   3
  12   4   4 0.21458 0.56816   3
  12   4   4 0.72098 0.81656   1
 -14  -4  -4 1.48575 0.84889   2
 -14  -4  -4 1.05166 0.84365   3
 -14  -4  -4 1.31288 0.91912   1
  14  -4   4 -0.8078 0.87241   3
  14   4   4 1.44314 0.82055   1
  14   4   4 0.21963 0.65507   3
 -16  -4  -4 1.32067 0.90652   3
  16  -4   4 0.32864 0.98196   3
 -16  -4  -4 3.60165 0.96162   2
 -16  -4  -4 3.06000 0.97503   1
  16   4   4 1.57338 0.78050   3
  16   4   4 2.82306 0.89122   1
 -18  -4  -4 42.3256 3.79373   3
 -18  -4  -4 34.1847 3.63158   1
 -18  -4  -4 27.7655 3.56530   2
  18  -4   4 39.8870 3.84831   3
  18   4   4 37.9296 3.67457   3
  18   4   4 33.7216 3.61870   1
 -20  -4  -4 18.0351 2.21975   3
 -20  -4  -4 17.0419 2.18565   2
  20  -4   4 17.0960 2.33514   3
 -20  -4  -4 20.7209 2.18983   1
  20   4   4 18.9078 2.17448   1
  20   4   4 17.4356 2.22088   3
 -22  -4  -4 0.98442 0.98185   3
  22  -4   4 -0.8995 1.08419   3
 -22  -4  -4 0.63144 0.94486   1
 -22  -4  -4 1.70985 0.97267   2
  22   4   4 0.03257 0.88751   3
 -24  -4  -4 -0.1596 1.00000   1
 -24  -4  -4 2.26608 1.02796   2
 -24  -4  -4 0.82245 0.93840   3
  24  -4   4 0.62041 1.19044   3
  24   4   4 0.90337 0.99975   3
 -26  -4  -4 3.22577 1.26990   2
 -26  -4  -4 6.34259 1.37187   3
  26  -4   4 4.75973 1.56537   3
 -26  -4  -4 4.97008 1.34028   1
  26   4   4 3.41287 1.28685   3
 -28  -4  -4 26.7192 3.13568   3
 -28  -4  -4 27.1285 3.07985   1
 -28  -4  -4 26.2027 3.02881   2
  28  -4   4 27.9952 3.43004   3
  28   4   4 29.4628 3.29511   3
 -28   4  -4 27.1854 3.00580   2
 -30  -4  -4 0.56142 1.12736   2
  30  -4   4 0.24426 1.48956   3
 -30  -4  -4 0.95507 1.20730   1
 -30  -4  -4 0.56262 0.64984   3
 -30   4  -4 0.33584 1.09966   2
 -32  -4  -4 53.8993 5.35000   1
 -32  -4  -4 53.0239 5.44442   3
 -32  -4  -4 52.3035 5.30186   2
  32  -4   4 44.7634 5.61698   3
 -32   4  -4 58.3798 5.24401   2
  34  -4   4 12.2978 2.58693   3
 -34  -4  -4 13.9167 2.16647   2
 -34  -4  -4 14.9929 2.28235   1
 -34  -4  -4 15.6017 2.38234   3
 -34   4  -4 17.0389 2.11151   2
 -36  -4  -4 -0.0463 1.41987   1
 -36  -4  -4 -0.5068 1.24083   2
  36  -4   4 -1.9769 1.71110   3
 -36   4  -4 -1.4639 1.06392   2
  38  -4   4 0.85869 1.83491   3
 -38  -4  -4 2.10097 1.51765   1
 -38  -4  -4 1.99238 1.37326   2
 -38   4  -4 1.44117 1.18361   2
  40  -4   4 0.45751 1.82412   3
 -40  -4  -4 0.81673 1.38318   2
 -40  -4  -4 1.43108 1.60324   1
 -40   4  -4 1.85186 1.25016   2
  42  -4   4 4.72353 2.31337   3
 -42  -4  -4 7.72050 1.87639   2
 -42  -4  -4 7.83352 1.98891   1
 -42   4  -4 8.13330 1.63619   2
 -44  -4  -4 1.91361 1.76173   1
 -44  -4  -4 -0.2630 1.41642   2
  44  -4   4 0.69499 1.91938   3
 -44   4  -4 0.32749 1.25365   2
 -46  -4  -4 17.7508 2.73806   1
 -46  -4  -4 11.3380 2.36837   2
 -46   4  -4 14.1778 2.19848   2
 -48  -4  -4 5.97064 1.95523   2
 -48  -4  -4 7.44157 2.23248   1
 -48   4  -4 6.45224 1.63759   2
 -50  -4  -4 -0.1923 1.70935   2
 -50  -4  -4 3.20304 2.05719   1
 -50   4  -4 1.50874 1.39413   2
 -50   4  -4 3.06645 2.01546   1
 -52  -4  -4 1.52891 1.96564   1
 -52  -4  -4 2.36073 1.79914   2
 -52   4  -4 1.35940 1.37473   2
 -52   4  -4 4.13791 2.15494   1
 -54  -4  -4 -2.3955 1.85811   1
 -54  -4  -4 -2.3997 1.56246   2
 -54   4  -4 -0.2120 1.97260   1
 -54   4  -4 2.67459 1.43394   2
 -56  -4  -4 -1.8647 2.00110   1
 -56  -4  -4 -0.7948 1.68328   2
 -56   4  -4 1.24576 2.07943   1
 -56   4  -4 0.08648 1.31218   2
 -58   4  -4 -0.0410 1.96202   1
 -55  -5   4 3.20249 2.03326   2
 -55  -5   4 5.22116 2.32933   1
 -55   5   4 3.47179 2.08428   1
 -53  -5   4 -0.6496 2.02621   1
 -53  -5   4 1.27435 1.84357   2
 -53   5   4 0.02837 1.92359   1
 -51  -5   4 1.06940 1.96479   1
 -51  -5   4 4.08145 1.93486   2
 -51   5   4 0.87447 1.82683   1
 -49  -5   4 -0.1213 1.61851   2
 -49  -5   4 2.30266 1.97937   1
 -49   5   4 1.97119 1.81382   1
 -47  -5   4 -0.5167 1.56098   2
 -47  -5   4 -1.6206 1.70180   1
 -47   5   4 2.03028 1.84312   1
 -45  -5   4 -0.1496 1.52440   2
 -45  -5   4 -0.2046 1.69486   1
 -45   5   4 2.40039 1.91005   1
 -43  -5   4 0.67945 1.65307   1
 -43  -5   4 0.17378 1.57286   2
 -43   5   4 0.13924 1.76949   1
 -41  -5   4 3.57440 1.60817   2
 -41  -5   4 1.75112 1.67672   1
 -41   5   4 3.79597 1.89700   1
 -41   5   4 2.11906 0.93044   2
 -39  -5   4 2.99014 1.81007   1
 -39  -5   4 0.70921 1.60799   2
 -39   5   4 5.60354 1.01748   2
 -39   5   4 3.96458 1.82629   1
 -37  -5   4 1.25275 1.57127   1
 -37  -5   4 -0.3179 1.38966   2
 -37   5   4 -0.1131 0.76255   2
 -35  -5   4 0.02996 1.38728   2
 -35  -5   4 -0.1208 1.46322   1
 -35   5   4 0.93124 0.77691   2
 -33  -5   4 0.75661 1.39912   2
 -33  -5   4 0.73502 1.50647   1
 -33   5   4 1.86487 0.75435   2
 -31  -5   4 6.87953 1.66210   2
 -31  -5   4 3.27478 1.33759   3
 -31  -5   4 7.02493 1.72817   1
 -31   5   4 5.58704 0.93176   2
 -29  -5   4 -1.9526 0.97751   3
 -29  -5   4 -0.4059 1.16270   2
 -29  -5   4 -2.8457 1.33110   1
 -29   5   4 0.44059 0.63696   2
 -27  -5   4 0.38655 1.28524   1
 -27  -5   4 1.23950 1.22461   2
 -27  -5   4 -1.1585 0.92778   3
 -27   5   4 0.71063 0.62607   2
 -25  -5   4 1.66679 1.22567   2
 -25  -5   4 -1.4414 0.88970   3
 -25  -5   4 1.25787 1.33096   1
 -25   5   4 0.58496 0.59580   2
 -23  -5   4 17.9362 2.55448   1
 -23  -5   4 17.4619 2.36882   2
 -23  -5   4 17.2003 2.23041   3
 -23   5   4 19.0017 1.89131   2
 -23   5   4 17.8760 1.89785   2
 -21  -5   4 8.96581 1.80921   1
 -21  -5   4 6.23737 1.26846   3
 -21  -5   4 7.47788 1.52903   2
 -21   5   4 9.11595 1.08035   2
 -19  -5   4 38.0853 3.82173   1
 -19  -5   4 32.1519 3.69644   2
 -19   5   4 33.8079 3.27467   2
 -17  -5   4 12.1179 1.86188   1
[truncated: 944,800 more chars]
